# Supplementary material for: The association between multimorbidity and intrinsic capacity among older adults: The mediating role of frailty
Source: Research Square preprint supplement (doi:10.21203/rs.3.rs-6895928/v1), 2025-06-27
Supplement: Supplementary file 1 [file 7a08d579e2a7c9293fd63a98.docx]

## **Supplementary materials**

**Table S1.** Spearman’s correlations between the studied variables (N = 468).

|  | IC | Multimorbidity | Frailty |
| --- | --- | --- | --- |
| IC | -- |  |  |
| Multimorbidity | 0.223** | -- |  |
| Frailty | 0.299** | 0.194** | -- |

Abbreviations: IC: intrinsic capacity

Note: **P＜0.01

**Table S2.** Mediated effects of of frailty in the association of multimorbidity with IC.

| Outcome variable | Predictor | R | R² | F | β | t |
| --- | --- | --- | --- | --- | --- | --- |
| Frailty |  | 0.248 | 0.061 | 30.412*** |  |  |
|  | Multimorbidity |  |  |  | 0.247 | 5.515*** |
| IC |  | 0.310 | 0.096 | 24.720*** |  |  |
|  | Multimorbidity |  |  |  | 0.154 | 3.377*** |
|  | Frailty |  |  |  | 0.235 | 5.140*** |

Abbreviations: IC: intrinsic capacity

Note: ***P＜0.001

**Table S3.** The mediation analyses between multimorbidity and IC.

| Effect Type | Path | Estimate | 95%CI Lower | 95%CI Upper | P-value |
| --- | --- | --- | --- | --- | --- |
| Direct effect | Multimorbidity→IC | 0.154 | 0.064 | 0.243 | ＜0.001 |
| Indirect effect | Multimorbidity→Frailty→IC | 0.058 | 0.029 | 0.092 | ＜0.001 |
| Total Effect |  | 0.211 | 0.123 | 0.3 | ＜0.001 |

Abbreviations: IC: intrinsic capacity


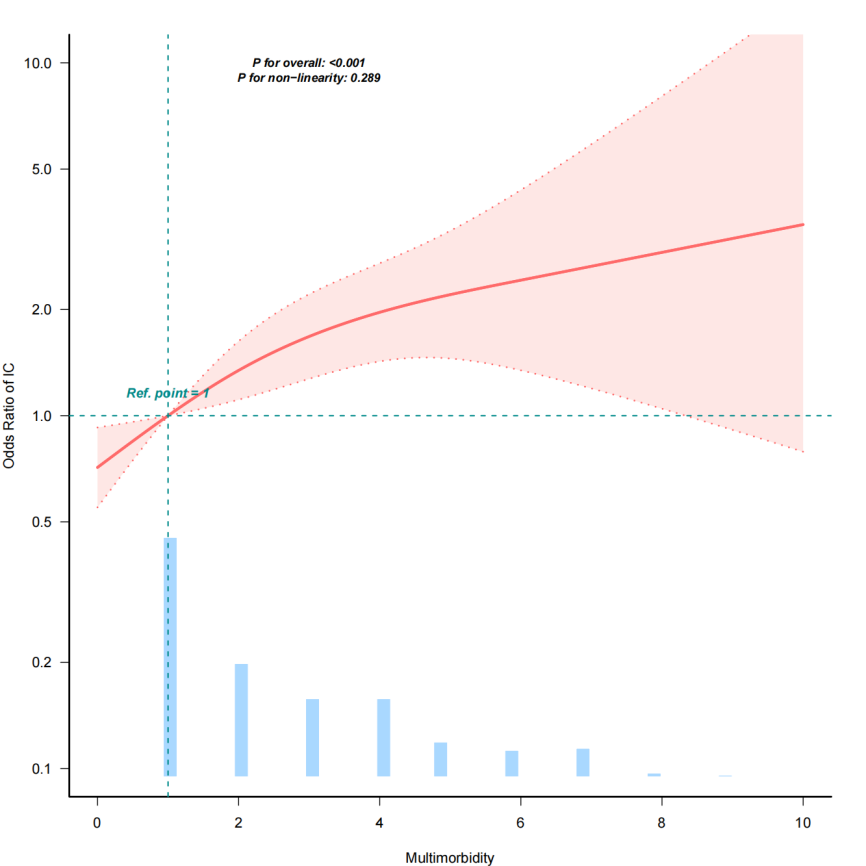


**Fig. S1.** Weighted restricted cubic spline curve describing the relationship between multimorbidity and IC.

Abbreviations: IC: intrinsic capacity
