# Supplementary material for: The association between multimorbidity and intrinsic capacity among older adults: The mediating role of frailty
Source: Research Square preprint supplement (doi:10.21203/rs.3.rs-6895928/v1), 2025-06-27
Supplement: Supplementary file 2 [file 91bf62e2e0ce0394a1cf28a8.xlsx]

## Sheet: 0
SEQN	性别	民族	区县	身高	体重	婚姻	1. 您上周多数时间感到疲劳吗?	2. 您能上一层楼吗?	3. 您能行走一个街区（500米）的距离吗?	4. 您患有5种以上的疾病吗?（心脏病、高血压、卒中、帕金森、糖尿病、慢性肺病、哮喘、关节炎、骨质疏松、消化道溃疡、白内障、骨折、肿瘤、其他）	5. 您最近1年内体重下降超过5%吗?	FRAIL衰弱评估量表得分。计算以上5题的总分	FRAIL衰弱评定（根据前1列的得分，0=0，1=1,2=2,≥3=3	进食	洗澡	修饰	穿衣	控制大便	控制小便	上厕所	床椅转移	行走	上下楼梯	日常生活能力ADL评定量表得分	1 近3个月内有无跌倒	2 老人有两个或两个以上诊断疾病	3 使用行走辅助用具	4 静脉输液	5 步 态	6 认知状态（可问照护者）	Morse跌倒危险因素评估量表	表9. 疼痛评估（VAS）用数字式0~10代替文字来表示疼痛的程度。将一条直线等分为10段，按0~10分次序评估疼痛程度。书写方式为：在描述过去24小时内最严重的疼痛的数字上画圈。0 无痛1-3 轻度疼痛（疼痛不影响睡眠）（选2）4-6 中度疼痛（选5）7-9 重度疼痛（不能入睡或者睡眠中痛醒）（选8）10 剧痛（难以忍受，生不如死）	活动能力	自理能力	日常活动	疼痛/不舒适	焦虑/抑郁	面部表情（如图说示）	生活质量评定（EQ-5D）	1.记住3个词汇:(例如)花朵,门，米饭（指导语：现在我要考察您的记忆力，我说3个词语，我说完后请您大声重复，并且努力记住，因为过一会我会要您回忆出这3个词语）	2.时间及空间定向力:今天的日期是?现在身在何处(家、诊所等)?	3.回忆第1问中的三个词汇?(指导语：请说出刚才我让您记住的三个词语)（不能完全回答出三个词语，则选否）	认知障碍初筛：前3个问题，只要有1个回答否就填1，否则填0。	I定向力（10分）—星期几	几号	几月	什么季节（季节交替时间前后两周时间段，回答两个季节其中一个都对）	哪一年	省
15	1	1	3	180	75	4	1	1	1	1	0	4	3	10	0	0	0	10	10	0	10	5	0	2	0	15	15	0	20	15	3	0	1	1	1	2	2	4	1	否	是	是	1	0	0	0	0	0	0
16	1	1	3	180	75	4	0	1	1	0	0	2	2	0	0	0	0	0	0	0	0	0	0	0	0	0	0	0	0	0	0	0	0	0	0	0	0	0	0	是	是	是	0	0	0	0	0	0	0
17	2	1	3	1.64	60	4	1	1	1	0	0	3	3	0	0	0	0	0	0	0	0	0	0	4	0	0	0	0	20	0	1	0	0	0	0	2	2	4	1	是	否	否	1	0	0	0	0	0	0
18	2	1	3	155	56	4	0	1	0	0	0	1	1	0	0	0	0	0	0	0	0	0	0	0	0	0	0	0	0	0	0	0	0	0	0	0	0	0	0	是	否	否	1	0	0	0	0	0	0
19	2	1	3	1.6	60	4	0	1	1	0	0	2	2	0	0	0	0	0	0	0	0	0	0	4	0	0	0	0	20	0	1	0	0	0	0	2	2	4	1	是	否	否	1	0	0	0	0	0	0
20	1	1	3	170	61	2	0	1	1	0	1	3	3	5	0	0	5	5	10	10	10	10	0	2	0	0	15	0	20	0	2	0	1	1	1	2	2	4	1	否	是	否	1	0	0	0	0	0	0
21	2	1	3	1.58	65	2	1	1	1	0	0	3	3	0	0	0	0	10	10	10	10	10	0	2	0	0	15	0	20	0	2	6	1	1	1	1	2	4	1	是	否	否	1	0	0	0	0	0	0
22	1	1	3	170	55	4	0	1	0	0	0	1	1	0	0	0	0	0	0	0	0	0	0	0	0	0	0	0	0	0	0	0	0	0	0	0	0	0	0	否	否	否	1	0	0	0	0	0	0
23	2	1	3	1.58	62	4	0	1	1	0	0	2	2	0	0	0	0	10	10	10	10	5	0	2	0	0	15	0	20	0	2	5	1	0	0	1	2	4	1	是	否	否	1	0	0	0	0	0	0
26	1	1	6	1.6	70	1	1	0	0	0	0	1	1	0	0	0	0	0	0	0	0	0	0	4	0	0	0	0	0	0	0	0	0	0	0	0	0	0	0	否	否	否	1	0	0	0	0	0	0
27	1	1	6	165	60	1	0	0	0	0	0	0	0	0	0	0	0	0	0	0	0	0	0	4	0	0	0	0	0	0	0	0	0	0	0	0	0	0	0	是	是	是	0	0	0	0	0	0	0
28	1	1	6	1.75	65	1	0	0	0	0	0	0	0	0	0	0	0	0	0	0	0	0	0	4	0	0	0	0	0	0	0	0	0	0	0	0	0	0	0	是	否	否	1	0	0	1	0	1	1
29	1	1	6	1.6	80	1	1	0	0	0	0	1	1	0	0	0	0	0	0	0	0	0	0	4	0	0	0	0	0	0	0	0	0	0	0	0	0	0	0	是	是	是	0	0	0	0	0	0	0
30	1	1	6	150	60	1	1	0	0	0	0	1	1	0	0	0	0	0	0	0	0	0	0	4	0	0	0	0	0	0	0	0	0	0	0	0	0	0	0	是	是	否	1	0	0	0	0	0	1
31	1	9999	6	1.65	70	1	1	1	0	0	0	2	2	0	0	0	0	0	0	0	0	0	0	0	0	0	0	0	0	0	0	0	0	0	0	0	0	0	0	是	否	否	1	0	0	0	0	0	0
32	1	1	6	1.71	73	1	0	0	0	0	0	0	0	0	0	0	0	0	0	0	0	0	0	0	0	0	0	0	0	0	0	0	0	0	0	0	0	0	0	否	是	否	1	1	1	1	1	1	1
33	1	1	6	1.7	80	1	0	1	1	0	0	2	2	0	0	0	0	0	0	0	0	0	0	0	0	0	0	0	0	0	0	0	0	0	0	0	0	0	0	是	否	否	1	0	0	0	0	0	0
34	1	1	6	160	57.5	1	1	0	0	1	0	2	2	10	5	5	10	10	10	10	15	15	10	0	0	15	0	0	0	0	1	2	2	2	2	1	2	5	1	是	是	是	0	0	0	0	0	0	0
35	1	1	6	1.65	60	1	1	1	1	0	0	3	3	0	0	0	0	0	0	0	0	0	0	0	0	0	0	0	0	0	0	0	0	0	0	0	0	0	0	否	否	否	1	0	0	0	0	0	0
36	1	1	6	1.6	65	1	1	0	0	1	0	2	2	10	5	0	10	10	10	10	15	15	10	1	0	15	0	0	0	0	1	0	2	2	2	2	2	5	1	否	否	否	1	0	0	0	0	0	0
37	2	1	1	1.49	61	2	0	0	0	0	0	0	0	0	0	0	0	0	0	0	0	0	0	0	0	0	0	0	0	0	0	0	0	0	0	0	0	0	0	是	否	是	1	0	0	0	0	0	0
38	2	1	1	1.56	73	2	0	0	0	0	0	0	0	0	0	0	0	0	0	0	0	0	0	0	0	0	0	0	0	0	0	0	0	0	0	0	0	0	0	是	是	否	1	1	1	1	1	1	1
39	1	1	1	1.8	95	2	1	0	0	1	0	2	2	10	5	5	10	10	10	10	15	15	10	0	0	15	0	0	0	0	1	0	2	2	2	2	2	4	1	是	是	是	0	0	0	0	0	0	0
40	1	1	1	1.73	62	2	1	0	0	0	0	1	1	10	5	5	10	10	10	10	15	15	10	0	0	15	0	0	0	0	0	0	2	2	2	0	2	0	1	是	是	是	0	0	0	0	0	0	0
41	2	1	1	1.6	55	4	1	0	0	1	0	2	0	10	5	5	10	10	10	10	15	15	10	0	0	15	0	0	10	0	1	2	1	2	2	1	2	3	1	是	是	是	0	0	0	0	0	0	0
42	2	1	1	1.58	51	2	0	0	0	0	0	0	2	0	0	0	0	0	0	0	0	0	0	0	0	0	0	0	0	0	0	0	0	0	0	0	0	0	0	是	否	是	1	0	0	0	0	0	0
43	1	1	1	1.72	51	2	0	0	0	0	0	0	1	0	0	0	0	0	0	0	0	0	0	0	0	0	0	0	0	0	0	0	0	0	0	0	0	0	0	是	是	是	0	0	0	0	0	0	0
44	2	1	1	1.58	70	2	1	0	0	0	0	1	1	0	0	0	0	0	0	0	0	0	0	0	0	0	0	0	0	0	0	0	0	0	0	0	0	0	0	是	否	否	1	0	1	0	0	0	0
45	1	1	1	1.63	80	2	0	0	0	0	0	0	0	0	0	0	0	0	0	0	0	0	0	0	0	0	0	0	0	0	0	0	0	0	0	0	0	0	0	是	是	9999	0	0	0	0	0	0	0
46	2	1	1	1.47	60	4	1	0	0	1	0	2	3	10	5	5	10	10	10	10	15	15	10	0	0	15	0	0	10	0	2	2	2	2	2	1	2	4	1	否	否	否	1	1	0	1	1	1	1
47	2	1	1	1.66	75	2	1	0	0	0	0	1	1	0	0	0	0	0	0	0	0	0	0	0	0	0	0	0	0	0	0	0	0	0	0	0	0	0	0	是	是	是	0	0	0	0	0	0	0
48	1	1	1	1.66	135	4	1	0	1	1	0	3	3	10	5	5	10	10	10	10	15	15	10	1	0	15	0	0	10	0	0	8	2	2	2	1	0	5	1	是	是	是	0	0	0	0	0	0	0
49	1	1	1	1.6	65	2	0	0	0	0	0	0	2	0	0	0	0	0	0	0	0	0	0	0	0	0	0	0	0	0	0	0	0	0	0	0	0	0	0	是	是	是	0	0	0	0	0	0	0
50	2	1	1	1.65	75	4	1	0	0	1	0	2	2	10	5	5	10	10	10	10	15	15	10	0	0	0	0	0	0	0	0	0	2	2	2	2	2	5	1	是	是	是	0	0	0	0	0	0	0
51	2	1	1	1.55	67	2	0	0	0	0	1	1	3	0	0	0	0	0	0	0	0	0	0	0	0	0	0	0	0	0	0	0	0	0	0	0	0	0	0	否	是	否	1	1	1	1	1	1	1
52	1	1	1	1.7	65	2	0	0	0	0	0	0	1	0	0	0	0	0	0	0	0	0	0	0	0	0	0	0	0	0	0	0	0	0	0	0	0	0	0	否	否	否	1	0	0	0	0	0	1
55	1	1	1	1.69	64.9	2	0	0	0	1	0	1	1	0	0	0	0	0	0	0	0	0	0	0	0	0	0	0	0	0	0	0	0	0	0	0	0	0	0	是	是	是	0	0	0	0	0	0	0
57	2	1	1	1.57	70.3	4	1	0	0	0	1	2	2	10	5	5	10	10	10	10	15	15	10	0	0	0	0	0	0	0	0	1	2	2	2	2	2	5	1	是	是	是	0	0	0	0	0	0	0
58	1	1	1	172.5	61.3	2	0	0	0	0	0	0	0	0	0	0	0	0	0	0	0	0	0	0	0	0	0	0	0	0	0	0	0	0	0	0	0	0	0	是	是	是	0	0	0	0	0	0	0
59	1	1	1	150	62.2	4	0	1	1	1	0	3	3	0	0	0	0	0	0	0	0	0	0	0	0	0	0	0	0	0	0	0	0	0	0	0	0	0	0	否	是	否	1	1	1	1	1	0	1
60	2	1	1	1.59	67	2	0	0	0	1	0	1	1	0	0	0	0	0	0	0	0	0	0	0	0	0	0	0	0	0	0	0	0	0	0	0	0	0	0	是	是	是	0	0	0	0	0	0	0
61	1	1	1	1.7	71	2	0	0	0	0	0	0	0	0	0	0	0	0	0	0	0	0	0	0	0	0	0	0	0	0	0	0	0	0	0	0	0	0	0	是	是	是	0	0	0	0	0	0	0
62	1	1	6	1.65	75	1	1	1	1	0	0	3	3	0	0	0	0	0	0	0	0	0	0	0	0	0	0	0	0	0	0	0	0	0	0	0	0	0	0	是	是	是	0	0	0	0	0	0	0
63	1	1	1	1.65	65	2	0	0	0	0	0	0	0	0	0	0	0	0	0	0	0	0	0	0	0	0	0	0	0	0	0	0	0	0	0	0	0	0	0	是	是	是	0	0	0	0	0	0	0
64	1	1	6	1.7	73	1	1	1	1	0	0	3	3	0	0	0	0	0	10	0	0	0	0	4	0	15	30	20	0	0	3	3	0	0	1	1	2	4	1	是	是	是	0	0	0	0	0	0	0
66	1	1	1	1.66	70	4	1	0	0	0	0	1	1	0	0	0	0	0	0	0	0	0	0	0	0	0	0	0	0	0	0	0	0	0	0	0	0	0	0	是	是	是	0	0	0	0	0	0	0
67	2	1	1	1.6	56	4	1	1	0	0	0	2	2	0	0	0	0	0	0	0	0	0	0	0	0	0	0	0	0	0	0	0	0	0	0	0	0	0	0	9999	是	否	1	1	1	1	1	0	1
68	1	1	3	1.67	60	2	0	0	0	0	0	0	0	0	0	0	0	0	0	0	0	0	0	0	0	0	0	0	0	0	0	0	0	0	0	0	0	0	0	是	是	是	0	0	0	0	0	0	0
69	1	1	1	1.7	70	2	1	0	1	0	0	2	2	10	0	5	10	10	10	10	15	15	5	1	0	15	0	0	0	0	1	0	1	1	2	2	2	4	1	是	是	是	0	0	0	0	0	0	0
70	2	1	1	1.68	60	4	0	0	0	0	0	0	0	10	5	5	10	10	10	10	15	15	10	0	0	0	0	0	0	0	0	0	2	2	2	2	2	4	1	是	是	是	0	0	0	0	0	0	0
71	2	1	1	1.5	65	2	0	0	1	0	0	1	1	0	0	0	0	0	0	0	0	0	0	0	0	0	0	0	0	0	0	0	0	0	0	0	0	0	0	是	是	是	0	0	0	0	0	0	0
72	2	1	1	1.55	60	4	0	0	0	0	0	0	0	0	0	0	0	0	0	0	0	0	0	0	0	0	0	0	0	0	0	0	0	0	0	0	0	0	0	是	是	是	0	0	0	0	0	0	0
73	2	1	2	1.6	60	4	1	0	0	0	0	1	1	0	0	0	0	0	0	0	0	0	0	0	0	0	0	0	0	0	0	0	0	0	0	0	0	0	0	是	是	是	0	0	0	0	0	0	0
75	1	9999	1	1.68	67	2	0	0	0	0	0	0	0	0	0	0	0	0	0	0	0	0	0	0	0	0	0	0	0	0	0	0	0	0	0	0	0	0	0	是	是	是	0	0	0	0	0	0	0
76	2	1	1	1.52	64	2	0	0	0	0	0	0	0	0	0	0	0	0	0	0	0	0	0	0	0	0	0	0	0	0	0	0	0	0	0	0	0	0	0	是	是	是	0	0	0	0	0	0	0
77	1	1	1	1.47	60	2	0	0	0	0	0	0	0	0	0	0	0	0	0	0	0	0	0	0	0	0	0	0	0	0	0	0	0	0	0	0	0	0	0	是	是	是	0	0	0	0	0	0	0
78	1	1	1	1.76	60	2	0	0	0	0	0	0	0	0	0	0	0	0	0	0	0	0	0	0	0	0	0	0	0	0	0	0	0	0	0	0	0	0	0	是	是	是	0	0	0	0	0	0	0
79	1	1	1	1.62	74.3	2	0	0	0	0	0	0	0	0	0	0	0	0	0	0	0	0	0	0	0	0	0	0	0	0	0	0	0	0	0	0	0	0	0	是	是	是	0	0	0	0	0	0	0
80	2	1	1	1.55	120	4	0	0	0	0	0	0	0	0	0	0	0	0	0	0	0	0	0	0	0	0	0	0	0	0	0	0	0	0	0	0	0	0	0	是	是	是	0	0	0	0	0	0	0
81	2	1	1	1.55	70.8	2	0	0	0	0	0	0	0	0	0	0	0	0	0	0	0	0	0	0	0	0	0	0	0	0	0	0	0	0	0	0	0	0	0	是	是	是	0	0	0	0	0	0	0
82	2	1	1	1.6	50	2	0	1	1	0	0	2	2	0	0	0	0	0	0	0	0	0	0	0	0	0	0	0	0	0	0	0	0	0	0	0	0	0	0	是	是	否	1	1	0	1	1	1	1
83	1	1	1	1.6	65	2	0	0	0	0	0	0	0	0	0	0	0	0	0	0	0	0	0	0	0	0	0	0	0	0	0	0	0	0	0	0	0	0	0	是	是	是	0	0	0	0	0	0	0
84	2	1	1	1.53	57.3	4	0	0	0	0	0	0	0	0	0	0	0	0	0	0	0	0	0	0	0	0	0	0	0	0	0	0	0	0	0	0	0	0	0	是	是	是	0	0	0	0	0	0	0
85	1	1	3	1.75	80	4	0	0	0	0	0	0	0	0	0	0	0	0	0	0	0	0	0		0	0	0	0	0	0	0	0	0	0	0	0	0	0	0	是	是	是	0	0	0	0	0	0	0
88	2	1	3	1.6	50	4	1	0	0	0	1	2	2	5	5	5	10	10	10	10	15	15	10	1	15	15	0	20	10	0	3	1	1	2	1	2	1	2	1	否	是	否	1	0	1	1	1	1	1
89	2	1	1	1.57	65	2	1	0	0	1	0	2	2	10	5	5	10	10	10	10	15	15	10	0	0	15	0	0	10	15	2	5	1	2	1	1	1	4	1	是	是	否	1	0	0	1	1	1	1
90	1	1	1	1.65	63	2	1	0	1	1	1	4	3	10	0	0	10	10	10	10	15	10	5	1	0	15	0	0	0	15	2	2	1	1	1	2	1	5	1	是	是	否	1	1	1	1	1	0	1
91	2	1	1	1.6	58	4	1	0	0	1	1	3	3	0	0	0	0	0	0	0	0	0	0	0	0	0	0	0	0	0	0	0	0	0	0	0	0	0	0	否	是	否	1	1	1	1	1	1	1
92	1	1	1	1.7	82	3	0	0	0	0	0	0	0	0	0	0	0	0	0	0	0	0	0	0	0	0	0	0	0	0	0	0	0	0	0	0	0	0	0	是	是	是	0	0	0	0	0	0	0
93	2	2	1	1.56	57	4	0	0	0	0	0	0	0	0	0	0	0	0	0	0	0	0	0	0	0	0	0	0	0	0	0	0	0	0	0	0	0	0	0	是	是	是	0	0	0	0	0	0	0
94	1	1	1	1.56	115	2	1	0	1	1	0	3	3	10	0	5	10	5	10	10	15	10	5	1	0	15	15	0	10	0	2	3	1	2	1	1	1	4	1	是	是	是	0	0	0	0	0	0	0
95	1	1	1	1.67	90	2	0	0	0	0	0	0	0	0	0	0	0	0	0	0	0	0	0	0	0	0	0	0	0	0	0	0	0	0	0	0	0	0	0	是	是	是	0	0	0	0	0	0	0
96	2	1	1	1.42	39.5	2	0	0	0	0	0	0	0	0	0	0	0	0	0	0	0	0	0	0	0	0	0	0	0	0	0	0	0	0	0	0	0	0	0	是	是	是	0	0	0	0	0	0	0
97	1	1	1	1.65	96.2	2	1	0	0	0	0	1	1	0	0	0	0	0	0	0	0	0	0	0	0	0	0	0	0	0	0	0	0	0	0	0	0	0	0	是	是	是	0	0	0	0	0	0	0
98	2	1	1	1.52	62.3	2	1	1	1	0	0	3	3	0	0	0	0	0	0	0	0	0	0	4	0	0	15	0	20	15	3	3	0	0	0	1	2	3	2	否	否	否	1	0	0	0	0	0	0
99	2	1	1	1.6	50	2	0	0	0	0	0	0	0	0	0	0	0	0	0	0	0	0	0	0	0	0	0	0	0	0	0	0	0	0	0	0	0	0	0	是	是	是	0	0	0	0	0	0	0
101	1	1	1	1.7	80	2	1	0	0	0	0	1	1	0	0	0	0	0	0	0	0	0	0	0	0	0	0	0	0	0	0	0	0	0	0	0	0	0	0	是	否	是	1	0	0	0	0	0	0
102	1	1	1	1.68	70	2	1	1	1	1	1	5	3	0	0	0	0	5	5	0	5	5	0	0	15	15	15	20	0	0	3	5	1	0	0	1	1	3	2	否	是	否	1	0	0	1	1	1	1
103	2	1	1	1.55	75	2	0	0	0	0	0	0	0	0	0	0	0	0	0	0	0	0	0	0	0	0	0	0	0	0	0	0	0	0	0	0	0	0	0	是	是	是	0	0	0	0	0	0	0
104	2	1	3	1.52	44	2	1	0	0	0	0	1	1	10	5	5	10	10	10	10	15	15	10	0	0	0	0	0	0	0	0	0	2	2	2	2	2	4	1	是	是	是	0	0	0	0	0	0	0
105	2	1	1	1.62	75	2	1	1	1	0	1	4	3	5	0	0	5	10	10	10	5	10	0	2	0	0	15	0	20	0	2	0	1	1	1	2	2	4	1	是	是	是	0	0	0	0	0	0	0
106	1	1	3	163	60	4	0	1	0	1	1	3	3	10	0	0	5	10	10	10	15	15	0	1	0	15	0	0	0	0	1	0	2	1	1	2	2	4	1	是	是	否	1	1	1	1	1	1	1
107	1	1	3	172	70	4	0	1	1	0	0	2	2	0	0	0	0	0	0	0	0	0	0	0	0	0	0	0	0	0	0	0	0	0	0	0	0	0	0	否	否	否	1	0	0	0	1	0	1
108	1	1	3	160	60	4	0	1	0	0	0	1	1	0	0	0	0	0	0	0	0	0	0	0	0	0	0	0	0	0	0	0	0	0	0	0	0	0	0	是	否	否	1	0	0	0	0	0	0
109	1	1	3	170	70	4	0	0	0	0	0	0	0	0	0	0	0	0	0	0	0	0	0	0	0	0	0	0	0	0	0	0	0	0	0	0	0	0	0	否	否	否	1	0	0	0	0	0	0
110	1	1	1	1.7	65	2	0	0	0	0	0	0	0	0	0	0	0	0	0	0	0	0	0	0	0	0	0	0	0	0	0	0	0	0	0	0	0	0	0	是	是	是	0	0	0	0	0	0	0
111	1	1	1	1.6	60	2	0	0	0	1	0	1	1	0	0	0	0	0	0	0	0	0	0	0	0	0	0	0	0	0	0	0	0	0	0	0	0	0	0	是	是	是	0	0	0	0	0	0	0
112	2	1	1	1.53	60	2	1	0	0	0	0	1	1	0	0	0	0	0	0	0	0	0	0	0	0	0	0	0	0	0	0	0	0	0	0	0	0	0	0	是	是	是	0	0	0	0	0	0	0
113	2	1	3	158	60	4	0	1	1	0	0	2	2	0	0	0	0	0	0	0	0	0	0	4	0	0	0	0	0	0	0	2	0	0	0	2	2	4	1	否	否	否	1	0	0	0	0	0	0
114	1	1	3	160	65	4	0	1	1	1	0	3	3	0	0	0	0	0	0	0	0	0	0	4	0	15	0	0	0	0	1	0	0	0	0	2	2	4	1	否	否	否	1	0	0	0	0	0	0
115	2	1	1	1.55	54	4	0	0	0	1	0	1	1	0	0	0	0	0	0	0	0	0	0	0	0	0	0	0	0	0	0	0	0	0	0	0	0	0	0	是	是	是	0	0	0	0	0	0	0
116	2	1	3	160	65	3	0	1	1	0	0	2	2	0	0	0	0	0	0	0	0	0	0	4	0	0	0	0	0	0	0	0	0	0	0	2	2	4	1	否	否	否	1	0	0	0	0	0	0
117	2	1	3	155	50	4	0	1	1	0	0	2	2	0	0	0	0	0	0	0	0	0	0	0	0	0	0	0	0	0	0	0	0	0	0	0	0	0	0	否	否	否	1	0	0	0	0	0	0
118	1	1	3	168	70	2	0	0	0	0	0	0	0	0	0	0	0	0	0	0	0	0	0	0	0	0	0	0	0	0	0	0	0	0	0	0	0	0	0	否	是	否	1	1	1	1	1	1	1
119	2	1	3	148	40	4	0	1	1	0	0	2	2	0	0	0	0	0	0	0	0	0	0	0	0	0	0	0	0	0	0	0	0	0	0	0	0	0	0	否	否	否	1	0	0	0	0	0	0
120	1	1	3	170	63	4	0	0	0	0	0	0	0	0	0	0	0	0	0	0	0	0	0	0	0	0	0	0	0	0	0	0	0	0	0	0	0	0	0	是	是	是	0	0	0	0	0	0	0
121	2	1	3	155	60	4	0	0	0	0	0	0	0	0	0	0	0	0	0	0	0	0	0	0	0	0	0	0	0	0	0	0	0	0	0	0	0	0	0	否	否	否	0	0	0	0	0	0	0
122	2	1	3	155	60	3	0	1	1	0	0	2	2	0	0	0	0	0	0	0	0	0	0	4	0	15	0	0	0	0	1	0	0	0	0	2	2	4	1	否	否	否	0	0	0	0	0	0	0
123	2	1	1	1.5	55	2	0	1	1	1	1	4	3	10	0	5	10	10	10	10	15	5	0	1	0	15	15	0	20	0	3	2	1	1	1	1	1	3	1	是	是	是	0	0	0	0	0	0	0
124	1	1	3	165	65	4	0	1	1	0	0	2	2	0	0	0	0	0	0	0	0	0	0	0	0	0	0	0	0	0	0	0	0	0	0	0	0	0	0	否	是	是	1	0	0	0	0	0	0
125	1	1	3	170	70	4	0	1	1	0	0	2	2	0	0	0	0	0	0	0	0	0	0	0	0	0	0	0	0	0	0	0	0	0	0	0	0	0	0	否	是	否	1	0	0	0	1	0	1
126	2	1	3	155	60	4	0	1	1	0	0	2	2	5	0	0	5	10	5	5	15	15	0	2	0	15	0	0	10	0	1	0	1	1	2	2	2	4	1	否	是	否	1	0	0	0	1	0	1
127	2	1	3	155	50	4	0	1	1	0	0	2	2	0	0	0	0	0	0	0	0	0	0	4	0	15	0	0	0	0	1	0	0	0	0	2	1	4	2	否	否	否	1	0	0	0	0	0	0
128	1	1	3	158	55	4	0	1	1	0	0	2	2	0	0	0	0	0	0	0	0	0	0	4	0	0	0	0	0	0	0	2	0	0	0	2	2	4	1	否	否	否	1	0	0	0	0	0	0
129	2	1	1	1.52	50	4	0	0	0	0	0	0	0	0	0	0	0	0	0	0	0	0	0	0	0	0	0	0	0	0	0	0	0	0	0	0	0	0	0	是	否	是	0	0	0	0	0	0	0
130	2	1	1	1.65	68	2	0	0	0	0	0	0	0	0	0	0	0	0	0	0	0	0	0	0	0	0	0	0	0	0	0	0	0	0	0	0	0	0	0	是	是	是	0	0	0	0	0	0	0
131	1	1	1	1.65	58	2	1	0	0	0	0	1	1	0	0	0	0	0	0	0	0	0	0	0	0	0	0	0	0	0	0	0	0	0	0	0	0	0	0	是	是	是	0	0	0	0	0	0	0
132	2	1	1	1.56	43	2	1	1	1	0	0	3	3	0	0	0	0	0	0	0	0	0	0	0	0	0	0	0	0	0	0	0	0	0	0	0	0	0	0	是	是	是	0	0	0	0	0	0	0
133	1	1	1	1.74	50	2	1	0	0	0	1	2	2	0	0	0	0	0	0	0	0	0	0	0	0	0	0	0	0	0	0	0	0	0	0	0	0	0	0	否	是	否	1	1	1	1	1	1	1
134	1	1	2	1.63	66	2	0	0	0	0	0	0	0	0	0	0	0	0	0	0	0	0	0	0	0	0	0	0	0	0	0	0	0	0	0	0	0	0	0	是	是	是	0	0	0	0	0	0	0
135	2	1	2	1.5	67	2	0	0	0	0	0	0	0	0	0	0	0	0	0	0	0	0	0	0	0	0	0	0	0	0	0	0	0	0	0	0	0	0	0	是	是	是	0	0	0	0	0	0	0
136	1	1	1	1.76	60	2	0	0	0	0	0	0	0	0	0	0	0	0	0	0	0	0	0	0	0	0	0	0	0	0	0	0	0	0	0	0	0	0	0	是	是	是	0	0	0	0	0	0	0
137	2	1	1	1.56	72	4	0	0	1	1	0	2	2	5	0	0	10	10	10	10	15	10	0	1	0	15	15	0	20	0	3	2	1	1	1	1	2	4	1	是	是	是	0	0	0	0	0	0	0
138	1	1	1	1.7	80	4	0	0	0	0	0	0	0	0	0	0	0	0	0	0	0	0	0	0	0	0	0	0	0	0	0	0	0	0	0	0	0	0	0	是	是	是	0	0	0	0	0	0	0
140	2	1	1	1.75	55	4	1	1	1	1	1	5	3	5	0	0	0	5	5	0	0	0	0	4	0	15	0	0	10	0	2	2	1	0	1	0	2	4	1	是	是	否	0	1	1	1	1	1	1
141	1	1	1	1.7	60	4	0	0	0	0	0	0	0	0	0	0	0	0	0	0	0	0	0	0	0	0	0	0	0	0	0	0	0	0	0	0	0	0	0	是	是	是	0	0	0	0	0	0	0
142	1	1	1	1.68	70	2	0	0	0	0	0	0	0	0	0	0	0	0	0	0	0	0	0	0	0	0	0	0	0	0	0	0	0	0	0	0	0	0	0	是	是	是	0	0	0	0	0	0	0
143	2	1	1	1.53	60	2	0	1	0	0	0	1	1	0	0	0	0	0	0	0	0	0	0	0	0	0	0	0	0	0	0	0	0	0	0	0	0	0	0	是	是	是	0	0	0	0	0	0	0
144	2	1	1	1.63	77	2	0	0	0	0	0	0	0	0	0	0	0	0	0	0	0	0	0	0	0	0	0	0	0	0	0	0	0	0	0	0	0	0	0	是	是	是	0	0	0	0	0	0	0
145	2	1	1	1.52	65	2	0	0	0	0	0	0	0	0	0	0	0	0	0	0	0	0	0	0	0	0	0	0	0	0	0	0	0	0	0	0	0	0	0	是	是	是	0	0	0	0	0	0	0
146	2	9999	9999	150	125	4	1	0	0	1	1	3	3	0	0	0	0	0	0	0	0	0	0	0	0	0	0	0	0	0	0	0	0	0	0	0	0	0	0	9999	9999	9999	0	0	0	0	0	0	0
147	2	1	1	1.53	65	2	0	0	0	0	0	0	0	0	0	0	0	0	0	0	0	0	0	0	0	0	0	0	0	0	0	0	0	0	0	0	0	0	0	是	是	是	0	0	0	0	0	0	0
148	2	1	1	1.53	65	2	1	1	1	1	0	4	3	5	0	0	5	10	10	10	10	10	0	2	0	15	15	0	10	0	2	2	1	1	1	2	2	3	1	否	是	否	0	1	1	1	1	1	1
149	2	1	1	1.52	65	4	0	1	1	0	0	2	2	10	0	0	10	10	10	10	15	10	10	1	0	15	15	0	0	0	2	0	1	1	2	2	2	5	1	是	是	是	0	0	0	0	0	0	0
150	2	1	1	1.5	64	2	0	0	0	0	0	0	0	0	0	0	0	0	0	0	0	0	0	0	0	0	0	0	0	0	0	0	0	0	0	0	0	0	0	是	是	是	0	0	0	0	0	0	0
151	2	1	1	1.54	62	4	0	0	0	0	0	0	0	0	0	0	0	0	0	0	0	0	0	0	0	0	0	0	0	0	0	0	0	0	0	0	0	0	0	是	是	是	0	0	0	0	0	0	0
152	1	1	1	1.58	55	4	0	1	0	0	0	1	1	0	0	0	0	0	0	0	0	0	0	0	0	0	0	0	0	0	0	0	0	0	0	0	0	0	0	是	是	是	0	0	0	0	0	0	0
153	1	1	1	1.73	83	2	0	0	0	0	0	0	0	0	0	0	0	0	0	0	0	0	0	0	0	0	0	0	0	0	0	0	0	0	0	0	0	0	0	是	是	是	0	0	0	0	0	0	0
154	1	1	1	1.6	55	4	0	1	0	0	0	1	1	0	0	0	0	0	0	0	0	0	0	0	0	0	0	0	0	0	0	0	0	0	0	0	0	0	0	是	是	是	0	0	0	0	0	0	0
155	2	1	1	1.67	76	2	0	0	0	0	0	0	0	0	0	0	0	0	0	0	0	0	0	0	0	0	0	0	0	0	0	0	0	0	0	0	0	0	0	是	是	是	0	0	0	0	0	0	0
156	1	1	1	1.72	70	3	0	0	0	0	0	0	0	0	0	0	0	0	0	0	0	0	0	0	0	0	0	0	0	0	0	0	0	0	0	0	0	0	0	是	是	是	0	0	0	0	0	0	0
157	2	1	1	1.62	75	2	0	1	0	0	0	1	1	0	0	0	0	0	0	0	0	0	0	0	0	0	0	0	0	0	0	0	0	0	0	0	0	0	0	是	是	是	0	0	0	0	0	0	0
158	2	1	1	1.5	72	4	0	1	1	1	0	3	3	10	5	5	10	5	10	10	15	15	10	1	0	15	15	20	0	0	3	4	2	2	2	1	2	5	1	是	是	是	0	0	0	0	0	0	0
159	2	1	1	1.53	56	2	0	1	1	0	0	2	2	5	0	0	5	10	10	10	15	15	5	1	0	15	15	0	10	0	2	0	1	1	1	2	2	4	1	否	是	否	0	1	1	1	1	1	1
160	2	1	1	1.53	57	4	0	0	0	0	0	0	0	0	0	0	0	0	0	0	0	0	0	0	0	0	0	0	0	0	0	0	0	0	0	0	0	0	0	是	是	是	0	0	0	0	0	0	0
161	2	1	1	1.5	79	2	0	0	1	0	0	1	1	0	0	0	0	0	0	0	0	0	0	0	0	0	0	0	0	0	0	0	0	0	0	0	0	0	0	是	是	是	0	0	0	0	0	0	0
162	2	1	1	1.5	79	2	0	0	1	0	0	1	1	0	0	0	0	0	0	0	0	0	0	0	0	0	0	0	0	0	0	0	0	0	0	0	0	0	0	是	是	是	0	0	0	0	0	0	0
163	1	1	1	1.6	62	2	0	0	0	0	1	1	1	0	0	0	0	0	0	0	0	0	0	0	0	0	0	0	0	0	0	0	0	0	0	0	0	0	0	是	是	是	0	0	0	0	0	0	0
164	2	1	1	1.58	70.2	2	0	0	0	0	0	0	0	0	0	0	0	0	0	0	0	0	0	0	0	0	0	0	0	0	0	0	0	0	0	0	0	0	0	是	是	是	0	0	0	0	0	0	0
165	1	1	1	1.66	74.5	2	0	0	0	0	0	0	0	0	0	0	0	0	0	0	0	0	0	0	0	0	0	0	0	0	0	0	0	0	0	0	0	0	0	是	是	是	0	0	0	0	0	0	0
166	1	1	1	1.65	60.7	4	0	0	0	0	1	1	1	0	0	0	0	0	0	0	0	0	0	0	0	0	0	0	0	0	0	0	0	0	0	0	0	0	0	是	是	是	0	0	0	0	0	0	0
167	2	1	1	1.5	90	4	0	0	0	0	0	0	0	0	0	0	0	0	0	0	0	0	0	0	0	0	0	0	0	0	0	0	0	0	0	0	0	0	0	否	是	是	0	0	0	0	0	0	0
168	1	1	1	1.82	90	2	1	0	0	0	0	1	1	0	0	0	0	0	0	0	0	0	0	0	0	0	0	0	0	0	0	0	0	0	0	0	0	0	0	9999	9999	9999	0	0	0	0	0	0	0
169	1	1	1	1.82	80	2	1	0	0	0	0	1	1	0	0	0	0	0	0	0	0	0	0	0	0	0	0	0	0	0	0	0	0	0	0	0	0	0	0	是	是	是	0	0	0	0	0	0	0
172	2	1	1	1.58	58	4	0	0	0	0	0	0	0	0	0	0	0	0	0	0	0	0	0	0	0	0	0	0	0	0	0	0	0	0	0	0	0	0	0	9999	9999	9999	0	0	0	0	0	0	0
173	2	1	1	1.55	36	4	1	1	0	0	0	2	2	0	0	0	0	0	0	0	0	0	0	0	0	0	0	0	0	0	0	0	0	0	0	0	0	0	0	否	是	是	0	0	0	0	0	0	0
174	2	1	1	1.55	52	4	1	0	1	0	0	2	2	10	5	5	10	10	10	10	15	15	10	0	0	15	15	0	10	0	2	3	1	2	1	1	2	5	0	是	是	是	0	0	0	0	0	0	0
175	1	1	3	1.7	65	2	0	0	0	0	1	1	1	0	0	0	0	0	0	0	0	0	0	0	0	0	0	0	0	0	0	0	0	0	0	0	0	0	0	9999	是	是	0	0	0	0	0	0	0
176	2	1	1	1.6	72	4	0	0	0	0	0	0	0	0	0	0	0	0	0	0	0	0	0	0	0	0	0	0	0	0	0	0	0	0	0	0	0	0	0	是	是	是	0	0	0	0	0	0	0
177	1	1	3	1.65	55	4	0	0	0	0	1	1	1	10	5	5	10	10	10	10	15	15	10	0	0	15	0	0	0	0	1	0	2	2	2	2	2	5	1	是	是	是	0	0	0	0	0	0	0
178	1	1	3	1.57	60	4	0	0	0	0	0	0	0	0	0	0	0	0	0	0	0	0	0	0	0	0	0	0	0	0	0	0	0	0	0	0	0	0	0	否	否	否	1	0	0	0	0	0	0
179	1	1	3	1.54	70	4	0	1	1	0	0	2	2	10	0	0	0	0	5	0	0	0	0	4	0	15	0	20	0	0	2	0	0	0	1	2	2	4	1	否	否	否	1	0	0	0	0	0	0
180	2	1	3	1.5	75	4	0	1	1	0	0	2	2	0	0	0	0	0	0	0	0	0	0	0	0	0	0	0	0	0	0	0	0	0	0	0	0	0	0	否	否	否	1	0	0	0	0	0	0
181	2	1	3	1.6	75	2	0	1	1	0	0	2	2	0	0	0	0	0	0	0	0	0	0	0	0	0	0	0	0	0	0	0	0	0	0	0	0	0	0	否	否	否	1	0	0	0	0	0	0
182	1	1	3	1.54	55	4	0	1	1	0	0	2	2	0	0	0	0	0	0	0	0	0	0	0	0	0	0	0	0	0	0	0	0	0	0	0	0	0	0	否	否	否	1	0	0	0	0	0	0
183	2	1	1	1.56	45	2	1	1	1	1	0	4	3	0	0	0	10	0	10	10	10	5	0	2	15	15	15	0	20	0	3	3	1	1	1	1	1	4	1	是	是	是	0	0	0	0	0	0	0
184	1	1	3	1.4	50	4	1	1	1	0	1	4	3	0	0	0	0	0	0	0	0	0	0	4	0	15	0	20	0	0	2	5	0	0	0	1	0	3	2	否	否	否	1	0	0	0	0	1	1
185	1	1	1	1.73	70	2	0	0	0	0	0	0	0	0	0	0	0	0	0	0	0	0	0	0	0	0	0	0	0	0	0	0	0	0	0	0	0	0	0	是	是	是	0	0	0	0	0	0	0
186	2	1	1	1.62	68	2	0	1	0	0	0	1	1	0	0	0	0	0	0	0	0	0	0	0	0	0	0	0	0	0	0	0	0	0	0	0	0	0	0	是	是	是	0	0	0	0	0	0	0
187	1	1	3	1.57	52	1	0	0	0	0	0	0	0	0	0	0	0	0	0	0	0	0	0	0	0	0	0	0	0	0	0	0	0	0	0	0	0	0	0	否	是	否	1	0	0	1	1	1	1
188	1	1	3	1.58	53	2	1	0	0	0	0	1	1	0	0	0	0	0	0	0	0	0	0	0	0	0	0	0	0	0	0	0	0	0	0	0	0	0	0	是	是	是	0	0	0	0	0	0	0
189	2	1	3	1.5	55	2	1	0	0	0	0	1	1	0	0	0	0	0	0	0	0	0	0	0	0	0	0	0	0	0	0	0	0	0	0	0	0	0	0	否	是	否	1	1	1	1	1	1	1
190	2	1	3	1.58	45	4	1	1	1	0	0	3	3	10	0	0	0	10	10	0	5	5	0	3	0	15	15	0	10	0	2	5	0	0	0	1	1	3	2	否	否	否	1	0	0	0	0	0	0
191	2	1	3	1.4	74	4	0	1	1	0	0	2	2	0	0	0	0	0	0	0	0	0	0	0	0	0	0	0	0	0	0	0	0	0	0	0	0	0	0	否	否	否	1	0	0	0	0	0	0
192	1	1	3	1.58	51	4	0	1	1	0	0	2	2	0	0	0	0	0	0	0	0	0	0	0	0	0	0	0	0	0	0	0	0	0	0	0	0	0	0	否	否	否	1	0	0	0	0	0	1
193	1	1	3	1.6	72	4	0	1	1	0	0	2	2	0	0	0	0	0	0	0	0	0	0	0	0	0	0	0	0	0	0	0	0	0	0	0	0	0	0	否	是	否	1	1	1	1	1	1	1
194	1	9999	3	1.52	64	4	1	0	0	0	0	1	1	0	0	0	0	0	0	0	0	0	0	0	0	0	0	0	0	0	0	0	0	0	0	0	0	0	0	9999	否	否	1	0	0	0	0	0	1
195	1	1	3	1.66	68	4	0	0	0	0	0	0	0	0	0	0	0	0	0	0	0	0	0	0	0	0	0	0	0	0	0	0	0	0	0	0	0	0	0	是	是	是	0	0	0	0	0	0	0
196	2	1	3	1.52	56	4	0	0	0	0	0	0	0	0	0	0	0	0	0	0	0	0	0	0	0	0	0	0	0	0	0	0	0	0	0	0	0	0	0	否	否	否	1	0	0	0	0	1	1
197	2	1	3	1.4	50	4	0	1	1	0	0	2	2	0	0	0	0	0	0	0	0	0	0	0	0	0	0	0	0	0	0	0	0	0	0	0	0	0	0	是	是	是	0	0	0	0	0	0	0
198	1	1	3	1.58	67	4	0	0	0	0	0	0	0	0	0	0	0	0	0	0	0	0	0	0	0	0	0	0	0	0	0	0	0	0	0	0	0	0	0	是	是	是	0	0	0	0	0	0	0
199	1	1	6	1.7	70	2	0	1	1	0	0	2	2	0	0	0	0	0	0	0	0	0	0	0	0	0	0	0	0	15	1	0	0	0	0	2	2	4	1	否	否	否	0	0	0	0	0	0	0
200	2	1	6	1.6	65	4	0	1	0	0	0	1	1	0	0	0	0	0	0	0	0	0	0	0	0	0	0	0	0	0	0	0	0	0	0	0	0	0	0	是	是	是	0	0	0	0	0	0	0
201	1	1	1	1.73	76	2	0	0	0	0	0	0	0	0	0	0	0	0	0	0	0	0	0	0	0	0	0	0	0	0	0	0	0	0	0	0	0	0	0	是	是	是	0	0	0	0	0	0	0
202	2	1	1	1.56	55	4	1	0	1	1	0	3	3	5	0	5	5	10	10	10	15	15	0	1	15	15	15	20	10	0	3	10	1	0	1	0	0	1	2	是	是	是	1	0	0	0	0	0	0
203	1	1	1	1.6	58	2	0	0	0	0	0	0	0	0	0	0	0	0	0	0	0	0	0	0	0	0	0	0	0	0	0	0	0	0	0	0	0	0	0	9999	是	是	0	0	0	0	0	0	0
204	2	1	2	1.37	42.5	4	1	1	1	0	0	3	3	0	0	0	10	10	10	10	15	5	0	2	15	15	30	0	10	0	3	5	1	1	1	1	0	3	2	9999	否	否	1	0	0	0	0	0	0
205	2	1	1	1.64	68	4	1	0	0	1	0	2	2	10	5	0	10	10	10	10	10	10	5	1	0	15	15	0	10	0	1	3	1	2	1	1	1	4	1	是	是	否	1	0	1	1	1	1	1
206	2	1	2	1.53	32	2	0	1	1	0	0	2	2	0	0	0	0	0	0	0	0	0	0	0	0	0	0	0	0	0	0	0	0	0	0	0	0	0	0	是	是	是	0	0	0	0	0	0	0
207	1	1	1	1.7	70	2	0	0	0	0	1	1	1	0	0	0	0	0	0	0	0	0	0	1	0	0	0	0	0	0	1	0	0	0	0	0	0	0	1	是	是	否	1	1	0	1	1	1	1
208	2	1	2	1.62	55	4	1	0	0	0	1	2	2	10	5	5	10	10	10	10	15	15	10	0	0	15	15	0	10	0	1	2	1	2	1	1	2	4	1	是	是	是	0	0	0	0	0	0	0
209	2	1	1	1.5	70	2	1	0	0	1	0	2	2	10	5	5	10	10	10	10	15	15	10	0	0	15	0	0	0	0	0	2	2	2	2	2	1	4	1	是	是	是	0	0	0	0	0	0	0
210	2	1	1	1.55	80	2	1	1	1	1	0	4	3	0	0	0	5	0	0	0	0	0	0	4	15	15	0	0	20	0	3	3	1	0	0	1	1	4	2	是	是	9999	0	0	0	0	0	0	0
211	1	1	1	1.65	70	2	1	0	0	0	0	1	1	0	0	0	0	0	0	0	0	0	0	0	0	0	0	0	0	0	0	0	0	0	0	0	0	0	0	是	是	是	0	0	0	0	0	0	0
212	2	1	1	1.6	60	2	0	0	0	0	0	0	0	0	0	0	0	0	0	0	0	0	0	0	0	0	0	0	0	0	0	0	0	0	0	0	0	0	0	是	是	是	0	0	0	0	0	0	0
215	1	1	1	1.8	70	2	1	0	0	1	1	3	3	0	5	0	10	10	10	10	15	15	5	1	0	0	0	0	0	0	0	0	1	1	1	0	1	5	1	否	否	是	1	0	0	0	0	0	0
216	2	1	1	1.6	70	2	1	1	1	1	1	5	3	0	0	0	0	0	0	0	0	0	0	4	15	15	15	20	20	15	3	9	0	0	0	0	1	4	2	否	否	否	1	1	1	1	0	1	0
218	1	1	1	1.8	85	2	0	0	0	0	0	0	0	0	0	0	0	0	0	0	0	0	0	0	0	0	0	0	0	0	0	0	0	0	0	0	0	0	0	是	是	是	0	0	0	0	0	0	0
219	1	1	1	1.74	65	2	0	0	0	0	0	0	0	0	0	0	0	0	0	0	0	0	0	0	0	0	0	0	0	0	0	0	0	0	0	0	0	0	0	是	是	是	0	0	0	0	0	0	0
220	1	1	1	1.68	70	2	0	0	0	0	0	0	0	0	0	0	0	0	0	0	0	0	0	0	0	0	0	0	0	0	0	0	0	0	0	0	0	0	0	是	是	是	0	0	0	0	0	0	0
221	2	1	1	1.63	55	2	1	0	0	0	0	1	1	0	0	0	0	0	0	0	0	0	0	0	0	0	0	0	0	0	0	0	0	0	0	0	0	0	0	是	是	是	0	0	0	0	0	0	0
222	1	1	1	1.76	73	2	0	0	0	0	0	0	0	0	0	0	0	0	0	0	0	0	0	0	0	0	0	0	0	0	0	0	0	0	0	0	0	0	0	9999	9999	9999	0	0	0	0	0	0	0
223	2	1	1	1.6	65	2	0	0	0	1	0	1	1	0	0	0	0	0	0	0	0	0	0	0	0	0	0	0	0	0	0	0	0	0	0	0	0	0	0	9999	9999	9999	0	0	0	0	0	0	0
224	2	1	1	1.68	60	2	1	1	1	0	1	4	3	10	0	0	10	10	10	10	15	15	5	1	15	15	15	0	10	0	3	5	1	1	1	1	2	4	1	否	否	否	1	1	1	1	1	1	1
225	2	1	1	1.6	50	2	0	1	1	0	0	2	2	5	0	5	10	10	10	10	15	10	0	1	0	0	15	0	10	0	1	1	1	1	1	2	2	4	1	否	否	否	1	1	1	1	1	1	1
226	1	1	2	1.68	50	4	1	1	1	0	0	3	3	10	0	0	10	5	10	5	15	10	0	1	0	0	15	0	10	15	2	0	1	1	1	2	2	4	1	否	否	否	1	0	0	0	0	0	0
228	1	1	1	1.74	140	2	0	0	1	0	0	1	1	10	5	5	10	10	10	10	15	15	10	0	0	15	15	20	0	0	3	0	1	2	2	2	2	5	1	是	是	是	0	0	0	0	0	0	0
229	2	1	1	1.57	51	2	0	1	1	1	0	3	3	0	0	0	0	0	0	0	0	0	0	0	0	0	0	0	0	0	0	0	0	0	0	0	0	0	0	是	是	否	1	1	1	1	1	0	1
230	1	1	1	1.7	75	4	1	0	1	0	0	2	1	10	5	5	10	10	10	10	15	15	5	1	0	15	15	0	10	0	1	0	1	2	2	2	2	5	1	否	是	否	1	1	1	1	1	1	1
231	2	1	1	1.6	50	2	0	1	1	0	0	2	2	10	0	5	10	10	10	10	15	15	0	1	0	0	15	0	20	0	1	0	1	1	1	2	2	4	1	否	否	否	1	0	0	0	0	0	0
232	1	1	1	1.65	60	2	1	1	0	1	0	3	3	10	0	0	10	10	10	10	15	15	5	1	0	15	15	0	10	0	2	0	1	2	1	2	2	4	1	是	是	是	0	0	0	0	0	0	0
233	1	1	1	1.65	69	2	1	0	0	1	1	3	3	10	5	5	5	10	10	10	15	15	5	1	0	15	0	20	0	0	2	0	2	2	2	2	2	4	1	是	是	是	0	0	0	0	0	0	0
234	2	1	1	1.48	55	2	0	0	0	0	0	0	0	0	0	0	0	0	0	0	0	0	0	0	0	0	0	0	0	0	0	0	0	0	0	0	0	0	0	是	是	否	1	1	0	1	1	1	1
236	1	1	1	1.7	65	2	1	0	0	0	1	2	2	0	0	0	0	0	0	0	0	0	0	0	0	0	0	0	0	0	0	0	0	0	0	0	0	0	0	是	是	是	0	0	0	0	0	0	0
237	2	1	2	1.6	40	4	1	1	0	0	1	3	3	10	0	5	10	10	10	10	15	15	10	1	0	0	0	0	0	0	0	0	2	0	2	2	2	4	0	是	是	是	0	0	0	0	0	0	0
238	1	1	1	1.67	60	2	0	0	0	0	0	0	0	0	0	0	0	0	0	0	0	0	0	0	0	0	0	0	0	0	0	0	0	0	0	0	0	0	0	是	是	是	0	0	0	0	0	0	0
239	1	1	1	1.75	85	4	0	0	0	0	0	0	0	0	0	0	0	0	0	0	0	0	0	0	0	0	0	0	0	0	0	0	0	0	0	0	0	0	0	是	是	是	0	0	0	0	0	0	0
240	1	1	1	1.72	71	4	1	0	0	0	0	1	1	10	5	5	10	10	10	10	15	15	5	1	15	0	0	0	10	0	2	0	1	2	1	2	2	4	1	是	是	是	0	0	0	0	0	0	0
241	2	1	1	1.55	41	4	0	0	0	0	0	0	0	0	0	0	0	0	0	0	0	0	0	0	0	0	0	0	0	0	0	0	0	0	0	0	0	0	0	是	是	是	0	0	0	0	0	0	0
242	2	1	1	1.5	45	4	1	1	0	1	0	3	3	0	0	0	0	0	0	0	0	0	0	0	0	0	0	0	0	0	0	0	0	0	0	0	0	0	0	是	是	是	0	0	0	0	0	0	0
243	2	1	2	1.55	50	2	0	0	0	0	0	0	0	0	0	0	0	0	0	0	0	0	0	0	0	0	0	0	0	0	0	0	0	0	0	0	0	0	0	是	是	是	0	0	0	0	0	0	0
244	1	1	2	170	80	1	0	0	0	0	0	0	0	0	0	0	0	0	0	0	0	0	0	0	0	0	0	0	0	0	0	0	0	0	0	0	0	0	0	是	是	否	1	1	0	1	1	1	1
245	1	1	2	1.7	70	3	0	0	0	0	0	0	0	0	0	0	0	0	0	0	0	0	0	0	0	0	0	0	0	0	0	0	0	0	0	0	0	0	0	否	否	否	1	0	0	1	1	1	1
246	1	1	2	1.75	70	4	0	0	0	0	0	0	0	0	0	0	0	0	0	0	0	0	0	0	0	0	0	0	0	0	0	0	0	0	0	0	0	0	0	否	否	否	1	0	0	0	0	0	1
247	2	1	2	1.6	90	4	0	1	0	0	0	1	1	0	0	0	0	0	0	0	0	0	0	0	0	0	0	0	0	0	0	0	0	0	0	0	0	0	0	是	否	否	1	0	0	1	1	1	1
248	1	1	2	1.6	60	4	0	0	0	1	0	1	1	0	0	0	0	0	0	0	0	0	0	0	0	0	0	0	0	0	0	0	0	0	0	0	0	0	0	是	是	否	1	1	0	1	1	1	1
249	1	1	2	1.73	70	4	0	1	0	0	0	1	1	0	0	0	0	0	0	0	0	0	0	0	0	0	0	0	0	0	0	0	0	0	0	0	0	0	0	否	是	否	1	1	1	1	1	1	1
250	1	1	2	1.6	80	1	0	0	0	0	0	0	0	10	5	5	10	10	10	10	15	10	10	1	0	15	0	0	0	15	2	2	2	2	2	0	2	4	1	是	否	否	1	0	0	1	1	1	1
251	1	1	2	1.75	70	2	1	1	1	0	0	3	3	0	0	0	0	0	0	0	0	0	0	4	0	15	0	0	20	0	2	2	1	0	0	1	2	3	2	是	否	否	1	0	0	0	0	1	1
252	2	1	2	1.6	60	4	0	1	0	0	0	1	1	0	0	0	0	0	0	0	0	0	0	0	0	0	0	0	0	0	0	0	0	0	0	0	0	0	0	是	是	否	1	1	0	1	1	1	1
253	1	9999	2	175	75	4	0	0	0	0	0	0	0	0	0	0	0	0	0	0	0	0	0	0	0	0	0	0	0	0	0	0	0	0	0	0	0	0	0	是	否	否	1	0	1	1	1	1	1
254	1	1	2	1.68	56	4	0	0	0	0	0	0	0	0	0	0	0	0	0	0	0	0	0	0	0	0	0	0	0	0	0	0	0	0	0	0	0	0	0	是	否	否	1	0	0	0	1	0	1
255	2	1	2	1.57	50	4	1	0	0	0	0	1	1	0	0	0	0	0	0	0	0	0	0	0	0	0	0	0	0	0	0	0	0	0	0	0	0	0	0	是	是	否	1	0	1	1	1	1	1
256	2	1	2	1.65	65	4	0	0	0	0	0	0	0	0	0	0	0	0	0	0	0	0	0	0	0	0	0	0	0	0	0	0	0	0	0	0	0	0	0	否	是	否	1	1	1	1	0	1	1
257	2	1	2	1.5	60	1	0	1	1	0	0	2	2	5	0	0	0	0	0	0	0	10	0	4	0	0	15	0	0	0	1	2	1	0	1	1	2	4	1	是	否	否	1	0	0	0	0	1	1
258	1	1	2	1.74	70	4	0	0	0	0	0	0	0	0	0	0	0	0	0	0	0	0	0	0	0	0	0	0	0	0	0	0	0	0	0	0	0	0	0	否	否	否	1	0	0	0	0	0	0
259	2	1	2	1.55	50	4	0	1	1	0	0	2	2	5	0	0	0	0	0	0	0	0	0	4	0	15	0	0	0	15	2	5	1	0	0	1	2	4	1	否	否	否	1	0	0	0	1	0	0
260	2	1	2	1.6	60	4	0	0	0	0	0	0	0	0	0	0	0	0	0	5	10	10	0	3	0	15	0	0	10	15	2	0	1	0	1	2	0	1	2	否	否	否	1	0	0	0	0	0	0
261	1	1	1	1.67	60	2	0	0	0	0	0	0	0	0	0	0	0	0	0	0	0	0	0	0	0	0	0	0	0	0	0	0	0	0	0	0	0	0	0	是	是	是	0	0	0	0	0	0	0
262	2	1	2	1.63	60	2	0	0	0	0	0	0	0	0	0	0	0	0	0	0	0	0	0	0	0	0	0	0	0	0	0	0	0	0	0	0	0	0	0	否	是	否	1	1	0	1	1	1	1
263	2	1	2	1.6	80	4	0	1	1	0	0	2	2	0	0	0	0	0	0	0	0	0	0	3	0	15	15	0	20	0	3	2	1	0	1	1	2	4	1	是	否	否	1	0	0	0	1	1	1
264	1	1	1	1.72	71	4	0	0	0	0	0	0	0	10	5	5	10	5	10	10	10	15	10	1	0	15	0	0	0	0	1	0	1	2	2	2	2	4	1	是	是	是	0	0	0	0	0	0	0
265	2	1	1	1.65	68	4	1	0	0	1	0	2	2	0	0	0	0	0	0	0	0	0	0	0	0	0	0	0	0	0	0	0	0	0	0	0	0	0	0	否	否	否	1	1	1	1	1	0	1
266	1	1	1	1.75	75	4	0	0	1	0	0	1	1	0	0	0	0	0	0	0	0	0	0	4	0	0	0	0	0	0	0	0	0	0	0	0	0	0	0	是	是	否	1	1	1	1	1	0	0
267	1	1	1	1.75	78	4	0	0	1	0	0	1	1	0	0	0	0	0	0	0	0	0	0	0	0	0	0	0	0	0	0	0	0	0	0	0	0	0	0	否	是	否	1	1	1	1	1	1	1
268	2	1	1	1.5	130	4	1	0	0	1	0	2	2	10	5	5	10	10	10	10	15	15	10	0	0	0	0	0	0	0	0	0	2	2	2	2	2	5	1	是	是	9999	0	0	0	0	0	0	0
269	1	1	3	160	165	1	0	1	1	0	0	2	2	10	0	0	0	0	0	0	0	0	0	4	0	0	0	0	20	0	1	5	0	0	0	1	2	5	1	是	否	是	1	0	0	0	0	0	0
270	2	1	3	1.6	70	4	0	1	1	0	0	2	2	0	0	0	0	0	0	0	0	0	0	0	0	0	0	0	0	0	0	0	0	0	0	0	0	0	0	是	否	否	1	0	0	1	1	0	1
271	2	1	3	1.5	60	2	0	0	0	0	0	0	0	0	0	0	0	0	0	0	0	0	0	0	0	0	0	0	0	0	0	0	0	0	0	0	0	0	0	是	否	是	1	0	0	0	0	0	0
272	1	1	3	1.7	85	2	0	1	1	0	0	2	2	0	0	0	0	0	0	0	0	0	0	0	0	0	0	0	0	0	0	0	0	0	0	0	0	0	0	否	是	否	1	0	0	1	1	0	1
273	2	1	3	1.55	70	2	0	0	0	0	0	0	0	0	0	0	0	0	0	0	0	0	0	0	0	0	0	0	0	0	0	0	0	0	0	0	0	0	0	否	否	否	1	0	0	0	0	0	0
274	1	1	3	1.7	75	4	0	0	0	0	0	0	0	0	0	0	0	0	0	0	0	0	0	0	0	0	0	0	0	0	0	0	0	0	0	0	0	0	0	是	是	是	0	0	0	0	0	0	0
275	2	1	2	1.52	75	4	1	0	1	1	0	3	3	0	0	0	0	0	0	5	5	10	5	3	15	15	15	20	10	15	3	4	1	1	1	1	0	3	2	否	是	否	1	0	0	0	0	0	0
276	2	1	1	1.55	60	4	1	0	1	1	1	4	3	0	0	0	0	0	0	0	0	0	0	0	0	0	0	0	0	0	0	0	0	0	0	0	0	0	0	是	是	是	0	0	0	0	0	0	0
277	2	1	2	1.5	52	4	0	0	0	0	0	0	0	0	0	0	0	0	0	0	0	0	0	0	0	0	0	0	0	0	0	0	0	0	0	0	0	0	0	是	是	是	0	0	0	0	0	0	0
278	2	1	1	1.55	38	2	0	0	0	1	0	1	1	0	0	0	0	0	0	0	0	0	0	0	0	0	0	0	0	0	0	0	0	0	0	0	0	0	0	是	是	否	1	1	1	1	1	1	1
279	1	1	1	1.76	65	2	1	0	0	0	1	2	2	10	5	5	10	10	10	10	15	15	10	0	0	15	0	0	10	0	1	0	2	2	2	2	2	5	1	是	是	否	1	0	1	1	1	1	1
280	2	1	1	1.67	70	2	0	0	1	0	1	2	2	10	0	5	10	10	10	10	15	15	10	1	15	15	15	0	10	0	3	2	2	1	2	1	2	5	1	是	是	是	0	0	0	0	0	0	0
281	1	1	1	1.67	65	1	0	0	0	0	0	0	0	0	0	0	0	0	0	0	0	0	0	0	0	0	0	0	0	0	0	0	0	0	0	0	0	0	0	是	是	否	1	1	1	1	1	1	1
282	2	1	1	1.47	62	2	1	0	0	0	0	1	1	0	0	0	0	0	0	0	0	0	0	0	0	0	0	0	0	0	0	0	0	0	0	0	0	0	0	是	是	否	1	1	0	1	1	1	1
283	1	1	6	1.7	72	2	0	0	0	0	0	0	0	10	5	5	10	10	10	10	15	15	10	0	0	0	0	0	0	0	0	0	2	2	2	2	2	5	1	是	是	是	0	0	0	0	0	0	0
284	2	1	2	1.6	80	4	0	0	0	0	0	0	0	0	0	0	0	0	0	0	0	0	0	0	0	0	0	0	0	0	0	0	0	0	0	0	0	0	0	是	是	是	0	0	0	0	0	0	0
285	1	1	2	1.7	70	4	0	1	0	0	0	1	1	0	0	0	0	0	0	0	0	0	0	0	0	0	0	0	0	0	0	0	0	0	0	0	0	0	0	否	是	否	1	1	0	1	1	1	1
286	2	1	2	1.66	70	1	0	0	0	0	0	0	0	0	0	0	0	0	0	0	0	0	0	0	0	0	0	0	0	0	0	0	0	0	0	0	0	0	0	否	是	否	1	1	0	1	0	1	1
287	1	1	2	1.6	60	1	0	0	0	0	0	0	0	0	0	0	0	0	0	0	0	0	0	0	0	0	0	0	0	0	0	0	0	0	0	0	0	0	0	否	是	否	1	1	0	1	1	1	1
288	1	1	2	175	70	2	0	1	0	0	0	1	1	0	0	0	0	0	0	0	0	0	0	0	0	0	0	0	0	0	0	0	0	0	0	0	0	0	0	否	是	否	1	0	0	1	1	0	1
289	2	1	2	1.67	65	2	0	0	0	0	0	0	0	0	0	0	0	0	0	0	0	0	0	0	0	0	0	0	0	0	0	0	0	0	0	0	0	0	0	是	是	是	0	0	0	0	0	0	0
290	2	1	2	1.6	70	4	0	0	0	0	0	0	0	0	0	0	0	0	0	0	0	0	0	0	0	0	0	0	0	0	0	0	0	0	0	0	0	0	0	否	是	否	1	1	1	1	1	1	1
291	2	1	2	1.65	60	4	0	1	0	0	0	1	1	0	0	0	0	0	0	0	0	0	0	0	0	0	0	0	0	0	0	0	0	0	0	0	0	0	0	否	是	否	1	1	0	1	1	1	1
292	2	1	2	1.6	65	4	1	0	0	0	0	1	1	0	0	0	0	0	0	0	0	0	0	0	0	0	0	0	0	0	0	0	0	0	0	0	0	0	0	否	是	否	1	1	1	0	1	1	1
293	2	1	2	1.6	65	4	0	1	0	0	0	1	1	0	0	0	0	0	0	0	0	0	0	0	0	0	0	0	0	0	0	0	0	0	0	0	0	0	0	否	否	否	1	0	0	0	0	1	1
294	2	1	2	1.62	60	1	0	0	0	0	0	0	0	0	0	0	0	0	0	0	0	0	0	0	0	0	0	0	0	0	0	0	0	0	0	0	0	0	0	是	是	是	0	0	0	0	0	0	0
295	2	1	2	1.6	50	4	0	1	0	0	0	1	1	0	0	0	0	0	0	0	0	0	0	0	0	0	0	0	0	0	0	0	0	0	0	0	0	0	0	否	是	否	1	0	0	1	1	0	0
296	2	1	2	1.65	70	4	0	1	0	0	0	1	1	0	0	0	0	0	0	0	0	0	0	0	0	0	0	0	0	0	0	0	0	0	0	0	0	0	0	否	是	否	1	1	0	1	1	1	1
297	1	1	1	1.65	65	3	1	1	0	0	0	2	2	0	0	0	0	0	0	0	0	0	0	0	0	0	0	0	0	0	0	0	0	0	0	0	0	0	0	否	否	否	1	0	0	0	1	1	1
298	2	1	2	1.55	60	4	0	1	0	0	0	1	1	0	0	0	0	0	0	0	0	0	0	0	0	0	0	0	0	0	0	0	0	0	0	0	0	0	0	否	否	否	1	1	0	0	1	1	0
299	1	1	2	1.65	70	2	0	1	0	0	0	1	1	0	0	0	0	0	0	0	0	0	0	0	0	0	0	0	0	0	0	0	0	0	0	0	0	0	0	否	否	否	1	0	0	0	0	0	0
300	1	1	2	1.65	50	1	1	1	1	0	1	4	3	10	0	5	5	10	10	10	15	15	0	1	15	15	30	20	10	15	3	0	1	0	1	2	2	1	2	否	否	否	1	0	0	0	0	0	0
301	2	1	2	1.65	50	3	1	1	1	0	1	4	3	0	0	0	0	0	0	0	0	0	0	3	0	0	15	0	0	0	1	0	1	0	0	2	2	5	1	是	是	是	0	0	0	0	0	0	0
302	2	1	2	1.55	60	3	0	1	0	0	0	1	1	0	0	0	0	0	0	0	0	0	0	0	0	0	0	0	0	0	0	0	0	0	0	0	0	0	0	否	是	是	0	0	0	0	0	0	0
303	1	1	2	1.72	75	2	0	1	1	0	0	2	2	0	0	0	0	0	0	0	0	0	0	4	0	0	0	0	0	0	0	0	0	0	0	0	0	0	0	否	否	否	1	1	0	0	1	0	1
304	1	1	2	165	60	2	1	1	1	0	0	3	3	0	0	0	0	0	0	0	0	0	0	4	0	0	0	0	0	0	0	0	0	0	0	0	0	0	0	是	是	是	0	0	0	0	0	0	0
305	2	1	2	1.55	70	4	0	1	0	0	0	1	1	0	0	0	0	0	0	0	0	0	0	0	0	0	0	0	0	0	0	0	0	0	0	0	0	0	0	否	是	否	1	0	0	1	1	1	1
306	1	1	2	1.65	55	2	0	1	1	0	0	2	2	0	0	0	0	0	0	0	0	0	0	0	0	0	0	0	0	0	0	0	0	0	0	0	0	0	0	是	是	是	0	0	0	0	0	0	0
307	2	1	2	1.6	58	4	0	1	0	0	0	1	1	0	0	0	0	0	0	0	0	0	0	0	0	0	0	0	0	0	0	0	0	0	0	0	0	0	0	否	是	是	0	0	0	0	0	0	0
308	2	1	2	1.6	60	4	0	1	1	0	0	2	2	0	0	0	0	0	0	0	0	0	0	0	0	0	0	0	0	0	0	0	0	0	0	0	0	0	0	是	是	是	0	0	0	0	0	0	0
309	2	1	2	1.62	60	4	0	1	1	0	0	2	2	0	0	0	0	0	0	0	0	0	0	0	0	0	0	0	0	0	0	0	0	0	0	0	0	0	0	否	否	否	1	0	0	0	0	0	0
310	2	1	2	1.58	55	4	0	1	1	0	0	2	2	0	0	0	0	0	0	0	0	0	0	0	0	0	0	0	0	0	0	0	0	0	0	0	0	0	0	否	否	否	1	0	0	0	0	0	0
311	2	1	2	1.6	56	2	0	1	1	0	0	2	2	0	0	0	0	0	0	0	0	0	0	0	0	0	0	0	0	0	0	0	0	0	0	0	0	0	0	否	否	否	1	0	0	0	0	0	0
312	2	1	2	1.62	65	4	0	1	0	0	0	1	1	0	0	0	0	0	0	0	0	0	0	0	0	0	0	0	0	0	0	0	0	0	0	0	0	0	0	否	否	否	1	0	0	1	1	0	0
313	2	1	2	1.62	55	4	0	1	1	0	0	2	2	0	0	0	0	0	0	0	0	0	0	0	0	0	0	0	0	0	0	0	0	0	0	0	0	0	0	否	否	否	1	0	0	1	1	1	0
314	1	1	2	1.65	70	4	0	1	0	0	0	1	1	0	0	0	0	0	0	0	0	0	0	4	0	0	0	0	0	0	0	0	0	0	0	0	0	0	0	否	是	否	1	1	0	1	1	1	1
315	1	1	2	1.73	65	4	0	1	0	0	0	1	1	0	0	0	0	0	0	0	0	0	0	0	0	0	0	0	0	0	0	0	0	0	0	0	0	0	0	是	是	是	0	0	0	0	0	0	0
3	2	1	2	1.6	65	2	0	1	1	0	0	2	2	5	0	0	5	0	0	0	10	10	0	3	0	0	15	0	10	15	2	0	1	1	1	2	2	1	1	否	否	否	1	0	0	0	0	0	0
317	1	1	2	1.73	65	4	0	1	0	0	0	1	1	0	0	0	0	0	0	0	0	0	0	0	0	0	0	0	0	0	0	0	0	0	0	0	0	0	0	是	是	否	1	1	1	1	1	1	1
318	2	1	2	1.6	55	4	0	0	0	0	0	0	0	0	0	0	0	0	0	0	0	0	0	0	0	0	0	0	0	0	0	0	0	0	0	0	0	0	0	否	是	否	1	1	0	1	1	1	1
321	1	1	2	1.6	70	2	0	0	0	0	0	0	0	0	0	0	0	0	0	0	0	0	0	0	0	0	0	0	0	0	0	0	0	0	0	0	0	0	0	是	是	是	0	0	0	0	0	0	0
322	1	1	2	1.67	70	4	0	0	0	0	0	0	0	0	0	0	0	0	0	0	0	0	0	0	0	0	0	0	0	0	0	0	0	0	0	0	0	0	0	是	是	是	0	0	0	0	0	0	0
323	1	1	2	1.68	60	2	0	1	1	0	0	2	2	5	0	0	0	0	0	0	5	5	0	4	0	15	15	20	20	15	3	0	1	0	0	2	2	5	1	否	否	否	1	0	0	0	0	0	0
324	1	1	2	1.68	60	2	0	1	1	0	0	2	2	5	0	0	0	0	0	5	5	10	0	3	0	15	15	20	20	15	3	0	1	0	0	2	2	5	1	否	否	否	1	0	0	0	0	0	0
325	1	1	2	1.73	60	4	0	1	1	0	0	2	2	5	0	0	5	5	5	5	5	5	0	3	0	15	15	20	20	15	3	0	1	0	0	2	2	5	1	是	是	是	0	0	0	0	0	0	0
326	2	1	2	1.6	65	4	0	1	1	0	0	2	2	5	0	0	0	0	0	0	5	0	0	4	0	15	15	20	20	15	3	0	1	0	0	2	2	5	1	否	否	否	1	0	0	0	1	0	0
327	1	1	2	1.73	70	4	0	0	0	0	0	0	0	0	0	0	0	0	0	0	0	0	0	0	0	0	0	0	0	0	0	0	0	0	0	0	0	0	0	否	否	否	1	1	0	1	1	1	1
328	2	1	1	1.5	80	4	0	1	1	1	1	4	3	0	0	0	0	0	0	0	0	0	0	4	0	15	0	20	0	0	2	0	0	0	0	2	0	3	2	否	否	否	1	0	0	0	1	0	0
329	1	1	2	1.62	55	4	0	1	1	0	0	2	2	5	0	0	0	10	10	0	0	0	0	3	0	15	15	20	20	15	3	0	1	1	1	2	2	4	1	否	否	否	1	0	0	0	0	0	0
330	1	1	2	1.65	50	4	0	1	1	0	1	3	3	10	0	0	0	10	0	0	0	0	0	3	15	15	15	20	20	15	3	0	0	0	0	2	2	4	1	否	否	否	1	0	0	0	0	0	0
331	2	1	2	1.5	50	4	0	1	1	0	0	2	2	10	0	0	0	5	5	5	10	0	0	3	0	15	0	20	0	0	2	3	0	0	0	1	1	3	2	是	是	是	0	0	0	0	0	0	0
332	2	1	2	1.59	70	2	0	1	1	0	0	2	2	5	0	0	0	10	10	0	0	0	0	3	0	15	0	20	20	15	3	1	0	0	0	2	2	5	1	否	否	否	1	0	0	0	1	0	1
333	1	1	2	1.68	80	2	0	1	1	0	0	2	2	5	0	0	0	10	10	0	0	0	0	3	0	15	15	20	20	15	3	0	1	0	0	2	1	4	1	否	否	否	1	0	0	0	1	0	1
334	2	1	2	165	55	4	0	1	1	0	0	2	2	5	0	0	0	5	0	0	0	0	0	4	0	15	15	20	20	15	3	0	0	0	0	2	2	5	1	否	是	否	1	0	0	0	1	0	0
335	2	1	2	1.6	70	4	0	1	1	0	0	2	2	5	0	0	0	5	0	0	0	0	0	4	0	15	15	20	20	15	3	0	0	0	0	2	2	5	1	否	是	否	1	0	0	0	1	0	0
336	2	1	2	1.65	60	4	0	1	1	0	0	2	2	10	0	0	0	10	10	10	0	5	0	2	0	15	15	20	20	15	3	0	1	0	1	2	1	3	1	否	否	是	1	0	0	0	0	0	0
337	2	1	2	1.41	42	4	0	1	1	0	0	2	2	10	0	0	0	10	0	0	10	0	0	3	0	15	15	20	10	15	3	8	1	0	0	0	1	3	1	否	否	否	1	0	0	0	1	1	1
338	2	1	2	1.55	5	4	1	1	1	0	1	4	3	0	0	0	0	0	0	0	0	0	0	4	0	15	0	0	0	15	2	4	0	0	0	1	2	3	2	否	否	否	1	0	0	0	0	0	0
339	2	1	2	1.5	70	4	0	1	1	0	0	2	2	5	0	0	0	0	0	0	0	0	0	4	0	15	15	20	20	15	3	2	0	0	0	1	2	4	2	否	是	否	1	0	0	0	1	0	0
340	2	1	2	1.5	50	4	0	1	1	0	0	2	2	0	0	0	0	10	10	0	0	0	0	4	15	15	0	0	0	15	2	5	0	0	0	1	1	4	2	否	否	否	1	0	0	0	1	1	1
341	1	1	2	1.73	70	2	0	1	1	0	0	2	2	10	0	0	0	10	10	5	10	10	0	2	0	15	15	20	20	15	3	0	1	1	0	2	2	5	1	否	否	否	1	0	0	0	1	0	0
342	1	1	2	1.75	71	3	0	1	1	0	0	2	2	0	0	0	0	0	0	0	0	0	0	0	0	0	0	0	0	0	0	0	0	0	0	0	0	0	0	否	是	否	1	0	0	0	1	0	0
343	1	1	2	1.7	65	4	0	0	0	0	0	0	0	0	0	0	0	0	0	0	0	0	0	4	0	0	0	0	0	0	0	0	0	0	0	0	0	0	0	否	否	否	1	0	0	0	0	0	0
344	2	1	2	1.5	59.5	4	0	1	1	0	0	2	2	0	0	0	0	0	0	0	0	0	0	0	0	0	0	0	0	0	0	0	0	0	0	0	0	0	0	否	否	否	1	0	0	0	0	0	1
345	2	1	2	1.68	150	4	0	1	0	0	0	1	1	0	0	0	0	0	0	0	0	0	0	0	0	0	0	0	0	0	0	0	0	0	0	0	0	0	0	是	是	否	1	1	0	0	1	1	1
346	1	1	2	1.65	70	4	0	1	1	0	0	2	2	10	0	5	10	10	10	10	15	10	0	1	15	0	15	0	10	0	2	3	1	2	1	1	2	4	1	是	是	是	0	0	0	0	0	0	0
347	1	1	2	1.75	76	4	0	1	1	1	0	3	3	10	0	0	0	5	10	0	5	5	0	3	0	15	15	20	20	0	3	3	1	0	1	1	1	4	1	是	是	是	0	0	0	0	0	0	0
348	2	1	1	1.55	57	2	0	0	0	0	0	0	0	0	0	0	0	0	0	0	0	0	0	0	0	0	0	0	0	0	0	0	0	0	0	0	0	0	0	是	是	是	0	0	0	0	0	0	0
350	2	1	2	1.6	65	4	0	1	1	0	0	2	2	0	0	0	0	0	0	0	0	0	0	0	0	0	0	0	0	0	0	0	0	0	0	0	0	0	0	是	是	是	0	0	0	0	0	0	0
351	2	1	2	1.52	50	4	0	1	1	0	0	2	2	0	0	0	0	0	0	0	0	0	0	4	0	0	0	0	0	0	0	0	0	0	0	0	0	0	0	否	否	否	1	0	0	0	1	0	1
352	1	1	2	1.75	130	2	0	1	0	0	0	1	1	0	0	0	0	0	0	0	0	0	0	0	0	0	0	0	0	0	0	0	0	0	0	0	0	0	0	否	是	否	1	1	0	0	1	1	1
353	2	1	2	1.6	120	4	0	1	1	0	0	2	2	0	0	0	0	0	0	0	0	0	0	0	0	0	0	0	0	0	0	0	0	0	0	0	0	0	0	是	是	是	0	0	0	0	0	0	0
354	1	9999	2	1.72	70	4	0	1	0	0	0	1	1	0	0	0	0	0	0	0	0	0	0	0	0	0	0	0	0	0	0	0	0	0	0	0	0	0	0	9999	9999	9999	0	0	0	0	0	0	0
355	1	1	2	1.7	65	4	0	1	1	0	0	2	2	10	0	0	0	10	5	0	10	0	0	3	0	0	15	20	20	15	3	0	1	0	0	2	1	5	1	否	是	否	1	0	0	0	1	0	0
356	2	1	2	1.59	55	4	0	1	1	0	0	2	2	10	0	5	10	10	10	10	15	10	0	1	0	15	0	20	10	0	2	0	1	2	1	2	2	4	1	是	是	是	0	0	0	0	0	0	0
357	2	1	2	1.72	70	4	0	0	0	0	0	0	0	0	0	0	0	0	0	0	0	0	0	4	0	0	0	0	0	0	0	0	0	0	0	0	0	0	0	否	否	否	1	0	0	0	0	0	0
358	1	1	2	1.65	60	4	0	1	0	0	0	1	1	0	0	0	0	0	0	0	0	0	0	0	0	0	0	0	0	0	0	0	0	0	0	0	0	0	0	否	是	否	0	1	1	1	1	1	1
359	1	1	2	1.7	75	4	0	0	0	0	0	0	0	10	5	5	10	10	10	10	15	15	10	0	0	15	15	0	0	0	2	0	2	2	2	2	2	5	1	是	是	是	0	0	0	0	0	0	0
360	2	1	2	1.65	80	4	0	0	0	0	0	0	0	10	0	5	10	10	10	10	15	5	10	1	0	0	15	0	20	0	2	0	2	2	2	2	2	5	1	是	是	是	0	0	0	0	0	0	0
361	1	1	2	1.65	70	2	0	0	0	0	0	0	0	0	0	0	0	0	0	0	0	0	0	0	0	0	0	0	0	0	0	0	0	0	0	0	0	0	0	是	是	是	0	0	0	0	0	0	0
362	2	1	2	1.5	50	2	0	0	1	0	0	1	1	0	0	0	0	0	0	0	0	0	0	0	0	0	0	0	0	0	0	0	0	0	0	0	0	0	0	否	是	是	1	0	0	0	0	0	0
363	1	1	2	1.69	71	2	1	0	0	0	0	1	1	0	0	0	0	0	0	0	0	0	0	0	0	0	0	0	0	0	0	0	0	0	0	0	0	0	0	是	是	是	0	0	0	0	0	0	0
364	2	2	2	1.6	150	2	1	1	1	1	1	5	5	5	0	0	0	5	5	0	5	0	0	4	0	15	0	0	10	0	2	3	1	0	0	1	1	4	2	是	是	是	0	0	0	0	0	0	0
365	2	1	1	1.58	49	2	1	0	0	1	1	3	3	10	5	5	10	10	10	10	15	15	10	0	15	15	0	0	0	0	2	0	2	2	2	2	2	4	1	是	是	是	0	0	0	0	0	0	0
366	1	1	1	1.6	65	2	1	1	1	1	0	4	3	10	5	0	5	5	10	5	10	15	0	1	0	15	15	0	10	0	2	2	1	1	1	1	1	4	1	是	是	是	0	0	0	0	0	0	0
368	1	1	1	1.7	55	2	1	1	1	1	1	5	3	0	0	0	0	10	10	10	5	5	0	3	0	15	15	0	20	15	3	3	1	0	0	1	1	4	2	是	是	是	0	0	0	0	0	0	0
369	2	1	1	1.55	58	4	1	1	1	1	0	4	3	10	0	0	5	10	10	10	10	5	0	2	15	15	15	20	20	0	3	5	1	1	1	1	2	4	1	是	是	是	0	0	0	0	0	0	0
370	2	1	1	1.56	70	4	0	0	0	1	0	1	1	0	0	0	0	0	0	0	0	0	0	0	0	0	0	0	0	0	0	0	0	0	0	0	0	0	0	9999	9999	9999	0	0	0	0	0	0	0
371	2	1	1	1.46	78	2	1	0	1	1	0	3	3	10	0	5	10	5	10	10	15	15	0	1	0	15	30	0	10	0	3	2	1	1	1	1	1	4	1	是	是	是	0	0	0	0	0	0	0
372	2	1	1	1.7	160	2	0	1	1	0	0	2	2	0	0	0	0	0	0	0	0	0	0	0	0	0	0	0	0	0	0	0	0	0	0	0	0	0	0	是	是	是	0	0	0	0	0	0	0
373	1	1	1	1.74	72	2	1	0	0	1	1	3	3	10	5	5	10	10	10	10	15	15	10	0	0	15	15	0	10	0	2	2	1	2	2	1	2	4	1	是	是	是	0	0	0	0	0	0	0
374	2	1	1	1.48	53.9	2	0	0	0	1	0	1	1	0	0	0	0	0	0	0	0	0	0	0	0	0	0	0	0	0	0	0	0	0	0	0	0	0	0	是	是	是	0	0	0	0	0	0	0
375	1	1	1	1.7	80	2	0	0	0	0	0	0	0	0	0	0	0	0	0	0	0	0	0	0	0	0	0	0	0	0	0	0	0	0	0	0	0	0		是	是	是	0	0	0	0	0	0	0
376	1	1	1	1.7	90	4	0	0	0	1	0	1	1	0	0	0	0	0	0	0	0	0	0	0	0	0	0	0	0	0	0	0	0	0	0	0	0	0	0	是	是	否	1	1	1	1	1	1	1
377	2	1	1	1.64	63	4	0	0	0	1	0	1	1	0	0	0	0	0	0	0	0	0	0	0	0	0	0	0	0	0	0	0	0	0	0	0	0	0	0	是	是	是	0	0	0	0	0	0	0
378	2	1	1	1.62	70	4	0	0	0	0	0	0	0	10	0	5	10	10	10	10	15	15	10	1	0	0	0	0	0	0	0	1	2	2	2	2	2	5	1	是	是	否	1	1	1	1	1	1	1
379	1	1	1	1.68	72	2	0	0	0	0	0	0	0	0	0	0	0	0	0	0	0	0	0	0	0	0	0	0	0	0	0	0	0	0	0	0	0	0	0	是	是	是	0	0	0	0	0	0	0
380	2	1	1	1.58	70	2	1	0	0	0	0	1	1	10	5	5	10	10	10	10	15	15	10	0	0	0	0	0	0	0	0	0	2	2	2	2	2	5	1	是	是	是	0	0	0	0	0	0	0
381	2	1	2	1.67	73	4	1	0	0	0	0	1	1	0	0	0	0	0	0	0	0	0	0	0	0	0	0	0	0	0	0	0	0	0	0	0	0	0	0	9999	是	9999	0	0	0	0	0	0	0
382	2	1	1	1.6	62	4	0	0	0	0	0	0	0	0	0	0	0	0	0	0	0	0	0	0	0	0	0	0	0	0	0	0	0	0	0	0	0	0	0	是	是	是	0	0	0	0	0	0	0
383	1	1	2	1.7	60	2	0	0	0	0	0	0	0	0	0	0	0	0	0	0	0	0	0	0	0	0	0	0	0	0	0	0	0	0	0	0	0	0	0	是	是	是	0	0	0	0	0	0	0
384	1	1	2	1.84	84	2	0	0	0	0	0	0	0	0	0	0	0	0	0	0	0	0	0	0	0	0	0	0	0	0	0	0	0	0	0	0	0	0	0	是	是	是	0	0	0	0	0	0	0
385	2	1	2	1.63	69	2	0	0	0	0	0	0	0	0	0	0	0	0	0	0	0	0	0	0	0	0	0	0	0	0	0	0	0	0	0	0	0	0	0	是	是	否	1	1	1	1	1	1	1
386	2	1	2	1.58	52	4	0	0	0	0	0	0	0	0	0	0	0	0	0	0	0	0	0	0	0	0	0	0	0	0	0	0	0	0	0	0	0	0	0	是	是	否	1	0	0	1	0	1	1
387	2	1	2	1.6	75.5	2	1	0	1	1	0	3	3	10	5	5	10	10	10	10	15	15	5	1	15	15	0	0	0	0	2	2	1	2	2	1	1	3	1	是	是	否	1	1	1	1	1	0	1
388	1	1	2	1.7	56	2	0	0	0	0	0	0	0	0	0	0	0	0	0	0	0	0	0	0	0	0	0	0	0	0	0	0	0	0	0	0	0	0	0	是	是	是	0	0	0	0	0	0	0
389	1	1	6	1.65	72	2	0	1	1	1	0	3	3	10	0	0	5	10	10	5	10	5	0	2	0	15	15	0	20	0	3	0	1	1	1	2	2	5	1	是	是	是	0	0	0	0	0	0	0
390	2	1	6	160	70	2	0	1	1	0	0	2	2	0	0	0	0	0	0	0	0	0	0	4	0	0	15	0	0	0	1	0	0	0	0	2	2	5	1	否	是	是	1	0	0	0	0	0	0
391	2	1	6	160	80	2	1	1	1	0	0	3	3	0	0	0	0	0	0	0	0	0	0	0	0	0	0	0	0	0	0	0	0	0	0	0	0	0	0	否	是	是	1	0	0	0	0	0	0
392	2	1	6	1.63	80	4	0	0	0	0	1	1	1	0	0	0	0	0	0	0	0	0	0	0	0	0	0	0	0	0	0	0	0	0	0	0	0	0	0	是	是	是	0	0	0	0	0	0	0
393	2	1	6	1.55	72	4	0	1	1	0	0	2	2	0	0	0	0	0	0	0	0	0	0	4	0	0	15	0	20	15	3	7	0	0	0	1	1	4	2	否	否	否	1	0	0	0	0	0	0
394	2	9999	6	158	75	1	0	0	0	1	0	1	1	0	0	0	0	0	0	0	0	0	0	0	0	0	0	0	0	0	0	0	0	0	0	0	0	0	0	是	是	是	0	0	0	0	0	0	0
395	2	1	6	150	55	2	0	1	0	0	0	1	1	0	0	0	0	0	0	0	0	0	0	0	0	0	0	0	0	0	0	0	0	0	0	0	0	0	0	否	是	是	1	0	0	0	0	0	0
396	2	1	6	1.55	60	4	0	1	1	0	0	2	2	0	0	0	0	0	0	0	0	0	0	0	0	0	0	0	0	0	0	0	0	0	0	0	0	0	0	否	是	是	1	0	0	0	0	0	0
397	2	1	6	1.5	42	4	0	0	0	0	0	0	0	0	0	0	0	0	0	0	0	0	0	0	0	0	0	0	0	0	0	0	0	0	0	0	0	0	0	否	否	否	1	0	0	0	1	0	0
398	2	1	6	160	55	2	0	1	1	0	0	2	2	0	0	0	0	0	0	0	0	0	0	0	0	0	0	0	0	0	0	0	0	0	0	0	0	0	0	否	是	是	1	0	0	0	0	0	0
399	2	1	6	1.5	55	4	1	1	1	0	1	4	3	10	0	0	0	0	0	0	0	0	0	4	0	0	15	0	20	0	2	3	1	0	1	1	1	4	1	是	是	是	0	0	0	0	0	0	0
400	1	1	6	1.62	60	2	1	0	0	0	0	1	1	0	0	0	0	0	0	0	0	0	0	0	0	0	0	0	0	0	0	0	0	0	0	0	0	0	0	是	是	是	0	0	0	0	0	0	0
401	2	1	6	150	50	2	0	1	1	0	0	2	2	0	0	0	0	0	0	0	0	0	0	0	0	0	0	0	0	0	0	0	0	0	0	0	0	0	0	是	是	是	0	0	0	0	0	0	0
402	2	1	6	1.6	65	4	1	1	0	0	1	3	3	10	0	5	10	0	5	10	0	15	5	2	0	15	15	0	10	0	2	2	1	1	1	1	2	5	1	是	是	是	0	0	0	0	0	0	0
403	2	1	6	165	65	4	0	1	1	1	0	3	3	0	0	0	0	0	0	0	0	0	0	4	0	15	0	0	0	15	2	0	0	0	0	1	0	0	3	否	否	否	1	0	0	0	0	0	0
404	2	9999	6	160	50	2	0	1	1	1	0	3	3	0	0	0	0	0	0	0	0	0	0	0	0	0	0	0	0	0	0	0	0	0	0	0	0	0	0	否	否	否	1	0	0	0	0	0	0
405	2	1	6	150	55	2	0	1	1	0	0	2	2	0	0	0	0	0	0	0	0	0	0	0	0	0	0	0	0	0	0	0	0	0	0	0	0	0	0	否	否	否	1	0	0	0	0	0	0
406	2	1	6	1.5	48	4	0	1	0	0	0	1	1	0	0	0	0	0	0	0	0	0	0	0	0	0	0	0	0	0	0	0	0	0	0	0	0	0	0	否	否	否	1	0	0	0	0	0	0
407	2	1	6	1.5	45	4	0	0	0	0	0	0	0	0	0	0	0	0	0	0	0	0	0	0	0	0	0	0	0	0	0	0	0	0	0	0	0	0	0	是	是	9999	0	0	0	0	0	0	0
.	2	1	6	1.65	60	4	0	1	1	1	0	3	3	10	0	0	0	5	0	0	0	0	0	4	0	15	0	0	0	0	1	2	0	0	0	1	2	4	2	否	否	否	1	1	1	1	1	1	1
409	2	1	6	1.5	70	4	0	1	1	0	0	2	2	0	0	0	0	0	0	0	0	0	0	0	0	15	0	20	0	15	3	0	0	0	0	2	2	5	1	否	否	否	1	0	0	0	0	0	0
410	2	1	6	148	47	4	0	1	1	1	0	3	3	0	0	0	0	0	0	0	0	0	0	0	0	0	0	0	0	0	0	0	0	0	0	0	0	0	0	否	否	是	1	0	0	0	0	0	0
411	1	1	6	158	50	2	0	1	1	0	0	2	2	0	0	0	0	0	0	0	0	0	0	0	0	0	0	0	0	0	0	0	0	0	0	0	0	0	0	否	是	是	1	0	0	0	0	0	0
412	1	1	6	1.65	70	4	0	1	1	0	0	2	2	0	0	0	0	0	0	0	0	0	0	0	0	0	0	0	0	0	0	0	0	0	0	0	0	0	0	否	否	否	1	0	0	0	0	0	0
413	1	1	6	1.6	60	2	0	0	0	0	0	0	0	0	0	0	0	0	0	0	0	0	0	0	0	0	0	0	0	0	0	0	0	0	0	0	0	0	0	是	是	是	0	0	0	0	0	0	0
414	2	1	6	1.65	80	2	0	1	1	1	0	3	3	5	0	0	0	0	0	0	0	0	0	4	0	15	0	20	0	0	2	0	0	0	1	2	2	5	1	否	否	否	1	0	0	0	0	0	0
415	2	9999	6	1.6	40	1	0	1	1	0	0	2	2	0	0	0	0	0	0	0	0	0	0	0	0	0	0	0	0	0	0	0	0	0	0	0	0	0	0	否	否	否	1	0	0	0	0	0	0
416	2	1	6	170	80	2	0	1	1	0	0	2	2	0	0	0	0	0	0	0	0	0	0	0	0	0	0	0	0	0	0	0	0	0	0	0	0	0	0	否	是	否	1	0	0	0	0	0	0
417	2	1	6	1.55	65	4	1	1	1	0	0	3	3	0	0	0	0	0	0	0	0	0	0	0	0	0	0	0	0	0	0	0	0	0	0	0	0	0	0	否	是	否	1	0	0	0	0	0	0
418	2	1	6	1.66	55	4	0	0	0	0	0	0	0	0	0	0	0	0	0	0	0	0	0	0	0	0	0	0	0	0	0	0	0	0	0	0	0	0	0	是	否	是	1	0	0	0	0	0	0
419	2	1	6	1.65	65	4	0	1	1	0	0	2	2	0	0	0	0	0	0	0	0	0	0	0	15	15	0	0	0	0	2	0	0	0	0	2	2	4	1	否	否	否	1	0	0	0	0	0	0
420	2	1	6	1.6	55	4	1	1	1	1	0	4	3	5	0	0	5	10	10	5	10	10	0	2	0	15	15	0	10	0	2	3	1	1	1	1	2	4	1	是	否	否	1	0	0	0	1	0	1
421	2	1	6	1.58	80	4	1	1	1	0	0	3	3	0	0	0	0	0	0	0	0	0	0	0	0	0	0	0	0	0	0	0	0	0	0	0	0	0	0	否	否	否	1	0	0	0	0	0	0
422	1	1	6	170	70	2	1	1	1	0	0	3	3	0	0	0	0	0	0	0	0	0	0	0	0	0	0	0	0	0	0	0	0	0	0	0	0	0	0	否	是	是	1	0	0	0	0	0	0
423	2	9999	6	1.6	50	2	0	1	1	0	0	2	2	0	0	0	0	0	0	0	0	0	0	0	0	0	0	0	0	0	0	0	0	0	0	0	0	0	0	否	否	否	1	0	0	0	0	0	0
424	1	1	6	170	70	2	1	1	1	0	0	3	3	0	0	0	0	0	0	0	0	0	0	0	0	0	0	0	0	0	0	0	0	0	0	0	0	0	0	否	否	否	1	0	0	0	0	0	0
425	1	1	6	1.6	85	4	0	1	0	0	0	1	1	0	0	0	0	0	0	0	0	0	0	0	0	0	0	0	0	0	0	0	0	0	0	0	0	0	0	否	否	否	1	0	0	0	0	0	0
426	2	1	6	1.5	60	2	1	1	1	1	0	4	3	0	0	0	0	0	0	0	5	0	0	4	0	15	15	0	20	0	3	5	0	0	0	1	1	3	2	否	否	否	1	0	0	0	0	0	0
427	2	1	6	1.6	65	4	0	1	1	0	0	2	2	5	0	0	0	0	0	0	0	0	0	4	0	15	0	0	0	0	1	0	0	0	0	2	2	4	1	是	否	否	1	0	0	1	1	0	1
428	2	1	6	1.55	50	4	0	1	1	0	0	2	2	0	0	0	0	0	0	0	0	0	0	0	0	0	0	0	0	0	0	0	0	0	0	0	0	0	0	是	是	是	0	0	0	0	0	0	0
429	2	1	6	155	65	2	0	1	1	0	0	2	2	0	0	0	0	0	0	0	0	0	0	0	0	0	0	0	0	0	0	0	0	0	0	0	0	0	0	是	是	是	0	0	0	0	0	0	0
430	2	1	6	1.6	65	4	0	1	1	0	0	2	2	5	0	0	5	5	5	5	10	10	0	2	0	15	0	0	10	0	2	0	1	1	1	2	2	5	1	否	否	否	1	0	0	0	0	0	0
431	2	9999	6	1.5	50	4	1	1	1	0	0	3	3	0	0	0	0	0	0	0	0	0	0	0	0	0	0	0	0	0	0	0	0	0	0	0	0	0	0	是	是	是	0	0	0	0	0	0	0
432	1	9999	6	1.7	55	4	0	1	0	0	0	1	1	0	0	0	0	0	0	0	0	0	0	0	0	0	0	0	0	0	0	0	0	0	0	0	0	0	0	9999	9999	9999	0	0	0	0	0	0	0
433	2	1	6	1.65	45	4	0	0	0	0	0	0	0	0	0	0	0	0	0	0	0	0	0	0	0	0	0	0	0	0	0	0	0	0	0	0	0	0	0	是	是	是	0	0	0	0	0	0	0
434	2	1	6	1.6	65	4	0	1	0	0	0	1	1	0	0	0	0	0	0	0	0	0	0	0	0	0	0	0	0	0	0	0	0	0	0	0	0	0	0	是	是	是	0	0	0	0	0	0	0
435	1	1	6	165	665	2	1	0	0	0	0	1	1	0	0	0	0	0	0	0	0	0	0	0	0	0	0	0	0	0	0	0	0	0	0	0	0	0	0	是	是	是	0	0	0	0	0	0	0
436	1	1	6	1.77	55	4	0	0	0	0	0	0	0	0	0	0	0	0	0	0	0	0	0	0	0	0	0	0	0	0	0	0	0	0	0	0	0	0	0	是	是	是	0	0	0	0	0	0	0
437	1	9999	6	1.7	60	2	0	0	0	0	0	0	0	0	0	0	0	0	0	0	0	0	0	0	0	0	0	0	0	0	0	0	0	0	0	0	0	0	0	否	是	否	1	1	1	1	0	0	1
438	1	1	6	165	80	2	1	0	0	1	0	2	2	0	0	0	0	0	0	0	0	0	0	0	0	0	0	0	0	0	0	0	0	0	0	0	0	0	0	是	是	是	0	0	0	0	0	0	0
439	2	1	6	1.54	50	4	0	1	0	0	0	1	1	0	0	0	0	0	0	0	0	0	0	0	0	0	0	0	0	0	0	0	0	0	0	0	0	0	0	否	否	否	1	0	0	0	0	0	0
440	2	1	6	1.76	80	2	0	1	1	0	0	2	2	0	0	0	0	0	0	0	0	0	0	0	0	0	0	0	0	0	0	0	0	0	0	0	0	0	0	是	是	是	0	0	0	0	0	0	0
441	1	1	6	170	50	2	1	1	1	0	0	3	3	0	0	0	0	0	0	0	0	0	0	0	0	0	0	0	0	0	0	0	0	0	0	0	0	0	0	否	否	否	1	0	0	0	0	0	0
442	2	1	6	1.5	68	2	1	1	0	1	0	3	3	10	5	5	10	10	10	10	15	15	0	1	0	15	0	0	10	0	2	0	2	2	2	2	2	4	1	是	是	是	0	0	0	0	0	0	0
443	1	1	6	1.6	66	2	1	0	0	0	0	1	1	0	0	0	0	0	0	0	0	0	0	0	0	0	0	0	0	0	0	0	0	0	0	0	0	0	0	否	否	否	1	0	1	0	0	1	1
444	1	1	6	1.65	72	4	0	1	1	0	0	2	2	0	0	0	0	0	0	0	0	0	0	0	0	0	0	0	0	0	0	0	0	0	0	0	0	0	0	否	是	是	1	0	0	0	0	0	0
445	1	1	6	174	70	2	1	1	1	0	0	3	3	0	0	0	0	0	0	0	0	0	0	0	0	0	0	0	0	0	0	0	0	0	0	0	0	0	0	否	否	否	1	0	0	0	0	0	0
446	2	1	6	1.55	55	2	0	1	1	0	0	2	2	0	0	0	0	0	0	0	0	0	0	0	0	0	0	0	0	0	0	0	0	0	0	0	0	0	0	否	否	否	1	0	0	0	0	0	0
447	1	1	6	175	65	4	0	0	0	0	0	0	0	0	0	0	0	0	0	0	0	0	0	0	0	0	0	0	0	0	0	0	0	0	0	0	0	0	0	是	是	是	0	0	0	0	0	0	0
448	2	9999	6	1.6	72	4	0	0	0	1	0	1	1	0	0	0	0	0	0	0	0	0	0	0	0	0	0	0	0	0	0	0	0	0	0	0	0	0	0	是	是	是	0	0	0	0	0	0	0
449	2	1	6	1.56	75	2	1	0	0	1	1	3	3	10	5	5	10	10	10	10	15	15	10	0	15	15	0	20	10	0	3	8	1	1	0	2	2	4	1	否	否	否	1	0	1	1	1	1	1
450	2	1	6	1.6	80	4	0	1	0	1	0	2	2	10	0	5	10	10	10	10	15	15	5	1	0	15	0	0	0	0	1	3	1	1	1	1	2	4	1	否	是	否	1	1	1	1	1	1	1
451	2	9999	6	1.59	52	4	0	0	0	0	0	0	0	0	0	0	0	0	0	0	0	0	0	0	0	0	0	0	0	0	0	0	0	0	0	0	0	0	0	是	是	是	0	0	0	0	0	0	0
452	2	1	6	1.6	55	4	1	0	0	1	0	2	2	0	0	0	0	0	0	0	0	0	0	0	0	0	0	0	0	0	0	0	0	0	0	0	0	0	0	否	是	是	1	0	0	0	0	0	0
453	1	1	6	1.68	60	9999	1	1	1	0	0	3	3	10	0	5	10	10	10	10	15	15	5	1	0	15	15	0	10	0	2	0	1	1	1	2	2	4	1	是	是	是	0	0	0	0	0	0	0
454	2	9999	9999	1.6	70	9999	1	1	0	1	0	3	3	10	0	5	10	10	10	10	15	15	5	1	0	15	0	20	10	0	2	0	1	1	1	2	2	5	1	否	是	是	1	0	0	0	0	0	0
455	2	1	1	160	116	4	1	1	1	0	0	3	3	0	0	0	0	0	0	0	0	0	0	4	0	0	0	0	0	0	0	0	0	0	0	0	0	0	0	9999	9999	9999	0	0	0	0	0	0	0
456	2	9999	9999	1.67	67	9999	1	0	0	0	0	1	1	0	0	0	0	0	0	0	0	0	0	0	0	0	0	0	0	0	0	0	0	0	0	0	0	0	0	9999	9999	9999	0	0	0	0	0	0	0
457	2	1	1	1.6	60	2	1	0	0	1	0	2	2	0	0	0	0	0	0	0	0	0	0	0	0	0	0	0	0	0	0	0	0	0	0	0	0	0	0	否	是	否	1	0	0	0	0	0	0
458	1	9999	9999	1.71	80	9999	1	1	1	0	0	3	3	0	0	0	0	0	0	0	0	0	0	0	0	0	0	0	0	0	0	0	0	0	0	0	0	0	0	9999	9999	9999	0	0	0	0	0	0	0
459	2	9999	9999	1.5	49	9999	0	1	0	0	0	1	1	0	0	0	0	0	0	0	0	0	0	0	0	0	0	0	0	0	0	0	0	0	0	0	0	0	0	9999	9999	9999	0	0	0	0	0	0	0
460	2	9999	9999	1.57	51	9999	0	1	1	0	0	2	2	0	0	0	0	0	0	0	0	0	0	0	0	0	0	0	0	0	0	0	0	0	0	0	0	0	0	9999	9999	9999	0	0	0	0	0	0	0
461	2	9999	9999	1.62		9999	0	1	1	0	0	2	2	0	0	0	0	5	5	0	0	0	0	4	0	15	0	0	0	0	1	0	0	0	0	0	0	0	0	9999	9999	9999	0	0	0	0	0	0	0
462	1	9999	9999	1.74	85	9999	0	0	0	0	0	0	0	0	0	0	0	0	0	0	0	0	0	4	0	0	0	0	0	0	0	0	0	0	0	0	0	0	0	9999	9999	9999	0	0	0	0	0	0	0
463	1	9999	9999	1.72	60	9999	0	1	0	0	0	1	1	0	0	0	0	0	0	0	0	0	0	0	0	0	0	0	0	0	0	0	0	0	0	0	0	0	0	9999	9999	9999	0	0	0	0	0	0	0
464	1	9999	9999	1.65	50	9999	0	1	1	0	0	2	2	0	0	0	0	0	0	0	0	0	0	2	0	0	0	0	0	0	0	0	0	0	0	0	0	0	0	9999	9999	9999	0	0	0	0	0	0	0
465	1	9999	9999	1.74		9999	1	1	1	0	0	3	3	0	0	0	0	0	0	0	0	0	0	4	0	0	0	0	0	0	0	0	0	0	0	0	0	0	0	9999	9999	9999	0	0	0	0	0	0	0
466	1	9999	9999	1.55		9999	1	1	1	0	0	3	3	0	0	0	0	0	0	0	0	0	0	4	0	0	0	0	0	0	0	0	0	0	0	0	0	0	0	9999	9999	9999	0	0	0	0	0	0	0
467	1	9999	9999	1.75	70	9999	1	1	1	0	0	3	3	0	0	0	0	0	0	0	0	0	0	4	0	0	0	0	0	0	0	0	0	0	0	0	0	0	0	9999	9999	9999	0	0	0	0	0	0	0
468	1	9999	9999	1.75	80	9999	0	0	0	0	0	0	0	0	0	0	0	0	0	0	0	0	0	0	0	0	0	0	0	0	0	0	0	0	0	0	0	0	0	9999	9999	9999	0	0	0	0	0	0	0
469	1	9999	9999	1.75	62	9999	0	1	0	0	0	1	1	0	0	0	0	0	0	0	0	0	0	0	0	0	0	0	0	0	0	0	0	0	0	0	0	0	0	9999	9999	9999	0	0	0	0	0	0	0
470	1	9999	9999	1.7	70	9999	0	1	0	0	0	1	1	0	0	0	0	0	0	0	0	0	0	0	0	0	0	0	0	0	0	0	0	0	0	0	0	0	0	9999	9999	9999	0	0	0	0	0	0	0
471	1	9999	9999	1.8	90	9999	0	1	1	0	0	2	2	0	0	0	0	0	0	0	0	0	0	4	0	0	0	0	0	0	0	0	0	0	0	0	0	0	0	9999	9999	9999	0	0	0	0	0	0	0
472	1	9999	9999	1.75		9999	0	1	1	0	0	2	2	0	0	0	0	0	0	0	0	0	0	4	0	0	0	0	0	0	0	0	0	0	0	0	0	0	0	9999	9999	9999	0	0	0	0	0	0	0
473	1	9999	9999	1.73	57	9999	0	0	0	0	0	0	0	0	0	0	0	0	0	0	0	0	0	0	0	0	0	0	0	0	0	0	0	0	0	0	0	0	0	9999	9999	9999	0	0	0	0	0	0	0
474	1	1	2	1.7	75	2	1	0	0	0	0	1	1	0	0	0	0	0	0	0	0	0	0	0	0	0	0	0	0	0	0	0	0	0	0	0	0	0	0	是	是	是	0	0	0	0	0	0	0
475	1	9999	9999	165		9999	1	1	1	0	0	3	3	0	0	0	0	0	0	0	0	0	0	4	0	0	0	0	0	0	0	0	0	0	0	0	0	0	0	9999	9999	9999	0	0	0	0	0	0	0
476	2	9999	9999	1.65	70	9999	0	1	0	0	0	1	1	0	0	0	0	0	0	0	0	0	0	0	0	0	0	0	0	0	0	0	0	0	0	0	0	0	0	9999	9999	9999	0	0	0	0	0	0	0
478	1	9999	9999	1.73	70	9999	0	0	0	0	0	0	0	0	0	0	0	0	0	0	0	0	0	0	0	0	0	0	0	0	0	0	0	0	0	0	0	0	0	9999	9999	9999	0	0	0	0	0	0	0
479	1	9999	9999	1.66	90	9999	0	1	0	0	0	1	1	0	0	0	0	0	0	0	0	0	0	0	0	0	0	0	0	0	0	0	0	0	0	0	0	0	0	9999	9999	9999	0	0	0	0	0	0	0
480	2	9999	9999	1.53	41	9999	0	0	0	0	0	0	0	0	0	0	0	0	0	0	0	0	0	0	0	0	0	0	0	0	0	0	0	0	0	0	0	0	0	9999	9999	9999	0	0	0	0	0	0	0
481	2	1	1	1.5	46	4	0	0	1	1	1	3	3	10	5	5	10	10	10	10	15	15	5	1	0	15	15	20	10	0	3	2	1	2	1	2	2	4	1	是	否	否	1	0	1	1	0	0	0
482	2	1	1	1.6	55	4	1	1	0	0	0	2	2	0	0	0	0	0	0	0	0	0	0	4	0	0	0	0	0	0	0	0	0	0	0	0	0	0	0	是	是	是	0	0	0	0	0	0	0
483	2	9999	6	1.6	60	2	0	1	1	0	0	2	2	0	0	0	0	0	0	0	0	0	0	0	0	0	0	0	0	0	0	0	0	0	0	0	0	0	0	是	否	否	1	0	0	0	0	0	0
484	1	9999	6	170	65	1	0	1	1	1	0	3	3	5	0	0	10	10	10	5	10	10	0	2	0	15	15	0	10	0	3	0	0	0	1	2	2	1	2	否	是	否	1	1	1	1	1	1	1
485	1	1	1	1.72	75	2	0	1	0	0	0	1	1	0	0	0	0	0	0	0	0	0	0	0	0	0	0	0	0	0	0	0	0	0	0	0	0	0	0	是	是	否	1	1	1	1	1	1	1
486	1	9999	6	1.72	70	2	0	1	0	0	0	1	1	0	0	0	0	0	0	0	0	0	0	0	0	0	0	0	0	0	0	0	0	0	0	0	0	0	0	是	是	是	0	0	0	0	0	0	0
487	2	1	1	1.53	41	2	1	1	0	1	0	3	3	10	5	5	10	10	10	10	15	15	0	1	0	15	0	20	0	0	2	1	1	2	2	2	0	4	1	是	是	是	0	0	0	0	0	0	0
488	2	1	1	1.45	54	2	1	0	0	0	0	1	1	0	0	0	0	0	0	0	0	0	0	0	0	0	0	0	0	0	0	0	0	0	0	0	0	0	0	是	否	否	1	1	0	1	0	1	1
489	2	1	1	1.7	90	2	0	0	1	0	0	1	1	0	0	0	0	0	0	0	0	0	0	0	0	0	0	0	0	0	0	0	0	0	0	0	0	0	0	是	是	否	1	1	1	1	0	0	1
490	1	1	1	1.65	70	4	0	0	0	0	0	0	0	0	0	0	0	0	0	0	0	0	0	0	0	0	0	0	0	0	0	0	0	0	0	0	0	0	0	9999	9999	9999	0	0	0	0	0	0	0
491	2	1	2	1.64	60	3	1	0	0	0	0	1	1	0	0	0	0	0	0	0	0	0	0	0	0	0	0	0	0	0	0	0	0	0	0	0	0	0	0	是	是	是	0	0	0	0	0	0	0
492	1	1	6	1.75	100	4	0	0	0	1	0	1	1	0	0	0	0	0	0	0	0	0	0	0	0	0	0	0	0	0	0	0	0	0	0	0	0	0	0	否	否	否	1	0	0	0	0	0	0
493	1	1	1	1.75	90	2	1	1	1	1	1	5	3	0	0	0	0	5	5	0	5	5	0	3	0	15	30	0	10	0	3	3	1	1	1	1	1	4	0	是	是	否	1	1	1	1	1	0	1
494	2	1	6	1.57	65	2	1	0	0	0	0	1	1	0	0	0	0	0	0	0	0	0	0	0	0	0	0	0	0	0	0	0	0	0	0	0	0	0	0	是	是	是	0	0	0	0	0	0	0
495	1	1	6	1.72	75	2	1	0	0	0	0	1	1	0	0	0	0	0	0	0	0	0	0	0	0	0	0	0	0	0	0	0	0	0	0	0	0	0	0	是	是	是	0	0	0	0	0	0	0
496	1	1	1	1.68	61.5	4	0	0	1	1	0	2	2	5	0	5	10	10	10	10	15	15	0	1	0	15	15	20	10	0	3	5	2	1	2	1	1	3	1	否	是	否	1	0	1	1	1	1	1
497	2	1	6	1.55	56	2	0	0	0	0	0	0	0	0	0	0	0	0	0	0	0	0	0	0	0	0	0	0	0	0	0	0	0	0	0	0	0	0	0	是	否	否	1	0	0	0	1	0	0
498	1	1	1	1.65	70	2	1	1	1	1	0	4	3	0	0	0	0	5	5	5	10	10	0	3	0	15	30	20	10	15	3	0	1	0	0	2	2	4	1	否	否	否	1	0	0	0	0	0	1
499	2	1	3	1.55	80	2	1	0	0	0	0	1	1	0	0	0	0	0	0	0	0	0	0	0	0	0	0	0	0	0	0	0	0	0	0	0	0	0	0	是	否	否	1	1	1	1	0	0	0
500	1	1	1	1.65	65	4	0	1	1	1	0	3	3	0	0	0	0	0	0	0	0	0	0	4	0	0	0	0	0	0	0	0	0	0	0	0	0	0	0	否	否	否	1	0	0	0	0	0	1
501	1	1	1	1.7	90	4	1	1	1	1	0	4	3	5	0	5	10	10	10	10	15	10	0	1	0	15	30	0	10	15	3	0	1	1	1	2	2	5	1	是	是	是	0	0	0	0	0	0	0
502	2	1	1	1.6	68	4	1	0	0	1	0	2	2	0	0	0	0	0	0	0	0	0	0	0	0	0	0	0	0	0	0	0	0	0	0	0	0	0	0	是	否	否	1	1	0	1	0	0	1
503	1	1	1	1.8	90	4	1	0	0	0	1	2	2	10	5	5	10	5	10	10	15	15	10	0	0	15	0	20	10	0	2	0	2	2	2	2	2	5	1	是	否	否	1	0	0	1	1	0	1
505	2	1	1	1.45	44	2	0	0	0	0	0	0	0	0	0	0	0	0	0	0	0	0	0	0	0	0	0	0	0	0	0	0	0	0	0	0	0	0	0	是	是	是	0	0	0	0	0	0	0
506	2	1	1	1.5	64	2	0	0	0	0	0	0	0	0	0	0	0	0	0	0	0	0	0	0	0	0	0	0	0	0	0	0	0	0	0	0	0	0	0	是	是	是	0	0	0	0	0	0	0
507	2	1	1	1.5	70	2	0	0	0	0	0	0	0	0	0	0	0	0	0	0	0	0	0	0	0	0	0	0	0	0	0	0	0	0	0	0	0	0	0	是	是	是	0	0	0	0	0	0	0
508	2	1	1	1.4	59	2	1	1	0	0	0	2	2	5	0	0	5	10	10	5	10	10	0	2	0	15	30	20	10	15	3	3	1	1	1	1	1	3	1	是	是	是	0	0	0	0	0	0	0
509	2	1	1	1.48	71	2	1	0	0	0	0	1	1	0	0	0	0	0	0	0	0	0	0	0	0	0	0	0	0	0	0	0	0	0	0	0	0	0	0	是	是	是	0	0	0	0	0	0	0
510	2	1	1	1.53	41	2	0	1	0	0	0	1	1	0	0	0	0	0	0	0	0	0	0	0	0	0	0	0	0	0	0	0	0	0	0	0	0	0	0	是	是	是	0	0	0	0	0	0	0
511	2	1	3	1.55	46	2	1	0	0	0	0	1	1	0	0	0	0	0	0	0	0	0	0	0	0	0	0	0	0	0	0	0	0	0	0	0	0	0	0	是	是	是	0	0	0	0	0	0	0
512	2	1	1	1.6	61	2	1	0	0	0	0	1	1	0	0	0	0	0	0	0	0	0	0	0	0	0	0	0	0	0	0	0	0	0	0	0	0	0	0	是	是	是	0	0	0	0	0	0	0
513	1	1	6	1.76	60	2	1	1	1	0	1	4	3	0	0	5	10	10	10	10	15	10	0	1	15	0	15	0	10	15	3	4	1	1	1	1	1	4	1	是	是	是	0	0	0	0	0	0	0
514	2	1	1	1.65	85	2	0	0	0	0	0	0	0	0	0	0	0	0	0	0	0	0	0	0	0	0	0	0	0	0	0	0	0	0	0	0	0	0	0	是	是	是	0	0	0	0	0	0	0
515	2	1	6	1.58	40	2	1	0	0	0	0	1	1	0	0	0	0	0	0	0	0	0	0	0	0	0	0	0	0	0	0	0	0	0	0	0	0	0	0	是	是	是	0	0	0	0	0	0	0
516	1	1	1	1.68	65	2	0	0	0	0	0	0	0	0	0	0	0	0	0	0	0	0	0	0	0	0	0	0	0	0	0	0	0	0	0	0	0	0	0	是	是	是	0	0	0	0	0	0	0
517	1	1	6	1.58	55	4	1	1	1	1	0	4	3	0	0	0	5	10	10	5	5	5	0	3	0	15	30	20	10	15	3	0	1	1	1	2	1	4	1	是	否	否	1	0	0	1	1	1	1
518	1	1	4	1.55	70	2	0	0	0	1	0	1	1	0	0	0	0	0	0	0	0	0	0	0	0	0	0	0	0	0	0	0	0	0	0	0	0	0	0	是	是	是	0	0	0	0	0	0	0
519	2	1	3	1.59	72.5	2	1	0	0	0	0	1	1	0	0	0	0	0	0	0	0	0	0	0	0	0	0	0	0	0	0	0	0	0	0	0	0	0	0	是	是	是	0	0	0	0	0	0	0
520	2	1	2	1.58	60	4	1	0	0	1	1	3	3	10	5	5	10	10	10	10	15	15	10	0	0	15	15	0	20	0	3	5	1	2	2	1	1	4	1	是	是	是	0	0	0	0	0	0	0
521	2	1	6	1.56	56	2	0	0	0	1	1	2	2	10	5	5	10	10	10	10	15	15	10	0	0	15	0	0	0	0	1	3	2	2	2	2	2	5	1	是	是	是	0	0	0	0	0	0	0
522	2	1	2	1.58	60	2	0	0	0	0	0	0	0	0	0	0	0	0	0	0	0	0	0	0	0	0	0	0	0	0	0	0	0	0	0	0	0	0	0	是	是	是	0	0	0	0	0	0	0
523	2	1	6	1.5	61	4	1	0	0	0	0	1	1	0	0	0	0	0	0	0	0	0	0	0	0	0	0	0	0	0	0	0	0	0	0	0	0	0	0	是	是	是	0	0	0	0	0	0	0
524	2	1	6	1.58	50	4	1	1	1	1	0	4	3	0	0	0	0	10	10	5	10	5	0	3	0	15	30	0	10	15	3	0	1	0	1	2	2	4	1	是	否	是	1	0	0	0	0	0	0
525	2	1	6	1.6	65	2	0	0	0	0	0	0	0	0	0	0	0	0	0	0	0	0	0	0	0	0	0	0	0	0	0	0	0	0	0	0	0	0	0	是	是	是	0	0	0	0	0	0	0
526	1	1	6	1.68	70	2	0	0	0	0	0	0	0	0	0	0	0	0	0	0	0	0	0	0	0	0	0	0	0	0	0	0	0	0	0	0	0	0	0	是	是	是	0	0	0	0	0	0	0
527	2	1	2	1.62	65	4	0	1	1	0	0	2	2	0	0	0	0	0	0	0	0	0	0	4	0	15	0	20	0	0	2	0	0	0	0	2	2	5	1	否	否	否	1	0	0	0	0	0	0
528	2	1	2	1.6	55	4	0	1	1	0	0	2	2	10	0	5	10	10	10	10	15	10	0	1	0	0	15	0	20	0	2	0	1	1	1	1	2	3	1	否	是	否	1	0	1	1	1	0	0
529	2	1	2	1.64	66	4	1	0	0	0	0	1	1	0	0	0	0	0	0	0	0	0	0	0	0	0	0	0	0	0	0	0	0	0	0	0	0	0		否	是	否	1	0	1	1	0	0	0
530	2	1	2	1.67	60	2	0	0	0	0	0	0	0	0	0	0	0	0	0	0	0	0	0	0	0	0	0	0	0	0	0	0	0	0	0	0	0	0	0	是	是	否	1	0	1	1	1	1	0
531	1	1	2	1.69	75	2	0	0	0	0	1	1	1	0	0	0	0	0	0	0	0	0	0	0	0	0	0	0	0	0	0	0	0	0	0	0	0	0	0	是	是	是	0	0	0	0	0	0	0
532	2	1	2	1.59	41	4	0	0	0	0	0	0	0	0	0	0	0	0	0	0	0	0	0	0	0	0	0	0	0	0	0	0	0	0	0	0	0	0	0	否	是	否	1	1	1	1	1	1	1
533	2	1	2	1.6	60	2	0	0	0	0	0	0	0	0	0	0	0	0	0	0	0	0	0	0	0	0	0	0	0	0	0	0	0	0	0	0	0	0	0	是	是	是	0	0	0	0	0	0	0
534	1	1	2	1.75	92.5	2	0	0	0	0	0	0	0	0	0	0	0	0	0	0	0	0	0	0	0	0	0	0	0	0	0	0	0	0	0	0	0	0	0	是	是	是	0	0	0	0	0	0	0
535	1	1	1	1.6	70	2	1	0	0	0	0	1	1	0	0	0	0	0	0	0	0	0	0	0	0	0	0	0	0	0	0	0	0	0	0	0	0	0	0	是	是	否	1	1	1	1	1	1	1
536	1	1	6	1.65	45	4	1	0	0	0	1	2	2	10	0	5	10	10	10	10	15	10	5	1	0	15	0	20	10	0	2	0	1	1	1	2	2	4	1	是	是	是	0	0	0	0	0	0	0
537	2	1	6	1.63	85	2	1	0	0	0	0	1	1	0	0	0	0	0	0	0	0	0	0	0	0	0	0	0	0	0	0	0	0	0	0	0	0	0	0	是	是	是	0	0	0	0	0	0	0
538	2	1	1	1.47	45	4	1	0	0	0	0	1	1	0	0	0	0	0	0	0	0	0	0	0	0	0	0	0	0	0	0	0	0	0	0	0	0	0	0	是	是	是	0	0	0	0	0	0	0
539	2	1	6	1.62	75	2	1	1	1	0	0	3	3	5	0	5	5	10	10	0	5	5	0	2	15	15	30	20	0	0	3	0	1	1	1	2	2	3	1	否	否	否	1	0	0	0	1	1	1
540	2	1	6	1.5	40	2	1	0	0	1	1	3	3	10	0	5	5	10	10	10	15	15	5	1	0	15	0	20	0	0	2	0	2	1	2	2	2	5	1	是	是	是	0	0	0	0	0	0	0
542	1	1	6	1.69	65	2	0	0	0	0	0	0	0	0	0	0	0	0	0	0	0	0	0	0	0	0	0	0	0	0	0	0	0	0	0	0	0	0	0	是	是	是	0	0	0	0	0	0	0
543	2	1	6	1.58	55	2	1	0	0	0	1	2	2	10	5	5	10	10	10	10	15	15	10	0	0	15	0	0	0	0	1	0	2	2	2	2	2	5	1	是	是	是	0	0	0	0	0	0	0
544	2	1	6	1.6	50	2	1	1	1	0	1	4	3	5	0	5	5	10	10	5	10	10	0	2	0	15	30	20	10	0	3	2	1	1	1	1	1	3	1	是	是	是	0	0	0	0	0	0	0
545	1	1	6	1.78	70	2	0	0	0	0	0	0	0	0	0	0	0	0	0	0	0	0	0	0	0	0	0	0	0	0	0	0	0	0	0	0	0	0	0	是	是	是	0	0	0	0	0	0	0
546	2	1	6	1.6	65	2	1	1	0	0	0	2	2	10	0	5	5	10	10	10	15	10	0	1	0	15	15	0	10	0	2	0	1	1	1	2	2	4	1	是	是	是	0	0	0	0	0	0	0
547	2	1	6	1.6	55	4	1	1	1	0	0	3	3	10	0	5	5	10	10	10	10	10	0	1	15	15	15	20	10	0	3	0	1	1	1	2	2	4	1	是	是	是	0	0	0	0	0	0	0
548	2	1	1	1.6	70	4	1	1	1	1	0	4	3	0	0	0	0	0	0	0	0	0	0	0	0	0	0	0	0	0	0	0	0	0	0	0	0	0	0	否	否	否	1	1	1	1	1	1	1
549	2	1	1	1.8	65	2	0	0	0	0	1	1	1	0	0	0	0	0	0	0	0	0	0	0	0	0	0	0	0	0	0	0	0	0	0	0	0	0	0	是	是	是	0	0	0	0	0	0	0
550	2	1	1	1.55	56	2	0	1	1	1	0	3	3	0	0	0	0	0	0	0	0	0	0	0	0	0	0	0	0	0	0	0	0	0	0	0	0	0	0	是	是	是	0	0	0	0	0	0	0
552	2	1	2	1.63	52	4	0	0	0	0	0	0	0	0	0	0	0	0	0	0	0	0	0	0	0	0	0	0	0	0	0	0	0	0	0	0	0	0	0	是	是	否	1	1	1	1	1	1	1
554	2	1	4	1.5	60	4	1	0	0	0	1	2	2	0	0	0	0	0	0	0	0	0	0	0	0	0	0	0	0	0	0	0	0	0	0	0	0	0	0	是	是	是	0	0	0	0	0	0	0
[truncated: 118 more columns]

## Sheet: 1
SEQN	性别	民族	区县	身高	体重	学历	婚姻	FRAIL	ADL	Morse	VAS	EQ-5D	认知障碍初筛	MMSE	SPPB	营养不良初筛	MNA.SF	视力初筛	视力评估	听力初筛	听力得分	抑郁初筛	SAS	共病指数	年龄指数	社会支持初筛	照护者支持
15	1	1	3	1.8	75	2	4	4	2	3	0	1	1	0	0	0	0	0	0	0	0	1	0	4	4	0	1
16	1	1	3	1.8	75	2	4	2	0	0	0	0	0	0	0	0	0	0	0	0	0	1	0	3	4	0	1
17	2	1	3	1.64	60	2	4	3	4	1	0	1	1	1	0	0	0	0	0	0	0	1	2	1	3	0	1
18	2	1	3	1.55	56	0	4	1	0	0	0	0	1	1	0	0	0	0	0	0	0	1	0	0	4	0	1
19	2	1	3	1.6	60	0	4	2	4	1	0	1	1	1	0	0	0	0	0	0	0	1	0	1	4	0	1
20	1	1	3	1.7	61	2	2	3	2	2	0	1	1	1	0	1	1	0	0	0	0	1	0	1	4	0	1
21	2	1	3	1.58	65	0	2	3	2	2	6	1	1	1	0	0	0	0	0	1	3	1	0	1	4	0	1
22	1	1	3	1.7	55	0	4	1	0	0	0	0	1	0	1	0	0	0	0	1	3	1	0	2	4	0	1
23	2	1	3	1.58	62	0	4	2	2	2	5	1	1	1	0	0	0	0	0	0	0	1	0	1	3	0	1
26	1	1	6	1.6	70	0	1	1	4	0	0	0	1	1	0	0	0	0	0	1	6	1	0	2	3	0	1
27	1	1	6	1.65	60	0	1	0	4	0	0	0	0	0	0	0	0	0	0	0	0	1	0	3	3	0	1
28	1	1	6	1.75	65	1	1	0	4	0	0	0	1	1	0	0	0	0	0	0	0	1	0	3	3	0	1
29	1	1	6	1.6	80	0	1	1	4	0	0	0	0	0	0	0	0	9999	0	0	0	1	0	4	4	0	1
30	1	1	6	1.5	60	0	1	1	4	0	0	0	1	1	0	0	0	1	0	1	3	1	0	3	3	0	1
31	1	9999	6	1.65	70	1	1	2	0	0	0	0	1	1	1	0	0	1	0	1	6	1	0	5	4	0	1
32	1	1	6	1.71	73	2	1	0	0	0	0	0	1	0	0	0	0	1	1	1	3	1	0	4	3	0	1
33	1	1	6	1.7	80	0	1	2	0	0	0	0	1	1	0	1	1	0	0	1	3	1	0	10	3	0	1
34	1	1	6	1.6	57.5	0	1	2	0	1	2	1	0	0	0	0	0	1	0	0	0	1	0	3	3	0	1
35	1	1	6	1.65	60	0	1	3	0	0	0	0	1	0	1	0	0	0	0	1	4	1	0	5	3	0	1
36	1	1	6	1.6	65	0	1	2	1	1	0	1	1	0	0	1	1	1	2	1	6	1	0	4	3	0	1
37	2	1	1	1.49	61	3	2	0	0	0	0	0	1	0	0	0	0	0	0	0	0	1	0	6	4	0	1
38	2	1	1	1.56	73	4	2	0	0	0	0	0	1	1	0	0	0	9999	0	9999	0	1	0	4	3	0	1
39	1	1	1	1.8	95	2	2	2	0	1	0	1	0	0	0	0	0	1	1	0	0	1	0	0	3	9999	1
40	1	1	1	1.73	62	3	2	1	0	0	0	1	0	0	0	0	0	1	2	1	3	1	0	3	3	0	1
41	2	1	1	1.6	55	0	4	2	0	1	2	1	0	0	0	0	0	1	2	1	4	1	0	7	3	0	1
42	2	1	1	1.58	51	3	2	0	0	0	0	0	1	0	1	0	0	1	2	1	4	1	0	5	4	0	1
43	1	1	1	1.72	51	5	2	0	0	0	0	0	0	0	0	1	1	1	0	1	6	1	0	5	4	0	1
44	2	1	1	1.58	70	1	2	1	0	0	0	0	1	1	1	0	0	1	2	9999	0	1	0	6	3	0	1
45	1	1	1	1.63	80	2	2	0	0	0	0	0	0	0	0	0	0	1	1	1	4	1	0	4	3	0	1
46	2	1	1	1.47	60	1	4	2	0	2	2	1	1	0	0	0	0	1	1	1	3	1	0	6	4	0	1
47	2	1	1	1.66	75	0	2	1	0	0	0	0	0	0	0	0	0	0	0	0	0	0	0	0	3	0	1
48	1	1	1	1.66	135	5	4	3	1	0	8	1	0	0	0	0	0	1	2	0	0	1	0	7	4	0	1
49	1	1	1	1.6	65	4	2	0	0	0	0	0	0	0	0	0	0	0	0	9999	0	1	0	7	4	0	1
50	2	1	1	1.65	75	1	4	2	0	0	0	1	0	0	1	0	0	0	0	0	0	1	0	1	3	1	1
51	2	1	1	1.55	67	3	2	1	0	0	0	0	1	0	0	0	0	1	1	1	5	1	1	4	4	0	1
52	1	1	1	1.7	65	5	2	0	0	0	0	0	1	0	0	0	0	0	0	1	3	1	1	4	4	0	1
55	1	1	1	1.69	64.9	2	2	1	0	0	0	0	0	0	0	1	0	1	0	0	0	1	0	1	3	0	1
57	2	1	1	1.57	70.3	2	4	2	0	0	1	1	0	0	0	0	0	0	0	0	0	1	0	1	3	0	1
58	1	1	1	1.73	61.3	2	2	0	0	0	0	0	0	0	0	0	0	0	0	0	0	1	0	0	4	0	1
59	1	1	1	1.5	62.2	1	4	3	0	0	0	0	1	1	1	0	0	0	0	1	3	1	0	0	3	0	1
60	2	1	1	1.59	67	2	2	1	0	0	0	0	0	0	0	0	0	0	0	0	0	1	0	0	3	0	1
61	1	1	1	1.7	71	1	2	0	0	0	0	0	0	0	0	0	0	0	0	0	0	1	0	0	3	0	1
62	1	1	6	1.65	75	0	1	3	0	0	0	0	0	0	0	0	0	0	0	0	0	1	0	3	3	0	1
63	1	1	1	1.65	65	0	2	0	0	0	0	0	0	0	1	0	0	0	0	0	0	1	0	0	3	0	1
64	1	1	6	1.7	73	0	1	3	4	3	3	1	0	0	0	1	1	0	0	0	0	1	0	3	3	0	1
66	1	1	1	1.66	70	3	4	1	0	0	0	0	0	0	0	0	0	0	0	0	0	1	0	0	4	0	1
67	2	1	1	1.6	56	0	4	2	0	0	0	0	1	1	0	0	0	0	0	1	6	1	0	1	4	0	1
68	1	1	3	1.67	60	2	2	0	0	0	0	0	0	0	1	1	1	0	0	0	0	1	0	0	3	0	1
69	1	1	1	1.7	70	2	2	2	1	1	0	1	0	0	1	0	0	0	0	0	0	1	0	1	4	0	1
70	2	1	1	1.68	60	3	4	0	0	0	0	1	0	0	0	0	0	0	0	0	0	1	0	0	4	1	1
71	2	1	1	1.5	65	2	2	1	0	0	0	0	0	0	1	0	0	1	1	0	0	1	0	0	3	0	1
72	2	1	1	1.55	60	0	4	0	0	0	0	0	0	0	0	0	0	0	0	0	0	1	0	0	4	0	1
73	2	1	2	1.6	60	0	4	1	0	0	0	0	0	0	0	1	1	0	0	1	5	1	0	0	4	0	0
75	1	9999	1	1.68	67	3	2	0	0	0	0	0	0	0	0	0	0	0	0	0	0	1	0	0	4	0	0
76	2	1	1	1.52	64	1	2	0	0	0	0	0	0	0	0	0	0	0	0	0	0	1	0	0	3	0	0
77	1	1	1	1.47	60	1	2	0	0	0	0	0	0	0	0	0	0	0	0	0	0	1	0	0	3	0	0
78	1	1	1	1.76	60	3	2	0	0	0	0	0	0	0	0	1	0	0	0	0	0	1	0	0	4	0	0
79	1	1	1	1.62	74.3	1	2	0	0	0	0	0	0	0	0	0	0	0	0	0	0	1	0	1	3	0	1
80	2	1	1	1.55	120	2	4	0	0	0	0	0	0	0	1	1	1	0	0	0	0	1	0	0	4	0	0
81	2	1	1	1.55	70.8	1	2	0	0	0	0	0	0	0	0	0	0	0	0	0	0	1	0	0	4	0	1
82	2	1	1	1.6	50	0	2	2	0	0	0	0	1	0	0	0	0	1	0	0	0	1	0	2	4	0	0
83	1	1	1	1.6	65	3	2	0	0	0	0	0	0	0	0	0	0	0	0	0	0	1	0	1	4	0	0
84	2	1	1	1.53	57.3	0	4	0	0	0	0	0	0	0	0	0	0	0	0	0	0	1	0	1	4	0	1
85	1	1	3	1.75	80	2	4	0		0	0	0	0	0	1	0	0	1	0	1	5	1	0	1	4	0	0
88	2	1	3	1.6	50	0	4	2	1	3	1	1	1	1	1	1	1	1	2	1	4	1	0	1	3	0	1
89	2	1	1	1.57	65	1	2	2	0	2	5	1	1	1	0	0	0	1	1	0	0	1	0	4	3	0	0
90	1	1	1	1.65	63	1	2	4	1	2	2	1	1	0	0	0	0	1	1	0	0	1	0	5	4	0	0
91	2	1	1	1.6	58	4	4	3	0	0	0	0	1	1	0	1	1	1	1	1	3	1	0	4	4	0	0
92	1	1	1	1.7	82	3	3	0	0	0	0	0	0	0	0	0	0	0	0	0	0	1	0	2	3	0	0
93	2	2	1	1.56	57	2	4	0	0	0	0	0	0	0	0	1	1	0	0	0	0	1	0	0	4	0	0
94	1	1	1	1.56	115	2	2	3	1	2	3	1	0	0	1	1	1	1	1	1	4	1	0	0	4	0	1
95	1	1	1	1.67	90	2	2	0	0	0	0	0	0	0	1	0	0	0	0	0	0	1	0	0	3	0	1
96	2	1	1	1.42	39.5	1	2	0	0	0	0	0	0	0	1	0	0	0	0	0	0	1	0	0	3	0	0
97	1	1	1	1.65	96.2	3	2	1	0	0	0	0	0	0	0	0	0	0	0	0	0	1	0	0	3	0	1
98	2	1	1	1.52	62.3	2	2	3	4	3	3	2	1	0	1	0	0	0	0	1	6	1	0	2	3	0	1
99	2	1	1	1.6	50	3	2	0	0	0	0	0	0	0	0	0	0	1	1	0	0	1	0	0	0	0	0
101	1	1	1	1.7	80	2	2	1	0	0	0	0	1	0	0	0	0	0	0	0	0	1	0	0	3	0	0
102	1	1	1	1.68	70	2	2	5	0	3	5	2	1	1	0	1	1	0	0	0	0	1	0	1	4	0	1
103	2	1	1	1.55	75	1	2	0	0	0	0	0	0	0	0	0	0	0	0	0	0	1	0	0	3	0	0
104	2	1	3	1.52	44	1	2	1	0	0	0	1	0	0	0	0	0	0	0	1	3	1	0	1	3	0	0
105	2	1	1	1.62	75	1	2	4	2	2	0	1	0	0	1	1	1	0	0	0	0	1	0	0	3	0	0
106	1	1	3	1.63	60	1	4	3	1	1	0	1	1	0	0	1	1	0	0	1	6	1	0	2	3	0	1
107	1	1	3	1.72	70	1	4	2	0	0	0	0	1	1	0	1	1	0	0	1	6	1	0	0	4	0	1
108	1	1	3	1.6	60	0	4	1	0	0	0	0	1	0	1	0	0	0	0	1	4	1	0	2	3	0	1
109	1	1	3	170	70	1	4	0	0	0	0	0	1	0	1	0	0	0	0	1	4	1	0	0	4	0	0
110	1	1	1	1.7	65	5	2	0	0	0	0	0	0	0	0	0	0	0	0	0	0	1	0	0	4	0	0
111	1	1	1	1.6	60	2	2	1	0	0	0	0	0	0	0	1	1	0	0	0	0	1	0	2	4	0	0
112	2	1	1	1.53	60	2	2	1	0	0	0	0	0	0	0	0	0	0	0	0	0	1	0	0	3	0	0
113	2	1	3	1.58	60	0	4	2	4	0	2	1	1	1	0	0	0	0	0	1	4	1	0	1	4	0	1
114	1	1	3	1.6	65	0	4	3	4	1	0	1	1	1	0	0	0	0	0	1	4	1	0	4	4	1	1
115	2	1	1	1.55	54	0	4	1	0	0	0	0	0	0	0	0	0	0	0	0	0	1	0	1	4	0	0
116	2	1	3	160	65	0	3	2	4	0	0	1	1	0	0	0	0	0	0	1	6	1	0	0	3	0	0
117	2	1	3	1.55	50	0	4	2	0	0	0	0	1	0	0	0	0	0	0	1	4	1	0	5	4	0	1
118	1	1	3	168	70	0	2	0	0	0	0	0	1	0	0	0	0	0	0	1	3	1	0	0	4	0	0
119	2	1	3	1.48	40	0	4	2	0	0	0	0	1	1	0	0	0	0	0	1	3	1	0	5	3	0	1
120	1	1	3	170	63	3	4	0	0	0	0	0	0	0	0	0	0	0	0	1	4	1	0	0	4	0	0
121	2	1	3	1.55	60	1	4	0	0	0	0	0	0	0	0	0	0	0	0	0	0	1	0	2	4	0	1
122	2	1	3	155	60	0	3	2	4	1	0	1	0	1	0	0	0	0	0	1	4	1	0	0	4	1	0
123	2	1	1	1.5	55	3	2	4	1	3	2	1	0	0	1	0	0	1	2	1	6	1	0	3	4	0	0
124	1	1	3	165	65	3	4	2	0	0	0	0	1	0	0	0	0	0	0	1	3	1	0	0	4	0	0
125	1	1	3	1.77	70	0	4	2	0	0	0	0	1	1	0	0	0	0	0	0	0	1	0	2	3	0	1
126	2	1	3	155	60	0	4	2	2	1	0	1	1	1	1	0	0	0	0	1	4	1	0	0	4	1	0
127	2	1	3	1.55	50	0	4	2	4	1	0	2	1	0	0	0	0	1	2	1	3	1	0	3	4	0	1
128	1	1	3	158	55	3	4	2	4	0	2	1	1	1	0	0	0	0	0	1	4	1	0	0	4	1	0
129	2	1	1	1.52	50	0	4	0	0	0	0	0	0	0	0	1	0	0	0	0	0	1	0	0	4	0	0
130	2	1	1	1.65	68	3	2	0	0	0	0	0	0	0	0	0	0	0	0	0	0	1	0	0	4	0	0
131	1	1	1	1.65	58	2	2	1	0	0	0	0	0	0	0	9999	0	0	0	0	0	1	0	0	3	0	0
132	2	1	1	1.56	43	2	2	3	0	0	0	0	0	0	0	0	0	1	2	0	0	1	0	0	3	0	0
133	1	1	1	1.74	50	2	2	2	0	0	0	0	1	1	0	1	1	0	0	1	3	1	0	2	4	0	1
134	1	1	2	1.63	66	1	2	0	0	0	0	0	0	0	0	0	0	1	0	1	3	1	0	0	4	0	0
135	2	1	2	1.5	67	1	2	0	0	0	0	0	0	0	0	0	0	1	0	0	0	1	0	0	4	0	0
136	1	1	1	1.76	60	4	2	0	0	0	0	0	0	0	0	0	0	0	0	1	3	1	0	1	4	0	0
137	2	1	1	1.56	72	1	4	2	1	3	2	1	0	0	1	1	1	1	1	1	4	1	0	0	4	0	0
138	1	1	1	1.7	80	1	4	0	0	0	0	0	0	0	0	0	0	0	0	0	0	1	0	0	4	0	0
140	2	1	1	1.75	55	2	4	5	4	2	2	1	0	0	0	1	1	1	1	0	0	1	0	2	4	0	0
141	1	1	1	1.7	60	1	4	0	0	0	0	0	0	0	0	0	0	0	0	0	0	1	0	0	4	0	0
142	1	1	1	1.68	70	1	2	0	0	0	0	0	0	0	0	0	0	0	0	0	0	1	0	0	4	0	0
143	2	1	1	1.53	60	0	2	1	0	0	0	0	0	0	0	0	0	0	0	0	0	1	0	0	4	0	0
144	2	1	1	1.63	77	3	2	0	0	0	0	0	0	0	0	0	0	0	0	0	0	1	0	1	3	0	0
145	2	1	1	1.52	65	0	2	0	0	0	0	0	0	0	0	0	0	0	0	0	0	1	0	0	4	0	0
146	2	9999	9999	150	125	1	4	3	0	0	0	0	0	0	0	0	0	9999	0	9999	0	0	0	0	4	0	0
147	2	1	1	1.53	65	0	2	0	0	0	0	0	0	0	0	0	0	0	0	0	0	1	0	0	4	0	0
148	2	1	1	1.53	65	1	2	4	2	2	2	1	0	0	0	0	0	1	1	1	4	1	0	0	4	0	0
149	2	1	1	1.52	65	0	4	2	1	2	0	1	0	0	0	0	0	0	0	0	0	1	0	1	4	0	0
150	2	1	1	1.5	64	1	2	0	0	0	0	0	0	0	0	0	0	0	0	0	0	1	0	0	4	0	0
151	2	1	1	1.54	62	0	4	0	0	0	0	0	0	0	0	1	0	0	0	0	0	1	0	0	4	0	0
152	1	1	1	1.58	55	0	4	1	0	0	0	0	0	0	0	0	0	0	0	0	0	1	0	0	4	0	0
153	1	1	1	1.73	83	1	2	0	0	0	0	0	0	0	0	0	0	0	0	1	3	1	0	0	4	0	0
154	1	1	1	1.6	55	0	4	1	0	0	0	0	0	0	0	0	0	0	0	0	0	1	0	0	3	0	0
155	2	1	1	1.67	76	1	2	0	0	0	0	0	0	0	0	0	0	0	0	0	0	1	0	0	3	0	0
156	1	1	1	1.72	70	0	3	0	0	0	0	0	0	0	0	0	0	0	0	0	0	1	0	0	3	0	0
157	2	1	1	1.62	75	0	2	1	0	0	0	0	0	0	0	0	0	0	0	0	0	1	0	0	4	0	0
158	2	1	1	1.5	72	0	4	3	1	3	4	1	0	0	0	0	0	0	0	0	0	1	0	7	4	9999	0
159	2	1	1	1.53	56	0	2	2	1	2	0	1	0	1	1	0	0	0	0	0	0	1	0	0	0	0	0
160	2	1	1	1.53	57	0	4	0	0	0	0	0	0	0	0	0	0	0	0	0	0	1	0	1	3	0	0
161	2	1	1	1.5	79	0	2	1	0	0	0	0	0	0	0	0	0	9999	0	0	0	1	0	0	3	0	0
162	2	1	1	1.5	79	0	2	1	0	0	0	0	0	0	0	0	0	0	0	0	0	1	0	1	3	0	0
163	1	1	1	1.6	62	1	2	1	0	0	0	0	0	0	0	0	0	0	0	0	0	1	0	1	4	0	0
164	2	1	1	1.58	70.2	1	2	0	0	0	0	0	0	0	0	0	0	0	0	0	0	1	0	0	3	0	0
165	1	1	1	1.66	74.5	5	2	0	0	0	0	0	0	0	0	0	0	0	0	0	0	1	0	0	4	0	0
166	1	1	1	1.65	60.7	1	4	1	0	0	0	0	0	0	0	0	1	0	0	0	0	1	0	0	4	0	0
167	2	1	1	1.5	90	1	4	0	0	0	0	0	0	0	1	0	0	1	1	1	3	1	0	0	4	0	0
168	1	1	1	1.82	90	3	2	1	0	0	0	0	0	0	0	9999	0	9999	0	9999	0	0	0	0	0	0	0
169	1	1	1	1.82	80	2	2	1	0	0	0	0	0	0	0	0	0	9999	0	9999	0	0	0	0	3	0	0
172	2	1	1	1.58	58	0	4	0	0	0	0	0	0	0	0	0	0	9999	0	9999	0	0	0	0	0	0	0
173	2	1	1	1.55	36	9999	4	2	0	0	0	0	0	0	1	0	0	9999	0	9999	0	0	0	0	0	0	0
174	2	1	1	1.55	52	0	4	2	0	2	3	0	0	0	0	1	1	1	0	0	0	1	0	2	4	1	0
175	1	1	3	1.7	65	2	2	1	0	0	0	0	0	0	0	0	0	0	0	1	6	1	0	1	3	0	0
176	2	1	1	1.6	72	2	4	0	0	0	0	0	0	0	0	0	0	0	0	1	3	1	0	0	3	0	0
177	1	1	3	1.65	55	2	4	1	0	1	0	1	0	0	0	1	1	1	0	0	0	1	0	3	3	0	0
178	1	1	3	1.57	60	0	4	0	0	0	0	0	1	0	1	0	0	0	0	1	5	1	0	1	4	0	0
179	1	1	3	1.54	70	1	4	2	4	2	0	1	1	1	0	0	0	1	2	0	0	1	0	1	4	1	0
180	2	1	3	1.5	75	0	4	2	0	0	0	0	1	0	0	0	0	0	0	1	4	1	0	1	4	0	0
181	2	1	3	1.6	75	0	2	2	0	0	0	0	1	1	0	0	0	0	0	0	0	1	0	4	3	0	0
182	1	1	3	1.54	55	1	4	2	0	0	0	0	1	0	1	0	0	0	0	1	4	1	0	2	3	0	0
183	2	1	1	1.56	45	0	2	4	2	3	3	1	0	0	1	1	1	1	2	1	3	1	0	8	4	0	0
184	1	1	3	1.4	50	1	4	4	4	2	5	2	1	1	0	1	1	0	0	1	6	1	0	2	3	1	0
185	1	1	1	1.73	70	1	2	0	0	0	0	0	0	0	0	0	0	0	0	1	5	1	0	0	4	0	0
186	2	1	1	1.62	68	1	2	1	0	0	0	0	0	0	0	0	0	0	0	0	0	1	0	0	4	0	0
187	1	1	3	1.57	52	0	1	0	0	0	0	0	1	1	0	0	0	0	0	0	0	1	0	0	3	0	0
188	1	1	3	1.58	53	1	2	1	0	0	0	0	0	0	0	0	0	0	0	0	0	1	0	0	3	0	0
189	2	1	3	1.5	55	0	2	1	0	0	0	0	1	0	0	0	0	0	0	0	0	1	0	0	3	0	0
190	2	1	3	1.58	45	0	4	3	3	2	5	2	1	1	0	0	0	0	0	0	0	1	0	0	4	1	0
191	2	1	3	1.4	74	0	4	2	0	0	0	0	1	0	1	0	0	1	2	1	3	1	0	0	4	0	0
192	1	1	3	1.58	51	1	4	2	0	0	0	0	1	1	1	0	0	0	0	0	0	1	0	0	4	0	0
193	1	1	3	1.6	72	0	4	2	0	0	0	0	1	0	1	0	0	0	0	0	0	1	0	0	3	0	0
194	1	9999	3	1.52	64	1	4	1	0	0	0	0	1	1	0	1	1	1	1	1	4	1	0	1	3	0	0
195	1	1	3	1.66	68	1	4	0	0	0	0	0	0	0	1	0	0	1	2	0	0	1	0	0	4	0	0
196	2	1	3	1.52	56	0	4	0	0	0	0	0	1	1	0	0	0	0	0	0	0	1	0	0	4	0	0
197	2	1	3	1.4	50	2	4	2	0	0	0	0	0	0	1	0	0	0	0	0	0	1	0	1	3	0	0
198	1	1	3	1.58	67	1	4	0	0	0	0	0	0	0	1	0	0	0	0	0	0	1	0	1	3	0	0
199	1	1	6	1.7	70	3	2	2	0	1	0	1	0	0	0	0	0	0	0	1	6	1	0	4	3	0	0
200	2	1	6	1.6	65	1	4	1	0	0	0	0	0	0	0	0	0	0	0	1	3	1	0	4	4	0	0
201	1	1	1	1.73	76	2	2	0	0	0	0	0	0	0	0	0	0	0	0	0	0	1	0	0	3	0	0
202	2	1	1	1.56	55	1	4	3	1	3	10	2	1	0	0	0	0	1	2	0	0	1	1	0	0	9999	0
203	1	1	1	1.6	58	5	2	0	0	0	0	0	0	0	0	0	0	0	0	0	0	1	0	5	4	0	0
204	2	1	2	1.37	42.5	0	4	3	2	3	5	2	1	1	0	0	0	1	2	1	4	1	1	4	4	0	0
205	2	1	1	1.64	68	3	4	2	1	1	3	1	1	0	1	0	0	1	1	1	2	1	0	1	4	0	0
206	2	1	2	1.53	32	5	2	2	0	0	0	0	0	0	0	0	0	0	0	0	0	1	0	5	4	0	1
207	1	1	1	1.7	70	3	2	1	1	1	0	1	1	0	1	1	0	1	1	0	0	1	0	6	4	0	0
208	2	1	2	1.62	55	0	4	2	0	1	2	1	0	0	1	1	1	1	1	0	0	1	0	3	3	0	0
209	2	1	1	1.5	70	3	2	2	0	0	2	1	0		0	1	1	0	0	1	3	1	0	5	4	1	1
210	2	1	1	1.55	80	4	2	4	4	3	3	2	0	0	0	0	0	0	0	0	0	1	0	3	3	0	1
211	1	1	1	1.65	70	5	2	1	0	0	0	0	0	0	0	0	0	0	0	0	0	1	0	5	4	0	1
212	2	1	1	1.6	60	4	2	0	0	0	0	0	0	0	0	0	0	0	0	0	0	1	0	3	3	0	0
215	1	1	1	1.8	70	1	2	3	1	0	0	1	1	0	1	1	0	1	2	1	3	1	0	6	4	1	1
216	2	1	1	1.6	70	0	2	5	4	3	9	2	1	1	0	9999	1	1	2	1	3	1	0	7	4	1	1
218	1	1	1	1.8	85	3	2	0	0	0	0	0	0	0	0	0	0	0	0	0	0	1	0	3	3	0	0
219	1	1	1	1.74	65	4	2	0	0	0	0	0	0	0	0	1	0	1	1	1	3	1	0	4	4	0	0
220	1	1	1	1.68	70	4	2	0	0	0	0	0	0	0	0	0	0	0	0	0	0	0	0	4	4	0	0
221	2	1	1	1.63	55	3	2	1	0	0	0	0	0	0	0	1	1	1	0	0	0	1	0	4	3	0	0
222	1	1	1	1.76	73	1	2	0	0	0	0	0	0	0	0	9999	0	9999	0	9999	0	0	0	4	4	0	0
223	2	1	1	1.6	65	0	2	1	0	0	0	0	0	0	0	9999	0	9999	0	9999	0	0	0	4	4	0	0
224	2	1	1	1.68	60	3	2	4	1	3	5	1	1	0	1	1		0	0	9999	0	0	0	0	0	9999	0
225	2	1	1	1.6	50	2	2	2	1	1	1	1	1	1	0	1	1	0	0	0	0	1	2	4	4	0	0
226	1	1	2	1.68	50	0	4	3	1	2	0	1	1	1	1	0	0	0	0	0	0	1	0	1	4	0	0
228	1	1	1	1.74	140	4	2	1	0	3	0	1	0	0	1	9999	0	0	0	1	3	1	0	7	4	0	0
229	2	1	1	1.57	51	2	2	3	0	0	0	0	1	1	1	9999	0	1	0	1	4	1	0	6	4	0	0
230	1	1	1	1.7	75	5	4	2	1	1	0	1	1	1	1	9999	0	1	1	1	3	1	0	5	4	0	1
231	2	1	1	1.6	50	2	2	2	1	1	0	1	1	1	1	9999	0	0	0	1	5	1	0	4	4	0	0
232	1	1	1	1.65	60	2	2	3	1	2	0	1	0	0	1	0	0	0	0	1	4	1	0	3	4	0	0
233	1	1	1	1.65	69	2	2	3	1	2	0	1	0	0	0	1	1	1	1	0	0	1	0	1	4	1	0
234	2	1	1	1.48	55	2	2	0	0	0	0	0	1	1	0	0	0	0	0	0	0	1	0	0	3	0	0
236	1	1	1	1.7	65	1	2	2	0	0	0	0	0	0	0	0	0	0	0	1	6	1	0	1	3	0	1
237	2	1	2	1.6	40	0	4	3	1	0	0	0	0	0	1	0	0	0	0	0	0	1	0	0	4	0	1
238	1	1	1	1.67	60	0	2	0	0	0	0	0	0	0	1	0	0	1	2	1	3	1	0	4	3	0	0
239	1	1	1	1.75	85	1	4	0	0	0	0	0	0	0	1	1	1	1	1	0	0	1	0	0	4	0	0
240	1	1	1	1.72	71	2	4	1	1	2	0	1	0	0	0	1	1	1	0	0	0	1	0	0	4	0	0
241	2	1	1	1.55	41	1	4	0	0	0	0	0	0	0	0	1	0	1	1	0	0	1	0	0	4	0	0
242	2	1	1	1.5	45	0	4	3	0	0	0	0	0	0	1	0	0	0	0	0	0	1	0	1	4	0	0
243	2	1	2	1.55	50	2	2	0	0	0	0	0	0	0	0	0	0	1	2	0	0	1	0	1	3	0	0
244	1	1	2	170	80	0	1	0	0	0	0	0	1	0	1	0	0	1	1	1	4	1	0	0	3	0	0
245	1	1	2	1.7	70	1	3	0	0	0	0	0	1	1	0	0	0	1	2	1	3	1	0	2	3	0	0
246	1	1	2	1.75	70	2	4	0	0	0	0	0	1	1	0	0	0	1	2	1	3	1	0	1	4	0	0
247	2	1	2	1.6	90	0	4	1	0	0	0	0	1	1	1	0	0	1	1	1	3	1	0	2	4	0	0
248	1	1	2	1.6	60	2	4	1	0	0	0	0	1	0	0	1	0	0	0	1	4	1	0	1	4	0	0
249	1	1	2	1.73	70	1	4	1	0	0	0	0	1	0	1	0	0	1	1	1	5	1	0	3	3	0	0
250	1	1	2	1.6	80	0	1	0	1	2	2	1	1	0	1	0	0	0	0	1	3	1	0	0	3	1	0
251	1	1	2	1.75	70	2	2	3	4	2	2	2	1	1	0	0	0	1	0	1	3	1	0	4	3	0	0
252	2	1	2	1.6	60	1	4	1	0	0	0	0	1	0	1	0	0	0	1	1	5	1	0	0	4	0	0
253	1	9999	2	175	75	2	4	0	0	0	0	0	1	0	1	1	0	0	0	1	5	1	0	3	3	0	0
254	1	1	2	1.68	56	5	4	0	0	0	0	0	1	0	0	0	0	1	1	1	6	1	0	1	4	0	0
255	2	1	2	1.57	50	1	4	1	0	0	0	0	1	0	0	0	0	1	1	1	4	1	0	0	4	0	0
256	2	1	2	1.65	65	1	4	0	0	0	0	0	1	1	0	0	0	1	1	1	4	1	0	1	4	0	0
257	2	1	2	1.5	60	0	1	2	4	1	2	1	1	1	1	0	0	1	2	1	3	1	0	0	4	0	0
258	1	1	2	1.74	70	1	4	0	0	0	0	0	1	1	0	0	0	1	1	1	4	1	0	0	4	0	0
259	2	1	2	1.55	50	0	4	2	4	2	5	1	1	0	0	0	0	0	0	1	4	1	0	3	3	0	0
260	2	1	2	1.6	60	4	4	0	3	2	0	2	1	1	1	0	0	0	0	1	4	1	0	1	3	0	0
261	1	1	1	1.67	60	0	2	0	0	0	0	0	0	0	1	0	0	1	1	1	3	1	0	1	3	0	0
262	2	1	2	1.63	60	0	2	0	0	0	0	0	1	0	0	0	0	0	0	1	3	1	0	2	4	0	0
263	2	1	2	1.6	80	0	4	2	3	3	2	1	1	1	0	0	0	1	2	1	3	1	0	2	4	0	0
264	1	1	1	1.72	71	2	4	0	1	1	0	1	0	0	0	0	0	1	0	0	0	1	0	0	4	0	0
265	2	1	1	1.65	68	0	4	2	0	0	0	0	1	0	0	1	0	1	1	1	4	1	0	2	4	0	0
266	1	1	1	1.75	75	1	4	1	4	0	0	0	1	1	1	1	0	0	0	1	6	1	0	1	4	0	0
267	1	1	1	1.75	78	1	4	1	0	0	0	0	1	0	1	0	0	0	0	1	5	1	0	1	4	0	0
268	2	1	1	1.5	130	0	4	2	0	0	0	1	0	0	0	0	0	9999	0	9999	0	0	0	0	0	0	0
269	1	1	3	1.6	165	0	1	2	4	1	5	1	1	0	1	0	0	0	0	0	0	1	0	2	3	0	1
270	2	1	3	1.6	70	0	4	2	0	0	0	0	1	1	0	0	0	0	0	1	4	1	0	2	4	0	1
271	2	1	3	1.5	60	1	2	0	0	0	0	0	1	0	0	0	0	0	0	1	3	1	0	2	4	0	1
272	1	1	3	1.7	85	0	2	2	0	0	0	0	1	1	0	0	0	0	0	1	3	1	0	1	4	0	1
273	2	1	3	1.55	70	0	2	0	0	0	0	0	1	1	1	0	0	0	0	1	3	1	0	2	3	0	1
274	1	1	3	1.7	75	1	4	0	0	0	0	0	0	0	1	0	0	0	0	1	3	1	0	1	3	0	1
275	2	1	2	1.52	75	0	4	3	3	3	4	2	1	1	0	0	0	0	0	1	1	1	0	7	4	1	1
276	2	1	1	1.55	60	0	4	4	0	0	0	0	0	0	1	1	1	0	0	1	6	1	0	10	4	0	0
277	2	1	2	1.5	52	1	4	0	0	0	0	0	0	0	0	0	0	1	1	1	6	1	0	1	4	0	0
278	2	1	1	1.55	38	3	2	1	0	0	0	0	1	0	0	1	1	0	0	0	0	1	0	7	3	0	0
279	1	1	1	1.76	65	5	2	2	0	1	0	1	1	1	1	0	0	1	0	1	5	1	0	4	4	0	0
280	2	1	1	1.67	70	3	2	2	1	3	2	1	0	0	1	1	1	0	0	1	6	1	0	7	4	0	0
281	1	1	1	1.67	65	1	1	0	0	0	0	0	1	0	0	0	0	0	0	1	4	1	0	3	3	0	0
282	2	1	1	1.47	62	2	2	1	0	0	0	0	1	0	0	0	0	0	0	0	0	1	0	3	3	0	0
283	1	1	6	1.7	72	0	2	0	0	0	0	1	0	0	0	0	0	0	0	0	0	1	0	3	3	0	0
284	2	1	2	1.6	80	1	4	0	0	0	0	0	0	0	0	0	0	1	1	0	0	1	0	0	3	0	0
285	1	1	2	1.7	70	1	4	1	0	0	0	0	1	0	0	0	0	1	1	0	0	1	0	6	3	0	0
286	2	1	2	1.66	70	1	1	0	0	0	0	0	1	0	0	0	0	1	1	0	0	1	0	1	3	0	0
287	1	1	2	1.6	60	1	1	0	0	0	0	0	1	0	0	0	0	1	1	1	3	1	0	2	4	0	0
288	1	1	2	175	70	4	2	1	0	0	0	0	1	0	1	0	0	1	1	0	0	1	0	4	4	0	0
289	2	1	2	1.67	65	1	2	0	0	0	0	0	0	0	0	0	0	0	0	0	0	1	0	1	3	0	0
290	2	1	2	1.6	70	1	4	0	0	0	0	0	1	0	0	0	0	0	0	0	0	1	0	1	4	0	0
291	2	1	2	1.65	60	1	4	1	0	0	0	0	1	0	0	0	0	0	0	0	0	1	0	0	4	0	0
292	2	1	2	1.6	65	2	4	1	0	0	0	0	1	0	0	0	0	1	1	0	0	1	0	1	4	0	0
293	2	1	2	1.6	65	1	4	1	0	0	0	0	1	1	0	0	0	0	0	1	3	1	0	1	4	0	0
294	2	1	2	1.62	60	1	1	0	0	0	0	0	0	0	0	0	0	0	0	0	0	1	0	2	3	0	0
295	2	1	2	1.6	50	0	4	1	0	0	0	0	1	1	0	0	0	0	0	1	4	1	0	0	4	0	0
296	2	1	2	1.65	70	1	4	1	0	0	0	0	1	1	0	0	0	1	1	0	0	1	0	3	3	0	0
297	1	1	1	1.65	65	1	3	2	0	0	0	0	1	1	0	0	0	0	0	0	0	1	0	1	2	0	0
298	2	1	2	1.55	60	1	4	1	0	0	0	0	1	1	0	0	0	0	0	0	0	1	0	1	0	0	0
299	1	1	2	1.65	70	1	2	1	0	0	0	0	1	1	0	0	0	0	0	1	4	1	0	0	4	0	0
300	1	1	2	1.65	50	0	1	4	1	3	0	2	1	1	1	1	1	1	1	1	3	1	0	3	3	0	0
301	2	1	2	1.65	50	1	3	4	3	1	0	1	0	0	0	0	0	0	0	0	0	1	0	1	1	1	0
302	2	1	2	1.55	60	1	3	1	0	0	0	0	0	0	0	0	0	0	0	0	0	1	0	1	3	0	0
303	1	1	2	1.72	75	1	2	2	4	0	0	0	1	1	1	0	0	0	0	1	3	1	0	2	4	0	0
304	1	1	2	165	60	1	2	3	4	0	0	0	0	0	1	0	0	0	0	0	0	1	0	3	3	0	0
305	2	1	2	1.55	70	1	4	1	0	0	0	0	1	1	0	0	0	1	1	1	3	1	0	2	4	0	0
306	1	1	2	1.65	55	1	2	2	0	0	0	0	0	0	0	0	0	0	0	0	0	1	0	1	3	0	0
307	2	1	2	1.6	58	0	4	1	0	0	0	0	0	0	0	0	0	1	1	0	0	1	0	1	3	0	0
308	2	1	2	1.6	60	1	4	2	0	0	0	0	0	0	0	0	0	0	0	0	0	1	0	1	4	0	0
309	2	1	2	1.62	60	1	4	2	0	0	0	0	1	1	0	0	0	0	0	0	0	1	0	1	3	0	0
310	2	1	2	1.58	55	0	4	2	0	0	0	0	1	1	0	0	0	0	0	1	3	1	0	0	4	0	0
311	2	1	2	1.6	56	1	2	2	0	0	0	0	1	1	0	0	0	0	0	0	0	1	0	1	3	0	0
312	2	1	2	1.62	65	0	4	1	0	0	0	0	1	1	0	0	0	0	0	1	4	1	0	1	4	0	0
313	2	1	2	1.62	55	1	4	2	0	0	0	0	1	1	0	0	0	0	0	0	0	1	0	2	1	0	0
314	1	1	2	1.65	70	1	4	1	4	0	0	0	1	1	0	0	0	1	0	1	3	1	0	1	3	0	0
315	1	1	2	1.73	65	1	4	1	0	0	0	0	0	0	0	0	0	0	0	0	0	1	0	1	4	0	0
3	2	1	2	1.6	65	1	2	2	3	2	0	1	1	1	1	0	0	0	0	0	0	1	0	2	3	0	0
317	1	1	2	1.73	65	1	4	1	0	0	0	0	1	1	0	0	0	0	0	1	3	1	0	6	4	0	0
318	2	1	2	1.6	55	4	4	0	0	0	0	0	1	0	1	0	1	0	0	0	0	1	0	1	4	0	0
321	1	1	2	1.6	70	3	2	0	0	0	0	0	0	0	0	1	0	0	0	1	6	1	0	1	4	0	0
322	1	1	2	1.67	70	0	4	0	0	0	0	0	0	0	0	0	0	0	0	1	3	1	0	1	4	0	0
323	1	1	2	1.68	60	5	2	2	4	3	0	1	1	1	0	0	0	1	1	1	4	1	0	2	3	0	0
324	1	1	2	1.68	60	3	2	2	3	3	0	1	1	1	1	0	0	1	1	1	4	1	0	1	4	0	0
325	1	1	2	1.73	60	2	4	2	3	3	0	1	0	0	0	0	0	0	0	0	0	1	0	5	3	0	0
326	2	1	2	1.6	65	0	4	2	4	3	0	1	1	1	0	0	0	1	1	0	0	1	0	1	3	0	0
327	1	1	2	1.73	70	0	4	0	0	0	0	0	1	0	0	0	0	0	0	1	4	1	0	2	4	0	0
328	2	1	1	1.5	80	0	4	4	4	2	0	2	1	1	0	0	0	1	0	0	0	1	0	2	4	0	0
329	1	1	2	1.62	55	0	4	2	3	3	0	1	1	1	1	0	0	0	0	1	5	1	0	1	4	0	0
330	1	1	2	1.65	50	1	4	3	3	3	0	1	1	1	0	0	0	1	1	1	5	1	0	1	3	0	0
331	2	1	2	1.5	50	0	4	2	3	2	3	2	0	0	0	0	0	0	0	1	3	1	0	2	4	0	0
332	2	1	2	1.59	70	0	2	2	3	3	1	1	1	1	0	0	0	1	1	1	3	1	0	3	4	0	0
333	1	1	2	1.68	80	1	2	2	3	3	0	1	1	1	0	0	0	1	1	1	3	1	0	2	4	0	0
334	2	1	2	165	55	2	4	2	4	3	0	1	1	1	0	0	0	1	1	1	3	1	0	2	4	0	0
335	2	1	2	1.6	70	0	4	2	4	3	0	1	1	1	0	0	0	1	1	1	3	1	0	1	4	0	0
336	2	1	2	1.65	60	3	4	2	2	3	0	1	1	0	1	0	0	1	2	1	3	1	0	1	4	0	0
337	2	1	2	1.41	42	1	4	2	3	3	8	1	1	1	0	0	0	1	1	1	4	1	0	3	4	0	0
338	2	1	2	1.55	5	0	4	4	4	2	4	2	1	1	0	0	0	1	2	1	3	1	0	0	4	0	0
339	2	1	2	1.5	70	0	4	2	4	3	2	2	1	1	0	0	0	1	1	1	4	1	0	1	4	0	0
340	2	1	2	1.5	50	0	4	2	4	2	5	2	1	1	0	0	0	1	1	0	0	1	0	0	3	0	0
341	1	1	2	1.73	70	1	2	2	2	3	0	1	1	1	0	0	0	1	2	1	3	1	0	1	3	0	0
342	1	1	2	1.75	71	1	3	2	0	0	0	0	1	1	1	1	1	0	0	1	4	1	0	1	3	0	0
343	1	1	2	1.7	65	1	4	0	4	0	0	0	1	1	0	0	0	0	0	1	3	1	0	3	3	0	0
344	2	1	2	1.5	59.5	1	4	2	0	0	0	0	1	1	0	0	0	0	0	1	3	1	0	3	4	0	0
345	2	1	2	1.68	150	0	4	1	0	0	0	0	1	1	0	0	0	0	0	1	6	1	0	0	4	0	0
346	1	1	2	1.65	70	3	4	2	1	2	3	1	0	0	1	0	0	1	2	0	0	1	0	0	4	0	0
347	1	1	2	1.75	76	3	4	3	3	3	3	1	0	0	0	0	0	1	0	0	0	1	0	4	3	0	0
348	2	1	1	1.55	57	1	2	0	0	0	0	0	0	0	0	0	0	0	0	0	0	1	0	3	3	0	0
350	2	1	2	1.6	65	0	4	2	0	0	0	0	0	0	0	0	0	1	1	0	0	1	0	5	4	0	0
351	2	1	2	1.52	50	1	4	2	4	0	0	0	1	1	0	0	0	0	0	1	5	1	0	1	4	0	0
352	1	1	2	1.75	130	1	2	1	0	0	0	0	1	1	0	0	0	1	2	1	4	1	0	2	4	0	0
353	2	1	2	1.6	120	1	4	2	0	0	0	0	0	0	1	0	0	0	0	0	0	1	0	1	4	0	1
354	1	9999	2	1.72	70	0	4	1	0	0	0	0	0	0	1	0	0	0	0	1	6	1	0	1	4	0	0
355	1	1	2	1.7	65	2	4	2	3	3	0	1	1	1	0	0	0	1	1	1	6	1	0	1	4	0	0
356	2	1	2	1.59	55	1	4	2	1	2	0	1	0	0	1	0	0	1	1	1	3	1	0	2	4	0	0
357	2	1	2	1.72	70	1	4	0	4	0	0	0	1	1	0	0	0	0	0	0	0	1	0	2	4	0	0
358	1	1	2	1.65	60	2	4	1	0	0	0	0	0	1	0	0	0	1	1	9999	0	1	0	1	4	0	0
359	1	1	2	1.7	75	3	4	0	0	2	0	1	0	0	0	0	0	1	0	0	0	1	0	1	4	0	0
360	2	1	2	1.65	80	2	4	0	1	2	0	1	0	0	0	0	0	1	0	0	0	1	0	1	4	0	0
361	1	1	2	1.65	70	3	2	0	0	0	0	0	0	0	0	0	0	0	0	0	0	1	0	0	4	0	0
362	2	1	2	1.5	50	1	2	1	0	0	0	0	1	0	0	0	0	0	0	1	6	1	0	0	3	0	0
363	1	1	2	1.69	71	2	2	1	0	0	0	0	0	0	1	0	0	1	1	1	4	1	0	3	4	0	0
364	2	2	2	1.6	150	2	2	5	4	2	3	2	0	0	0	0	0	0	0	0	0	1	0	2	4	0	1
365	2	1	1	1.58	49	3	2	3	0	2	0	1	0	0	0	1	1	1	0	0	0	1	0	5	3	1	0
366	1	1	1	1.6	65	3	2	4	1	2	2	1	0	0	1	0	0	1	2	0	0	1	1	7	4	1	0
368	1	1	1	1.7	55	3	2	5	3	3	3	2	0	0	0	1	1	1	2	0	0	1	1	8	4	0	1
369	2	1	1	1.55	58	1	4	4	2	3	5	1	0	0	1	0	0	1	2	0	0	1	0	9	4	0	0
370	2	1	1	1.56	70	1	4	1	0	0	0	0	0	0	0	0	0	9999	0	9999	0	0	0	0	0	9999	0
371	2	1	1	1.46	78	1	2	3	1	3	2	1	0	0	1	1	1	0	0	1	6	1	0	9999	4	0	0
372	2	1	1	1.7	160	1	2	2	0	0	0	0	0	0	0	0	0	0	0	0	0	0	0	0	3	0	0
373	1	1	1	1.74	72	2	2	3	0	2	2	1	0	0	1	1	1	1	1	0	0	1	0	7	4	0	0
374	2	1	1	1.48	53.9	0	2	1	0	0	0	0	0	0	1	0	0	0	0	0	0	1	0	4	3	0	0
375	1	1	1	1.7	80	2	2	0	0	0	0		0	0	0	0	0	0	0	0	0	1	0	3	3	0	0
376	1	1	1	1.7	90	4	4	1	0	0	0	0	1	1	0	0	0	1	1	0	0	1	0	4	3	0	0
377	2	1	1	1.64	63	3	4	1	0	0	0	0	0	0	0	0	0	1	0	0	0	1	0	5	4	0	0
378	2	1	1	1.62	70	1	4	0	1	0	1	1	1	0	0	1	1	0	0	0	0	1	0	4	4	0	0
379	1	1	1	1.68	72	1	2	0	0	0	0	0	0	0	0	0	0	0	0	0	0	1	0	3	3	0	0
380	2	1	1	1.58	70	2	2	1	0	0	0	1	0	0	0	0	0	0	0	0	0	1	0	3	3	0	0
381	2	1	2	1.67	73	2	4	1	0	0	0	0	0	0	0	1	1	1	1	0	0	1	0	0	3	0	0
382	2	1	1	1.6	62	0	4	0	0	0	0	0	0	0	0	0	0	1	0	1	4	1	0	6	4	0	0
383	1	1	2	1.7	60	1	2	0	0	0	0	0	0	0	0	0	0	0	0	1	6	1	0	0	3	0	0
384	1	1	2	1.84	84	3	2	0	0	0	0	0	0	0	0	0	0	0	0	0	0	1	0	0	3	0	0
385	2	1	2	1.63	69	1	2	0	0	0	0	0	1	0	0	0	0	0	0	1	6	1	0	1	3	0	0
386	2	1	2	1.58	52	0	4	0	0	0	0	0	1	0	0	0	0	0	0	0	0	1	0	2	4	0	0
387	2	1	2	1.6	75.5	0	2	3	1	2	2	1	1	0	0	0	0	1	2	0	0	1	0	1	3	0	0
388	1	1	2	1.7	56	3	2	0	0	0	0	0	0	0	0	0	0	1	1	1	6	1	0	1	4	0	0
389	1	1	6	1.65	72	2	2	3	2	3	0	1	0	0	0	0	0	1	2	0	0	1	0	10	3	9999	0
390	2	1	6	160	70	3	2	2	4	1	0	1	1	0	0	0	0	0	0	1	6	1	0	7	4	0	0
391	2	1	6	160	80	3	2	3	0	0	0	0	1	0	1	0	0	0	0	0	0	1	0	5	3	0	0
392	2	1	6	1.63	80	2	4	1	0	0	0	0	0	0	0	1	1	1	0	0	0	1	0	3	3	0	0
393	2	1	6	1.55	72	0	4	2	4	3	7	2	1	0	0	0	0	0	0	1	6	1	0	4	4	1	0
394	2	9999	6	158	75	1	1	1	0	0	0	0	0	0	0	0	0	0	0	0	0	1	0	3	3	0	0
395	2	1	6	150	55	0	2	1	0	0	0	0	1	0	0	0	0	0	0	0	0	1	0	4	4	0	0
396	2	1	6	1.55	60	0	4	2	0	0	0	0	1	0	0	0	0	1	2	0	0	1	0	4	3	0	0
397	2	1	6	1.5	42	1	4	0	0	0	0	0	1	1	1	0	0	0	0	1	5	1	0	4	4	0	0
398	2	1	6	160	55	0	2	2	0	0	0	0	1	0	0	0	0	0	0	1	6	1	0	6	4	0	0
399	2	1	6	1.5	55	0	4	4	4	2	3	1	0	0	0	1	1	0	0	1	4	1	0	4	4	0	0
400	1	1	6	1.62	60	3	2	1	0	0	0	0	0	0	0	0	0	1	2	0	0	1	0	0	4	0	0
401	2	1	6	150	50	1	2	2	0	0	0	0	0	0	0	0	0	1	2	0	0	1	0	0	4	0	0
402	2	1	6	1.6	65	0	4	3	2	2	2	1	0	0	1	0	0	0	0	0	0	1	0	0	4	0	0
403	2	1	6	165	65	0	4	3	4	2	0	3	1	0	0	0	0	0	0	1	0	0	0	0	4	9999	0
404	2	9999	6	160	50	0	2	3	0	0	0	0	1	0	0	0	0	0	0	1	3	1	0	0	4	0	0
405	2	1	6	150	55	1	2	2	0	0	0	0	1	1	0	0	0	1	1	1	3	1	0	0	4	0	0
406	2	1	6	1.5	48	0	4	1	0	0	0	0	1	0	1	0	0	0	0	0	0	1	0	0	4	0	0
407	2	1	6	1.5	45	0	4	0	0	0	0	0	0	0	0	0	0	0	0	1	4	1	0	0	4	0	0
	2	1	6	1.65	60	2	4	3	4	1	2	2	1	0	0	1	1	0	0	1	6	1	0	0	3	0	1
409	2	1	6	1.5	70	1	4	2	0	3	0	1	1	0	0	0	0	0	0	1	5	1	0	0	4	0	0
410	2	1	6	148	47	0	4	3	0	0	0	0	1	0	0	0	0	0	0	1	4	1	0	0	4	0	0
411	1	1	6	158	50	2	2	2	0	0	0	0	1	0	0	0	0	0	0	0	0	1	0	0	4	0	0
412	1	1	6	1.65	70	2	4	2	0	0	0	0	1	0	1	0	0	0	0	1	3	1	0	0	4	0	0
413	1	1	6	1.6	60	0	2	0	0	0	0	0	0	0	0	0	0	0	0	0	0	1	0	0	3	0	0
414	2	1	6	1.65	80	0	2	3	4	2	0	1	1	1	0	0	0	0	0	0	0	1	0	0	3	0	1
415	2	9999	6	1.6	40	0	1	2	0	0	0	0	1	0	0	0	0	0	0	1	6	1	0	0	4	0	0
416	2	1	6	170	80	0	2	2	0	0	0	0	1	0	0	0	0	0	0	0	0	1	0	0	3	0	0
417	2	1	6	1.55	65	0	4	3	0	0	0	0	1	0	0	0	0	0	0	0	0	1	0	0	4	0	0
418	2	1	6	1.66	55	5	4	0	0	0	0	0	1	0	0	0	0	0	0	1	4	1	0	0	4	0	0
419	2	1	6	1.65	65	2	4	2	0	2	0	1	1	1	1	0	0	0	0	1	5	1	0	0	4	0	0
420	2	1	6	1.6	55	0	4	4	2	2	3	1	1	1	0	0	0	0	0	1	1	1	0	0	4	9999	0
421	2	1	6	1.58	80	0	4	3	0	0	0	0	1	0	0	0	0	1	0	0	0	1	0	0	3	0	0
422	1	1	6	170	70	2	2	3	0	0	0	0	1	0	0	0	0	0	0	1	3	1	0	0	4	0	0
423	2	9999	6	1.6	50	0	2	2	0	0	0	0	1	0	0	0	0	0	0	1	6	1	0	0	3	0	0
424	1	1	6	170	70	0	2	3	0	0	0	0	1	0	0	0	0	0	0	1	3	1	0	0	4	0	0
425	1	1	6	1.6	85	1	4	1	0	0	0	0	1	0	0	0	0	1	1	1	3	1	0	0	4	0	0
426	2	1	6	1.5	60	0	2	4	4	3	5	2	1	0	1	0	0	0	0	1	6	1	1	0	4	0	0
427	2	1	6	1.6	65	1	4	2	4	1	0	1	1	1	1	0	0	1	1	1	6	1	0	0	3	0	1
428	2	1	6	1.55	50	0	4	2	0	0	0	0	0	0	0	0	0	1	0	0	0	1	0	0	4	0	0
429	2	1	6	155	65	0	2	2	0	0	0	0	0	0	0	0	0	0	0	0	0	1	0	0	4	0	0
430	2	1	6	1.6	65	0	4	2	2	2	0	1	1	0	0	0	0	1	1	1	3	1	0	0	4	0	0
431	2	9999	6	1.5	50	0	4	3	0	0	0	0	0	0	1	0	0	0	0	1	6	1	0	0	2	0	0
432	1	9999	6	1.7	55	2	4	1	0	0	0	0	0	0	0	0	0	9999	0	9999	0	1	0	0	4	0	0
433	2	1	6	1.65	45	4	4	0	0	0	0	0	0	0	0	0	0	0	0	0	0	1	0	0	4	0	0
434	2	1	6	1.6	65	2	4	1	0	0	0	0	0	0	0	0	0	0	0	0	0	1	0	0	4	0	0
435	1	1	6	165	665	1	2	1	0	0	0	0	0	0	0	0	0	0	0	0	0	1	0	0	3	0	0
436	1	1	6	1.77	55	3	4	0	0	0	0	0	0	0		0	0	0	0	0	0	1	0	0	4	0	0
437	1	9999	6	1.7	60	1	2	0	0	0	0	0	1	1	0	0	0	0	0	1	3	1	0	0	4	0	0
438	1	1	6	165	80	1	2	2	0	0	0	0	0	0	0	0	0	1	0	0	0	1	0	0	4	0	0
439	2	1	6	1.54	50	0	4	1	0	0	0	0	1	0	1	0	0	1	2	1	3	1	0	0	4	0	0
440	2	1	6	1.76	80	5	2	2	0	0	0	0	0	0	1	0	0	0	0	0	0	1	0	0	4	0	0
441	1	1	6	170	50	2	2	3	0	0	0	0	1	0	0	0	0	0	0	1	3	1	0	0	4	0	0
442	2	1	6	1.5	68	4	2	3	1	2	0	1	0	0	0	0	0	1	0	0	0	1	0	0	4	0	0
443	1	1	6	1.6	66	3	2	1	0	0	0	0	1	1	0	1	0	0	0	1	5	1	0	0	4	0	0
444	1	1	6	1.65	72	3	4	2	0	0	0	0	1	0	0	0	0	0	0	0	0	1	0	0	4	0	0
445	1	1	6	174	70	2	2	3	0	0	0	0	1	0	0	0	0	0	0	1	3	1	0	0	4	0	0
446	2	1	6	1.55	55	0	2	2	0	0	0	0	1	0	0	0	0	1	1	1	3	1	0	0	3	0	0
447	1	1	6	175	65	3	4	0	0	0	0	0	0	0	0	0	0	0	0	0	0	1	0	0	4	0	0
448	2	9999	6	1.6	72	0	4	1	0	0	0	0	0	0	0	0	0	1	0	0	0	1	0	0	3	0	0
449	2	1	6	1.56	75	2	2	3	0	3	8	1	1	0	0	0	0	1	0	0	0	1	0	0	3	0	0
450	2	1	6	1.6	80	0	4	2	1	1	3	1	1	0	1	0	0	0	0	1	3	1	0	0	4	0	0
451	2	9999	6	1.59	52	3	4	0	0	0	0	0	0	0	0	0	0	0	0	0	0	1	0	0	4	0	0
452	2	1	6	1.6	55	0	4	2	0	0	0	0	1	0	0	1	1	1	2	0	0	1	0	0	4	0	0
453	1	1	6	1.68	60	9999	9999	3	1	2	0	1	0	0	0	0	0	0	0	0	0	1	0	0	4	0	0
454	9999	9999	9999	1.6	70	9999	9999	3	1	2	0	1	1	0	0	0	0	0	0	1	5	1	0	0	3	9999	0
455	2	1	1	160	116	0	4	3	4	0	0	0	0	0	0	0	0	9999	0	9999	0	0	0	0	0	9999	0
456	9999	9999	9999	1.67	67	9999	9999	1	0	0	0	0	0	0	0	0	0	9999	0	9999	0	0	0	0	0	9999	0
457	2	1	1	1.6	60	2	2	2	0	0	0	0	1	0	0	0	0	9999	0	9999	0	0	0	0	0	0	0
458	1	9999	9999	1.71	80	9999	9999	3	0	0	0	0	0	0	0	0	0	9999	0	9999	0	0	0	0	0	0	0
459	9999	9999	9999	1.5	49	9999	9999	1	0	0	0	0	0	0	0	0	0	9999	0	9999	0	0	0	0	0	0	0
460	9999	9999	9999	1.57	51	9999	9999	2	0	0	0	0	0	0	0	0	0	9999	0	9999	0	0	0	0	0	0	0
461	9999	9999	9999	1.62		9999	9999	2	4	1	0	0	0	0	0	0	0	9999	0	9999	0	0	0	0	0	9999	0
462	9999	9999	9999	1.74	85	9999	9999	0	4	0	0	0	0	0	0	0	0	9999	0	9999	0	0	0	0	0	0	0
463	9999	9999	9999	1.72	60	9999	9999	1	0	0	0	0	0	0	0	0	0	9999	0	9999	0	0	0	0	0	0	0
464	9999	9999	9999	1.65	50	9999	9999	2	2	0	0	0	0	0	0	0	0	9999	0	9999	0	0	0	0	0	9999	0
465	9999	9999	9999	1.74		9999	9999	3	4	0	0	0	0	0	0	0	0	9999	0	9999	0	0	0	0	0	9999	0
466	9999	9999	9999	1.55		9999	9999	3	4	0	0	0	0	0	0	0	0	9999	0	9999	0	0	0	0	0	9999	0
467	9999	9999	9999	1.75	70	9999	9999	3	4	0	0	0	0	0	0	0	0	9999	0	9999	0	0	0	0	0	9999	0
468	9999	9999	9999	1.75	80	9999	9999	0	0	0	0	0	0	0	0	0	0	9999	0	9999	0	0	0	0	0	0	0
469	9999	9999	9999	1.75	62	9999	9999	1	0	0	0	0	0	0	0	0	0	9999	0	9999	0	0	0	0	0	0	0
470	9999	9999	9999	1.7	70	9999	9999	1	0	0	0	0	0	0	0	0	0	9999	0	9999	0	0	0	0	0	0	0
471	9999	9999	9999	1.8	90	9999	9999	2	4	0	0	0	0	0	0	0	0	9999	0	9999	0	0	0	0	0	9999	0
472	9999	9999	9999	1.75		9999	9999	2	4	0	0	0	0	0	0	0	0	9999	0	9999	0	0	0	0	0	9999	0
473	9999	9999	9999	1.73	57	9999	9999	0	0	0	0	0	0	0	0	0	0	9999	0	9999	0	0	0	0	0	0	0
474	1	1	2	1.7	75	2	2	1	0	0	0	0	0	0	0	1	1	0	0	0	0	1	0	4	4	0	0
475	9999	9999	9999	165		9999	9999	3	4	0	0	0	0	0	0	0	0	9999	0	9999	0	0	0	0	0	9999	0
476	9999	9999	9999	1.65	70	9999	9999	1	0	0	0	0	0	0	0	0	0	9999	0	9999	0	0	0	0	0	0	0
478	9999	9999	9999	1.73	70	9999	9999	0	0	0	0	0	0	0	0	0	0	9999	0	9999	0	1	0	0	0	0	0
479	9999	9999	9999	1.66	90	9999	9999	1	0	0	0	0	0	0	0	0	0	9999	0	9999	0	0	0	0	0	0	0
480	9999	9999	9999	1.53	41	9999	9999	0	0	0	0	0	0	0	0	0	0	9999	0	9999	0	0	0	0	0	0	0
481	2	1	1	1.5	46	0	4	3	1	3	2	1	1	1	1	1	1	1	1	1	6	0	0	2	4	0	0
482	2	1	1	1.6	55	4	4	2	4	0	0	0	0	0	0	0	0	0	0	0	0	0	0	0	4	0	0
483	2	9999	6	1.6	60	0	2	2	0	0	0	0	1	1	0	0	0	0	0	1	6	0	0	0	4	0	0
484	1	9999	6	1.7	65	1	1	3	2	3	0	2	1	0	0	0	0	1	2	1	3	0	0	6	4	0	1
485	1	1	1	1.72	75	3	2	1	0	0	0	0	1	0		0	0	0	0	0	0	0	0	0	3	0	0
486	1	9999	6	1.72	70	1	2	1	0	0	0	0	0	0	1	0	0	0	0	0	0	0	0	0	3	0	0
487	2	1	1	1.53	41	0	2	3	1	2	1	1	0	0	0	0	0	0	0	1	6	0	0	1	2	0	1
488	2	1	1	1.45	54	1	2	1	0	0	0	0	1	1	0	0	0	9999	0	0	0	0	0	3	3	0	0
489	2	1	1	1.7	90	0	2	1	0	0	0	0	1	1	0	0	0	0	0	0	0	0	0	1	4	0	0
490	1	1	1	1.65	70	0	4	0	0	0	0	0	0	0	0	0	0	9999	0	9999	0	0	0	0	3	0	0
491	2	1	2	1.64	60	2	3	1	0	0	0	0	0	0	0	0	0	1	1	0	0	1	0	0	3	0	0
492	1	1	6	1.75	100	2	4	1	0	0	0	0	1	1	1	0	0	1	1	1	3	1	0	7	4	0	0
493	1	1	1	1.75	90	3	2	5	3	3	3	0	1	0	0	0	0	1	1	1	4	1	0	3	4	0	0
494	2	1	6	1.57	65	2	2	1	0	0	0	0	0	0	1	1	1	0	0	0	0	1	0	1	3	0	0
495	1	1	6	1.72	75	1	2	1	0	0	0	0	0	0	0	0	0	0	0	0	0	1	0	1	2	0	0
496	1	1	1	1.68	61.5	4	4	2	1	3	5	1	1	1	0	0	0	1	1	1	3	1	0	2	4	1	0
497	2	1	6	1.55	56	0	2	0	0	0	0	0	1	1	0	0	0	0	0	0	0	1	0	1	3	0	1
498	1	1	1	1.65	70	1	2	4	3	3	0	1	1	1	0	0	0	1	2	1	3	1	0	3	4	0	1
499	2	1	3	1.55	80	0	2	1	0	0	0	0	1	1	0	0	0	0	0	0	0	1	0	1	3	0	1
500	1	1	1	1.65	65	5	4	3	4	0	0	0	1	1	1	0	0	0	0	0	0	1	0	4	4	0	1
501	1	1	1	1.7	90	3	4	4	1	3	0	1	0	0	1	1	1	0	0	0	0	1	0	2	4	0	1
502	2	1	1	1.6	68	1	4	2	0	0	0	0	1	0	0	0	0	1	0	0	0	1	0	2	3	0	1
503	1	1	1	1.8	90	1	4	2	0	2	0	1	1	1	0	0	0	0	0	0	0	1	0	1	3	1	1
505	2	1	1	1.45	44	1	2	0	0	0	0	0	0	0	0	0	0	1	1	0	0	1	0	1	4	0	1
506	2	1	1	1.5	64	0	2	0	0	0	0	0	0	0	0	0	0	1	1	1	3	1	0	2	4	0	1
507	2	1	1	1.5	70	0	2	0	0	0	0	0	0	0	0	0	0	1	1	0	0	1	0	1	4	0	1
508	2	1	1	1.4	59	0	2	2	2	3	3	1	0	0	0	1	0	1	1	0	0	1	0	1	4	0	1
509	2	1	1	1.48	71	2	2	1	0	0	0	0	0	0	0	0	0	1	1	0	0	1	0	1	3	0	1
510	2	1	1	1.53	41	0	2	1	0	0	0	0	0	0	0	1	1	1	1	0	0	1	0	1	3	0	1
511	2	1	3	1.55	46	0	2	1	0	0	0	0	0	0	0	1	1	1	1	0	0	1	0	1	3	0	1
512	2	1	1	1.6	61	0	2	1	0	0	0	0	0	0	0	0	0	1	1	0	0	1	0	1	4	0	1
513	1	1	6	1.76	60	0	2	4	1	3	4	1	0	0	1	1	1	0	0	0	0	1	0	1	3	0	1
514	2	1	1	1.65	85	3	2	0	0	0	0	0	0	0	0	1	0	1	1	0	0	1	0	1	3	0	1
515	2	1	6	1.58	40	0	2	1	0	0	0	0	0	0	0	1	1	1	1	0	0	1	0	2	3	0	1
516	1	1	1	1.68	65	1	2	0	0	0	0	0	0	0	0	0	0	1	1	0	0	1	0	2	3	0	1
517	1	1	6	1.58	55	2	4	4	3	3	0	1	1	1	0	0	0	0	0	1	4	1	0	2	4	0	1
518	1	1	4	1.55	70	3	2	1	0	0	0	0	0	0	0	1	0	1	1	0	0	1	0	2	4	0	1
519	2	1	3	1.59	72.5	1	2	1	0	0	0	0	0	0	0	1	0	1	1	0	0	1	0	1	3	0	1
520	2	1	2	1.58	60	1	4	3	0	3	5	1	0	0	1	0	0	0	0	0	0	1	0	6	3	0	1
521	2	1	6	1.56	56	1	2	2	0	1	3	1	0	0	0	1	0	1	1	0	0	1	0	1	3	0	1
522	2	1	2	1.58	60	0	2	0	0	0	0	0	0	0	0	0	0	1	1	0	0	1	0	6	3	0	1
523	2	1	6	1.5	61	1	4	1	0	0	0	0	0	0	0	1	0	1	0	0	0	1	0	4	4	0	1
524	2	1	6	1.58	50	1	4	4	3	3	0	1	1	0	0	0	0	0	0	0	0	1	0	1	4	0	0
525	2	1	6	1.6	65	2	2	0	0	0	0	0	0	0	0	0	0	0	0	0	0	1	0	1	3	0	0
526	1	1	6	1.68	70	2	2	0	0	0	0	0	0	0	0	0	0	0	0	0	0	1	0	1	3	0	0
527	2	1	2	1.62	65	1	4	2	4	2	0	1	1	1	0	0	0	1	1	1	6	1	0	1	4	0	0
528	2	1	2	1.6	55	0	4	2	1	2	0	1	1	1	0	0	0	0	0	0	0	1	0	1	4	0	0
529	2	1	2	1.64	66	0	4	1	0	0	0		1	1	1	0	0	0	0	0	0	1	0	2	4	0	0
530	2	1	2	1.67	60	0	2	0	0	0	0	0	1	1	0	0	0	0	0	1	3	1	0	1	4	0	0
531	1	1	2	1.69	75	1	2	1	0	0	0	0	0	0	0	1	1	1	1	0	0	1	0	1	4	0	0
532	2	1	2	1.59	41	0	4	0	0	0	0	0	1	0	1	0	0	1	0	1	4	1	0	2	4	0	0
533	2	1	2	1.6	60	1	2	0	0	0	0	0	0	0	0	0	0	1	1	0	0	1	0	1	3	0	0
534	1	1	2	1.75	92.5	3	2	0	0	0	0	0	0	0	0	0	0	1	1	0	0	1	0	1	3	0	0
535	1	1	1	1.6	70	1	2	1	0	0	0	0	1	0	0	0	0	0	0	0	0	1	0	2	3	0	0
536	1	1	6	1.65	45	1	4	2	1	2	0	1	0	0	1	0	0	0	0	0	0	1	0	1	4	0	0
537	2	1	6	1.63	85	2	2	1	0	0	0	0	0	0	0	1	1	0	0	0	0	1	0	2	2	0	0
538	2	1	1	1.47	45	4	4	1	0	0	0	0	0	0	0	0	0	1	1	1	3	1	0	0	4	0	0
539	2	1	6	1.62	75	1	2	3	2	3	0	1	1	1	0	0	0	0	0	1	3	1	0	3	3	0	0
540	2	1	6	1.5	40	1	2	3	1	2	0	1	0	0	0	1	1	0	0	0	0	1	0	2	3	0	0
542	1	1	6	1.69	65	1	2	0	0	0	0	0	0	0	0	0	0	0	0	0	0	1	0	0	2	0	0
543	2	1	6	1.58	55	0	2	2	0	1	0	1	0	0	0	1	1	0	0	0	0	1	0	1	2	0	0
544	2	1	6	1.6	50	2	2	4	2	3	2	1	0	0	1	1	1	0	0	0	0	1	0	7	3	0	0
545	1	1	6	1.78	70	2	2	0	0	0	0	0	0	0	0	0	0	0	0	0	0	1	0	1	3	0	0
546	2	1	6	1.6	65	1	2	2	1	2	0	1	0	0	1	0	0	0	0	0	0	1	0	0	4	0	0
547	2	1	6	1.6	55	1	4	3	1	3	0	1	0	0	1	1	1	0	0	1	4	1	0	1	4	0	0
548	2	1	1	1.6	70	0	4	4	0	0	0	0	1	1	0	0	0	1	1	0	0	1	0	2	4	0	1
549	2	1	1	1.8	65	3	2	1	0	0	0	0	0	0	0	1	1	1	0	0	0	1	0	0	4	0	0
550	2	1	1	1.55	56	3	2	3	0	0	0	0	0	0	0	0	0	0	0	0	0	1	0	0	4	0	0
552	2	1	2	1.63	52	3	4	0	0	0	0	0	1	1	0	1	1	0	0	1	3	1	0	2	4	0	0
554	2	1	4	1.5	60	3	4	2	0	0	0	0	0	0	1	0	0	0	0	0	0	1	1	0	3	0	1

## Sheet: 2
SEQN	性别	民族	区县	身高	体重	学历	婚姻	FRAIL	FRAIL程度	ADL	VAS	社会参与功能	EQ-5D	认知障碍初筛	MMSE	SPPB	营养不良初筛	MNA.SF	视力初筛	视力评估	听力初筛	听力得分	听力障碍	抑郁初筛	SAS	共病指数	年龄指数	社会支持初筛	受虐待风险	照护者支持不足
3	2	1	2	1.6	65	1	2	2	0	3	0	2	1	1	1	1	0	0	0	0	0	0	0	1	0	2	3	0	0	0
15	1	1	3	1.8	75	2	4	4	1	2	0	1	1	1	0	0	0	0	0	0	0	0	0	1	0	4	4	0	0	1
16	1	1	3	1.8	75	2	4	2	0	0	0	0	0	0	0	0	0	0	0	0	0	0	0	1	0	3	4	0	0	1
17	2	1	3	1.64	60	2	4	3	1	4	0	2	1	1	1	0	0	0	0	0	0	0	0	1	2	1	3	0	0	1
18	2	1	3	1.55	56	0	4	1	0	0	0	0	0	1	1	0	0	0	0	0	0	0	0	1	0	0	4	0	0	1
19	2	1	3	1.6	60	0	4	2	0	4	0	2	1	1	1	0	0	0	0	0	0	0	0	1	0	1	4	0	0	1
20	1	1	3	1.7	61	2	2	3	1	2	0	1	1	1	1	0	1	1	0	0	0	0	0	1	0	1	4	0	0	1
21	2	1	3	1.58	65	0	2	3	1	2	6	1	1	1	1	0	0	0	0	0	1	3	2	1	0	1	4	0	0	1
22	1	1	3	1.7	55	0	4	1	0	0	0	0	0	1	0	1	0	0	0	0	1	3	2	1	0	2	4	0	0	1
23	2	1	3	1.58	62	0	4	2	0	2	5	3	1	1	1	0	0	0	0	0	0	0	0	1	0	1	3	0	0	1
26	1	1	6	1.6	70	0	1	1	0	4	0	0	0	1	1	0	0	0	0	0	1	6	0	1	0	2	3	0	0	1
27	1	1	6	1.65	60	0	1	0	0	4	0	0	0	0	0	0	0	0	0	0	0	0	0	1	0	3	3	0	0	1
28	1	1	6	1.75	65	1	1	0	0	4	0	0	0	1	1	0	0	0	0	0	0	0	0	1	0	3	3	0	0	1
29	1	1	6	1.6	80	0	1	1	0	4	0	0	0	0	0	0	0	0	9999	0	0	0	0	1	0	4	4	0	0	1
30	1	1	6	1.5	60	0	1	1	0	4	0	0	0	1	1	0	0	0	1	0	1	3	2	1	0	3	3	0	0	1
31	1	9999	6	1.65	70	1	1	2	0	0	0	0	0	1	1	1	0	0	1	0	1	6	0	1	0	5	4	0	0	1
32	1	1	6	1.71	73	2	1	0	0	0	0	0	0	1	0	0	0	0	1	1	1	3	2	1	0	4	3	0	0	1
33	1	1	6	1.7	80	0	1	2	0	0	0	0	0	1	1	0	1	1	0	0	1	3	2	1	0	10	3	0	0	1
34	1	1	6	1.6	57.5	0	1	2	0	0	2	0	1	0	0	0	0	0	1	0	0	0	0	1	0	3	3	0	0	1
35	1	1	6	1.65	60	0	1	3	1	0	0	0	0	1	0	1	0	0	0	0	1	4	1	1	0	5	3	0	0	1
36	1	1	6	1.6	65	0	1	2	0	1	0	2	1	1	0	0	1	1	1	2	1	6	0	1	0	4	3	0	0	1
37	2	1	1	1.49	61	3	2	0	0	0	0	0	0	1	0	0	0	0	0	0	0	0	0	1	0	6	4	0	0	1
38	2	1	1	1.56	73	4	2	0	0	0	0	0	0	1	1	0	0	0	9999	0	9999	0	0	1	0	4	3	0	0	1
39	1	1	1	1.8	95	2	2	2	0	0	0	0	1	0	0	0	0	0	1	1	0	0	0	1	0	0	3	9999	0	1
40	1	1	1	1.73	62	3	2	1	0	0	0	0	1	0	0	0	0	0	1	2	1	3	2	1	0	3	3	0	0	1
41	2	1	1	1.6	55	0	4	2	0	0	2	2	1	0	0	0	0	0	1	2	1	4	1	1	0	7	3	0	0	1
42	2	1	1	1.58	51	3	2	0	0	0	0	0	0	1	0	1	0	0	1	2	1	4	1	1	0	5	4	0	0	1
43	1	1	1	1.72	51	5	2	0	0	0	0	0	0	0	0	0	1	1	1	0	1	6	0	1	0	5	4	0	0	1
44	2	1	1	1.58	70	1	2	1	0	0	0	0	0	1	1	1	0	0	1	2	9999	0	0	1	0	6	3	0	0	1
45	1	1	1	1.63	80	2	2	0	0	0	0	0	0	0	0	0	0	0	1	1	1	4	1	1	0	4	3	0	0	1
46	2	1	1	1.47	60	1	4	2	0	0	2	0	1	1	0	0	0	0	1	1	1	3	2	1	0	6	4	0	0	1
47	2	1	1	1.66	75	0	2	1	0	0	0	0	0	0	0	0	0	0	0	0	0	0	0	0	0	0	3	0	0	1
48	1	1	1	1.66	135	5	4	3	1	1	8	0	1	0	0	0	0	0	1	2	0	0	0	1	0	7	4	0	0	1
49	1	1	1	1.6	65	4	2	0	0	0	0	0	0	0	0	0	0	0	0	0	9999	0	0	1	0	7	4	0	0	1
50	2	1	1	1.65	75	1	4	2	0	0	0	0	1	0	0	1	0	0	0	0	0	0	0	1	0	1	3	1	1	1
51	2	1	1	1.55	67	3	2	1	0	0	0	0	0	1	0	0	0	0	1	1	1	5	2	1	1	4	4	0	0	1
52	1	1	1	1.7	65	5	2	0	0	0	0	0	0	1	0	0	0	0	0	0	1	3	2	1	1	4	4	0	0	1
55	1	1	1	1.69	64.9	2	2	1	0	0	0	0	0	0	0	0	1	0	1	0	0	0	0	1	0	1	3	0	0	1
57	2	1	1	1.57	70.3	2	4	2	0	0	1	0	1	0	0	0	0	0	0	0	0	0	0	1	0	1	3	0	0	1
58	1	1	1	1.73	61.3	2	2	0	0	0	0	0	0	0	0	0	0	0	0	0	0	0	0	1	0	0	4	0	0	1
59	1	1	1	1.5	62.2	1	4	3	1	0	0	0	0	1	1	1	0	0	0	0	1	3	2	1	0	0	3	0	0	1
60	2	1	1	1.59	67	2	2	1	0	0	0	0	0	0	0	0	0	0	0	0	0	0	0	1	0	0	3	0	0	1
61	1	1	1	1.7	71	1	2	0	0	0	0	0	0	0	0	0	0	0	0	0	0	0	0	1	0	0	3	0	0	1
62	1	1	6	1.65	75	0	1	3	1	0	0	0	0	0	0	0	0	0	0	0	0	0	0	1	0	3	3	0	0	1
63	1	1	1	1.65	65	0	2	0	0	0	0	0	0	0	0	1	0	0	0	0	0	0	0	1	0	0	3	0	0	1
64	1	1	6	1.7	73	0	1	3	1	4	3	0	1	0	0	0	1	1	0	0	0	0	0	1	0	3	3	0	0	1
66	1	1	1	1.66	70	3	4	1	0	0	0	0	0	0	0	0	0	0	0	0	0	0	0	1	0	0	4	0	0	1
67	2	1	1	1.6	56	0	4	2	0	0	0	0	0	1	1	0	0	0	0	0	1	6	0	1	0	1	4	0	0	1
68	1	1	3	1.67	60	2	2	0	0	0	0	0	0	0	0	1	1	1	0	0	0	0	0	1	0	0	3	0	0	1
69	1	1	1	1.7	70	2	2	2	0	1	0	3	1	0	0	1	0	0	0	0	0	0	0	1	0	1	4	0	0	1
70	2	1	1	1.68	60	3	4	0	0	0	0	0	1	0	0	0	0	0	0	0	0	0	0	1	0	0	4	1	0	1
71	2	1	1	1.5	65	2	2	1	0	0	0	0	0	0	0	1	0	0	1	1	0	0	0	1	0	0	3	0	0	1
72	2	1	1	1.55	60	0	4	0	0	0	0	0	0	0	0	0	0	0	0	0	0	0	0	1	0	0	4	0	0	1
73	2	1	2	1.6	60	0	4	1	0	0	0	0	0	0	0	0	1	1	0	0	1	5	2	1	0	0	4	0	0	0
75	1	9999	1	1.68	67	3	2	0	0	0	0	0	0	0	0	0	0	0	0	0	0	0	0	1	0	0	4	0	0	0
76	2	1	1	1.52	64	1	2	0	0	0	0	0	0	0	0	0	0	0	0	0	0	0	0	1	0	0	3	0	0	0
77	1	1	1	1.47	60	1	2	0	0	0	0	0	0	0	0	0	0	0	0	0	0	0	0	1	0	0	3	0	0	0
78	1	1	1	1.76	60	3	2	0	0	0	0	0	0	0	0	0	1	0	0	0	0	0	0	1	0	0	4	0	0	0
79	1	1	1	1.62	74.3	1	2	0	0	0	0	0	0	0	0	0	0	0	0	0	0	0	0	1	0	1	3	0	0	1
80	2	1	1	1.55	120	2	4	0	0	0	0	0	0	0	0	1	1	1	0	0	0	0	0	1	0	0	4	0	0	0
81	2	1	1	1.55	70.8	1	2	0	0	0	0	0	0	0	0	0	0	0	0	0	0	0	0	1	0	0	4	0	0	1
82	2	1	1	1.6	50	0	2	2	0	0	0	0	0	1	0	0	0	0	1	0	0	0	0	1	0	2	4	0	0	0
83	1	1	1	1.6	65	3	2	0	0	0	0	0	0	0	0	0	0	0	0	0	0	0	0	1	0	1	4	0	0	0
84	2	1	1	1.53	57.3	0	4	0	0	0	0	0	0	0	0	0	0	0	0	0	0	0	0	1	0	1	4	0	0	1
85	1	1	3	1.75	80	2	4	0	0		0	0	0	0	0	1	0	0	1	0	1	5	2	1	0	1	4	0	0	0
88	2	1	3	1.6	50	0	4	2	0	1	1	2	1	1	1	1	1	1	1	2	1	4	1	1	0	1	3	0	0	1
89	2	1	1	1.57	65	1	2	2	0	0	5	0	1	1	1	0	0	0	1	1	0	0	0	1	0	4	3	0	0	0
90	1	1	1	1.65	63	1	2	4	1	1	2	0	1	1	0	0	0	0	1	1	0	0	0	1	0	5	4	0	0	0
91	2	1	1	1.6	58	4	4	3	1	0	0	0	0	1	1	0	1	1	1	1	1	3	2	1	0	4	4	0	0	0
92	1	1	1	1.7	82	3	3	0	0	0	0	0	0	0	0	0	0	0	0	0	0	0	0	1	0	2	3	0	0	0
93	2	2	1	1.56	57	2	4	0	0	0	0	0	0	0	0	0	1	1	0	0	0	0	0	1	0	0	4	0	0	0
94	1	1	1	1.56	115	2	2	3	1	1	3	0	1	0	0	1	1	1	1	1	1	4	1	1	0	0	4	0	0	1
95	1	1	1	1.67	90	2	2	0	0	0	0	0	0	0	0	1	0	0	0	0	0	0	0	1	0	0	3	0	0	1
96	2	1	1	1.42	39.5	1	2	0	0	0	0	0	0	0	0	1	0	0	0	0	0	0	0	1	0	0	3	0	0	0
97	1	1	1	1.65	96.2	3	2	1	0	0	0	0	0	0	0	0	0	0	0	0	0	0	0	1	0	0	3	0	0	1
98	2	1	1	1.52	62.3	2	2	3	1	4	3	3	2	1	0	1	0	0	0	0	1	6	0	1	0	2	3	0	0	1
99	2	1	1	1.6	50	3	2	0	0	0	0	0	0	0	0	0	0	0	1	1	0	0	0	1	0	0	0	0	0	0
101	1	1	1	1.7	80	2	2	1	0	0	0	0	0	1	0	0	0	0	0	0	0	0	0	1	0	0	3	0	0	0
102	1	1	1	1.68	70	2	2	5	1	0	5	3	2	1	1	0	1	1	0	0	0	0	0	1	0	1	4	0	0	1
103	2	1	1	1.55	75	1	2	0	0	0	0	0	0	0	0	0	0	0	0	0	0	0	0	1	0	0	3	0	0	0
104	2	1	3	1.52	44	1	2	1	0	0	0	0	1	0	0	0	0	0	0	0	1	3	2	1	0	1	3	0	0	0
105	2	1	1	1.62	75	1	2	4	1	2	0	0	1	0	0	1	1	1	0	0	0	0	0	1	0	0	3	0	0	0
106	1	1	3	1.63	60	1	4	3	1	1	0	0	1	1	0	0	1	1	0	0	1	6	0	1	0	2	3	0	0	1
107	1	1	3	1.72	70	1	4	2	0	0	0	0	0	1	1	0	1	1	0	0	1	6	0	1	0	0	4	0	0	1
108	1	1	3	1.6	60	0	4	1	0	0	0	0	0	1	0	1	0	0	0	0	1	4	1	1	0	2	3	0	0	1
109	1	1	3	1.7	70	1	4	0	0	0	0	0	0	1	0	1	0	0	0	0	1	4	1	1	0	0	4	0	0	0
110	1	1	1	1.7	65	5	2	0	0	0	0	0	0	0	0	0	0	0	0	0	0	0	0	1	0	0	4	0	0	0
111	1	1	1	1.6	60	2	2	1	0	0	0	0	0	0	0	0	1	1	0	0	0	0	0	1	0	2	4	0	0	0
112	2	1	1	1.53	60	2	2	1	0	0	0	0	0	0	0	0	0	0	0	0	0	0	0	1	0	0	3	0	0	0
113	2	1	3	1.58	60	0	4	2	0	4	2	3	1	1	1	0	0	0	0	0	1	4	1	1	0	1	4	0	0	1
114	1	1	3	1.6	65	0	4	3	1	4	0	3	1	1	1	0	0	0	0	0	1	4	1	1	0	4	4	1	0	1
115	2	1	1	1.55	54	0	4	1	0	0	0	0	0	0	0	0	0	0	0	0	0	0	0	1	0	1	4	0	0	0
116	2	1	3	1.6	65	0	3	2	0	4	0	3	1	1	0	0	0	0	0	0	1	6	0	1	0	0	3	0	0	0
117	2	1	3	1.55	50	0	4	2	0	0	0	0	0	1	0	0	0	0	0	0	1	4	1	1	0	5	4	0	0	1
118	1	1	3	1.68	70	0	2	0	0	0	0	0	0	1	0	0	0	0	0	0	1	3	2	1	0	0	4	0	0	0
119	2	1	3	1.48	40	0	4	2	0	0	0	0	0	1	1	0	0	0	0	0	1	3	2	1	0	5	3	0	0	1
120	1	1	3	1.7	63	3	4	0	0	0	0	0	0	0	0	0	0	0	0	0	1	4	1	1	0	0	4	0	0	0
121	2	1	3	1.55	60	1	4	0	0	0	0	0	0	0	0	0	0	0	0	0	0	0	0	1	0	2	4	0	0	1
122	2	1	3	1.55	60	0	3	2	0	4	0	3	1	0	1	0	0	0	0	0	1	4	1	1	0	0	4	1	1	0
123	2	1	1	1.5	55	3	2	4	1	1	2	0	1	0	0	1	0	0	1	2	1	6	0	1	0	3	4	0	0	0
124	1	1	3	1.65	65	3	4	2	0	0	0	0	0	1	0	0	0	0	0	0	1	3	2	1	0	0	4	0	0	0
125	1	1	3	1.77	70	0	4	2	0	0	0	0	0	1	1	0	0	0	0	0	0	0	0	1	0	2	3	0	0	1
126	2	1	3	1.55	60	0	4	2	0	2	0	1	1	1	1	1	0	0	0	0	1	4	1	1	0	0	4	1	1	0
127	2	1	3	1.55	50	0	4	2	0	4	0	3	2	1	0	0	0	0	1	2	1	3	2	1	0	3	4	0	0	1
128	1	1	3	1.58	55	3	4	2	0	4	2	3	1	1	1	0	0	0	0	0	1	4	1	1	0	0	4	1	0	0
129	2	1	1	1.52	50	0	4	0	0	0	0	0	0	0	0	0	1	0	0	0	0	0	0	1	0	0	4	0	0	0
130	2	1	1	1.65	68	3	2	0	0	0	0	0	0	0	0	0	0	0	0	0	0	0	0	1	0	0	4	0	0	0
131	1	1	1	1.65	58	2	2	1	0	0	0	0	0	0	0	0	9999	0	0	0	0	0	0	1	0	0	3	0	0	0
132	2	1	1	1.56	43	2	2	3	1	0	0	0	0	0	0	0	0	0	1	2	0	0	0	1	0	0	3	0	0	0
133	1	1	1	1.74	50	2	2	2	0	0	0	0	0	1	1	0	1	1	0	0	1	3	2	1	0	2	4	0	0	1
134	1	1	2	1.63	66	1	2	0	0	0	0	0	0	0	0	0	0	0	1	0	1	3	2	1	0	0	4	0	0	0
135	2	1	2	1.5	67	1	2	0	0	0	0	0	0	0	0	0	0	0	1	0	0	0	0	1	0	0	4	0	0	0
136	1	1	1	1.76	60	4	2	0	0	0	0	0	0	0	0	0	0	0	0	0	1	3	2	1	0	1	4	0	0	0
137	2	1	1	1.56	72	1	4	2	0	1	2	0	1	0	0	1	1	1	1	1	1	4	1	1	0	0	4	0	0	0
138	1	1	1	1.7	80	1	4	0	0	0	0	0	0	0	0	0	0	0	0	0	0	0	0	1	0	0	4	0	0	0
140	2	1	1	1.75	55	2	4	5	1	4	2	3	1	0	0	0	1	1	1	1	0	0	0	1	0	2	4	0	0	0
141	1	1	1	1.7	60	1	4	0	0	0	0	0	0	0	0	0	0	0	0	0	0	0	0	1	0	0	4	0	0	0
142	1	1	1	1.68	70	1	2	0	0	0	0	0	0	0	0	0	0	0	0	0	0	0	0	1	0	0	4	0	0	0
143	2	1	1	1.53	60	0	2	1	0	0	0	0	0	0	0	0	0	0	0	0	0	0	0	1	0	0	4	0	0	0
144	2	1	1	1.63	77	3	2	0	0	0	0	0	0	0	0	0	0	0	0	0	0	0	0	1	0	1	3	0	0	0
145	2	1	1	1.52	65	0	2	0	0	0	0	0	0	0	0	0	0	0	0	0	0	0	0	1	0	0	4	0	0	0
146	2	9999	9999	1.5	125	1	4	3	1	0	0	0	0	0	0	0	0	0	9999	0	9999	0	0	0	0	0	4	0	0	0
147	2	1	1	1.53	65	0	2	0	0	0	0	0	0	0	0	0	0	0	0	0	0	0	0	1	0	0	4	0	0	0
148	2	1	1	1.53	65	1	2	4	1	2	2	2	1	0	0	0	0	0	1	1	1	4	1	1	0	0	4	0	0	0
149	2	1	1	1.52	65	0	4	2	0	1	0	0	1	0	0	0	0	0	0	0	0	0	0	1	0	1	4	0	0	0
150	2	1	1	1.5	64	1	2	0	0	0	0	0	0	0	0	0	0	0	0	0	0	0	0	1	0	0	4	0	0	0
151	2	1	1	1.54	62	0	4	0	0	0	0	0	0	0	0	0	1	0	0	0	0	0	0	1	0	0	4	0	0	0
152	1	1	1	1.58	55	0	4	1	0	0	0	0	0	0	0	0	0	0	0	0	0	0	0	1	0	0	4	0	0	0
153	1	1	1	1.73	83	1	2	0	0	0	0	0	0	0	0	0	0	0	0	0	1	3	2	1	0	0	4	0	0	0
154	1	1	1	1.6	55	0	4	1	0	0	0	0	0	0	0	0	0	0	0	0	0	0	0	1	0	0	3	0	0	0
155	2	1	1	1.67	76	1	2	0	0	0	0	0	0	0	0	0	0	0	0	0	0	0	0	1	0	0	3	0	0	0
156	1	1	1	1.72	70	0	3	0	0	0	0	0	0	0	0	0	0	0	0	0	0	0	0	1	0	0	3	0	0	0
157	2	1	1	1.62	75	0	2	1	0	0	0	0	0	0	0	0	0	0	0	0	0	0	0	1	0	0	4	0	0	0
158	2	1	1	1.5	72	0	4	3	1	1	4	0	1	0	0	0	0	0	0	0	0	0	0	1	0	7	4	9999	0	0
159	2	1	1	1.53	56	0	2	2	0	1	0	2	1	0	1	1	0	0	0	0	0	0	0	1	0	0	0	0	0	0
160	2	1	1	1.53	57	0	4	0	0	0	0	0	0	0	0	0	0	0	0	0	0	0	0	1	0	1	3	0	0	0
161	2	1	1	1.5	79	0	2	1	0	0	0	0	0	0	0	0	0	0	9999	0	0	0	0	1	0	0	3	0	0	0
162	2	1	1	1.5	79	0	2	1	0	0	0	0	0	0	0	0	0	0	0	0	0	0	0	1	0	1	3	0	0	0
163	1	1	1	1.6	62	1	2	1	0	0	0	0	0	0	0	0	0	0	0	0	0	0	0	1	0	1	4	0	0	0
164	2	1	1	1.58	70.2	1	2	0	0	0	0	0	0	0	0	0	0	0	0	0	0	0	0	1	0	0	3	0	0	0
165	1	1	1	1.66	74.5	5	2	0	0	0	0	0	0	0	0	0	0	0	0	0	0	0	0	1	0	0	4	0	0	0
166	1	1	1	1.65	60.7	1	4	1	0	0	0	0	0	0	0	0	0	1	0	0	0	0	0	1	0	0	4	0	0	0
167	2	1	1	1.5	90	1	4	0	0	0	0	0	0	0	0	1	0	0	1	1	1	3	2	1	0	0	4	0	0	0
168	1	1	1	1.82	90	3	2	1	0	0	0	0	0	0	0	0	9999	0	9999	0	9999	0	0	0	0	0	0	0	0	0
169	1	1	1	1.82	80	2	2	1	0	0	0	0	0	0	0	0	0	0	9999	0	9999	0	0	0	0	0	3	0	0	0
172	2	1	1	1.58	58	0	4	0	0	0	0	0	0	0	0	0	0	0	9999	0	9999	0	0	0	0	0	0	0	0	0
173	2	1	1	1.55	36	9999	4	2	0	0	0	0	0	0	0	1	0	0	9999	0	9999	0	0	0	0	0	0	0	0	0
174	2	1	1	1.55	52	0	4	2	0	0	3	0	0	0	0	0	1	1	1	0	0	0	0	1	0	2	4	1	1	0
175	1	1	3	1.7	65	2	2	1	0	0	0	0	0	0	0	0	0	0	0	0	1	6	0	1	0	1	3	0	0	0
176	2	1	1	1.6	72	2	4	0	0	0	0	0	0	0	0	0	0	0	0	0	1	3	2	1	0	0	3	0	0	0
177	1	1	3	1.65	55	2	4	1	0	0	0	0	1	0	0	0	1	1	1	0	0	0	0	1	0	3	3	0	0	0
178	1	1	3	1.57	60	0	4	0	0	0	0	0	0	1	0	1	0	0	0	0	1	5	2	1	0	1	4	0	0	0
179	1	1	3	1.54	70	1	4	2	0	4	0	1	1	1	1	0	0	0	1	2	0	0	0	1	0	1	4	1	0	0
180	2	1	3	1.5	75	0	4	2	0	0	0	0	0	1	0	0	0	0	0	0	1	4	1	1	0	1	4	0	0	0
181	2	1	3	1.6	75	0	2	2	0	0	0	0	0	1	1	0	0	0	0	0	0	0	0	1	0	4	3	0	0	0
182	1	1	3	1.54	55	1	4	2	0	0	0	0	0	1	0	1	0	0	0	0	1	4	1	1	0	2	3	0	0	0
183	2	1	1	1.56	45	0	2	4	1	2	3	0	1	0	0	1	1	1	1	2	1	3	2	1	0	8	4	0	0	0
184	1	1	3	1.4	50	1	4	4	1	4	5	3	2	1	1	0	1	1	0	0	1	6	0	1	0	2	3	1	0	0
185	1	1	1	1.73	70	1	2	0	0	0	0	0	0	0	0	0	0	0	0	0	1	5	2	1	0	0	4	0	0	0
186	2	1	1	1.62	68	1	2	1	0	0	0	0	0	0	0	0	0	0	0	0	0	0	0	1	0	0	4	0	0	0
187	1	1	3	1.57	52	0	1	0	0	0	0	0	0	1	1	0	0	0	0	0	0	0	0	1	0	0	3	0	0	0
188	1	1	3	1.58	53	1	2	1	0	0	0	0	0	0	0	0	0	0	0	0	0	0	0	1	0	0	3	0	0	0
189	2	1	3	1.5	55	0	2	1	0	0	0	0	0	1	0	0	0	0	0	0	0	0	0	1	0	0	3	0	0	0
190	2	1	3	1.58	45	0	4	3	1	3	5	3	2	1	1	0	0	0	0	0	0	0	0	1	0	0	4	1	0	0
191	2	1	3	1.4	74	0	4	2	0	0	0	0	0	1	0	1	0	0	1	2	1	3	2	1	0	0	4	0	0	0
192	1	1	3	1.58	51	1	4	2	0	0	0	0	0	1	1	1	0	0	0	0	0	0	0	1	0	0	4	0	0	0
193	1	1	3	1.6	72	0	4	2	0	0	0	0	0	1	0	1	0	0	0	0	0	0	0	1	0	0	3	0	0	0
194	1	9999	3	1.52	64	1	4	1	0	0	0	0	0	1	1	0	1	1	1	1	1	4	1	1	0	1	3	0	0	0
195	1	1	3	1.66	68	1	4	0	0	0	0	0	0	0	0	1	0	0	1	2	0	0	0	1	0	0	4	0	0	0
196	2	1	3	1.52	56	0	4	0	0	0	0	0	0	1	1	0	0	0	0	0	0	0	0	1	0	0	4	0	0	0
197	2	1	3	1.4	50	2	4	2	0	0	0	0	0	0	0	1	0	0	0	0	0	0	0	1	0	1	3	0	0	0
198	1	1	3	1.58	67	1	4	0	0	0	0	0	0	0	0	1	0	0	0	0	0	0	0	1	0	1	3	0	0	0
199	1	1	6	1.7	70	3	2	2	0	0	0	3	1	0	0	0	0	0	0	0	1	6	0	1	0	4	3	0	0	0
200	2	1	6	1.6	65	1	4	1	0	0	0	0	0	0	0	0	0	0	0	0	1	3	2	1	0	4	4	0	0	0
201	1	1	1	1.73	76	2	2	0	0	0	0	0	0	0	0	0	0	0	0	0	0	0	0	1	0	0	3	0	0	0
202	2	1	1	1.56	55	1	4	3	1	1	10	3	2	1	0	0	0	0	1	2	0	0	0	1	1	0	0	9999	0	0
203	1	1	1	1.6	58	5	2	0	0	0	0	0	0	0	0	0	0	0	0	0	0	0	0	1	0	5	4	0	0	0
204	2	1	2	1.37	42.5	0	4	3	1	2	5	3	2	1	1	0	0	0	1	2	1	4	1	1	1	4	4	0	0	0
205	2	1	1	1.64	68	3	4	2	0	1	3	0	1	1	0	1	0	0	1	1	1	2	2	1	0	1	4	0	0	0
206	2	1	2	1.53	32	5	2	2	0	0	0	0	0	0	0	0	0	0	0	0	0	0	0	1	0	5	4	0	0	1
207	1	1	1	1.7	70	3	2	1	0	1	0	0	1	1	0	1	1	0	1	1	0	0	0	1	0	6	4	0	0	0
208	2	1	2	1.62	55	0	4	2	0	0	2	0	1	0	0	1	1	1	1	1	0	0	0	1	0	3	3	0	0	0
209	2	1	1	1.5	70	3	2	2	0	0	2	1	1	0		0	1	1	0	0	1	3	2	1	0	5	4	1	1	1
210	2	1	1	1.55	80	4	2	4	1	4	3	0	2	0	0	0	0	0	0	0	0	0	0	1	0	3	3	0	0	1
211	1	1	1	1.65	70	5	2	1	0	0	0	0	0	0	0	0	0	0	0	0	0	0	0	1	0	5	4	0	0	1
212	2	1	1	1.6	60	4	2	0	0	0	0	0	0	0	0	0	0	0	0	0	0	0	0	1	0	3	3	0	0	0
215	1	1	1	1.8	70	1	2	3	1	1	0	3	1	1	0	1	1	0	1	2	1	3	2	1	0	6	4	1	1	1
216	2	1	1	1.6	70	0	2	5	1	4	9	3	2	1	1	0	9999	1	1	2	1	3	2	1	0	7	4	1	1	1
218	1	1	1	1.8	85	3	2	0	0	0	0	0	0	0	0	0	0	0	0	0	0	0	0	1	0	3	3	0	0	0
219	1	1	1	1.74	65	4	2	0	0	0	0	0	0	0	0	0	1	0	1	1	1	3	2	1	0	4	4	0	0	0
220	1	1	1	1.68	70	4	2	0	0	0	0	0	0	0	0	0	0	0	0	0	0	0	0	0	0	4	4	0	0	0
221	2	1	1	1.63	55	3	2	1	0	0	0	0	0	0	0	0	1	1	1	0	0	0	0	1	0	4	3	0	0	0
222	1	1	1	1.76	73	1	2	0	0	0	0	0	0	0	0	0	9999	0	9999	0	9999	0	0	0	0	4	4	0	0	0
223	2	1	1	1.6	65	0	2	1	0	0	0	0	0	0	0	0	9999	0	9999	0	9999	0	0	0	0	4	4	0	0	0
224	2	1	1	1.68	60	3	2	4	1	1	5	0	1	1	0	1	1		0	0	9999	0	0	0	0	0	0	9999	0	0
225	2	1	1	1.6	50	2	2	2	0	1	1	1	1	1	1	0	1	1	0	0	0	0	0	1	2	4	4	0	0	0
226	1	1	2	1.68	50	0	4	3	1	1	0	1	1	1	1	1	0	0	0	0	0	0	0	1	0	1	4	0	0	0
228	1	1	1	1.74	140	4	2	1	0	0	0	0	1	0	0	1	9999	0	0	0	1	3	2	1	0	7	4	0	0	0
229	2	1	1	1.57	51	2	2	3	1	0	0	0	0	1	1	1	9999	0	1	0	1	4	1	1	0	6	4	0	0	0
230	1	1	1	1.7	75	5	4	2	0	1	0	2	1	1	1	1	9999	0	1	1	1	3	2	1	0	5	4	0	0	1
231	2	1	1	1.6	50	2	2	2	0	1	0	2	1	1	1	1	9999	0	0	0	1	5	2	1	0	4	4	0	0	0
232	1	1	1	1.65	60	2	2	3	1	1	0	0	1	0	0	1	0	0	0	0	1	4	1	1	0	3	4	0	0	0
233	1	1	1	1.65	69	2	2	3	1	1	0	0	1	0	0	0	1	1	1	1	0	0	0	1	0	1	4	1	0	0
234	2	1	1	1.48	55	2	2	0	0	0	0	0	0	1	1	0	0	0	0	0	0	0	0	1	0	0	3	0	0	0
236	1	1	1	1.7	65	1	2	2	0	0	0	0	0	0	0	0	0	0	0	0	1	6	0	1	0	1	3	0	0	1
237	2	1	2	1.6	40	0	4	3	1	1	0	0	0	0	0	1	0	0	0	0	0	0	0	1	0	0	4	0	0	1
238	1	1	1	1.67	60	0	2	0	0	0	0	0	0	0	0	1	0	0	1	2	1	3	2	1	0	4	3	0	0	0
239	1	1	1	1.75	85	1	4	0	0	0	0	0	0	0	0	1	1	1	1	1	0	0	0	1	0	0	4	0	0	0
240	1	1	1	1.72	71	2	4	1	0	1	0	0	1	0	0	0	1	1	1	0	0	0	0	1	0	0	4	0	0	0
241	2	1	1	1.55	41	1	4	0	0	0	0	0	0	0	0	0	1	0	1	1	0	0	0	1	0	0	4	0	0	0
242	2	1	1	1.5	45	0	4	3	1	0	0	0	0	0	0	1	0	0	0	0	0	0	0	1	0	1	4	0	0	0
243	2	1	2	1.55	50	2	2	0	0	0	0	0	0	0	0	0	0	0	1	2	0	0	0	1	0	1	3	0	0	0
244	1	1	2	1.7	80	0	1	0	0	0	0	0	0	1	0	1	0	0	1	1	1	4	1	1	0	0	3	0	0	0
245	1	1	2	1.7	70	1	3	0	0	0	0	0	0	1	1	0	0	0	1	2	1	3	2	1	0	2	3	0	0	0
246	1	1	2	1.75	70	2	4	0	0	0	0	0	0	1	1	0	0	0	1	2	1	3	2	1	0	1	4	0	0	0
247	2	1	2	1.6	90	0	4	1	0	0	0	0	0	1	1	1	0	0	1	1	1	3	2	1	0	2	4	0	0	0
248	1	1	2	1.6	60	2	4	1	0	0	0	0	0	1	0	0	1	0	0	0	1	4	1	1	0	1	4	0	0	0
249	1	1	2	1.73	70	1	4	1	0	0	0	0	0	1	0	1	0	0	1	1	1	5	2	1	0	3	3	0	0	0
250	1	1	2	1.6	80	0	1	0	0	1	2	1	1	1	0	1	0	0	0	0	1	3	2	1	0	0	3	1	0	0
251	1	1	2	1.75	70	2	2	3	1	4	2	3	2	1	1	0	0	0	1	0	1	3	2	1	0	4	3	0	0	0
252	2	1	2	1.6	60	1	4	1	0	0	0	0	0	1	0	1	0	0	0	1	1	5	2	1	0	0	4	0	0	0
253	1	9999	2	1.75	75	2	4	0	0	0	0	0	0	1	0	1	1	0	0	0	1	5	2	1	0	3	3	0	0	0
254	1	1	2	1.68	56	5	4	0	0	0	0	0	0	1	0	0	0	0	1	1	1	6	0	1	0	1	4	0	0	0
255	2	1	2	1.57	50	1	4	1	0	0	0	0	0	1	0	0	0	0	1	1	1	4	1	1	0	0	4	0	0	0
256	2	1	2	1.65	65	1	4	0	0	0	0	0	0	1	1	0	0	0	1	1	1	4	1	1	0	1	4	0	0	0
257	2	1	2	1.5	60	0	1	2	0	4	2	1	1	1	1	1	0	0	1	2	1	3	2	1	0	0	4	0	0	0
258	1	1	2	1.74	70	1	4	0	0	0	0	0	0	1	1	0	0	0	1	1	1	4	1	1	0	0	4	0	0	0
259	2	1	2	1.55	50	0	4	2	0	4	5	3	1	1	0	0	0	0	0	0	1	4	1	1	0	3	3	0	0	0
260	2	1	2	1.6	60	4	4	0	0	3	0	3	2	1	1	1	0	0	0	0	1	4	1	1	0	1	3	0	0	0
261	1	1	1	1.67	60	0	2	0	0	0	0	0	0	0	0	1	0	0	1	1	1	3	2	1	0	1	3	0	0	0
262	2	1	2	1.63	60	0	2	0	0	0	0	0	0	1	0	0	0	0	0	0	1	3	2	1	0	2	4	0	0	0
263	2	1	2	1.6	80	0	4	2	0	3	2	2	1	1	1	0	0	0	1	2	1	3	2	1	0	2	4	0	0	0
264	1	1	1	1.72	71	2	4	0	0	1	0	0	1	0	0	0	0	0	1	0	0	0	0	1	0	0	4	0	0	0
265	2	1	1	1.65	68	0	4	2	0	0	0	0	0	1	0	0	1	0	1	1	1	4	1	1	0	2	4	0	0	0
266	1	1	1	1.75	75	1	4	1	0	4	0	0	0	1	1	1	1	0	0	0	1	6	0	1	0	1	4	0	0	0
267	1	1	1	1.75	78	1	4	1	0	0	0	0	0	1	0	1	0	0	0	0	1	5	2	1	0	1	4	0	0	0
268	2	1	1	1.5	130	0	4	2	0	0	0	0	1	0	0	0	0	0	9999	0	9999	0	0	0	0	0	0	0	0	0
269	1	1	3	1.6	165	0	1	2	0	4	5	2	1	1	0	1	0	0	0	0	0	0	0	1	0	2	3	0	0	1
270	2	1	3	1.6	70	0	4	2	0	0	0	0	0	1	1	0	0	0	0	0	1	4	1	1	0	2	4	0	0	1
271	2	1	3	1.5	60	1	2	0	0	0	0	0	0	1	0	0	0	0	0	0	1	3	2	1	0	2	4	0	0	1
272	1	1	3	1.7	85	0	2	2	0	0	0	0	0	1	1	0	0	0	0	0	1	3	2	1	0	1	4	0	0	1
273	2	1	3	1.55	70	0	2	0	0	0	0	0	0	1	1	1	0	0	0	0	1	3	2	1	0	2	3	0	0	1
274	1	1	3	1.7	75	1	4	0	0	0	0	0	0	0	0	1	0	0	0	0	1	3	2	1	0	1	3	0	0	1
275	2	1	2	1.52	75	0	4	3	1	3	4	3	2	1	1	0	0	0	0	0	1	1	2	1	0	7	4	1	1	1
276	2	1	1	1.55	60	0	4	4	1	0	0	0	0	0	0	1	1	1	0	0	1	6	0	1	0	10	4	0	0	0
277	2	1	2	1.5	52	1	4	0	0	0	0	0	0	0	0	0	0	0	1	1	1	6	0	1	0	1	4	0	0	0
278	2	1	1	1.55	38	3	2	1	0	0	0	0	0	1	0	0	1	1	0	0	0	0	0	1	0	7	3	0	0	0
279	1	1	1	1.76	65	5	2	2	0	0	0	0	1	1	1	1	0	0	1	0	1	5	2	1	0	4	4	0	0	0
280	2	1	1	1.67	70	3	2	2	0	1	2	0	1	0	0	1	1	1	0	0	1	6	0	1	0	7	4	0	0	0
281	1	1	1	1.67	65	1	1	0	0	0	0	0	0	1	0	0	0	0	0	0	1	4	1	1	0	3	3	0	0	0
282	2	1	1	1.47	62	2	2	1	0	0	0	0	0	1	0	0	0	0	0	0	0	0	0	1	0	3	3	0	0	0
283	1	1	6	1.7	72	0	2	0	0	0	0	0	1	0	0	0	0	0	0	0	0	0	0	1	0	3	3	0	0	0
284	2	1	2	1.6	80	1	4	0	0	0	0	0	0	0	0	0	0	0	1	1	0	0	0	1	0	0	3	0	0	0
285	1	1	2	1.7	70	1	4	1	0	0	0	0	0	1	0	0	0	0	1	1	0	0	0	1	0	6	3	0	0	0
286	2	1	2	1.66	70	1	1	0	0	0	0	0	0	1	0	0	0	0	1	1	0	0	0	1	0	1	3	0	0	0
287	1	1	2	1.6	60	1	1	0	0	0	0	0	0	1	0	0	0	0	1	1	1	3	2	1	0	2	4	0	0	0
288	1	1	2	1.75	70	4	2	1	0	0	0	0	0	1	0	1	0	0	1	1	0	0	0	1	0	4	4	0	0	0
289	2	1	2	1.67	65	1	2	0	0	0	0	0	0	0	0	0	0	0	0	0	0	0	0	1	0	1	3	0	0	0
290	2	1	2	1.6	70	1	4	0	0	0	0	0	0	1	0	0	0	0	0	0	0	0	0	1	0	1	4	0	0	0
291	2	1	2	1.65	60	1	4	1	0	0	0	0	0	1	0	0	0	0	0	0	0	0	0	1	0	0	4	0	0	0
292	2	1	2	1.6	65	2	4	1	0	0	0	0	0	1	0	0	0	0	1	1	0	0	0	1	0	1	4	0	0	0
293	2	1	2	1.6	65	1	4	1	0	0	0	0	0	1	1	0	0	0	0	0	1	3	2	1	0	1	4	0	0	0
294	2	1	2	1.62	60	1	1	0	0	0	0	0	0	0	0	0	0	0	0	0	0	0	0	1	0	2	3	0	0	0
295	2	1	2	1.6	50	0	4	1	0	0	0	0	0	1	1	0	0	0	0	0	1	4	1	1	0	0	4	0	0	0
296	2	1	2	1.65	70	1	4	1	0	0	0	0	0	1	1	0	0	0	1	1	0	0	0	1	0	3	3	0	0	0
297	1	1	1	1.65	65	1	3	2	0	0	0	0	0	1	1	0	0	0	0	0	0	0	0	1	0	1	2	0	0	0
298	2	1	2	1.55	60	1	4	1	0	0	0	0	0	1	1	0	0	0	0	0	0	0	0	1	0	1	0	0	0	0
299	1	1	2	1.65	70	1	2	1	0	0	0	0	0	1	1	0	0	0	0	0	1	4	1	1	0	0	4	0	0	0
300	1	1	2	1.65	50	0	1	4	1	1	0	1	2	1	1	1	1	1	1	1	1	3	2	1	0	3	3	0	0	0
301	2	1	2	1.65	50	1	3	4	1	3	0	0	1	0	0	0	0	0	0	0	0	0	0	1	0	1	1	1	1	0
302	2	1	2	1.55	60	1	3	1	0	0	0	0	0	0	0	0	0	0	0	0	0	0	0	1	0	1	3	0	0	0
303	1	1	2	1.72	75	1	2	2	0	4	0	0	0	1	1	1	0	0	0	0	1	3	2	1	0	2	4	0	0	0
304	1	1	2	1.65	60	1	2	3	1	4	0	0	0	0	0	1	0	0	0	0	0	0	0	1	0	3	3	0	0	0
305	2	1	2	1.55	70	1	4	1	0	0	0	0	0	1	1	0	0	0	1	1	1	3	2	1	0	2	4	0	0	0
306	1	1	2	1.65	55	1	2	2	0	0	0	0	0	0	0	0	0	0	0	0	0	0	0	1	0	1	3	0	0	0
307	2	1	2	1.6	58	0	4	1	0	0	0	0	0	0	0	0	0	0	1	1	0	0	0	1	0	1	3	0	0	0
308	2	1	2	1.6	60	1	4	2	0	0	0	0	0	0	0	0	0	0	0	0	0	0	0	1	0	1	4	0	0	0
309	2	1	2	1.62	60	1	4	2	0	0	0	0	0	1	1	0	0	0	0	0	0	0	0	1	0	1	3	0	0	0
310	2	1	2	1.58	55	0	4	2	0	0	0	0	0	1	1	0	0	0	0	0	1	3	2	1	0	0	4	0	0	0
311	2	1	2	1.6	56	1	2	2	0	0	0	0	0	1	1	0	0	0	0	0	0	0	0	1	0	1	3	0	0	0
312	2	1	2	1.62	65	0	4	1	0	0	0	0	0	1	1	0	0	0	0	0	1	4	1	1	0	1	4	0	0	0
313	2	1	2	1.62	55	1	4	2	0	0	0	0	0	1	1	0	0	0	0	0	0	0	0	1	0	2	1	0	0	0
314	1	1	2	1.65	70	1	4	1	0	4	0	0	0	1	1	0	0	0	1	0	1	3	2	1	0	1	3	0	0	0
315	1	1	2	1.73	65	1	4	1	0	0	0	0	0	0	0	0	0	0	0	0	0	0	0	1	0	1	4	0	0	0
317	1	1	2	1.73	65	1	4	1	0	0	0	0	0	1	1	0	0	0	0	0	1	3	2	1	0	6	4	0	0	0
318	2	1	2	1.6	55	4	4	0	0	0	0	0	0	1	0	1	0	1	0	0	0	0	0	1	0	1	4	0	0	0
321	1	1	2	1.6	70	3	2	0	0	0	0	0	0	0	0	0	1	0	0	0	1	6	0	1	0	1	4	0	0	0
322	1	1	2	1.67	70	0	4	0	0	0	0	0	0	0	0	0	0	0	0	0	1	3	2	1	0	1	4	0	0	0
323	1	1	2	1.68	60	5	2	2	0	4	0	2	1	1	1	0	0	0	1	1	1	4	1	1	0	2	3	0	0	0
324	1	1	2	1.68	60	3	2	2	0	3	0	2	1	1	1	1	0	0	1	1	1	4	1	1	0	1	4	0	0	0
325	1	1	2	1.73	60	2	4	2	0	3	0	2	1	0	0	0	0	0	0	0	0	0	0	1	0	5	3	0	0	0
326	2	1	2	1.6	65	0	4	2	0	4	0	2	1	1	1	0	0	0	1	1	0	0	0	1	0	1	3	0	0	0
327	1	1	2	1.73	70	0	4	0	0	0	0	0	0	1	0	0	0	0	0	0	1	4	1	1	0	2	4	0	0	0
328	2	1	1	1.5	80	0	4	4	1	4	0	3	2	1	1	0	0	0	1	0	0	0	0	1	0	2	4	0	0	0
329	1	1	2	1.62	55	0	4	2	0	3	0	3	1	1	1	1	0	0	0	0	1	5	2	1	0	1	4	0	0	0
330	1	1	2	1.65	50	1	4	3	1	3	0	3	1	1	1	0	0	0	1	1	1	5	2	1	0	1	3	0	0	0
331	2	1	2	1.5	50	0	4	2	0	3	3	3	2	0	0	0	0	0	0	0	1	3	2	1	0	2	4	0	0	0
332	2	1	2	1.59	70	0	2	2	0	3	1	2	1	1	1	0	0	0	1	1	1	3	2	1	0	3	4	0	0	0
333	1	1	2	1.68	80	1	2	2	0	3	0	2	1	1	1	0	0	0	1	1	1	3	2	1	0	2	4	0	0	0
334	2	1	2	1.65	55	2	4	2	0	4	0	2	1	1	1	0	0	0	1	1	1	3	2	1	0	2	4	0	0	0
335	2	1	2	1.6	70	0	4	2	0	4	0	3	1	1	1	0	0	0	1	1	1	3	2	1	0	1	4	0	0	0
336	2	1	2	1.65	60	3	4	2	0	2	0	2	1	1	0	1	0	0	1	2	1	3	2	1	0	1	4	0	0	0
337	2	1	2	1.41	42	1	4	2	0	3	8	2	1	1	1	0	0	0	1	1	1	4	1	1	0	3	4	0	0	0
338	2	1	2	1.55	5	0	4	4	1	4	4	2	2	1	1	0	0	0	1	2	1	3	2	1	0	0	4	0	0	0
339	2	1	2	1.5	70	0	4	2	0	4	2	3	2	1	1	0	0	0	1	1	1	4	1	1	0	1	4	0	0	0
340	2	1	2	1.5	50	0	4	2	0	4	5	2	2	1	1	0	0	0	1	1	0	0	0	1	0	0	3	0	0	0
341	1	1	2	1.73	70	1	2	2	0	2	0	2	1	1	1	0	0	0	1	2	1	3	2	1	0	1	3	0	0	0
342	1	1	2	1.75	71	1	3	2	0	0	0	0	0	1	1	1	1	1	0	0	1	4	1	1	0	1	3	0	0	0
343	1	1	2	1.7	65	1	4	0	0	4	0	0	0	1	1	0	0	0	0	0	1	3	2	1	0	3	3	0	0	0
344	2	1	2	1.5	59.5	1	4	2	0	0	0	0	0	1	1	0	0	0	0	0	1	3	2	1	0	3	4	0	0	0
345	2	1	2	1.68	150	0	4	1	0	0	0	0	0	1	1	0	0	0	0	0	1	6	0	1	0	0	4	0	0	0
346	1	1	2	1.65	70	3	4	2	0	1	3	0	1	0	0	1	0	0	1	2	0	0	0	1	0	0	4	0	0	0
347	1	1	2	1.75	76	3	4	3	1	3	3	0	1	0	0	0	0	0	1	0	0	0	0	1	0	4	3	0	0	0
348	2	1	1	1.55	57	1	2	0	0	0	0	0	0	0	0	0	0	0	0	0	0	0	0	1	0	3	3	0	0	0
350	2	1	2	1.6	65	0	4	2	0	0	0	0	0	0	0	0	0	0	1	1	0	0	0	1	0	5	4	0	0	0
351	2	1	2	1.52	50	1	4	2	0	4	0	0	0	1	1	0	0	0	0	0	1	5	2	1	0	1	4	0	0	0
352	1	1	2	1.75	130	1	2	1	0	0	0	0	0	1	1	0	0	0	1	2	1	4	1	1	0	2	4	0	0	0
353	2	1	2	1.6	120	1	4	2	0	0	0	0	0	0	0	1	0	0	0	0	0	0	0	1	0	1	4	0	0	1
354	1	9999	2	1.72	70	0	4	1	0	0	0	0	0	0	0	1	0	0	0	0	1	6	0	1	0	1	4	0	0	0
355	1	1	2	1.7	65	2	4	2	0	3	0	2	1	1	1	0	0	0	1	1	1	6	0	1	0	1	4	0	0	0
356	2	1	2	1.59	55	1	4	2	0	1	0	0	1	0	0	1	0	0	1	1	1	3	2	1	0	2	4	0	0	0
357	2	1	2	1.72	70	1	4	0	0	4	0	0	0	1	1	0	0	0	0	0	0	0	0	1	0	2	4	0	0	0
358	1	1	2	1.65	60	2	4	1	0	0	0	0	0	0	1	0	0	0	1	1	9999	0	0	1	0	1	4	0	0	0
359	1	1	2	1.7	75	3	4	0	0	0	0	0	1	0	0	0	0	0	1	0	0	0	0	1	0	1	4	0	0	0
360	2	1	2	1.65	80	2	4	0	0	1	0	0	1	0	0	0	0	0	1	0	0	0	0	1	0	1	4	0	0	0
361	1	1	2	1.65	70	3	2	0	0	0	0	0	0	0	0	0	0	0	0	0	0	0	0	1	0	0	4	0	0	0
362	2	1	2	1.5	50	1	2	1	0	0	0	0	0	1	0	0	0	0	0	0	1	6	0	1	0	0	3	0	0	0
363	1	1	2	1.69	71	2	2	1	0	0	0	0	0	0	0	1	0	0	1	1	1	4	1	1	0	3	4	0	0	0
364	2	2	2	1.6	150	2	2	5	1	4	3	0	2	0	0	0	0	0	0	0	0	0	0	1	0	2	4	0	0	1
365	2	1	1	1.58	49	3	2	3	1	0	0	0	1	0	0	0	1	1	1	0	0	0	0	1	0	5	3	1	1	0
366	1	1	1	1.6	65	3	2	4	1	1	2	1	1	0	0	1	0	0	1	2	0	0	0	1	1	7	4	1	1	0
368	1	1	1	1.7	55	3	2	5	1	3	3	3	2	0	0	0	1	1	1	2	0	0	0	1	1	8	4	0	0	1
369	2	1	1	1.55	58	1	4	4	1	2	5	2	1	0	0	1	0	0	1	2	0	0	0	1	0	9	4	0	0	0
370	2	1	1	1.56	70	1	4	1	0	0	0	0	0	0	0	0	0	0	9999	0	9999	0	0	0	0	0	0	9999	0	0
371	2	1	1	1.46	78	1	2	3	1	1	2	0	1	0	0	1	1	1	0	0	1	6	0	1	0	9999	4	0	0	0
372	2	1	1	1.7	160	1	2	2	0	0	0	0	0	0	0	0	0	0	0	0	0	0	0	0	0	0	3	0	0	0
373	1	1	1	1.74	72	2	2	3	1	0	2	0	1	0	0	1	1	1	1	1	0	0	0	1	0	7	4	0	0	0
374	2	1	1	1.48	53.9	0	2	1	0	0	0	0	0	0	0	1	0	0	0	0	0	0	0	1	0	4	3	0	0	0
375	1	1	1	1.7	80	2	2	0	0	0	0	0		0	0	0	0	0	0	0	0	0	0	1	0	3	3	0	0	0
376	1	1	1	1.7	90	4	4	1	0	0	0	0	0	1	1	0	0	0	1	1	0	0	0	1	0	4	3	0	0	0
377	2	1	1	1.64	63	3	4	1	0	0	0	0	0	0	0	0	0	0	1	0	0	0	0	1	0	5	4	0	0	0
378	2	1	1	1.62	70	1	4	0	0	1	1	0	1	1	0	0	1	1	0	0	0	0	0	1	0	4	4	0	0	0
379	1	1	1	1.68	72	1	2	0	0	0	0	0	0	0	0	0	0	0	0	0	0	0	0	1	0	3	3	0	0	0
380	2	1	1	1.58	70	2	2	1	0	0	0	0	1	0	0	0	0	0	0	0	0	0	0	1	0	3	3	0	0	0
381	2	1	2	1.67	73	2	4	1	0	0	0	0	0	0	0	0	1	1	1	1	0	0	0	1	0	0	3	0	0	0
382	2	1	1	1.6	62	0	4	0	0	0	0	0	0	0	0	0	0	0	1	0	1	4	1	1	0	6	4	0	0	0
383	1	1	2	1.7	60	1	2	0	0	0	0	0	0	0	0	0	0	0	0	0	1	6	0	1	0	0	3	0	0	0
384	1	1	2	1.84	84	3	2	0	0	0	0	0	0	0	0	0	0	0	0	0	0	0	0	1	0	0	3	0	0	0
385	2	1	2	1.63	69	1	2	0	0	0	0	0	0	1	0	0	0	0	0	0	1	6	0	1	0	1	3	0	0	0
386	2	1	2	1.58	52	0	4	0	0	0	0	0	0	1	0	0	0	0	0	0	0	0	0	1	0	2	4	0	0	0
387	2	1	2	1.6	75.5	0	2	3	1	1	2	0	1	1	0	0	0	0	1	2	0	0	0	1	0	1	3	0	0	0
388	1	1	2	1.7	56	3	2	0	0	0	0	0	0	0	0	0	0	0	1	1	1	6	0	1	0	1	4	0	0	0
389	1	1	6	1.65	72	2	2	3	1	2	0	0	1	0	0	0	0	0	1	2	0	0	0	1	0	10	3	9999	0	0
390	2	1	6	1.6	70	3	2	2	0	4	0	1	1	1	0	0	0	0	0	0	1	6	0	1	0	7	4	0	0	0
391	2	1	6	1.6	80	3	2	3	1	0	0	0	0	1	0	1	0	0	0	0	0	0	0	1	0	5	3	0	0	0
392	2	1	6	1.63	80	2	4	1	0	0	0	0	0	0	0	0	1	1	1	0	0	0	0	1	0	3	3	0	0	0
393	2	1	6	1.55	72	0	4	2	0	4	7	0	2	1	0	0	0	0	0	0	1	6	0	1	0	4	4	1	0	0
394	2	9999	6	1.58	75	1	1	1	0	0	0	0	0	0	0	0	0	0	0	0	0	0	0	1	0	3	3	0	0	0
395	2	1	6	1.5	55	0	2	1	0	0	0	0	0	1	0	0	0	0	0	0	0	0	0	1	0	4	4	0	0	0
396	2	1	6	1.55	60	0	4	2	0	0	0	0	0	1	0	0	0	0	1	2	0	0	0	1	0	4	3	0	0	0
397	2	1	6	1.5	42	1	4	0	0	0	0	0	0	1	1	1	0	0	0	0	1	5	2	1	0	4	4	0	0	0
398	2	1	6	1.6	55	0	2	2	0	0	0	0	0	1	0	0	0	0	0	0	1	6	0	1	0	6	4	0	0	0
399	2	1	6	1.5	55	0	4	4	1	4	3	3	1	0	0	0	1	1	0	0	1	4	1	1	0	4	4	0	0	0
400	1	1	6	1.62	60	3	2	1	0	0	0	0	0	0	0	0	0	0	1	2	0	0	0	1	0	0	4	0	0	0
401	2	1	6	1.5	50	1	2	2	0	0	0	0	0	0	0	0	0	0	1	2	0	0	0	1	0	0	4	0	0	0
402	2	1	6	1.6	65	0	4	3	1	2	2	0	1	0	0	1	0	0	0	0	0	0	0	1	0	0	4	0	0	0
403	2	1	6	1.65	65	0	4	3	1	4	0	3	3	1	0	0	0	0	0	0	1	0	0	0	0	0	4	9999	0	0
404	2	9999	6	1.6	50	0	2	3	1	0	0	0	0	1	0	0	0	0	0	0	1	3	2	1	0	0	4	0	0	0
405	2	1	6	1.5	55	1	2	2	0	0	0	0	0	1	1	0	0	0	1	1	1	3	2	1	0	0	4	0	0	0
406	2	1	6	1.5	48	0	4	1	0	0	0	0	0	1	0	1	0	0	0	0	0	0	0	1	0	0	4	0	0	0
407	2	1	6	1.5	45	0	4	0	0	0	0	0	0	0	0	0	0	0	0	0	1	4	1	1	0	0	4	0	0	0
409	2	1	6	1.5	70	1	4	2	0	0	0	1	1	1	0	0	0	0	0	0	1	5	2	1	0	0	4	0	0	0
410	2	1	6	1.48	47	0	4	3	1	0	0	0	0	1	0	0	0	0	0	0	1	4	1	1	0	0	4	0	0	0
411	1	1	6	1.58	50	2	2	2	0	0	0	0	0	1	0	0	0	0	0	0	0	0	0	1	0	0	4	0	0	0
412	1	1	6	1.65	70	2	4	2	0	0	0	0	0	1	0	1	0	0	0	0	1	3	2	1	0	0	4	0	0	0
413	1	1	6	1.6	60	0	2	0	0	0	0	0	0	0	0	0	0	0	0	0	0	0	0	1	0	0	3	0	0	0
414	2	1	6	1.65	80	0	2	3	1	4	0	0	1	1	1	0	0	0	0	0	0	0	0	1	0	0	3	0	0	1
415	2	9999	6	1.6	40	0	1	2	0	0	0	0	0	1	0	0	0	0	0	0	1	6	0	1	0	0	4	0	0	0
416	2	1	6	1.7	80	0	2	2	0	0	0	0	0	1	0	0	0	0	0	0	0	0	0	1	0	0	3	0	0	0
417	2	1	6	1.55	65	0	4	3	1	0	0	0	0	1	0	0	0	0	0	0	0	0	0	1	0	0	4	0	0	0
418	2	1	6	1.66	55	5	4	0	0	0	0	0	0	1	0	0	0	0	0	0	1	4	1	1	0	0	4	0	0	0
419	2	1	6	1.65	65	2	4	2	0	0	0	0	1	1	1	1	0	0	0	0	1	5	2	1	0	0	4	0	0	0
420	2	1	6	1.6	55	0	4	4	1	2	3	1	1	1	1	0	0	0	0	0	1	1	2	1	0	0	4	9999	0	0
421	2	1	6	1.58	80	0	4	3	1	0	0	0	0	1	0	0	0	0	1	0	0	0	0	1	0	0	3	0	0	0
422	1	1	6	1.7	70	2	2	3	1	0	0	0	0	1	0	0	0	0	0	0	1	3	2	1	0	0	4	0	0	0
423	2	9999	6	1.6	50	0	2	2	0	0	0	0	0	1	0	0	0	0	0	0	1	6	0	1	0	0	3	0	0	0
424	1	1	6	1.7	70	0	2	3	1	0	0	0	0	1	0	0	0	0	0	0	1	3	2	1	0	0	4	0	0	0
425	1	1	6	1.6	85	1	4	1	0	0	0	0	0	1	0	0	0	0	1	1	1	3	2	1	0	0	4	0	0	0
426	2	1	6	1.5	60	0	2	4	1	4	5	3	2	1	0	1	0	0	0	0	1	6	0	1	1	0	4	0	0	0
427	2	1	6	1.6	65	1	4	2	0	4	0	0	1	1	1	1	0	0	1	1	1	6	0	1	0	0	3	0	0	1
428	2	1	6	1.55	50	0	4	2	0	0	0	0	0	0	0	0	0	0	1	0	0	0	0	1	0	0	4	0	0	0
429	2	1	6	1.55	65	0	2	2	0	0	0	0	0	0	0	0	0	0	0	0	0	0	0	1	0	0	4	0	0	0
430	2	1	6	1.6	65	0	4	2	0	2	0	1	1	1	0	0	0	0	1	1	1	3	2	1	0	0	4	0	0	0
431	2	9999	6	1.5	50	0	4	3	1	0	0	0	0	0	0	1	0	0	0	0	1	6	0	1	0	0	2	0	0	0
432	1	9999	6	1.7	55	2	4	1	0	0	0	0	0	0	0	0	0	0	9999	0	9999	0	0	1	0	0	4	0	0	0
433	2	1	6	1.65	45	4	4	0	0	0	0	0	0	0	0	0	0	0	0	0	0	0	0	1	0	0	4	0	0	0
434	2	1	6	1.6	65	2	4	1	0	0	0	0	0	0	0	0	0	0	0	0	0	0	0	1	0	0	4	0	0	0
435	1	1	6	1.65	66.5	1	2	1	0	0	0	0	0	0	0	0	0	0	0	0	0	0	0	1	0	0	3	0	0	0
436	1	1	6	1.77	55	3	4	0	0	0	0	0	0	0	0		0	0	0	0	0	0	0	1	0	0	4	0	0	0
437	1	9999	6	1.7	60	1	2	0	0	0	0	0	0	1	1	0	0	0	0	0	1	3	2	1	0	0	4	0	0	0
438	1	1	6	1.65	80	1	2	2	0	0	0	0	0	0	0	0	0	0	1	0	0	0	0	1	0	0	4	0	0	0
439	2	1	6	1.54	50	0	4	1	0	0	0	0	0	1	0	1	0	0	1	2	1	3	2	1	0	0	4	0	0	0
440	2	1	6	1.76	80	5	2	2	0	0	0	0	0	0	0	1	0	0	0	0	0	0	0	1	0	0	4	0	0	0
441	1	1	6	1.7	50	2	2	3	1	0	0	0	0	1	0	0	0	0	0	0	1	3	2	1	0	0	4	0	0	0
442	2	1	6	1.5	68	4	2	3	1	1	0	0	1	0	0	0	0	0	1	0	0	0	0	1	0	0	4	0	0	0
443	1	1	6	1.6	66	3	2	1	0	0	0	0	0	1	1	0	1	0	0	0	1	5	2	1	0	0	4	0	0	0
444	1	1	6	1.65	72	3	4	2	0	0	0	0	0	1	0	0	0	0	0	0	0	0	0	1	0	0	4	0	0	0
445	1	1	6	1.74	70	2	2	3	1	0	0	0	0	1	0	0	0	0	0	0	1	3	2	1	0	0	4	0	0	0
446	2	1	6	1.55	55	0	2	2	0	0	0	0	0	1	0	0	0	0	1	1	1	3	2	1	0	0	3	0	0	0
447	1	1	6	1.75	65	3	4	0	0	0	0	0	0	0	0	0	0	0	0	0	0	0	0	1	0	0	4	0	0	0
448	2	9999	6	1.6	72	0	4	1	0	0	0	0	0	0	0	0	0	0	1	0	0	0	0	1	0	0	3	0	0	0
449	2	1	6	1.56	75	2	2	3	1	0	8	0	1	1	0	0	0	0	1	0	0	0	0	1	0	0	3	0	0	0
450	2	1	6	1.6	80	0	4	2	0	1	3	0	1	1	0	1	0	0	0	0	1	3	2	1	0	0	4	0	0	0
451	2	9999	6	1.59	52	3	4	0	0	0	0	0	0	0	0	0	0	0	0	0	0	0	0	1	0	0	4	0	0	0
452	2	1	6	1.6	55	0	4	2	0	0	0	0	0	1	0	0	1	1	1	2	0	0	0	1	0	0	4	0	0	0
453	1	1	6	1.68	60	9999	9999	3	1	1	0	0	1	0	0	0	0	0	0	0	0	0	0	1	0	0	4	0	0	0
454	2	9999	9999	1.6	70	9999	9999	3	1	1	0	0	1	1	0	0	0	0	0	0	1	5	2	1	0	0	3	9999	0	0
455	2	1	1	1.6	116	0	4	3	1	4	0	0	0	0	0	0	0	0	9999	0	9999	0	0	0	0	0	0	9999	0	0
456	2	9999	9999	1.67	67	9999	9999	1	0	0	0	0	0	0	0	0	0	0	9999	0	9999	0	0	0	0	0	0	9999	0	0
457	2	1	1	1.6	60	2	2	2	0	0	0	0	0	1	0	0	0	0	9999	0	9999	0	0	0	0	0	0	0	0	0
458	1	9999	9999	1.71	80	9999	9999	3	1	0	0	0	0	0	0	0	0	0	9999	0	9999	0	0	0	0	0	0	0	0	0
459	2	9999	9999	1.5	49	9999	9999	1	0	0	0	0	0	0	0	0	0	0	9999	0	9999	0	0	0	0	0	0	0	0	0
460	2	9999	9999	1.57	51	9999	9999	2	0	0	0	0	0	0	0	0	0	0	9999	0	9999	0	0	0	0	0	0	0	0	0
461	2	9999	9999	1.62		9999	9999	2	0	4	0	3	0	0	0	0	0	0	9999	0	9999	0	0	0	0	0	0	9999	0	0
462	1	9999	9999	1.74	85	9999	9999	0	0	4	0	0	0	0	0	0	0	0	9999	0	9999	0	0	0	0	0	0	0	0	0
463	1	9999	9999	1.72	60	9999	9999	1	0	0	0	0	0	0	0	0	0	0	9999	0	9999	0	0	0	0	0	0	0	0	0
464	1	9999	9999	1.65	50	9999	9999	2	0	2	0	0	0	0	0	0	0	0	9999	0	9999	0	0	0	0	0	0	9999	0	0
465	1	9999	9999	1.74		9999	9999	3	1	4	0	0	0	0	0	0	0	0	9999	0	9999	0	0	0	0	0	0	9999	0	0
466	1	9999	9999	1.55		9999	9999	3	1	4	0	0	0	0	0	0	0	0	9999	0	9999	0	0	0	0	0	0	9999	0	0
467	1	9999	9999	1.75	70	9999	9999	3	1	4	0	0	0	0	0	0	0	0	9999	0	9999	0	0	0	0	0	0	9999	0	0
468	1	9999	9999	1.75	80	9999	9999	0	0	0	0	0	0	0	0	0	0	0	9999	0	9999	0	0	0	0	0	0	0	0	0
469	1	9999	9999	1.75	62	9999	9999	1	0	0	0	0	0	0	0	0	0	0	9999	0	9999	0	0	0	0	0	0	0	0	0
470	1	9999	9999	1.7	70	9999	9999	1	0	0	0	0	0	0	0	0	0	0	9999	0	9999	0	0	0	0	0	0	0	0	0
471	1	9999	9999	1.8	90	9999	9999	2	0	4	0	0	0	0	0	0	0	0	9999	0	9999	0	0	0	0	0	0	9999	0	0
472	1	9999	9999	1.75		9999	9999	2	0	4	0	0	0	0	0	0	0	0	9999	0	9999	0	0	0	0	0	0	9999	0	0
473	1	9999	9999	1.73	57	9999	9999	0	0	0	0	0	0	0	0	0	0	0	9999	0	9999	0	0	0	0	0	0	0	0	0
474	1	1	2	1.7	75	2	2	1	0	0	0	0	0	0	0	0	1	1	0	0	0	0	0	1	0	4	4	0	0	0
475	1	9999	9999	1.65		9999	9999	3	1	4	0	0	0	0	0	0	0	0	9999	0	9999	0	0	0	0	0	0	9999	0	0
476	2	9999	9999	1.65	70	9999	9999	1	0	0	0	0	0	0	0	0	0	0	9999	0	9999	0	0	0	0	0	0	0	0	0
478	1	9999	9999	1.73	70	9999	9999	0	0	0	0	0	0	0	0	0	0	0	9999	0	9999	0	0	1	0	0	0	0	0	0
479	1	9999	9999	1.66	90	9999	9999	1	0	0	0	0	0	0	0	0	0	0	9999	0	9999	0	0	0	0	0	0	0	0	0
480	2	9999	9999	1.53	41	9999	9999	0	0	0	0	0	0	0	0	0	0	0	9999	0	9999	0	0	0	0	0	0	0	0	0
481	2	1	1	1.5	46	0	4	3	1	1	2	0	1	1	1	1	1	1	1	1	1	6	0	0	0	2	4	0	0	0
482	2	1	1	1.6	55	4	4	2	0	4	0	0	0	0	0	0	0	0	0	0	0	0	0	0	0	0	4	0	0	0
483	2	9999	6	1.6	60	0	2	2	0	0	0	0	0	1	1	0	0	0	0	0	1	6	0	0	0	0	4	0	0	0
484	1	9999	6	1.7	65	1	1	3	1	2	0	0	2	1	0	0	0	0	1	2	1	3	2	0	0	6	4	0	0	1
485	1	1	1	1.72	75	3	2	1	0	0	0	0	0	1	0		0	0	0	0	0	0	0	0	0	0	3	0	0	0
486	1	9999	6	1.72	70	1	2	1	0	0	0	0	0	0	0	1	0	0	0	0	0	0	0	0	0	0	3	0	0	0
487	2	1	1	1.53	41	0	2	3	1	1	1	0	1	0	0	0	0	0	0	0	1	6	0	0	0	1	2	0	0	1
488	2	1	1	1.45	54	1	2	1	0	0	0	0	0	1	1	0	0	0	9999	0	0	0	0	0	0	3	3	0	0	0
489	2	1	1	1.7	90	0	2	1	0	0	0	0	0	1	1	0	0	0	0	0	0	0	0	0	0	1	4	0	0	0
490	1	1	1	1.65	70	0	4	0	0	0	0	0	0	0	0	0	0	0	9999	0	9999	0	0	0	0	0	3	0	0	0
491	2	1	2	1.64	60	2	3	1	0	0	0	0	0	0	0	0	0	0	1	1	0	0	0	1	0	0	3	0	0	0
492	1	1	6	1.75	100	2	4	1	0	0	0	0	0	1	1	1	0	0	1	1	1	3	2	1	0	7	4	0	0	0
493	1	1	1	1.75	90	3	2	5	1	3	3	0	0	1	0	0	0	0	1	1	1	4	1	1	0	3	4	0	0	0
494	2	1	6	1.57	65	2	2	1	0	0	0	0	0	0	0	1	1	1	0	0	0	0	0	1	0	1	3	0	0	0
495	1	1	6	1.72	75	1	2	1	0	0	0	0	0	0	0	0	0	0	0	0	0	0	0	1	0	1	2	0	0	0
496	1	1	1	1.68	61.5	4	4	2	0	1	5	0	1	1	1	0	0	0	1	1	1	3	2	1	0	2	4	1	1	0
497	2	1	6	1.55	56	0	2	0	0	0	0	0	0	1	1	0	0	0	0	0	0	0	0	1	0	1	3	0	0	1
498	1	1	1	1.65	70	1	2	4	1	3	0	2	1	1	1	0	0	0	1	2	1	3	2	1	0	3	4	0	0	1
499	2	1	3	1.55	80	0	2	1	0	0	0	0	0	1	1	0	0	0	0	0	0	0	0	1	0	1	3	0	0	1
500	1	1	1	1.65	65	5	4	3	1	4	0	0	0	1	1	1	0	0	0	0	0	0	0	1	0	4	4	0	0	1
501	1	1	1	1.7	90	3	4	4	1	1	0	0	1	0	0	1	1	1	0	0	0	0	0	1	0	2	4	0	0	1
502	2	1	1	1.6	68	1	4	2	0	0	0	0	0	1	0	0	0	0	1	0	0	0	0	1	0	2	3	0	0	1
503	1	1	1	1.8	90	1	4	2	0	0	0	3	1	1	1	0	0	0	0	0	0	0	0	1	0	1	3	1	1	1
505	2	1	1	1.45	44	1	2	0	0	0	0	0	0	0	0	0	0	0	1	1	0	0	0	1	0	1	4	0	0	1
506	2	1	1	1.5	64	0	2	0	0	0	0	0	0	0	0	0	0	0	1	1	1	3	2	1	0	2	4	0	0	1
507	2	1	1	1.5	70	0	2	0	0	0	0	0	0	0	0	0	0	0	1	1	0	0	0	1	0	1	4	0	0	1
508	2	1	1	1.4	59	0	2	2	0	2	3	3	1	0	0	0	1	0	1	1	0	0	0	1	0	1	4	0	0	1
509	2	1	1	1.48	71	2	2	1	0	0	0	0	0	0	0	0	0	0	1	1	0	0	0	1	0	1	3	0	0	1
510	2	1	1	1.53	41	0	2	1	0	0	0	0	0	0	0	0	1	1	1	1	0	0	0	1	0	1	3	0	0	1
511	2	1	3	1.55	46	0	2	1	0	0	0	0	0	0	0	0	1	1	1	1	0	0	0	1	0	1	3	0	0	1
512	2	1	1	1.6	61	0	2	1	0	0	0	0	0	0	0	0	0	0	1	1	0	0	0	1	0	1	4	0	0	1
513	1	1	6	1.76	60	0	2	4	1	1	4	3	1	0	0	1	1	1	0	0	0	0	0	1	0	1	3	0	0	1
514	2	1	1	1.65	85	3	2	0	0	0	0	0	0	0	0	0	1	0	1	1	0	0	0	1	0	1	3	0	0	1
515	2	1	6	1.58	40	0	2	1	0	0	0	0	0	0	0	0	1	1	1	1	0	0	0	1	0	2	3	0	0	1
516	1	1	1	1.68	65	1	2	0	0	0	0	0	0	0	0	0	0	0	1	1	0	0	0	1	0	2	3	0	0	1
517	1	1	6	1.58	55	2	4	4	1	3	0	3	1	1	1	0	0	0	0	0	1	4	1	1	0	2	4	0	0	1
518	1	1	4	1.55	70	3	2	1	0	0	0	0	0	0	0	0	1	0	1	1	0	0	0	1	0	2	4	0	0	1
519	2	1	3	1.59	72.5	1	2	1	0	0	0	0	0	0	0	0	1	0	1	1	0	0	0	1	0	1	3	0	0	1
520	2	1	2	1.58	60	1	4	3	1	0	5	0	1	0	0	1	0	0	0	0	0	0	0	1	0	6	3	0	0	1
521	2	1	6	1.56	56	1	2	2	0	0	3	0	1	0	0	0	1	0	1	1	0	0	0	1	0	1	3	0	0	1
522	2	1	2	1.58	60	0	2	0	0	0	0	0	0	0	0	0	0	0	1	1	0	0	0	1	0	6	3	0	0	1
523	2	1	6	1.5	61	1	4	1	0	0	0	0	0	0	0	0	1	0	1	0	0	0	0	1	0	4	4	0	0	1
524	2	1	6	1.58	50	1	4	4	1	3	0	3	1	1	0	0	0	0	0	0	0	0	0	1	0	1	4	0	0	0
525	2	1	6	1.6	65	2	2	0	0	0	0	0	0	0	0	0	0	0	0	0	0	0	0	1	0	1	3	0	0	0
526	1	1	6	1.68	70	2	2	0	0	0	0	0	0	0	0	0	0	0	0	0	0	0	0	1	0	1	3	0	0	0
527	2	1	2	1.62	65	1	4	2	0	4	0	3	1	1	1	0	0	0	1	1	1	6	0	1	0	1	4	0	0	0
528	2	1	2	1.6	55	0	4	2	0	1	0	0	1	1	1	0	0	0	0	0	0	0	0	1	0	1	4	0	0	0
529	2	1	2	1.64	66	0	4	1	0	0	0	0		1	1	1	0	0	0	0	0	0	0	1	0	2	4	0	0	0
530	2	1	2	1.67	60	0	2	0	0	0	0	0	0	1	1	0	0	0	0	0	1	3	2	1	0	1	4	0	0	0
531	1	1	2	1.69	75	1	2	1	0	0	0	0	0	0	0	0	1	1	1	1	0	0	0	1	0	1	4	0	0	0
532	2	1	2	1.59	41	0	4	0	0	0	0	0	0	1	0	1	0	0	1	0	1	4	1	1	0	2	4	0	0	0
533	2	1	2	1.6	60	1	2	0	0	0	0	0	0	0	0	0	0	0	1	1	0	0	0	1	0	1	3	0	0	0
534	1	1	2	1.75	92.5	3	2	0	0	0	0	0	0	0	0	0	0	0	1	1	0	0	0	1	0	1	3	0	0	0
535	1	1	1	1.6	70	1	2	1	0	0	0	0	0	1	0	0	0	0	0	0	0	0	0	1	0	2	3	0	0	0
536	1	1	6	1.65	45	1	4	2	0	1	0	1	1	0	0	1	0	0	0	0	0	0	0	1	0	1	4	0	0	0
537	2	1	6	1.63	85	2	2	1	0	0	0	0	0	0	0	0	1	1	0	0	0	0	0	1	0	2	2	0	0	0
538	2	1	1	1.47	45	4	4	1	0	0	0	0	0	0	0	0	0	0	1	1	1	3	2	1	0	0	4	0	0	0
539	2	1	6	1.62	75	1	2	3	1	2	0	2	1	1	1	0	0	0	0	0	1	3	2	1	0	3	3	0	0	0
540	2	1	6	1.5	40	1	2	3	1	1	0	1	1	0	0	0	1	1	0	0	0	0	0	1	0	2	3	0	0	0
542	1	1	6	1.69	65	1	2	0	0	0	0	0	0	0	0	0	0	0	0	0	0	0	0	1	0	0	2	0	0	0
543	2	1	6	1.58	55	0	2	2	0	0	0	1	1	0	0	0	1	1	0	0	0	0	0	1	0	1	2	0	0	0
544	2	1	6	1.6	50	2	2	4	1	2	2	2	1	0	0	1	1	1	0	0	0	0	0	1	0	7	3	0	0	0
545	1	1	6	1.78	70	2	2	0	0	0	0	0	0	0	0	0	0	0	0	0	0	0	0	1	0	1	3	0	0	0
546	2	1	6	1.6	65	1	2	2	0	1	0	1	1	0	0	1	0	0	0	0	0	0	0	1	0	0	4	0	0	0
547	2	1	6	1.6	55	1	4	3	1	1	0	1	1	0	0	1	1	1	0	0	1	4	1	1	0	1	4	0	0	0
548	2	1	1	1.6	70	0	4	4	1	0	0	0	0	1	1	0	0	0	1	1	0	0	0	1	0	2	4	0	0	1
549	2	1	1	1.8	65	3	2	1	0	0	0	0	0	0	0	0	1	1	1	0	0	0	0	1	0	0	4	0	0	0
550	2	1	1	1.55	56	3	2	3	1	0	0	0	0	0	0	0	0	0	0	0	0	0	0	1	0	0	4	0	0	0
552	2	1	2	1.63	52	3	4	0	0	0	0	0	0	1	1	0	1	1	0	0	1	3	2	1	0	2	4	0	0	0
554	2	1	4	1.5	60	3	4	2	0	0	0	0	0	0	0	1	0	0	0	0	0	0	0	1	1	0	3	0	0	1
6666	2	1	6	1.65	60	2	4	3	1	4	2	0	2	1	0	0	1	1	0	0	1	6	0	1	0	0	3	0	0	1

## Sheet: 3
SEQN	Gender	EthnicitEthnicity	RA	Nursing home	Height	Weight	Education	Marital status	WLT	RBGE	FRAIL	FRAIL level	ADL	Morse	VAS	SPF	EQ-5D	CIS	MMSE	SPPB	MS	MNA.SF	VS	VA	HS	HISS	HIL	Depression	SAS	Comorbidity	Age index	Social support	Abuse score	Abuse risk	Caregiver supp.I
3	2	1	2	1	1.6	65	1	2	2	7	2	0	3	2	0	2	1	1	1	1	0	0	0	0	0	0	0	1	0	2	3	0	0	0	0
15	1	1	3	1	1.8	75	2	4	2	NA	4	1	2	3	0	1	1	1	0	0	0	0	0	0	0	0	0	1	0	4	4	0	0	0	1
17	2	1	3	1	1.64	60	2	4	2	7	3	1	4	1	0	2	1	1	1	0	0	0	0	0	0	0	0	1	2	1	3	0	0	0	1
18	2	1	3	1	1.55	56	0	4	2	7	1	0	0	0	0	0	0	1	1	0	0	0	0	0	0	0	0	1	0	0	4	0	0	0	1
19	2	1	3	1	1.6	60	0	4	2	7	2	0	4	1	0	2	1	1	1	0	0	0	0	0	0	0	0	1	0	1	4	0	0	0	1
20	1	1	3	1	1.7	61	2	2	2	7	3	1	2	2	0	1	1	1	1	0	1	1	0	0	0	0	0	1	0	1	4	0	0	0	1
21	2	1	3	1	1.58	65	0	2	2	NA	3	1	2	2	6	1	1	1	1	0	0	0	0	0	1	3	2	1	0	1	4	0	0	0	1
22	1	1	3	1	1.7	55	0	4	2	7	1	0	0	0	0	0	0	1	0	1	0	0	0	0	1	3	2	1	0	2	4	0	0	0	1
23	2	1	3	1	1.58	62	0	4	2	7	2	0	2	2	5	3	1	1	1	0	0	0	0	0	0	0	0	1	0	1	3	0	0	0	1
26	1	1	6	1	1.6	70	0	1	2	7	1	0	4	0	0	0	0	1	1	0	0	0	0	0	1	6	0	1	0	2	3	0	0	0	1
27	1	1	6	1	1.65	60	0	1	2	7	0	0	4	0	0	0	0	0	0	0	0	0	0	0	0	0	0	1	0	3	3	0	0	0	1
28	1	1	6	1	1.75	65	1	1	2	7	0	0	4	0	0	0	0	1	1	0	0	0	0	0	0	0	0	1	0	3	3	0	0	0	1
29	1	1	6	1	1.6	80	0	1	2	7	1	0	4	0	0	0	0	0	0	0	0	0	NA	0	0	0	0	1	0	4	4	0	0	0	1
30	1	1	6	1	1.5	60	0	1	2	7	1	0	4	0	0	0	0	1	1	0	0	0	1	0	1	3	2	1	0	3	3	0	0	0	1
31	1	NA	6	1	1.65	70	1	1	2	7	2	0	0	0	0	0	0	1	1	1	0	0	1	0	1	6	0	1	0	5	4	0	0	0	1
32	1	1	6	1	1.71	73	2	1	2	7	0	0	0	0	0	0	0	1	0	0	0	0	1	1	1	3	2	1	0	4	3	0	0	0	1
33	1	1	6	1	1.7	80	0	1	2	7	2	0	0	0	0	0	0	1	1	0	1	1	0	0	1	3	2	1	0	10	3	0	0	0	1
34	1	1	6	1	1.6	57.5	0	1	2	7	2	0	0	1	2	0	1	0	0	0	0	0	1	0	0	0	0	1	0	3	3	0	0	0	1
35	1	1	6	1	1.65	60	0	1	2	7	3	1	0	0	0	0	0	1	0	1	0	0	0	0	1	4	1	1	0	5	3	0	0	0	1
36	1	1	6	1	1.6	65	0	1	2	7	2	0	1	1	0	2	1	1	0	0	1	1	1	2	1	6	0	1	0	4	3	0	0	0	1
37	2	1	1	0	1.49	61	3	2	1	1	0	0	0	0	0	0	0	1	0	0	0	0	0	0	0	0	0	1	0	6	4	0	0	0	1
38	2	1	1	0	1.56	73	4	2	1	1	0	0	0	0	0	0	0	1	1	0	0	0	NA	0	NA	0	0	1	0	4	3	0	0	0	1
39	1	1	1	0	1.8	95	2	2	5	3	2	0	0	1	0	0	1	0	0	0	0	0	1	1	0	0	0	1	0	0	3	NA	0	0	1
40	1	1	1	0	1.73	62	3	2	1	1	1	0	0	0	0	0	1	0	0	0	0	0	1	2	1	3	2	1	0	3	3	0	0	0	1
41	2	1	1	0	1.6	55	0	4	1	5	2	0	0	1	2	2	1	0	0	0	0	0	1	2	1	4	1	1	0	7	3	0	0	0	1
42	2	1	1	0	1.58	51	3	2	1	2	0	0	0	0	0	0	0	1	0	1	0	0	1	2	1	4	1	1	0	5	4	0	0	0	1
43	1	1	1	0	1.72	51	5	2	1	2	0	0	0	0	0	0	0	0	0	0	1	1	1	0	1	6	0	1	0	5	4	0	0	0	1
44	2	1	1	0	1.58	70	1	2	1	2	1	0	0	0	0	0	0	1	1	1	0	0	1	2	NA	0	0	1	0	6	3	0	0	0	1
45	1	1	1	0	1.63	80	2	2	1	2	0	0	0	0	0	0	0	0	0	0	0	0	1	1	1	4	1	1	0	4	3	0	0	0	1
46	2	1	1	0	1.47	60	1	4	5	2	2	0	0	2	2	0	1	1	0	0	0	0	1	1	1	3	2	1	0	6	4	0	0	0	1
47	2	1	1	0	1.66	75	0	2	5	3	1	0	0	0	0	0	0	0	0	0	0	0	0	0	0	0	0	0	0	0	3	0	0	0	1
48	1	1	1	0	1.66	135	5	4	5	2	3	1	1	0	8	0	1	0	0	0	0	0	1	2	0	0	0	1	0	7	4	0	0	0	1
49	1	1	1	0	1.6	65	4	2	1	1	0	0	0	0	0	0	0	0	0	0	0	0	0	0	NA	0	0	1	0	7	4	0	0	0	1
50	2	1	1	0	1.65	75	1	4	5	2	2	0	0	0	0	0	1	0	0	1	0	0	0	0	0	0	0	1	0	1	3	1	3	1	1
51	2	1	1	0	1.55	67	3	2	1	1	1	0	0	0	0	0	0	1	0	0	0	0	1	1	1	5	2	1	1	4	4	0	0	0	1
52	1	1	1	0	1.7	65	5	2	1	1	0	0	0	0	0	0	0	1	0	0	0	0	0	0	1	3	2	1	1	4	4	0	0	0	1
55	1	1	1	0	1.69	64.9	2	2	0	8	1	0	0	0	0	0	0	0	0	0	1	0	1	0	0	0	0	1	0	1	3	0	0	0	1
57	2	1	1	0	1.57	70.3	2	4	1	2	2	0	0	0	1	0	1	0	0	0	0	0	0	0	0	0	0	1	0	1	3	0	0	0	1
58	1	1	1	0	1.73	61.3	2	2	5	2	0	0	0	0	0	0	0	0	0	0	0	0	0	0	0	0	0	1	0	0	4	0	0	0	1
59	1	1	1	0	1.5	62.2	1	4	1	2	3	1	0	0	0	0	0	1	1	1	0	0	0	0	1	3	2	1	0	0	3	0	0	0	1
60	2	1	1	0	1.59	67	2	2	0	2	1	0	0	0	0	0	0	0	0	0	0	0	0	0	0	0	0	1	0	0	3	0	0	0	1
61	1	1	1	0	1.7	71	1	2	0	2	0	0	0	0	0	0	0	0	0	0	0	0	0	0	0	0	0	1	0	0	3	0	0	0	1
62	1	1	6	0	1.65	75	0	1	2	7	3	1	0	0	0	0	0	0	0	0	0	0	0	0	0	0	0	1	0	3	3	0	0	0	1
63	1	1	1	0	1.65	65	0	2	0	8	0	0	0	0	0	0	0	0	0	1	0	0	0	0	0	0	0	1	0	0	3	0	0	0	1
64	1	1	6	0	1.7	73	0	1	2	7	3	1	4	3	3	0	1	0	0	0	1	1	0	0	0	0	0	1	0	3	3	0	0	0	1
66	1	1	1	0	1.66	70	3	4	1	1	1	0	0	0	0	0	0	0	0	0	0	0	0	0	0	0	0	1	0	0	4	0	0	0	1
67	2	1	1	0	1.6	56	0	4	1	2	2	0	0	0	0	0	0	1	1	0	0	0	0	0	1	6	0	1	0	1	4	0	0	0	1
68	1	1	3	0	1.67	60	2	2	5	1	0	0	0	0	0	0	0	0	0	1	1	1	0	0	0	0	0	1	0	0	3	0	0	0	1
69	1	1	1	0	1.7	70	2	2	5	1	2	0	1	1	0	3	1	0	0	1	0	0	0	0	0	0	0	1	0	1	4	0	0	0	1
70	2	1	1	0	1.68	60	3	4	1	1	0	0	0	0	0	0	1	0	0	0	0	0	0	0	0	0	0	1	0	0	4	1	0	0	1
71	2	1	1	0	1.5	65	2	2	5	1	1	0	0	0	0	0	0	0	0	1	0	0	1	1	0	0	0	1	0	0	3	0	0	0	1
72	2	1	1	0	1.55	60	0	4	5	2	0	0	0	0	0	0	0	0	0	0	0	0	0	0	0	0	0	1	0	0	4	0	0	0	1
73	2	1	2	0	1.6	60	0	4	5	2	1	0	0	0	0	0	0	0	0	0	1	1	0	0	1	5	2	1	0	0	4	0	0	0	0
75	1	NA	1	0	1.68	67	3	2	5	8	0	0	0	0	0	0	0	0	0	0	0	0	0	0	0	0	0	1	0	0	4	0	0	0	0
76	2	1	1	0	1.52	64	1	2	5	8	0	0	0	0	0	0	0	0	0	0	0	0	0	0	0	0	0	1	0	0	3	0	0	0	0
77	1	1	1	0	1.47	60	1	2	0	8	0	0	0	0	0	0	0	0	0	0	0	0	0	0	0	0	0	1	0	0	3	0	0	0	0
78	1	1	1	0	1.76	60	3	2	0	8	0	0	0	0	0	0	0	0	0	0	1	0	0	0	0	0	0	1	0	0	4	0	0	0	0
79	1	1	1	0	1.62	74.3	1	2	0	8	0	0	0	0	0	0	0	0	0	0	0	0	0	0	0	0	0	1	0	1	3	0	0	0	1
80	2	1	1	0	1.55	120	2	4	5	2	0	0	0	0	0	0	0	0	0	1	1	1	0	0	0	0	0	1	0	0	4	0	0	0	0
81	2	1	1	0	1.55	70.8	1	2	0	5	0	0	0	0	0	0	0	0	0	0	0	0	0	0	0	0	0	1	0	0	4	0	0	0	1
82	2	1	1	0	1.6	50	0	2	0	3	2	0	0	0	0	0	0	1	0	0	0	0	1	0	0	0	0	1	0	2	4	0	0	0	0
83	1	1	1	0	1.6	65	3	2	0	3	0	0	0	0	0	0	0	0	0	0	0	0	0	0	0	0	0	1	0	1	4	0	0	0	0
84	2	1	1	0	1.53	57.3	0	4	5	1	0	0	0	0	0	0	0	0	0	0	0	0	0	0	0	0	0	1	0	1	4	0	0	0	1
85	1	1	3	0	1.75	80	2	4	1	3	0	0		0	0	0	0	0	0	1	0	0	1	0	1	5	2	1	0	1	4	0	0	0	0
88	2	1	3	0	1.6	50	0	4	5	1	2	0	1	3	1	2	1	1	1	1	1	1	1	2	1	4	1	1	0	1	3	0	0	0	1
89	2	1	1	0	1.57	65	1	2	5	3	2	0	0	2	5	0	1	1	1	0	0	0	1	1	0	0	0	1	0	4	3	0	0	0	0
90	1	1	1	0	1.65	63	1	2	5	3	4	1	1	2	2	0	1	1	0	0	0	0	1	1	0	0	0	1	0	5	4	0	0	0	0
91	2	1	1	0	1.6	58	4	4	1	2	3	1	0	0	0	0	0	1	1	0	1	1	1	1	1	3	2	1	0	4	4	0	0	0	0
92	1	1	1	0	1.7	82	3	3	1	2	0	0	0	0	0	0	0	0	0	0	0	0	0	0	0	0	0	1	0	2	3	0	0	0	0
93	2	2	1	0	1.56	57	2	4	1	2	0	0	0	0	0	0	0	0	0	0	1	1	0	0	0	0	0	1	0	0	4	0	0	0	0
94	1	1	1	0	1.56	115	2	2	5	3	3	1	1	2	3	0	1	0	0	1	1	1	1	1	1	4	1	1	0	0	4	0	0	0	1
95	1	1	1	0	1.67	90	2	2	0	2	0	0	0	0	0	0	0	0	0	1	0	0	0	0	0	0	0	1	0	0	3	0	0	0	1
96	2	1	1	0	1.42	39.5	1	2	0	2	0	0	0	0	0	0	0	0	0	1	0	0	0	0	0	0	0	1	0	0	3	0	0	0	0
97	1	1	1	0	1.65	96.2	3	2	0	1	1	0	0	0	0	0	0	0	0	0	0	0	0	0	0	0	0	1	0	0	3	0	0	0	1
98	2	1	1	0	1.52	62.3	2	2	0	1	3	1	4	3	3	3	2	1	0	1	0	0	0	0	1	6	0	1	0	2	3	0	0	0	1
99	2	1	1	0	1.6	50	3	2	0	1	0	0	0	0	0	0	0	0	0	0	0	0	1	1	0	0	0	1	0	0	0	0	0	0	0
101	1	1	1	0	1.7	80	2	2	1	1	1	0	0	0	0	0	0	1	0	0	0	0	0	0	0	0	0	1	0	0	3	0	0	0	0
102	1	1	1	0	1.68	70	2	2	3	1	5	1	0	3	5	3	2	1	1	0	1	1	0	0	0	0	0	1	0	1	4	0	0	0	1
103	2	1	1	0	1.55	75	1	2	1	NA	0	0	0	0	0	0	0	0	0	0	0	0	0	0	0	0	0	1	0	0	3	0	0	0	0
104	2	1	3	0	1.52	44	1	2	0	2	1	0	0	0	0	0	1	0	0	0	0	0	0	0	1	3	2	1	0	1	3	0	0	0	0
105	2	1	1	0	1.62	75	1	2	5	1	4	1	2	2	0	0	1	0	0	1	1	1	0	0	0	0	0	1	0	0	3	0	0	0	0
106	1	1	3	1	1.63	60	1	4	2	7	3	1	1	1	0	0	1	1	0	0	1	1	0	0	1	6	0	1	0	2	3	0	0	0	1
107	1	1	3	1	1.72	70	1	4	2	NA	2	0	0	0	0	0	0	1	1	0	1	1	0	0	1	6	0	1	0	0	4	0	0	0	1
108	1	1	3	1	1.6	60	0	4	2	7	1	0	0	0	0	0	0	1	0	1	0	0	0	0	1	4	1	1	0	2	3	0	0	0	1
109	1	1	3	1	1.7	70	1	4	2	7	0	0	0	0	0	0	0	1	0	1	0	0	0	0	1	4	1	1	0	0	4	0	0	0	0
110	1	1	1	0	1.7	65	5	2	0	8	0	0	0	0	0	0	0	0	0	0	0	0	0	0	0	0	0	1	0	0	4	0	0	0	0
111	1	1	1	0	1.6	60	2	2	5	1	1	0	0	0	0	0	0	0	0	0	1	1	0	0	0	0	0	1	0	2	4	0	0	0	0
112	2	1	1	0	1.53	60	2	2	0	8	1	0	0	0	0	0	0	0	0	0	0	0	0	0	0	0	0	1	0	0	3	0	0	0	0
113	2	1	3	1	1.58	60	0	4	2	7	2	0	4	0	2	3	1	1	1	0	0	0	0	0	1	4	1	1	0	1	4	0	0	0	1
114	1	1	3	1	1.6	65	0	4	2	7	3	1	4	1	0	3	1	1	1	0	0	0	0	0	1	4	1	1	0	4	4	1	0	0	1
115	2	1	1	0	1.55	54	0	4	1	NA	1	0	0	0	0	0	0	0	0	0	0	0	0	0	0	0	0	1	0	1	4	0	0	0	0
116	2	1	3	1	1.6	65	0	3	2	7	2	0	4	0	0	3	1	1	0	0	0	0	0	0	1	6	0	1	0	0	3	0	0	0	0
117	2	1	3	1	1.55	50	0	4	2	7	2	0	0	0	0	0	0	1	0	0	0	0	0	0	1	4	1	1	0	5	4	0	0	0	1
118	1	1	3	1	1.68	70	0	2	2	7	0	0	0	0	0	0	0	1	0	0	0	0	0	0	1	3	2	1	0	0	4	0	0	0	0
119	2	1	3	1	1.48	40	0	4	2	7	2	0	0	0	0	0	0	1	1	0	0	0	0	0	1	3	2	1	0	5	3	0	0	0	1
120	1	1	3	1	1.7	63	3	4	2	7	0	0	0	0	0	0	0	0	0	0	0	0	0	0	1	4	1	1	0	0	4	0	0	0	0
121	2	1	3	1	1.55	60	1	4	2	7	0	0	0	0	0	0	0	0	0	0	0	0	0	0	0	0	0	1	0	2	4	0	0	0	1
123	2	1	1	0	1.5	55	3	2	5	1	4	1	1	3	2	0	1	0	0	1	0	0	1	2	1	6	0	1	0	3	4	0	0	0	0
124	1	1	3	1	1.65	65	3	4	2	7	2	0	0	0	0	0	0	1	0	0	0	0	0	0	1	3	2	1	0	0	4	0	0	0	0
125	1	1	3	1	1.77	70	0	4	2	7	2	0	0	0	0	0	0	1	1	0	0	0	0	0	0	0	0	1	0	2	3	0	0	0	1
126	2	1	3	1	1.55	60	0	4	2	7	2	0	2	1	0	1	1	1	1	1	0	0	0	0	1	4	1	1	0	0	4	1	1	1	0
127	2	1	3	1	1.55	50	0	4	2	7	2	0	4	1	0	3	2	1	0	0	0	0	1	2	1	3	2	1	0	3	4	0	0	0	1
128	1	1	3	1	1.58	55	3	4	2	7	2	0	4	0	2	3	1	1	1	0	0	0	0	0	1	4	1	1	0	0	4	1	0	0	0
129	2	1	1	0	1.52	50	0	4	1	1	0	0	0	0	0	0	0	0	0	0	1	0	0	0	0	0	0	1	0	0	4	0	0	0	0
130	2	1	1	0	1.65	68	3	2	5	1	0	0	0	0	0	0	0	0	0	0	0	0	0	0	0	0	0	1	0	0	4	0	0	0	0
131	1	1	1	0	1.65	58	2	2	0	8	1	0	0	0	0	0	0	0	0	0	NA	0	0	0	0	0	0	1	0	0	3	0	0	0	0
132	2	1	1	0	1.56	43	2	2	0	8	3	1	0	0	0	0	0	0	0	0	0	0	1	2	0	0	0	1	0	0	3	0	0	0	0
133	1	1	1	0	1.74	50	2	2	5	3	2	0	0	0	0	0	0	1	1	0	1	1	0	0	1	3	2	1	0	2	4	0	0	0	1
134	1	1	2	0	1.63	66	1	2	1	1	0	0	0	0	0	0	0	0	0	0	0	0	1	0	1	3	2	1	0	0	4	0	0	0	0
135	2	1	2	0	1.5	67	1	2	1	1	0	0	0	0	0	0	0	0	0	0	0	0	1	0	0	0	0	1	0	0	4	0	0	0	0
136	1	1	1	0	1.76	60	4	2	5	2	0	0	0	0	0	0	0	0	0	0	0	0	0	0	1	3	2	1	0	1	4	0	0	0	0
137	2	1	1	0	1.56	72	1	4	1	2	2	0	1	3	2	0	1	0	0	1	1	1	1	1	1	4	1	1	0	0	4	0	0	0	0
138	1	1	1	0	1.7	80	1	4	5	1	0	0	0	0	0	0	0	0	0	0	0	0	0	0	0	0	0	1	0	0	4	0	0	0	0
140	2	1	1	0	1.75	55	2	4	5	3	5	1	4	2	2	3	1	0	0	0	1	1	1	1	0	0	0	1	0	2	4	0	0	0	0
141	1	1	1	0	1.7	60	1	4	5	1	0	0	0	0	0	0	0	0	0	0	0	0	0	0	0	0	0	1	0	0	4	0	0	0	0
142	1	1	1	0	1.68	70	1	2	1	1	0	0	0	0	0	0	0	0	0	0	0	0	0	0	0	0	0	1	0	0	4	0	0	0	0
143	2	1	1	0	1.53	60	0	2	1	1	1	0	0	0	0	0	0	0	0	0	0	0	0	0	0	0	0	1	0	0	4	0	0	0	0
144	2	1	1	0	1.63	77	3	2	0	8	0	0	0	0	0	0	0	0	0	0	0	0	0	0	0	0	0	1	0	1	3	0	0	0	0
145	2	1	1	0	1.52	65	0	2	0	8	0	0	0	0	0	0	0	0	0	0	0	0	0	0	0	0	0	1	0	0	4	0	0	0	0
146	2	NA	NA	0	1.5	125	1	4	5	1	3	1	0	0	0	0	0	0	0	0	0	0	NA	0	NA	0	0	0	0	0	4	0	0	0	0
147	2	1	1	0	1.53	65	0	2	0	8	0	0	0	0	0	0	0	0	0	0	0	0	0	0	0	0	0	1	0	0	4	0	0	0	0
148	2	1	1	0	1.53	65	1	2	0	8	4	1	2	2	2	2	1	0	0	0	0	0	1	1	1	4	1	1	0	0	4	0	0	0	0
149	2	1	1	0	1.52	65	0	4	5	1	2	0	1	2	0	0	1	0	0	0	0	0	0	0	0	0	0	1	0	1	4	0	0	0	0
150	2	1	1	0	1.5	64	1	2	5	1	0	0	0	0	0	0	0	0	0	0	0	0	0	0	0	0	0	1	0	0	4	0	0	0	0
151	2	1	1	0	1.54	62	0	4	1	2	0	0	0	0	0	0	0	0	0	0	1	0	0	0	0	0	0	1	0	0	4	0	0	0	0
152	1	1	1	0	1.58	55	0	4	1	1	1	0	0	0	0	0	0	0	0	0	0	0	0	0	0	0	0	1	0	0	4	0	0	0	0
153	1	1	1	0	1.73	83	1	2	5	1	0	0	0	0	0	0	0	0	0	0	0	0	0	0	1	3	2	1	0	0	4	0	0	0	0
154	1	1	1	0	1.6	55	0	4	5	1	1	0	0	0	0	0	0	0	0	0	0	0	0	0	0	0	0	1	0	0	3	0	0	0	0
155	2	1	1	0	1.67	76	1	2	1	8	0	0	0	0	0	0	0	0	0	0	0	0	0	0	0	0	0	1	0	0	3	0	0	0	0
156	1	1	1	0	1.72	70	0	3	1	2	0	0	0	0	0	0	0	0	0	0	0	0	0	0	0	0	0	1	0	0	3	0	0	0	0
157	2	1	1	0	1.62	75	0	2	5	1	1	0	0	0	0	0	0	0	0	0	0	0	0	0	0	0	0	1	0	0	4	0	0	0	0
158	2	1	1	0	1.5	72	0	4	5	2	3	1	1	3	4	0	1	0	0	0	0	0	0	0	0	0	0	1	0	7	4	NA	0	0	0
159	2	1	1	0	1.53	56	0	2	5	1	2	0	1	2	0	2	1	0	1	1	0	0	0	0	0	0	0	1	0	0	0	0	0	0	0
160	2	1	1	0	1.53	57	0	4	1	1	0	0	0	0	0	0	0	0	0	0	0	0	0	0	0	0	0	1	0	1	3	0	0	0	0
161	2	1	1	0	1.5	79	0	2	0	8	1	0	0	0	0	0	0	0	0	0	0	0	NA	0	0	0	0	1	0	0	3	0	0	0	0
163	1	1	1	0	1.6	62	1	2	5	1	1	0	0	0	0	0	0	0	0	0	0	0	0	0	0	0	0	1	0	1	4	0	0	0	0
164	2	1	1	0	1.58	70.2	1	2	5	8	0	0	0	0	0	0	0	0	0	0	0	0	0	0	0	0	0	1	0	0	3	0	0	0	0
165	1	1	1	0	1.66	74.5	5	2	5	8	0	0	0	0	0	0	0	0	0	0	0	0	0	0	0	0	0	1	0	0	4	0	0	0	0
166	1	1	1	0	1.65	60.7	1	4	1	1	1	0	0	0	0	0	0	0	0	0	0	1	0	0	0	0	0	1	0	0	4	0	0	0	0
167	2	1	1	0	1.5	90	1	4	5	1	0	0	0	0	0	0	0	0	0	1	0	0	1	1	1	3	2	1	0	0	4	0	0	0	0
168	1	1	1	0	1.82	90	3	2	0	2	1	0	0	0	0	0	0	0	0	0	NA	0	NA	0	NA	0	0	0	0	0	0	0	0	0	0
169	1	1	1	0	1.82	80	2	2	1	2	1	0	0	0	0	0	0	0	0	0	0	0	NA	0	NA	0	0	0	0	0	3	0	0	0	0
172	2	1	1	0	1.58	58	0	4	5	1	0	0	0	0	0	0	0	0	0	0	0	0	NA	0	NA	0	0	0	0	0	0	0	0	0	0
173	2	1	1	0	1.55	36	NA	4	1	2	2	0	0	0	0	0	0	0	0	1	0	0	NA	0	NA	0	0	0	0	0	0	0	0	0	0
174	2	1	1	0	1.55	52	0	4	5	1	2	0	0	2	3	0	0	0	0	0	1	1	1	0	0	0	0	1	0	2	4	1	3	1	0
175	1	1	3	0	1.7	65	2	2	1	1	1	0	0	0	0	0	0	0	0	0	0	0	0	0	1	6	0	1	0	1	3	0	0	0	0
176	2	1	1	0	1.6	72	2	4	1	2	0	0	0	0	0	0	0	0	0	0	0	0	0	0	1	3	2	1	0	0	3	0	0	0	0
177	1	1	3	0	1.65	55	2	4	1	1	1	0	0	1	0	0	1	0	0	0	1	1	1	0	0	0	0	1	0	3	3	0	0	0	0
178	1	1	3	1	1.57	60	0	4	2	7	0	0	0	0	0	0	0	1	0	1	0	0	0	0	1	5	2	1	0	1	4	0	0	0	0
179	1	1	3	1	1.54	70	1	4	2	7	2	0	4	2	0	1	1	1	1	0	0	0	1	2	0	0	0	1	0	1	4	1	0	0	0
180	2	1	3	1	1.5	75	0	4	2	7	2	0	0	0	0	0	0	1	0	0	0	0	0	0	1	4	1	1	0	1	4	0	0	0	0
181	2	1	3	1	1.6	75	0	2	2	7	2	0	0	0	0	0	0	1	1	0	0	0	0	0	0	0	0	1	0	4	3	0	0	0	0
182	1	1	3	1	1.54	55	1	4	2	7	2	0	0	0	0	0	0	1	0	1	0	0	0	0	1	4	1	1	0	2	3	0	0	0	0
183	2	1	1	0	1.56	45	0	2	2	1	4	1	2	3	3	0	1	0	0	1	1	1	1	2	1	3	2	1	0	8	4	0	0	0	0
184	1	1	3	1	1.4	50	1	4	2	7	4	1	4	2	5	3	2	1	1	0	1	1	0	0	1	6	0	1	0	2	3	1	0	0	0
185	1	1	1	0	1.73	70	1	2	0	8	0	0	0	0	0	0	0	0	0	0	0	0	0	0	1	5	2	1	0	0	4	0	0	0	0
186	2	1	1	0	1.62	68	1	2	0	1	1	0	0	0	0	0	0	0	0	0	0	0	0	0	0	0	0	1	0	0	4	0	0	0	0
187	1	1	3	1	1.57	52	0	1	2	7	0	0	0	0	0	0	0	1	1	0	0	0	0	0	0	0	0	1	0	0	3	0	0	0	0
188	1	1	3	0	1.58	53	1	2	0	1	1	0	0	0	0	0	0	0	0	0	0	0	0	0	0	0	0	1	0	0	3	0	0	0	0
189	2	1	3	0	1.5	55	0	2	0	1	1	0	0	0	0	0	0	1	0	0	0	0	0	0	0	0	0	1	0	0	3	0	0	0	0
190	2	1	3	1	1.58	45	0	4	2	7	3	1	3	2	5	3	2	1	1	0	0	0	0	0	0	0	0	1	0	0	4	1	0	0	0
191	2	1	3	1	1.4	74	0	4	2	7	2	0	0	0	0	0	0	1	0	1	0	0	1	2	1	3	2	1	0	0	4	0	0	0	0
192	1	1	3	1	1.58	51	1	4	2	7	2	0	0	0	0	0	0	1	1	1	0	0	0	0	0	0	0	1	0	0	4	0	0	0	0
193	1	1	3	1	1.6	72	0	4	2	7	2	0	0	0	0	0	0	1	0	1	0	0	0	0	0	0	0	1	0	0	3	0	0	0	0
194	1	NA	3	1	1.52	64	1	4	2	7	1	0	0	0	0	0	0	1	1	0	1	1	1	1	1	4	1	1	0	1	3	0	0	0	0
195	1	1	3	1	1.66	68	1	4	2	7	0	0	0	0	0	0	0	0	0	1	0	0	1	2	0	0	0	1	0	0	4	0	0	0	0
196	2	1	3	1	1.52	56	0	4	2	7	0	0	0	0	0	0	0	1	1	0	0	0	0	0	0	0	0	1	0	0	4	0	0	0	0
197	2	1	3	1	1.4	50	2	4	2	7	2	0	0	0	0	0	0	0	0	1	0	0	0	0	0	0	0	1	0	1	3	0	0	0	0
198	1	1	3	1	1.58	67	1	4	2	7	0	0	0	0	0	0	0	0	0	1	0	0	0	0	0	0	0	1	0	1	3	0	0	0	0
199	1	1	6	0	1.7	70	3	2	0	3	2	0	0	1	0	3	1	0	0	0	0	0	0	0	1	6	0	1	0	4	3	0	0	0	0
200	2	1	6	0	1.6	65	1	4	5	1	1	0	0	0	0	0	0	0	0	0	0	0	0	0	1	3	2	1	0	4	4	0	0	0	0
201	1	1	1	0	1.73	76	2	2	0	2	0	0	0	0	0	0	0	0	0	0	0	0	0	0	0	0	0	1	0	0	3	0	0	0	0
202	2	1	1	0	1.56	55	1	4	5	1	3	1	1	3	10	3	2	1	0	0	0	0	1	2	0	0	0	1	1	0	0	NA	0	0	0
203	1	1	1	0	1.6	58	5	2	1	1	0	0	0	0	0	0	0	0	0	0	0	0	0	0	0	0	0	1	0	5	4	0	0	0	0
204	2	1	2	0	1.37	42.5	0	4	1	2	3	1	2	3	5	3	2	1	1	0	0	0	1	2	1	4	1	1	1	4	4	0	0	0	0
205	2	1	1	0	1.64	68	3	4	1	2	2	0	1	1	3	0	1	1	0	1	0	0	1	1	1	2	2	1	0	1	4	0	0	0	0
206	2	1	2	0	1.53	32	5	2	1	2	2	0	0	0	0	0	0	0	0	0	0	0	0	0	0	0	0	1	0	5	4	0	0	0	1
207	1	1	1	0	1.7	70	3	2	5	1	1	0	1	1	0	0	1	1	0	1	1	0	1	1	0	0	0	1	0	6	4	0	0	0	0
208	2	1	2	0	1.62	55	0	4	1	2	2	0	0	1	2	0	1	0	0	1	1	1	1	1	0	0	0	1	0	3	3	0	0	0	0
209	2	1	1	0	1.5	70	3	2	1	2	2	0	0	0	2	1	1	0		0	1	1	0	0	1	3	2	1	0	5	4	1	2	1	1
210	2	1	1	0	1.55	80	4	2	1	2	4	1	4	3	3	0	2	0	0	0	0	0	0	0	0	0	0	1	0	3	3	0	0	0	1
211	1	1	1	0	1.65	70	5	2	1	2	1	0	0	0	0	0	0	0	0	0	0	0	0	0	0	0	0	1	0	5	4	0	0	0	1
212	2	1	1	0	1.6	60	4	2	1	2	0	0	0	0	0	0	0	0	0	0	0	0	0	0	0	0	0	1	0	3	3	0	0	0	0
215	1	1	1	0	1.8	70	1	2	1	2	3	1	1	0	0	3	1	1	0	1	1	0	1	2	1	3	2	1	0	6	4	1	2	1	1
216	2	1	1	0	1.6	70	0	2	5	2	5	1	4	3	9	3	2	1	1	0	NA	1	1	2	1	3	2	1	0	7	4	1	1	1	1
218	1	1	1	0	1.8	85	3	2	1	2	0	0	0	0	0	0	0	0	0	0	0	0	0	0	0	0	0	1	0	3	3	0	0	0	0
219	1	1	1	0	1.74	65	4	2	0	1	0	0	0	0	0	0	0	0	0	0	1	0	1	1	1	3	2	1	0	4	4	0	0	0	0
220	1	1	1	0	1.68	70	4	2	0	1	0	0	0	0	0	0	0	0	0	0	0	0	0	0	0	0	0	0	0	4	4	0	0	0	0
221	2	1	1	0	1.63	55	3	2	0	1	1	0	0	0	0	0	0	0	0	0	1	1	1	0	0	0	0	1	0	4	3	0	0	0	0
222	1	1	1	0	1.76	73	1	2	0	1	0	0	0	0	0	0	0	0	0	0	NA	0	NA	0	NA	0	0	0	0	4	4	0	0	0	0
223	2	1	1	0	1.6	65	0	2	0	1	1	0	0	0	0	0	0	0	0	0	NA	0	NA	0	NA	0	0	0	0	4	4	0	0	0	0
224	2	1	1	0	1.68	60	3	2	5	1	4	1	1	3	5	0	1	1	0	1	1		0	0	NA	0	0	0	0	0	0	NA	0	0	0
225	2	1	1	0	1.6	50	2	2	5	2	2	0	1	1	1	1	1	1	1	0	1	1	0	0	0	0	0	1	2	4	4	0	0	0	0
226	1	1	2	0	1.68	50	0	4	5	1	3	1	1	2	0	1	1	1	1	1	0	0	0	0	0	0	0	1	0	1	4	0	0	0	0
228	1	1	1	0	1.74	140	4	2	3	2	1	0	0	3	0	0	1	0	0	1	NA	0	0	0	1	3	2	1	0	7	4	0	0	0	0
229	2	1	1	0	1.57	51	2	2	1	2	3	1	0	0	0	0	0	1	1	1	NA	0	1	0	1	4	1	1	0	6	4	0	0	0	0
230	1	1	1	0	1.7	75	5	4	5	1	2	0	1	1	0	2	1	1	1	1	NA	0	1	1	1	3	2	1	0	5	4	0	0	0	1
231	2	1	1	0	1.6	50	2	2	5	2	2	0	1	1	0	2	1	1	1	1	NA	0	0	0	1	5	2	1	0	4	4	0	0	0	0
232	1	1	1	0	1.65	60	2	2	5	1	3	1	1	2	0	0	1	0	0	1	0	0	0	0	1	4	1	1	0	3	4	0	0	0	0
233	1	1	1	0	1.65	69	2	2	1	2	3	1	1	2	0	0	1	0	0	0	1	1	1	1	0	0	0	1	0	1	4	1	0	0	0
234	2	1	1	0	1.48	55	2	2	5	1	0	0	0	0	0	0	0	1	1	0	0	0	0	0	0	0	0	1	0	0	3	0	0	0	0
236	1	1	1	0	1.7	65	1	2	5	1	2	0	0	0	0	0	0	0	0	0	0	0	0	0	1	6	0	1	0	1	3	0	0	0	1
237	2	1	2	0	1.6	40	0	4	1	3	3	1	1	0	0	0	0	0	0	1	0	0	0	0	0	0	0	1	0	0	4	0	0	0	1
238	1	1	1	0	1.67	60	0	2	5	2	0	0	0	0	0	0	0	0	0	1	0	0	1	2	1	3	2	1	0	4	3	0	0	0	0
239	1	1	1	0	1.75	85	1	4	1	3	0	0	0	0	0	0	0	0	0	1	1	1	1	1	0	0	0	1	0	0	4	0	0	0	0
240	1	1	1	0	1.72	71	2	4	1	3	1	0	1	2	0	0	1	0	0	0	1	1	1	0	0	0	0	1	0	0	4	0	0	0	0
241	2	1	1	0	1.55	41	1	4	1	2	0	0	0	0	0	0	0	0	0	0	1	0	1	1	0	0	0	1	0	0	4	0	0	0	0
242	2	1	1	0	1.5	45	0	4	1	2	3	1	0	0	0	0	0	0	0	1	0	0	0	0	0	0	0	1	0	1	4	0	0	0	0
243	2	1	2	1	1.55	50	2	2	2	7	0	0	0	0	0	0	0	0	0	0	0	0	1	2	0	0	0	1	0	1	3	0	0	0	0
244	1	1	2	1	1.7	80	0	1	2	8	0	0	0	0	0	0	0	1	0	1	0	0	1	1	1	4	1	1	0	0	3	0	0	0	0
245	1	1	2	1	1.7	70	1	3	2	7	0	0	0	0	0	0	0	1	1	0	0	0	1	2	1	3	2	1	0	2	3	0	0	0	0
246	1	1	2	1	1.75	70	2	4	2	7	0	0	0	0	0	0	0	1	1	0	0	0	1	2	1	3	2	1	0	1	4	0	0	0	0
247	2	1	2	1	1.6	90	0	4	2	7	1	0	0	0	0	0	0	1	1	1	0	0	1	1	1	3	2	1	0	2	4	0	0	0	0
248	1	1	2	1	1.6	60	2	4	2	1	1	0	0	0	0	0	0	1	0	0	1	0	0	0	1	4	1	1	0	1	4	0	0	0	0
249	1	1	2	1	1.73	70	1	4	2	7	1	0	0	0	0	0	0	1	0	1	0	0	1	1	1	5	2	1	0	3	3	0	0	0	0
250	1	1	2	1	1.6	80	0	1	2	8	0	0	1	2	2	1	1	1	0	1	0	0	0	0	1	3	2	1	0	0	3	1	0	0	0
251	1	1	2	1	1.75	70	2	2	2	7	3	1	4	2	2	3	2	1	1	0	0	0	1	0	1	3	2	1	0	4	3	0	0	0	0
252	2	1	2	1	1.6	60	1	4	2	8	1	0	0	0	0	0	0	1	0	1	0	0	0	1	1	5	2	1	0	0	4	0	0	0	0
253	1	NA	2	1	1.75	75	2	4	2	NA	0	0	0	0	0	0	0	1	0	1	1	0	0	0	1	5	2	1	0	3	3	0	0	0	0
254	1	1	2	1	1.68	56	5	4	2	7	0	0	0	0	0	0	0	1	0	0	0	0	1	1	1	6	0	1	0	1	4	0	0	0	0
255	2	1	2	1	1.57	50	1	4	2	8	1	0	0	0	0	0	0	1	0	0	0	0	1	1	1	4	1	1	0	0	4	0	0	0	0
256	2	1	2	1	1.65	65	1	4	2	7	0	0	0	0	0	0	0	1	1	0	0	0	1	1	1	4	1	1	0	1	4	0	0	0	0
257	2	1	2	1	1.5	60	0	1	2	7	2	0	4	1	2	1	1	1	1	1	0	0	1	2	1	3	2	1	0	0	4	0	0	0	0
258	1	1	2	1	1.74	70	1	4	2	7	0	0	0	0	0	0	0	1	1	0	0	0	1	1	1	4	1	1	0	0	4	0	0	0	0
259	2	1	2	1	1.55	50	0	4	2	1	2	0	4	2	5	3	1	1	0	0	0	0	0	0	1	4	1	1	0	3	3	0	0	0	0
260	2	1	2	1	1.6	60	4	4	2	7	0	0	3	2	0	3	2	1	1	1	0	0	0	0	1	4	1	1	0	1	3	0	0	0	0
261	1	1	1	0	1.67	60	0	2	5	2	0	0	0	0	0	0	0	0	0	1	0	0	1	1	1	3	2	1	0	1	3	0	0	0	0
262	2	1	2	1	1.63	60	0	2	2	7	0	0	0	0	0	0	0	1	0	0	0	0	0	0	1	3	2	1	0	2	4	0	0	0	0
263	2	1	2	1	1.6	80	0	4	2	7	2	0	3	3	2	2	1	1	1	0	0	0	1	2	1	3	2	1	0	2	4	0	0	0	0
264	1	1	1	0	1.72	71	2	4	1	3	0	0	1	1	0	0	1	0	0	0	0	0	1	0	0	0	0	1	0	0	4	0	0	0	0
265	2	1	1	0	1.65	68	0	4	1	2	2	0	0	0	0	0	0	1	0	0	1	0	1	1	1	4	1	1	0	2	4	0	0	0	0
266	1	1	1	0	1.75	75	1	4	1	2	1	0	4	0	0	0	0	1	1	1	1	0	0	0	1	6	0	1	0	1	4	0	0	0	0
267	1	1	1	0	1.75	78	1	4	1	2	1	0	0	0	0	0	0	1	0	1	0	0	0	0	1	5	2	1	0	1	4	0	0	0	0
268	2	1	1	0	1.5	130	0	4	5	1	2	0	0	0	0	0	1	0	0	0	0	0	NA	0	NA	0	0	0	0	0	0	0	0	0	0
269	1	1	3	1	1.6	165	0	1	2	7	2	0	4	1	5	2	1	1	0	1	0	0	0	0	0	0	0	1	0	2	3	0	0	0	1
270	2	1	3	1	1.6	70	0	4	2	7	2	0	0	0	0	0	0	1	1	0	0	0	0	0	1	4	1	1	0	2	4	0	0	0	1
271	2	1	3	1	1.5	60	1	2	2	7	0	0	0	0	0	0	0	1	0	0	0	0	0	0	1	3	2	1	0	2	4	0	0	0	1
272	1	1	3	1	1.7	85	0	2	2	NA	2	0	0	0	0	0	0	1	1	0	0	0	0	0	1	3	2	1	0	1	4	0	0	0	1
273	2	1	3	1	1.55	70	0	2	2	7	0	0	0	0	0	0	0	1	1	1	0	0	0	0	1	3	2	1	0	2	3	0	0	0	1
274	1	1	3	1	1.7	75	1	4	2	7	0	0	0	0	0	0	0	0	0	1	0	0	0	0	1	3	2	1	0	1	3	0	0	0	1
275	2	1	2	0	1.52	75	0	4	1	1	3	1	3	3	4	3	2	1	1	0	0	0	0	0	1	1	2	1	0	7	4	1	2	1	1
276	2	1	1	0	1.55	60	0	4	5	1	4	1	0	0	0	0	0	0	0	1	1	1	0	0	1	6	0	1	0	10	4	0	0	0	0
277	2	1	2	0	1.5	52	1	4	1	2	0	0	0	0	0	0	0	0	0	0	0	0	1	1	1	6	0	1	0	1	4	0	0	0	0
278	2	1	1	0	1.55	38	3	2	5	2	1	0	0	0	0	0	0	1	0	0	1	1	0	0	0	0	0	1	0	7	3	0	0	0	0
279	1	1	1	0	1.76	65	5	2	5	1	2	0	0	1	0	0	1	1	1	1	0	0	1	0	1	5	2	1	0	4	4	0	0	0	0
280	2	1	1	0	1.67	70	3	2	5	1	2	0	1	3	2	0	1	0	0	1	1	1	0	0	1	6	0	1	0	7	4	0	0	0	0
281	1	1	1	0	1.67	65	1	1	0	3	0	0	0	0	0	0	0	1	0	0	0	0	0	0	1	4	1	1	0	3	3	0	0	0	0
282	2	1	1	0	1.47	62	2	2	0	3	1	0	0	0	0	0	0	1	0	0	0	0	0	0	0	0	0	1	0	3	3	0	0	0	0
283	1	1	6	0	1.7	72	0	2	5	8	0	0	0	0	0	0	1	0	0	0	0	0	0	0	0	0	0	1	0	3	3	0	0	0	0
284	2	1	2	0	1.6	80	1	4	1	1	0	0	0	0	0	0	0	0	0	0	0	0	1	1	0	0	0	1	0	0	3	0	0	0	0
285	1	1	2	1	1.7	70	1	4	2	7	1	0	0	0	0	0	0	1	0	0	0	0	1	1	0	0	0	1	0	6	3	0	0	0	0
286	2	1	2	1	1.66	70	1	1	2	7	0	0	0	0	0	0	0	1	0	0	0	0	1	1	0	0	0	1	0	1	3	0	0	0	0
287	1	1	2	1	1.6	60	1	1	2	7	0	0	0	0	0	0	0	1	0	0	0	0	1	1	1	3	2	1	0	2	4	0	0	0	0
288	1	1	2	1	1.75	70	4	2	2	7	1	0	0	0	0	0	0	1	0	1	0	0	1	1	0	0	0	1	0	4	4	0	0	0	0
289	2	1	2	1	1.67	65	1	2	2	7	0	0	0	0	0	0	0	0	0	0	0	0	0	0	0	0	0	1	0	1	3	0	0	0	0
290	2	1	2	1	1.6	70	1	4	2	7	0	0	0	0	0	0	0	1	0	0	0	0	0	0	0	0	0	1	0	1	4	0	0	0	0
291	2	1	2	1	1.65	60	1	4	2	7	1	0	0	0	0	0	0	1	0	0	0	0	0	0	0	0	0	1	0	0	4	0	0	0	0
292	2	1	2	1	1.6	65	2	4	2	7	1	0	0	0	0	0	0	1	0	0	0	0	1	1	0	0	0	1	0	1	4	0	0	0	0
293	2	1	2	1	1.6	65	1	4	2	7	1	0	0	0	0	0	0	1	1	0	0	0	0	0	1	3	2	1	0	1	4	0	0	0	0
294	2	1	2	1	1.62	60	1	1	2	7	0	0	0	0	0	0	0	0	0	0	0	0	0	0	0	0	0	1	0	2	3	0	0	0	0
295	2	1	2	1	1.6	50	0	4	2	7	1	0	0	0	0	0	0	1	1	0	0	0	0	0	1	4	1	1	0	0	4	0	0	0	0
296	2	1	2	1	1.65	70	1	4	2	7	1	0	0	0	0	0	0	1	1	0	0	0	1	1	0	0	0	1	0	3	3	0	0	0	0
297	1	1	1	1	1.65	65	1	3	2	7	2	0	0	0	0	0	0	1	1	0	0	0	0	0	0	0	0	1	0	1	2	0	0	0	0
298	2	1	2	1	1.55	60	1	4	0	7	1	0	0	0	0	0	0	1	1	0	0	0	0	0	0	0	0	1	0	1	0	0	0	0	0
299	1	1	2	1	1.65	70	1	2	2	7	1	0	0	0	0	0	0	1	1	0	0	0	0	0	1	4	1	1	0	0	4	0	0	0	0
300	1	1	2	1	1.65	50	0	1	2	7	4	1	1	3	0	1	2	1	1	1	1	1	1	1	1	3	2	1	0	3	3	0	0	0	0
301	2	1	2	1	1.65	50	1	3	2	7	4	1	3	1	0	0	1	0	0	0	0	0	0	0	0	0	0	1	0	1	1	1	1	1	0
302	2	1	2	1	1.55	60	1	3	2	7	1	0	0	0	0	0	0	0	0	0	0	0	0	0	0	0	0	1	0	1	3	0	0	0	0
303	1	1	2	1	1.72	75	1	2	2	7	2	0	4	0	0	0	0	1	1	1	0	0	0	0	1	3	2	1	0	2	4	0	0	0	0
304	1	1	2	1	1.65	60	1	2	2	7	3	1	4	0	0	0	0	0	0	1	0	0	0	0	0	0	0	1	0	3	3	0	0	0	0
305	2	1	2	1	1.55	70	1	4	2	7	1	0	0	0	0	0	0	1	1	0	0	0	1	1	1	3	2	1	0	2	4	0	0	0	0
306	1	1	2	1	1.65	55	1	2	2	7	2	0	0	0	0	0	0	0	0	0	0	0	0	0	0	0	0	1	0	1	3	0	0	0	0
307	2	1	2	1	1.6	58	0	4	2	7	1	0	0	0	0	0	0	0	0	0	0	0	1	1	0	0	0	1	0	1	3	0	0	0	0
308	2	1	2	1	1.6	60	1	4	2	7	2	0	0	0	0	0	0	0	0	0	0	0	0	0	0	0	0	1	0	1	4	0	0	0	0
309	2	1	2	1	1.62	60	1	4	2	7	2	0	0	0	0	0	0	1	1	0	0	0	0	0	0	0	0	1	0	1	3	0	0	0	0
310	2	1	2	1	1.58	55	0	4	2	7	2	0	0	0	0	0	0	1	1	0	0	0	0	0	1	3	2	1	0	0	4	0	0	0	0
311	2	1	2	1	1.6	56	1	2	2	7	2	0	0	0	0	0	0	1	1	0	0	0	0	0	0	0	0	1	0	1	3	0	0	0	0
312	2	1	2	1	1.62	65	0	4	2	7	1	0	0	0	0	0	0	1	1	0	0	0	0	0	1	4	1	1	0	1	4	0	0	0	0
313	2	1	2	1	1.62	55	1	4	2	7	2	0	0	0	0	0	0	1	1	0	0	0	0	0	0	0	0	1	0	2	1	0	0	0	0
314	1	1	2	1	1.65	70	1	4	2	7	1	0	4	0	0	0	0	1	1	0	0	0	1	0	1	3	2	1	0	1	3	0	0	0	0
315	1	1	2	1	1.73	65	1	4	2	7	1	0	0	0	0	0	0	0	0	0	0	0	0	0	0	0	0	1	0	1	4	0	0	0	0
317	1	1	2	1	1.73	65	1	4	2	7	1	0	0	0	0	0	0	1	1	0	0	0	0	0	1	3	2	1	0	6	4	0	0	0	0
318	2	1	2	1	1.6	55	4	4	2	7	0	0	0	0	0	0	0	1	0	1	0	1	0	0	0	0	0	1	0	1	4	0	0	0	0
321	1	1	2	1	1.6	70	3	2	2	7	0	0	0	0	0	0	0	0	0	0	1	0	0	0	1	6	0	1	0	1	4	0	0	0	0
322	1	1	2	1	1.67	70	0	4	2	7	0	0	0	0	0	0	0	0	0	0	0	0	0	0	1	3	2	1	0	1	4	0	0	0	0
323	1	1	2	1	1.68	60	5	2	2	7	2	0	4	3	0	2	1	1	1	0	0	0	1	1	1	4	1	1	0	2	3	0	0	0	0
324	1	1	2	1	1.68	60	3	2	2	7	2	0	3	3	0	2	1	1	1	1	0	0	1	1	1	4	1	1	0	1	4	0	0	0	0
325	1	1	2	1	1.73	60	2	4	2	7	2	0	3	3	0	2	1	0	0	0	0	0	0	0	0	0	0	1	0	5	3	0	0	0	0
326	2	1	2	1	1.6	65	0	4	2	7	2	0	4	3	0	2	1	1	1	0	0	0	1	1	0	0	0	1	0	1	3	0	0	0	0
327	1	1	2	1	1.73	70	0	4	2	7	0	0	0	0	0	0	0	1	0	0	0	0	0	0	1	4	1	1	0	2	4	0	0	0	0
328	2	1	1	1	1.5	80	0	4	2	7	4	1	4	2	0	3	2	1	1	0	0	0	1	0	0	0	0	1	0	2	4	0	0	0	0
329	1	1	2	1	1.62	55	0	4	2	7	2	0	3	3	0	3	1	1	1	1	0	0	0	0	1	5	2	1	0	1	4	0	0	0	0
330	1	1	2	1	1.65	50	1	4	2	7	3	1	3	3	0	3	1	1	1	0	0	0	1	1	1	5	2	1	0	1	3	0	0	0	0
331	2	1	2	1	1.5	50	0	4	2	7	2	0	3	2	3	3	2	0	0	0	0	0	0	0	1	3	2	1	0	2	4	0	0	0	0
332	2	1	2	1	1.59	70	0	2	2	7	2	0	3	3	1	2	1	1	1	0	0	0	1	1	1	3	2	1	0	3	4	0	0	0	0
333	1	1	2	1	1.68	80	1	2	2	7	2	0	3	3	0	2	1	1	1	0	0	0	1	1	1	3	2	1	0	2	4	0	0	0	0
334	2	1	2	1	1.65	55	2	4	2	7	2	0	4	3	0	2	1	1	1	0	0	0	1	1	1	3	2	1	0	2	4	0	0	0	0
335	2	1	2	1	1.6	70	0	4	2	7	2	0	4	3	0	3	1	1	1	0	0	0	1	1	1	3	2	1	0	1	4	0	0	0	0
336	2	1	2	1	1.65	60	3	4	2	7	2	0	2	3	0	2	1	1	0	1	0	0	1	2	1	3	2	1	0	1	4	0	0	0	0
337	2	1	2	1	1.41	42	1	4	2	7	2	0	3	3	8	2	1	1	1	0	0	0	1	1	1	4	1	1	0	3	4	0	0	0	0
338	2	1	2	1	1.55	5	0	4	2	7	4	1	4	2	4	2	2	1	1	0	0	0	1	2	1	3	2	1	0	0	4	0	0	0	0
339	2	1	2	1	1.5	70	0	4	2	7	2	0	4	3	2	3	2	1	1	0	0	0	1	1	1	4	1	1	0	1	4	0	0	0	0
340	2	1	2	1	1.5	50	0	4	2	7	2	0	4	2	5	2	2	1	1	0	0	0	1	1	0	0	0	1	0	0	3	0	0	0	0
341	1	1	2	1	1.73	70	1	2	2	7	2	0	2	3	0	2	1	1	1	0	0	0	1	2	1	3	2	1	0	1	3	0	0	0	0
342	1	1	2	1	1.75	71	1	3	2	7	2	0	0	0	0	0	0	1	1	1	1	1	0	0	1	4	1	1	0	1	3	0	0	0	0
343	1	1	2	1	1.7	65	1	4	2	7	0	0	4	0	0	0	0	1	1	0	0	0	0	0	1	3	2	1	0	3	3	0	0	0	0
344	2	1	2	1	1.5	59.5	1	4	0	7	2	0	0	0	0	0	0	1	1	0	0	0	0	0	1	3	2	1	0	3	4	0	0	0	0
345	2	1	2	1	1.68	150	0	4	2	7	1	0	0	0	0	0	0	1	1	0	0	0	0	0	1	6	0	1	0	0	4	0	0	0	0
346	1	1	2	1	1.65	70	3	4	2	7	2	0	1	2	3	0	1	0	0	1	0	0	1	2	0	0	0	1	0	0	4	0	0	0	0
347	1	1	2	1	1.75	76	3	4	2	7	3	1	3	3	3	0	1	0	0	0	0	0	1	0	0	0	0	1	0	4	3	0	0	0	0
348	2	1	1	0	1.55	57	1	2	5	2	0	0	0	0	0	0	0	0	0	0	0	0	0	0	0	0	0	1	0	3	3	0	0	0	0
350	2	1	2	1	1.6	65	0	4	2	7	2	0	0	0	0	0	0	0	0	0	0	0	1	1	0	0	0	1	0	5	4	0	0	0	0
351	2	1	2	1	1.52	50	1	4	2	7	2	0	4	0	0	0	0	1	1	0	0	0	0	0	1	5	2	1	0	1	4	0	0	0	0
352	1	1	2	1	1.75	130	1	2	2	7	1	0	0	0	0	0	0	1	1	0	0	0	1	2	1	4	1	1	0	2	4	0	0	0	0
353	2	1	2	1	1.6	120	1	4	2	7	2	0	0	0	0	0	0	0	0	1	0	0	0	0	0	0	0	1	0	1	4	0	0	0	1
354	1	NA	2	1	1.72	70	0	4	2	7	1	0	0	0	0	0	0	0	0	1	0	0	0	0	1	6	0	1	0	1	4	0	0	0	0
355	1	1	2	1	1.7	65	2	4	2	7	2	0	3	3	0	2	1	1	1	0	0	0	1	1	1	6	0	1	0	1	4	0	0	0	0
356	2	1	2	1	1.59	55	1	4	2	7	2	0	1	2	0	0	1	0	0	1	0	0	1	1	1	3	2	1	0	2	4	0	0	0	0
357	2	1	2	1	1.72	70	1	4	2	7	0	0	4	0	0	0	0	1	1	0	0	0	0	0	0	0	0	1	0	2	4	0	0	0	0
358	1	1	2	1	1.65	60	2	4	2	7	1	0	0	0	0	0	0	0	1	0	0	0	1	1	NA	0	0	1	0	1	4	0	0	0	0
359	1	1	2	1	1.7	75	3	4	2	1	0	0	0	2	0	0	1	0	0	0	0	0	1	0	0	0	0	1	0	1	4	0	0	0	0
360	2	1	2	1	1.65	80	2	4	2	7	0	0	1	2	0	0	1	0	0	0	0	0	1	0	0	0	0	1	0	1	4	0	0	0	0
361	1	1	2	1	1.65	70	3	2	2	7	0	0	0	0	0	0	0	0	0	0	0	0	0	0	0	0	0	1	0	0	4	0	0	0	0
362	2	1	2	1	1.5	50	1	2	2	7	1	0	0	0	0	0	0	1	0	0	0	0	0	0	1	6	0	1	0	0	3	0	0	0	0
363	1	1	2	1	1.69	71	2	2	2	7	1	0	0	0	0	0	0	0	0	1	0	0	1	1	1	4	1	1	0	3	4	0	0	0	0
364	2	2	2	1	1.6	150	2	2	2	7	5	1	4	2	3	0	2	0	0	0	0	0	0	0	0	0	0	1	0	2	4	0	0	0	1
365	2	1	1	0	1.58	49	3	2	1	1	3	1	0	2	0	0	1	0	0	0	1	1	1	0	0	0	0	1	0	5	3	1	2	1	0
366	1	1	1	0	1.6	65	3	2	1	1	4	1	1	2	2	1	1	0	0	1	0	0	1	2	0	0	0	1	1	7	4	1	2	1	0
368	1	1	1	0	1.7	55	3	2	1	1	5	1	3	3	3	3	2	0	0	0	1	1	1	2	0	0	0	1	1	8	4	0	0	0	1
369	2	1	1	0	1.55	58	1	4	1	2	4	1	2	3	5	2	1	0	0	1	0	0	1	2	0	0	0	1	0	9	4	0	0	0	0
370	2	1	1	0	1.56	70	1	4	5	3	1	0	0	0	0	0	0	0	0	0	0	0	NA	0	NA	0	0	0	0	0	0	NA	0	0	0
371	2	1	1	0	1.46	78	1	2	0	1	3	1	1	3	2	0	1	0	0	1	1	1	0	0	1	6	0	1	0	NA	4	0	0	0	0
372	2	1	1	0	1.7	160	1	2	5	8	2	0	0	0	0	0	0	0	0	0	0	0	0	0	0	0	0	0	0	0	3	0	0	0	0
373	1	1	1	0	1.74	72	2	2	0	1	3	1	0	2	2	0	1	0	0	1	1	1	1	1	0	0	0	1	0	7	4	0	0	0	0
374	2	1	1	0	1.48	53.9	0	2	5	1	1	0	0	0	0	0	0	0	0	1	0	0	0	0	0	0	0	1	0	4	3	0	0	0	0
375	1	1	1	0	1.7	80	2	2	1	8	0	0	0	0	0	0		0	0	0	0	0	0	0	0	0	0	1	0	3	3	0	0	0	0
376	1	1	1	0	1.7	90	4	4	1	1	1	0	0	0	0	0	0	1	1	0	0	0	1	1	0	0	0	1	0	4	3	0	0	0	0
377	2	1	1	0	1.64	63	3	4	5	1	1	0	0	0	0	0	0	0	0	0	0	0	1	0	0	0	0	1	0	5	4	0	0	0	0
378	2	1	1	0	1.62	70	1	4	1	2	0	0	1	0	1	0	1	1	0	0	1	1	0	0	0	0	0	1	0	4	4	0	0	0	0
379	1	1	1	0	1.68	72	1	2	5	1	0	0	0	0	0	0	0	0	0	0	0	0	0	0	0	0	0	1	0	3	3	0	0	0	0
380	2	1	1	0	1.58	70	2	2	5	1	1	0	0	0	0	0	1	0	0	0	0	0	0	0	0	0	0	1	0	3	3	0	0	0	0
381	2	1	2	0	1.67	73	2	4	5	2	1	0	0	0	0	0	0	0	0	0	1	1	1	1	0	0	0	1	0	0	3	0	0	0	0
382	2	1	1	0	1.6	62	0	4	1	3	0	0	0	0	0	0	0	0	0	0	0	0	1	0	1	4	1	1	0	6	4	0	0	0	0
383	1	1	2	0	1.7	60	1	2	0	2	0	0	0	0	0	0	0	0	0	0	0	0	0	0	1	6	0	1	0	0	3	0	0	0	0
384	1	1	2	0	1.84	84	3	2	0	8	0	0	0	0	0	0	0	0	0	0	0	0	0	0	0	0	0	1	0	0	3	0	0	0	0
385	2	1	2	0	1.63	69	1	2	5	8	0	0	0	0	0	0	0	1	0	0	0	0	0	0	1	6	0	1	0	1	3	0	0	0	0
386	2	1	2	0	1.58	52	0	4	5	1	0	0	0	0	0	0	0	1	0	0	0	0	0	0	0	0	0	1	0	2	4	0	0	0	0
387	2	1	2	0	1.6	75.5	0	2	5	1	3	1	1	2	2	0	1	1	0	0	0	0	1	2	0	0	0	1	0	1	3	0	0	0	0
388	1	1	2	0	1.7	56	3	2	5	2	0	0	0	0	0	0	0	0	0	0	0	0	1	1	1	6	0	1	0	1	4	0	0	0	0
389	1	1	6	1	1.65	72	2	2	2	7	3	1	2	3	0	0	1	0	0	0	0	0	1	2	0	0	0	1	0	10	3	NA	0	0	0
390	2	1	6	1	1.6	70	3	2	2	7	2	0	4	1	0	1	1	1	0	0	0	0	0	0	1	6	0	1	0	7	4	0	0	0	0
391	2	1	6	1	1.6	80	3	2	2	NA	3	1	0	0	0	0	0	1	0	1	0	0	0	0	0	0	0	1	0	5	3	0	0	0	0
392	2	1	6	1	1.63	80	2	4	2	7	1	0	0	0	0	0	0	0	0	0	1	1	1	0	0	0	0	1	0	3	3	0	0	0	0
393	2	1	6	1	1.55	72	0	4	2	7	2	0	4	3	7	0	2	1	0	0	0	0	0	0	1	6	0	1	0	4	4	1	0	0	0
394	2	NA	6	1	1.58	75	1	1	2	7	1	0	0	0	0	0	0	0	0	0	0	0	0	0	0	0	0	1	0	3	3	0	0	0	0
395	2	1	6	1	1.5	55	0	2	2	7	1	0	0	0	0	0	0	1	0	0	0	0	0	0	0	0	0	1	0	4	4	0	0	0	0
396	2	1	6	1	1.55	60	0	4	2	7	2	0	0	0	0	0	0	1	0	0	0	0	1	2	0	0	0	1	0	4	3	0	0	0	0
397	2	1	6	1	1.5	42	1	4	2	7	0	0	0	0	0	0	0	1	1	1	0	0	0	0	1	5	2	1	0	4	4	0	0	0	0
398	2	1	6	1	1.6	55	0	2	2	7	2	0	0	0	0	0	0	1	0	0	0	0	0	0	1	6	0	1	0	6	4	0	0	0	0
399	2	1	6	1	1.5	55	0	4	2	7	4	1	4	2	3	3	1	0	0	0	1	1	0	0	1	4	1	1	0	4	4	0	0	0	0
400	1	1	6	1	1.62	60	3	2	2	7	1	0	0	0	0	0	0	0	0	0	0	0	1	2	0	0	0	1	0	0	4	0	0	0	0
401	2	1	6	1	1.5	50	1	2	2	7	2	0	0	0	0	0	0	0	0	0	0	0	1	2	0	0	0	1	0	0	4	0	0	0	0
402	2	1	6	1	1.6	65	0	4	2	7	3	1	2	2	2	0	1	0	0	1	0	0	0	0	0	0	0	1	0	0	4	0	0	0	0
403	2	1	6	1	1.65	65	0	4	2	7	3	1	4	2	0	3	3	1	0	0	0	0	0	0	1	0	0	0	0	0	4	NA	0	0	0
404	2	NA	6	1	1.6	50	0	2	2	7	3	1	0	0	0	0	0	1	0	0	0	0	0	0	1	3	2	1	0	0	4	0	0	0	0
405	2	1	6	1	1.5	55	1	2	2	7	2	0	0	0	0	0	0	1	1	0	0	0	1	1	1	3	2	1	0	0	4	0	0	0	0
406	2	1	6	1	1.5	48	0	4	2	7	1	0	0	0	0	0	0	1	0	1	0	0	0	0	0	0	0	1	0	0	4	0	0	0	0
407	2	1	6	1	1.5	45	0	4	2	7	0	0	0	0	0	0	0	0	0	0	0	0	0	0	1	4	1	1	0	0	4	0	0	0	0
409	2	1	6	1	1.5	70	1	4	2	7	2	0	0	3	0	1	1	1	0	0	0	0	0	0	1	5	2	1	0	0	4	0	0	0	0
410	2	1	6	1	1.48	47	0	4	2	7	3	1	0	0	0	0	0	1	0	0	0	0	0	0	1	4	1	1	0	0	4	0	0	0	0
411	1	1	6	1	1.58	50	2	2	2	7	2	0	0	0	0	0	0	1	0	0	0	0	0	0	0	0	0	1	0	0	4	0	0	0	0
412	1	1	6	1	1.65	70	2	4	2	7	2	0	0	0	0	0	0	1	0	1	0	0	0	0	1	3	2	1	0	0	4	0	0	0	0
413	1	1	6	1	1.6	60	0	2	2	1	0	0	0	0	0	0	0	0	0	0	0	0	0	0	0	0	0	1	0	0	3	0	0	0	0
414	2	1	6	1	1.65	80	0	2	2	7	3	1	4	2	0	0	1	1	1	0	0	0	0	0	0	0	0	1	0	0	3	0	0	0	1
415	2	NA	6	1	1.6	40	0	1	2	7	2	0	0	0	0	0	0	1	0	0	0	0	0	0	1	6	0	1	0	0	4	0	0	0	0
416	2	1	6	1	1.7	80	0	2	2	7	2	0	0	0	0	0	0	1	0	0	0	0	0	0	0	0	0	1	0	0	3	0	0	0	0
417	2	1	6	1	1.55	65	0	4	2	7	3	1	0	0	0	0	0	1	0	0	0	0	0	0	0	0	0	1	0	0	4	0	0	0	0
418	2	1	6	1	1.66	55	5	4	2	7	0	0	0	0	0	0	0	1	0	0	0	0	0	0	1	4	1	1	0	0	4	0	0	0	0
419	2	1	6	1	1.65	65	2	4	2	7	2	0	0	2	0	0	1	1	1	1	0	0	0	0	1	5	2	1	0	0	4	0	0	0	0
420	2	1	6	1	1.6	55	0	4	2	7	4	1	2	2	3	1	1	1	1	0	0	0	0	0	1	1	2	1	0	0	4	NA	0	0	0
421	2	1	6	1	1.58	80	0	4	2	NA	3	1	0	0	0	0	0	1	0	0	0	0	1	0	0	0	0	1	0	0	3	0	0	0	0
422	1	1	6	1	1.7	70	2	2	2	7	3	1	0	0	0	0	0	1	0	0	0	0	0	0	1	3	2	1	0	0	4	0	0	0	0
423	2	NA	6	1	1.6	50	0	2	2	7	2	0	0	0	0	0	0	1	0	0	0	0	0	0	1	6	0	1	0	0	3	0	0	0	0
424	1	1	6	1	1.7	70	0	2	2	7	3	1	0	0	0	0	0	1	0	0	0	0	0	0	1	3	2	1	0	0	4	0	0	0	0
425	1	1	6	1	1.6	85	1	4	2	7	1	0	0	0	0	0	0	1	0	0	0	0	1	1	1	3	2	1	0	0	4	0	0	0	0
426	2	1	6	1	1.5	60	0	2	2	2	4	1	4	3	5	3	2	1	0	1	0	0	0	0	1	6	0	1	1	0	4	0	0	0	0
427	2	1	6	1	1.6	65	1	4	2	7	2	0	4	1	0	0	1	1	1	1	0	0	1	1	1	6	0	1	0	0	3	0	0	0	1
428	2	1	6	1	1.55	50	0	4	2	7	2	0	0	0	0	0	0	0	0	0	0	0	1	0	0	0	0	1	0	0	4	0	0	0	0
429	2	1	6	1	1.55	65	0	2	2	7	2	0	0	0	0	0	0	0	0	0	0	0	0	0	0	0	0	1	0	0	4	0	0	0	0
430	2	1	6	1	1.6	65	0	4	2	7	2	0	2	2	0	1	1	1	0	0	0	0	1	1	1	3	2	1	0	0	4	0	0	0	0
431	2	NA	6	1	1.5	50	0	4	2	7	3	1	0	0	0	0	0	0	0	1	0	0	0	0	1	6	0	1	0	0	2	0	0	0	0
432	1	NA	6	1	1.7	55	2	4	2	1	1	0	0	0	0	0	0	0	0	0	0	0	NA	0	NA	0	0	1	0	0	4	0	0	0	0
433	2	1	6	1	1.65	45	4	4	2	7	0	0	0	0	0	0	0	0	0	0	0	0	0	0	0	0	0	1	0	0	4	0	0	0	0
434	2	1	6	1	1.6	65	2	4	2	7	1	0	0	0	0	0	0	0	0	0	0	0	0	0	0	0	0	1	0	0	4	0	0	0	0
435	1	1	6	1	1.65	66.5	1	2	2	7	1	0	0	0	0	0	0	0	0	0	0	0	0	0	0	0	0	1	0	0	3	0	0	0	0
436	1	1	6	1	1.77	55	3	4	2	7	0	0	0	0	0	0	0	0	0		0	0	0	0	0	0	0	1	0	0	4	0	0	0	0
437	1	NA	6	1	1.7	60	1	2	2	7	0	0	0	0	0	0	0	1	1	0	0	0	0	0	1	3	2	1	0	0	4	0	0	0	0
438	1	1	6	1	1.65	80	1	2	2	7	2	0	0	0	0	0	0	0	0	0	0	0	1	0	0	0	0	1	0	0	4	0	0	0	0
439	2	1	6	1	1.54	50	0	4	2	7	1	0	0	0	0	0	0	1	0	1	0	0	1	2	1	3	2	1	0	0	4	0	0	0	0
440	2	1	6	1	1.76	80	5	2	2	7	2	0	0	0	0	0	0	0	0	1	0	0	0	0	0	0	0	1	0	0	4	0	0	0	0
441	1	1	6	1	1.7	50	2	2	2	7	3	1	0	0	0	0	0	1	0	0	0	0	0	0	1	3	2	1	0	0	4	0	0	0	0
442	2	1	6	1	1.5	68	4	2	2	7	3	1	1	2	0	0	1	0	0	0	0	0	1	0	0	0	0	1	0	0	4	0	0	0	0
443	1	1	6	1	1.6	66	3	2	2	7	1	0	0	0	0	0	0	1	1	0	1	0	0	0	1	5	2	1	0	0	4	0	0	0	0
444	1	1	6	1	1.65	72	3	4	2	7	2	0	0	0	0	0	0	1	0	0	0	0	0	0	0	0	0	1	0	0	4	0	0	0	0
445	1	1	6	1	1.74	70	2	2	2	7	3	1	0	0	0	0	0	1	0	0	0	0	0	0	1	3	2	1	0	0	4	0	0	0	0
446	2	1	6	1	1.55	55	0	2	2	7	2	0	0	0	0	0	0	1	0	0	0	0	1	1	1	3	2	1	0	0	3	0	0	0	0
447	1	1	6	1	1.75	65	3	4	2	7	0	0	0	0	0	0	0	0	0	0	0	0	0	0	0	0	0	1	0	0	4	0	0	0	0
448	2	NA	6	1	1.6	72	0	4	2	7	1	0	0	0	0	0	0	0	0	0	0	0	1	0	0	0	0	1	0	0	3	0	0	0	0
449	2	1	6	1	1.56	75	2	2	2	7	3	1	0	3	8	0	1	1	0	0	0	0	1	0	0	0	0	1	0	0	3	0	0	0	0
450	2	1	6	1	1.6	80	0	4	2	7	2	0	1	1	3	0	1	1	0	1	0	0	0	0	1	3	2	1	0	0	4	0	0	0	0
451	2	NA	6	1	1.59	52	3	4	2	7	0	0	0	0	0	0	0	0	0	0	0	0	0	0	0	0	0	1	0	0	4	0	0	0	0
452	2	1	6	1	1.6	55	0	4	2	7	2	0	0	0	0	0	0	1	0	0	1	1	1	2	0	0	0	1	0	0	4	0	0	0	0
453	1	1	6	1	1.68	60	NA	NA	2	7	3	1	1	2	0	0	1	0	0	0	0	0	0	0	0	0	0	1	0	0	4	0	0	0	0
454	2	NA	NA	0	1.6	70	NA	NA	NA	NA	3	1	1	2	0	0	1	1	0	0	0	0	0	0	1	5	2	1	0	0	3	NA	0	0	0
455	2	1	1	0	1.6	116	0	4	5	3	3	1	4	0	0	0	0	0	0	0	0	0	NA	0	NA	0	0	0	0	0	0	NA	0	0	0
456	2	NA	NA	0	1.67	67	NA	NA	NA	NA	1	0	0	0	0	0	0	0	0	0	0	0	NA	0	NA	0	0	0	0	0	0	NA	0	0	0
457	2	1	1	0	1.6	60	2	2	1	1	2	0	0	0	0	0	0	1	0	0	0	0	NA	0	NA	0	0	0	0	0	0	0	0	0	0
458	1	NA	NA	0	1.71	80	NA	NA	NA	NA	3	1	0	0	0	0	0	0	0	0	0	0	NA	0	NA	0	0	0	0	0	0	0	0	0	0
459	2	NA	NA	0	1.5	49	NA	NA	NA	NA	1	0	0	0	0	0	0	0	0	0	0	0	NA	0	NA	0	0	0	0	0	0	0	0	0	0
460	2	NA	NA	0	1.57	51	NA	NA	NA	NA	2	0	0	0	0	0	0	0	0	0	0	0	NA	0	NA	0	0	0	0	0	0	0	0	0	0
461	2	NA	NA	0	1.62		NA	NA	NA	NA	2	0	4	1	0	3	0	0	0	0	0	0	NA	0	NA	0	0	0	0	0	0	NA	0	0	0
462	1	NA	NA	0	1.74	85	NA	NA	NA	NA	0	0	4	0	0	0	0	0	0	0	0	0	NA	0	NA	0	0	0	0	0	0	0	0	0	0
463	1	NA	NA	0	1.72	60	NA	NA	NA	NA	1	0	0	0	0	0	0	0	0	0	0	0	NA	0	NA	0	0	0	0	0	0	0	0	0	0
464	1	NA	NA	0	1.65	50	NA	NA	NA	NA	2	0	2	0	0	0	0	0	0	0	0	0	NA	0	NA	0	0	0	0	0	0	NA	0	0	0
465	1	NA	NA	0	1.74		NA	NA	NA	NA	3	1	4	0	0	0	0	0	0	0	0	0	NA	0	NA	0	0	0	0	0	0	NA	0	0	0
466	1	NA	NA	0	1.55		NA	NA	NA	NA	3	1	4	0	0	0	0	0	0	0	0	0	NA	0	NA	0	0	0	0	0	0	NA	0	0	0
467	1	NA	NA	0	1.75	70	NA	NA	NA	NA	3	1	4	0	0	0	0	0	0	0	0	0	NA	0	NA	0	0	0	0	0	0	NA	0	0	0
468	1	NA	NA	0	1.75	80	NA	NA	NA	NA	0	0	0	0	0	0	0	0	0	0	0	0	NA	0	NA	0	0	0	0	0	0	0	0	0	0
469	1	NA	NA	0	1.75	62	NA	NA	NA	NA	1	0	0	0	0	0	0	0	0	0	0	0	NA	0	NA	0	0	0	0	0	0	0	0	0	0
470	1	NA	NA	0	1.7	70	NA	NA	NA	NA	1	0	0	0	0	0	0	0	0	0	0	0	NA	0	NA	0	0	0	0	0	0	0	0	0	0
471	1	NA	NA	0	1.8	90	NA	NA	NA	NA	2	0	4	0	0	0	0	0	0	0	0	0	NA	0	NA	0	0	0	0	0	0	NA	0	0	0
472	1	NA	NA	0	1.75		NA	NA	NA	NA	2	0	4	0	0	0	0	0	0	0	0	0	NA	0	NA	0	0	0	0	0	0	NA	0	0	0
473	1	NA	NA	0	1.73	57	NA	NA	NA	NA	0	0	0	0	0	0	0	0	0	0	0	0	NA	0	NA	0	0	0	0	0	0	0	0	0	0
474	1	1	2	0	1.7	75	2	2	1	2	1	0	0	0	0	0	0	0	0	0	1	1	0	0	0	0	0	1	0	4	4	0	0	0	0
475	1	NA	NA	0	1.65		NA	NA	NA	NA	3	1	4	0	0	0	0	0	0	0	0	0	NA	0	NA	0	0	0	0	0	0	NA	0	0	0
476	2	NA	NA	0	1.65	70	NA	NA	NA	NA	1	0	0	0	0	0	0	0	0	0	0	0	NA	0	NA	0	0	0	0	0	0	0	0	0	0
478	1	NA	NA	0	1.73	70	NA	NA	NA	NA	0	0	0	0	0	0	0	0	0	0	0	0	NA	0	NA	0	0	1	0	0	0	0	0	0	0
479	1	NA	NA	0	1.66	90	NA	NA	NA	NA	1	0	0	0	0	0	0	0	0	0	0	0	NA	0	NA	0	0	0	0	0	0	0	0	0	0
480	2	NA	NA	0	1.53	41	NA	NA	NA	NA	0	0	0	0	0	0	0	0	0	0	0	0	NA	0	NA	0	0	0	0	0	0	0	0	0	0
481	2	1	1	0	1.5	46	0	4	1	1	3	1	1	3	2	0	1	1	1	1	1	1	1	1	1	6	0	0	0	2	4	0	0	0	0
482	2	1	1	0	1.6	55	4	4	1	2	2	0	4	0	0	0	0	0	0	0	0	0	0	0	0	0	0	0	0	0	4	0	0	0	0
483	2	NA	6	0	1.6	60	0	2	5	1	2	0	0	0	0	0	0	1	1	0	0	0	0	0	1	6	0	0	0	0	4	0	0	0	0
484	1	NA	6	0	1.7	65	1	1	1	NA	3	1	2	3	0	0	2	1	0	0	0	0	1	2	1	3	2	0	0	6	4	0	0	0	1
485	1	1	1	0	1.72	75	3	2	0	8	1	0	0	0	0	0	0	1	0		0	0	0	0	0	0	0	0	0	0	3	0	0	0	0
486	1	NA	6	0	1.72	70	1	2	5	1	1	0	0	0	0	0	0	0	0	1	0	0	0	0	0	0	0	0	0	0	3	0	0	0	0
487	2	1	1	0	1.53	41	0	2	5	2	3	1	1	2	1	0	1	0	0	0	0	0	0	0	1	6	0	0	0	1	2	0	0	0	1
488	2	1	1	0	1.45	54	1	2	0	8	1	0	0	0	0	0	0	1	1	0	0	0	NA	0	0	0	0	0	0	3	3	0	0	0	0
489	2	1	1	0	1.7	90	0	2	0	2	1	0	0	0	0	0	0	1	1	0	0	0	0	0	0	0	0	0	0	1	4	0	0	0	0
490	1	1	1	0	1.65	70	0	4	5	1	0	0	0	0	0	0	0	0	0	0	0	0	NA	0	NA	0	0	0	0	0	3	0	0	0	0
491	2	1	2	0	1.64	60	2	3	5	2	1	0	0	0	0	0	0	0	0	0	0	0	1	1	0	0	0	1	0	0	3	0	0	0	0
492	1	1	6	1	1.75	100	2	4	2	7	1	0	0	0	0	0	0	1	1	1	0	0	1	1	1	3	2	1	0	7	4	0	0	0	0
493	1	1	1	0	1.75	90	3	2	0	8	5	1	3	3	3	0	0	1	0	0	0	0	1	1	1	4	1	1	0	3	4	0	0	0	0
494	2	1	6	0	1.57	65	2	2	5	2	1	0	0	0	0	0	0	0	0	1	1	1	0	0	0	0	0	1	0	1	3	0	0	0	0
495	1	1	6	0	1.72	75	1	2	1	1	1	0	0	0	0	0	0	0	0	0	0	0	0	0	0	0	0	1	0	1	2	0	0	0	0
496	1	1	1	0	1.68	61.5	4	4	0	8	2	0	1	3	5	0	1	1	1	0	0	0	1	1	1	3	2	1	0	2	4	1	1	1	0
497	2	1	6	0	1.55	56	0	2	0	1	0	0	0	0	0	0	0	1	1	0	0	0	0	0	0	0	0	1	0	1	3	0	0	0	1
498	1	1	1	0	1.65	70	1	2	0	8	4	1	3	3	0	2	1	1	1	0	0	0	1	2	1	3	2	1	0	3	4	0	0	0	1
499	2	1	3	0	1.55	80	0	2	0	2	1	0	0	0	0	0	0	1	1	0	0	0	0	0	0	0	0	1	0	1	3	0	0	0	1
500	1	1	1	0	1.65	65	5	4	0	1	3	1	4	0	0	0	0	1	1	1	0	0	0	0	0	0	0	1	0	4	4	0	0	0	1
501	1	1	1	0	1.7	90	3	4	0	1	4	1	1	3	0	0	1	0	0	1	1	1	0	0	0	0	0	1	0	2	4	0	0	0	1
502	2	1	1	0	1.6	68	1	4	1	1	2	0	0	0	0	0	0	1	0	0	0	0	1	0	0	0	0	1	0	2	3	0	0	0	1
503	1	1	1	0	1.8	90	1	4	1	1	2	0	0	2	0	3	1	1	1	0	0	0	0	0	0	0	0	1	0	1	3	1	1	1	1
505	2	1	1	0	1.45	44	1	2	5	2	0	0	0	0	0	0	0	0	0	0	0	0	1	1	0	0	0	1	0	1	4	0	0	0	1
506	2	1	1	0	1.5	64	0	2	5	2	0	0	0	0	0	0	0	0	0	0	0	0	1	1	1	3	2	1	0	2	4	0	0	0	1
507	2	1	1	0	1.5	70	0	2	0	2	0	0	0	0	0	0	0	0	0	0	0	0	1	1	0	0	0	1	0	1	4	0	0	0	1
508	2	1	1	0	1.4	59	0	2	5	1	2	0	2	3	3	3	1	0	0	0	1	0	1	1	0	0	0	1	0	1	4	0	0	0	1
509	2	1	1	0	1.48	71	2	2	0	8	1	0	0	0	0	0	0	0	0	0	0	0	1	1	0	0	0	1	0	1	3	0	0	0	1
510	2	1	1	0	1.53	41	0	2	5	2	1	0	0	0	0	0	0	0	0	0	1	1	1	1	0	0	0	1	0	1	3	0	0	0	1
511	2	1	3	0	1.55	46	0	2	5	1	1	0	0	0	0	0	0	0	0	0	1	1	1	1	0	0	0	1	0	1	3	0	0	0	1
512	2	1	1	0	1.6	61	0	2	1	2	1	0	0	0	0	0	0	0	0	0	0	0	1	1	0	0	0	1	0	1	4	0	0	0	1
513	1	1	6	0	1.76	60	0	2	5	1	4	1	1	3	4	3	1	0	0	1	1	1	0	0	0	0	0	1	0	1	3	0	0	0	1
514	2	1	1	0	1.65	85	3	2	0	8	0	0	0	0	0	0	0	0	0	0	1	0	1	1	0	0	0	1	0	1	3	0	0	0	1
515	2	1	6	0	1.58	40	0	2	0	8	1	0	0	0	0	0	0	0	0	0	1	1	1	1	0	0	0	1	0	2	3	0	0	0	1
516	1	1	1	0	1.68	65	1	2	5	1	0	0	0	0	0	0	0	0	0	0	0	0	1	1	0	0	0	1	0	2	3	0	0	0	1
517	1	1	6	0	1.58	55	2	4	2	1	4	1	3	3	0	3	1	1	1	0	0	0	0	0	1	4	1	1	0	2	4	0	0	0	1
518	1	1	4	0	1.55	70	3	2	0	8	1	0	0	0	0	0	0	0	0	0	1	0	1	1	0	0	0	1	0	2	4	0	0	0	1
519	2	1	3	0	1.59	72.5	1	2	5	2	1	0	0	0	0	0	0	0	0	0	1	0	1	1	0	0	0	1	0	1	3	0	0	0	1
520	2	1	2	0	1.58	60	1	4	1	2	3	1	0	3	5	0	1	0	0	1	0	0	0	0	0	0	0	1	0	6	3	0	0	0	1
521	2	1	6	0	1.56	56	1	2	1	1	2	0	0	1	3	0	1	0	0	0	1	0	1	1	0	0	0	1	0	1	3	0	0	0	1
522	2	1	2	0	1.58	60	0	2	5	1	0	0	0	0	0	0	0	0	0	0	0	0	1	1	0	0	0	1	0	6	3	0	0	0	1
523	2	1	6	0	1.5	61	1	4	5	1	1	0	0	0	0	0	0	0	0	0	1	0	1	0	0	0	0	1	0	4	4	0	0	0	1
524	2	1	6	0	1.58	50	1	4	5	8	4	1	3	3	0	3	1	1	0	0	0	0	0	0	0	0	0	1	0	1	4	0	0	0	0
525	2	1	6	0	1.6	65	2	2	1	8	0	0	0	0	0	0	0	0	0	0	0	0	0	0	0	0	0	1	0	1	3	0	0	0	0
526	1	1	6	0	1.68	70	2	2	1	8	0	0	0	0	0	0	0	0	0	0	0	0	0	0	0	0	0	1	0	1	3	0	0	0	0
527	2	1	2	0	1.62	65	1	4	5	8	2	0	4	2	0	3	1	1	1	0	0	0	1	1	1	6	0	1	0	1	4	0	0	0	0
528	2	1	2	0	1.6	55	0	4	5	1	2	0	1	2	0	0	1	1	1	0	0	0	0	0	0	0	0	1	0	1	4	0	0	0	0
529	2	1	2	0	1.64	66	0	4	5	8	1	0	0	0	0	0		1	1	1	0	0	0	0	0	0	0	1	0	2	4	0	0	0	0
530	2	1	2	0	1.67	60	0	2	0	1	0	0	0	0	0	0	0	1	1	0	0	0	0	0	1	3	2	1	0	1	4	0	0	0	0
531	1	1	2	0	1.69	75	1	2	1	1	1	0	0	0	0	0	0	0	0	0	1	1	1	1	0	0	0	1	0	1	4	0	0	0	0
532	2	1	2	0	1.59	41	0	4	1	1	0	0	0	0	0	0	0	1	0	1	0	0	1	0	1	4	1	1	0	2	4	0	0	0	0
533	2	1	2	0	1.6	60	1	2	1	8	0	0	0	0	0	0	0	0	0	0	0	0	1	1	0	0	0	1	0	1	3	0	0	0	0
534	1	1	2	0	1.75	92.5	3	2	1	8	0	0	0	0	0	0	0	0	0	0	0	0	1	1	0	0	0	1	0	1	3	0	0	0	0
535	1	1	1	0	1.6	70	1	2	5	3	1	0	0	0	0	0	0	1	0	0	0	0	0	0	0	0	0	1	0	2	3	0	0	0	0
536	1	1	6	0	1.65	45	1	4	5	1	2	0	1	2	0	1	1	0	0	1	0	0	0	0	0	0	0	1	0	1	4	0	0	0	0
537	2	1	6	0	1.63	85	2	2	1	8	1	0	0	0	0	0	0	0	0	0	1	1	0	0	0	0	0	1	0	2	2	0	0	0	0
538	2	1	1	0	1.47	45	4	4	1	1	1	0	0	0	0	0	0	0	0	0	0	0	1	1	1	3	2	1	0	0	4	0	0	0	0
539	2	1	6	0	1.62	75	1	2	1	8	3	1	2	3	0	2	1	1	1	0	0	0	0	0	1	3	2	1	0	3	3	0	0	0	0
540	2	1	6	0	1.5	40	1	2	5	1	3	1	1	2	0	1	1	0	0	0	1	1	0	0	0	0	0	1	0	2	3	0	0	0	0
542	1	1	6	0	1.69	65	1	2	1	1	0	0	0	0	0	0	0	0	0	0	0	0	0	0	0	0	0	1	0	0	2	0	0	0	0
543	2	1	6	0	1.58	55	0	2	1	1	2	0	0	1	0	1	1	0	0	0	1	1	0	0	0	0	0	1	0	1	2	0	0	0	0
544	2	1	6	0	1.6	50	2	2	5	8	4	1	2	3	2	2	1	0	0	1	1	1	0	0	0	0	0	1	0	7	3	0	0	0	0
545	1	1	6	0	1.78	70	2	2	5	8	0	0	0	0	0	0	0	0	0	0	0	0	0	0	0	0	0	1	0	1	3	0	0	0	0
546	2	1	6	0	1.6	65	1	2	5	3	2	0	1	2	0	1	1	0	0	1	0	0	0	0	0	0	0	1	0	0	4	0	0	0	0
547	2	1	6	0	1.6	55	1	4	5	2	3	1	1	3	0	1	1	0	0	1	1	1	0	0	1	4	1	1	0	1	4	0	0	0	0
548	2	1	1	0	1.6	70	0	4	1	2	4	1	0	0	0	0	0	1	1	0	0	0	1	1	0	0	0	1	0	2	4	0	0	0	1
549	2	1	1	0	1.8	65	3	2	0	2	1	0	0	0	0	0	0	0	0	0	1	1	1	0	0	0	0	1	0	0	4	0	0	0	0
550	2	1	1	0	1.55	56	3	2	0	2	3	1	0	0	0	0	0	0	0	0	0	0	0	0	0	0	0	1	0	0	4	0	0	0	0
552	2	1	2	0	1.63	52	3	4	1	1	0	0	0	0	0	0	0	1	1	0	1	1	0	0	1	3	2	1	0	2	4	0	0	0	0
554	2	1	4	0	1.5	60	3	4	1	1	2	0	0	0	0	0	0	0	0	1	0	0	0	0	0	0	0	1	1	0	3	0	0	0	1

## Sheet: 4
SEQN	Gender	EthnicitEthnicity	RA	Nursing home	Height	Weight	Education	Marital status	WLT	RBGE	FRAIL	FRAIL level	ADL	VAS	SPF	EQ-5D	CIS	MMSE	SPPB	MS	MNA.SF	VS	VA	HS	HISS	HIL	Depression	SAS	Comorbidity	Age index	Social support	Abuse score	Abuse risk	Caregiver supp.I
3	2	1	2	1	1.6	65	1	2	2	7	2	0	3	0	2	1	1	1	1	0	0	0	0	0	0	0	1	0	2	3	0	0	0	0
15	1	1	3	1	1.8	75	2	4	2	NA	4	1	2	0	1	1	1	0	0	0	0	0	0	0	0	0	1	0	4	4	0	0	0	1
17	2	1	3	1	1.64	60	2	4	2	7	3	1	4	0	2	1	1	1	0	0	0	0	0	0	0	0	1	2	1	3	0	0	0	1
18	2	1	3	1	1.55	56	0	4	2	7	1	0	0	0	0	0	1	1	0	0	0	0	0	0	0	0	1	0	0	4	0	0	0	1
19	2	1	3	1	1.6	60	0	4	2	7	2	0	4	0	2	1	1	1	0	0	0	0	0	0	0	0	1	0	1	4	0	0	0	1
20	1	1	3	1	1.7	61	2	2	2	7	3	1	2	0	1	1	1	1	0	1	1	0	0	0	0	0	1	0	1	4	0	0	0	1
21	2	1	3	1	1.58	65	0	2	2	NA	3	1	2	6	1	1	1	1	0	0	0	0	0	1	3	2	1	0	1	4	0	0	0	1
22	1	1	3	1	1.7	55	0	4	2	7	1	0	0	0	0	0	1	0	1	0	0	0	0	1	3	2	1	0	2	4	0	0	0	1
23	2	1	3	1	1.58	62	0	4	2	7	2	0	2	5	3	1	1	1	0	0	0	0	0	0	0	0	1	0	1	3	0	0	0	1
26	1	1	6	1	1.6	70	0	1	2	7	1	0	4	0	0	0	1	1	0	0	0	0	0	1	6	0	1	0	2	3	0	0	0	1
27	1	1	6	1	1.65	60	0	1	2	7	0	0	4	0	0	0	0	0	0	0	0	0	0	0	0	0	1	0	3	3	0	0	0	1
28	1	1	6	1	1.75	65	1	1	2	7	0	0	4	0	0	0	1	1	0	0	0	0	0	0	0	0	1	0	3	3	0	0	0	1
29	1	1	6	1	1.6	80	0	1	2	7	1	0	4	0	0	0	0	0	0	0	0	NA	0	0	0	0	1	0	4	4	0	0	0	1
30	1	1	6	1	1.5	60	0	1	2	7	1	0	4	0	0	0	1	1	0	0	0	1	0	1	3	2	1	0	3	3	0	0	0	1
31	1	NA	6	1	1.65	70	1	1	2	7	2	0	0	0	0	0	1	1	1	0	0	1	0	1	6	0	1	0	5	4	0	0	0	1
32	1	1	6	1	1.71	73	2	1	2	7	0	0	0	0	0	0	1	0	0	0	0	1	1	1	3	2	1	0	4	3	0	0	0	1
33	1	1	6	1	1.7	80	0	1	2	7	2	0	0	0	0	0	1	1	0	1	1	0	0	1	3	2	1	0	10	3	0	0	0	1
34	1	1	6	1	1.6	57.5	0	1	2	7	2	0	0	2	0	1	0	0	0	0	0	1	0	0	0	0	1	0	3	3	0	0	0	1
35	1	1	6	1	1.65	60	0	1	2	7	3	1	0	0	0	0	1	0	1	0	0	0	0	1	4	1	1	0	5	3	0	0	0	1
36	1	1	6	1	1.6	65	0	1	2	7	2	0	1	0	2	1	1	0	0	1	1	1	2	1	6	0	1	0	4	3	0	0	0	1
37	2	1	1	0	1.49	61	3	2	1	1	0	0	0	0	0	0	1	0	0	0	0	0	0	0	0	0	1	0	6	4	0	0	0	1
38	2	1	1	0	1.56	73	4	2	1	1	0	0	0	0	0	0	1	1	0	0	0	NA	0	NA	0	0	1	0	4	3	0	0	0	1
39	1	1	1	0	1.8	95	2	2	5	3	2	0	0	0	0	1	0	0	0	0	0	1	1	0	0	0	1	0	0	3	NA	0	0	1
40	1	1	1	0	1.73	62	3	2	1	1	1	0	0	0	0	1	0	0	0	0	0	1	2	1	3	2	1	0	3	3	0	0	0	1
41	2	1	1	0	1.6	55	0	4	1	5	2	0	0	2	2	1	0	0	0	0	0	1	2	1	4	1	1	0	7	3	0	0	0	1
42	2	1	1	0	1.58	51	3	2	1	2	0	0	0	0	0	0	1	0	1	0	0	1	2	1	4	1	1	0	5	4	0	0	0	1
43	1	1	1	0	1.72	51	5	2	1	2	0	0	0	0	0	0	0	0	0	1	1	1	0	1	6	0	1	0	5	4	0	0	0	1
44	2	1	1	0	1.58	70	1	2	1	2	1	0	0	0	0	0	1	1	1	0	0	1	2	NA	0	0	1	0	6	3	0	0	0	1
45	1	1	1	0	1.63	80	2	2	1	2	0	0	0	0	0	0	0	0	0	0	0	1	1	1	4	1	1	0	4	3	0	0	0	1
46	2	1	1	0	1.47	60	1	4	5	2	2	0	0	2	0	1	1	0	0	0	0	1	1	1	3	2	1	0	6	4	0	0	0	1
47	2	1	1	0	1.66	75	0	2	5	3	1	0	0	0	0	0	0	0	0	0	0	0	0	0	0	0	0	0	0	3	0	0	0	1
48	1	1	1	0	1.66	135	5	4	5	2	3	1	1	8	0	1	0	0	0	0	0	1	2	0	0	0	1	0	7	4	0	0	0	1
49	1	1	1	0	1.6	65	4	2	1	1	0	0	0	0	0	0	0	0	0	0	0	0	0	NA	0	0	1	0	7	4	0	0	0	1
50	2	1	1	0	1.65	75	1	4	5	2	2	0	0	0	0	1	0	0	1	0	0	0	0	0	0	0	1	0	1	3	1	3	1	1
51	2	1	1	0	1.55	67	3	2	1	1	1	0	0	0	0	0	1	0	0	0	0	1	1	1	5	2	1	1	4	4	0	0	0	1
52	1	1	1	0	1.7	65	5	2	1	1	0	0	0	0	0	0	1	0	0	0	0	0	0	1	3	2	1	1	4	4	0	0	0	1
55	1	1	1	0	1.69	64.9	2	2	0	8	1	0	0	0	0	0	0	0	0	1	0	1	0	0	0	0	1	0	1	3	0	0	0	1
57	2	1	1	0	1.57	70.3	2	4	1	2	2	0	0	1	0	1	0	0	0	0	0	0	0	0	0	0	1	0	1	3	0	0	0	1
58	1	1	1	0	1.73	61.3	2	2	5	2	0	0	0	0	0	0	0	0	0	0	0	0	0	0	0	0	1	0	0	4	0	0	0	1
59	1	1	1	0	1.5	62.2	1	4	1	2	3	1	0	0	0	0	1	1	1	0	0	0	0	1	3	2	1	0	0	3	0	0	0	1
60	2	1	1	0	1.59	67	2	2	0	2	1	0	0	0	0	0	0	0	0	0	0	0	0	0	0	0	1	0	0	3	0	0	0	1
61	1	1	1	0	1.7	71	1	2	0	2	0	0	0	0	0	0	0	0	0	0	0	0	0	0	0	0	1	0	0	3	0	0	0	1
62	1	1	6	0	1.65	75	0	1	2	7	3	1	0	0	0	0	0	0	0	0	0	0	0	0	0	0	1	0	3	3	0	0	0	1
63	1	1	1	0	1.65	65	0	2	0	8	0	0	0	0	0	0	0	0	1	0	0	0	0	0	0	0	1	0	0	3	0	0	0	1
64	1	1	6	0	1.7	73	0	1	2	7	3	1	4	3	0	1	0	0	0	1	1	0	0	0	0	0	1	0	3	3	0	0	0	1
66	1	1	1	0	1.66	70	3	4	1	1	1	0	0	0	0	0	0	0	0	0	0	0	0	0	0	0	1	0	0	4	0	0	0	1
67	2	1	1	0	1.6	56	0	4	1	2	2	0	0	0	0	0	1	1	0	0	0	0	0	1	6	0	1	0	1	4	0	0	0	1
68	1	1	3	0	1.67	60	2	2	5	1	0	0	0	0	0	0	0	0	1	1	1	0	0	0	0	0	1	0	0	3	0	0	0	1
69	1	1	1	0	1.7	70	2	2	5	1	2	0	1	0	3	1	0	0	1	0	0	0	0	0	0	0	1	0	1	4	0	0	0	1
70	2	1	1	0	1.68	60	3	4	1	1	0	0	0	0	0	1	0	0	0	0	0	0	0	0	0	0	1	0	0	4	1	0	0	1
71	2	1	1	0	1.5	65	2	2	5	1	1	0	0	0	0	0	0	0	1	0	0	1	1	0	0	0	1	0	0	3	0	0	0	1
72	2	1	1	0	1.55	60	0	4	5	2	0	0	0	0	0	0	0	0	0	0	0	0	0	0	0	0	1	0	0	4	0	0	0	1
73	2	1	2	0	1.6	60	0	4	5	2	1	0	0	0	0	0	0	0	0	1	1	0	0	1	5	2	1	0	0	4	0	0	0	0
75	1	NA	1	0	1.68	67	3	2	5	8	0	0	0	0	0	0	0	0	0	0	0	0	0	0	0	0	1	0	0	4	0	0	0	0
76	2	1	1	0	1.52	64	1	2	5	8	0	0	0	0	0	0	0	0	0	0	0	0	0	0	0	0	1	0	0	3	0	0	0	0
77	1	1	1	0	1.47	60	1	2	0	8	0	0	0	0	0	0	0	0	0	0	0	0	0	0	0	0	1	0	0	3	0	0	0	0
78	1	1	1	0	1.76	60	3	2	0	8	0	0	0	0	0	0	0	0	0	1	0	0	0	0	0	0	1	0	0	4	0	0	0	0
79	1	1	1	0	1.62	74.3	1	2	0	8	0	0	0	0	0	0	0	0	0	0	0	0	0	0	0	0	1	0	1	3	0	0	0	1
80	2	1	1	0	1.55	120	2	4	5	2	0	0	0	0	0	0	0	0	1	1	1	0	0	0	0	0	1	0	0	4	0	0	0	0
81	2	1	1	0	1.55	70.8	1	2	0	5	0	0	0	0	0	0	0	0	0	0	0	0	0	0	0	0	1	0	0	4	0	0	0	1
82	2	1	1	0	1.6	50	0	2	0	3	2	0	0	0	0	0	1	0	0	0	0	1	0	0	0	0	1	0	2	4	0	0	0	0
83	1	1	1	0	1.6	65	3	2	0	3	0	0	0	0	0	0	0	0	0	0	0	0	0	0	0	0	1	0	1	4	0	0	0	0
84	2	1	1	0	1.53	57.3	0	4	5	1	0	0	0	0	0	0	0	0	0	0	0	0	0	0	0	0	1	0	1	4	0	0	0	1
85	1	1	3	0	1.75	80	2	4	1	3	0	0		0	0	0	0	0	1	0	0	1	0	1	5	2	1	0	1	4	0	0	0	0
88	2	1	3	0	1.6	50	0	4	5	1	2	0	1	1	2	1	1	1	1	1	1	1	2	1	4	1	1	0	1	3	0	0	0	1
89	2	1	1	0	1.57	65	1	2	5	3	2	0	0	5	0	1	1	1	0	0	0	1	1	0	0	0	1	0	4	3	0	0	0	0
90	1	1	1	0	1.65	63	1	2	5	3	4	1	1	2	0	1	1	0	0	0	0	1	1	0	0	0	1	0	5	4	0	0	0	0
91	2	1	1	0	1.6	58	4	4	1	2	3	1	0	0	0	0	1	1	0	1	1	1	1	1	3	2	1	0	4	4	0	0	0	0
92	1	1	1	0	1.7	82	3	3	1	2	0	0	0	0	0	0	0	0	0	0	0	0	0	0	0	0	1	0	2	3	0	0	0	0
93	2	2	1	0	1.56	57	2	4	1	2	0	0	0	0	0	0	0	0	0	1	1	0	0	0	0	0	1	0	0	4	0	0	0	0
94	1	1	1	0	1.56	115	2	2	5	3	3	1	1	3	0	1	0	0	1	1	1	1	1	1	4	1	1	0	0	4	0	0	0	1
95	1	1	1	0	1.67	90	2	2	0	2	0	0	0	0	0	0	0	0	1	0	0	0	0	0	0	0	1	0	0	3	0	0	0	1
96	2	1	1	0	1.42	39.5	1	2	0	2	0	0	0	0	0	0	0	0	1	0	0	0	0	0	0	0	1	0	0	3	0	0	0	0
97	1	1	1	0	1.65	96.2	3	2	0	1	1	0	0	0	0	0	0	0	0	0	0	0	0	0	0	0	1	0	0	3	0	0	0	1
98	2	1	1	0	1.52	62.3	2	2	0	1	3	1	4	3	3	2	1	0	1	0	0	0	0	1	6	0	1	0	2	3	0	0	0	1
99	2	1	1	0	1.6	50	3	2	0	1	0	0	0	0	0	0	0	0	0	0	0	1	1	0	0	0	1	0	0	0	0	0	0	0
101	1	1	1	0	1.7	80	2	2	1	1	1	0	0	0	0	0	1	0	0	0	0	0	0	0	0	0	1	0	0	3	0	0	0	0
102	1	1	1	0	1.68	70	2	2	3	1	5	1	0	5	3	2	1	1	0	1	1	0	0	0	0	0	1	0	1	4	0	0	0	1
103	2	1	1	0	1.55	75	1	2	1	NA	0	0	0	0	0	0	0	0	0	0	0	0	0	0	0	0	1	0	0	3	0	0	0	0
104	2	1	3	0	1.52	44	1	2	0	2	1	0	0	0	0	1	0	0	0	0	0	0	0	1	3	2	1	0	1	3	0	0	0	0
105	2	1	1	0	1.62	75	1	2	5	1	4	1	2	0	0	1	0	0	1	1	1	0	0	0	0	0	1	0	0	3	0	0	0	0
106	1	1	3	1	1.63	60	1	4	2	7	3	1	1	0	0	1	1	0	0	1	1	0	0	1	6	0	1	0	2	3	0	0	0	1
107	1	1	3	1	1.72	70	1	4	2	NA	2	0	0	0	0	0	1	1	0	1	1	0	0	1	6	0	1	0	0	4	0	0	0	1
108	1	1	3	1	1.6	60	0	4	2	7	1	0	0	0	0	0	1	0	1	0	0	0	0	1	4	1	1	0	2	3	0	0	0	1
109	1	1	3	1	1.7	70	1	4	2	7	0	0	0	0	0	0	1	0	1	0	0	0	0	1	4	1	1	0	0	4	0	0	0	0
110	1	1	1	0	1.7	65	5	2	0	8	0	0	0	0	0	0	0	0	0	0	0	0	0	0	0	0	1	0	0	4	0	0	0	0
111	1	1	1	0	1.6	60	2	2	5	1	1	0	0	0	0	0	0	0	0	1	1	0	0	0	0	0	1	0	2	4	0	0	0	0
112	2	1	1	0	1.53	60	2	2	0	8	1	0	0	0	0	0	0	0	0	0	0	0	0	0	0	0	1	0	0	3	0	0	0	0
113	2	1	3	1	1.58	60	0	4	2	7	2	0	4	2	3	1	1	1	0	0	0	0	0	1	4	1	1	0	1	4	0	0	0	1
114	1	1	3	1	1.6	65	0	4	2	7	3	1	4	0	3	1	1	1	0	0	0	0	0	1	4	1	1	0	4	4	1	0	0	1
115	2	1	1	0	1.55	54	0	4	1	NA	1	0	0	0	0	0	0	0	0	0	0	0	0	0	0	0	1	0	1	4	0	0	0	0
116	2	1	3	1	1.6	65	0	3	2	7	2	0	4	0	3	1	1	0	0	0	0	0	0	1	6	0	1	0	0	3	0	0	0	0
117	2	1	3	1	1.55	50	0	4	2	7	2	0	0	0	0	0	1	0	0	0	0	0	0	1	4	1	1	0	5	4	0	0	0	1
118	1	1	3	1	1.68	70	0	2	2	7	0	0	0	0	0	0	1	0	0	0	0	0	0	1	3	2	1	0	0	4	0	0	0	0
119	2	1	3	1	1.48	40	0	4	2	7	2	0	0	0	0	0	1	1	0	0	0	0	0	1	3	2	1	0	5	3	0	0	0	1
120	1	1	3	1	1.7	63	3	4	2	7	0	0	0	0	0	0	0	0	0	0	0	0	0	1	4	1	1	0	0	4	0	0	0	0
121	2	1	3	1	1.55	60	1	4	2	7	0	0	0	0	0	0	0	0	0	0	0	0	0	0	0	0	1	0	2	4	0	0	0	1
123	2	1	1	0	1.5	55	3	2	5	1	4	1	1	2	0	1	0	0	1	0	0	1	2	1	6	0	1	0	3	4	0	0	0	0
124	1	1	3	1	1.65	65	3	4	2	7	2	0	0	0	0	0	1	0	0	0	0	0	0	1	3	2	1	0	0	4	0	0	0	0
125	1	1	3	1	1.77	70	0	4	2	7	2	0	0	0	0	0	1	1	0	0	0	0	0	0	0	0	1	0	2	3	0	0	0	1
126	2	1	3	1	1.55	60	0	4	2	7	2	0	2	0	1	1	1	1	1	0	0	0	0	1	4	1	1	0	0	4	1	1	1	0
127	2	1	3	1	1.55	50	0	4	2	7	2	0	4	0	3	2	1	0	0	0	0	1	2	1	3	2	1	0	3	4	0	0	0	1
128	1	1	3	1	1.58	55	3	4	2	7	2	0	4	2	3	1	1	1	0	0	0	0	0	1	4	1	1	0	0	4	1	0	0	0
129	2	1	1	0	1.52	50	0	4	1	1	0	0	0	0	0	0	0	0	0	1	0	0	0	0	0	0	1	0	0	4	0	0	0	0
130	2	1	1	0	1.65	68	3	2	5	1	0	0	0	0	0	0	0	0	0	0	0	0	0	0	0	0	1	0	0	4	0	0	0	0
131	1	1	1	0	1.65	58	2	2	0	8	1	0	0	0	0	0	0	0	0	NA	0	0	0	0	0	0	1	0	0	3	0	0	0	0
132	2	1	1	0	1.56	43	2	2	0	8	3	1	0	0	0	0	0	0	0	0	0	1	2	0	0	0	1	0	0	3	0	0	0	0
133	1	1	1	0	1.74	50	2	2	5	3	2	0	0	0	0	0	1	1	0	1	1	0	0	1	3	2	1	0	2	4	0	0	0	1
134	1	1	2	0	1.63	66	1	2	1	1	0	0	0	0	0	0	0	0	0	0	0	1	0	1	3	2	1	0	0	4	0	0	0	0
135	2	1	2	0	1.5	67	1	2	1	1	0	0	0	0	0	0	0	0	0	0	0	1	0	0	0	0	1	0	0	4	0	0	0	0
136	1	1	1	0	1.76	60	4	2	5	2	0	0	0	0	0	0	0	0	0	0	0	0	0	1	3	2	1	0	1	4	0	0	0	0
137	2	1	1	0	1.56	72	1	4	1	2	2	0	1	2	0	1	0	0	1	1	1	1	1	1	4	1	1	0	0	4	0	0	0	0
138	1	1	1	0	1.7	80	1	4	5	1	0	0	0	0	0	0	0	0	0	0	0	0	0	0	0	0	1	0	0	4	0	0	0	0
140	2	1	1	0	1.75	55	2	4	5	3	5	1	4	2	3	1	0	0	0	1	1	1	1	0	0	0	1	0	2	4	0	0	0	0
141	1	1	1	0	1.7	60	1	4	5	1	0	0	0	0	0	0	0	0	0	0	0	0	0	0	0	0	1	0	0	4	0	0	0	0
142	1	1	1	0	1.68	70	1	2	1	1	0	0	0	0	0	0	0	0	0	0	0	0	0	0	0	0	1	0	0	4	0	0	0	0
143	2	1	1	0	1.53	60	0	2	1	1	1	0	0	0	0	0	0	0	0	0	0	0	0	0	0	0	1	0	0	4	0	0	0	0
144	2	1	1	0	1.63	77	3	2	0	8	0	0	0	0	0	0	0	0	0	0	0	0	0	0	0	0	1	0	1	3	0	0	0	0
145	2	1	1	0	1.52	65	0	2	0	8	0	0	0	0	0	0	0	0	0	0	0	0	0	0	0	0	1	0	0	4	0	0	0	0
146	2	NA	NA	0	1.5	125	1	4	5	1	3	1	0	0	0	0	0	0	0	0	0	NA	0	NA	0	0	0	0	0	4	0	0	0	0
147	2	1	1	0	1.53	65	0	2	0	8	0	0	0	0	0	0	0	0	0	0	0	0	0	0	0	0	1	0	0	4	0	0	0	0
148	2	1	1	0	1.53	65	1	2	0	8	4	1	2	2	2	1	0	0	0	0	0	1	1	1	4	1	1	0	0	4	0	0	0	0
149	2	1	1	0	1.52	65	0	4	5	1	2	0	1	0	0	1	0	0	0	0	0	0	0	0	0	0	1	0	1	4	0	0	0	0
150	2	1	1	0	1.5	64	1	2	5	1	0	0	0	0	0	0	0	0	0	0	0	0	0	0	0	0	1	0	0	4	0	0	0	0
151	2	1	1	0	1.54	62	0	4	1	2	0	0	0	0	0	0	0	0	0	1	0	0	0	0	0	0	1	0	0	4	0	0	0	0
152	1	1	1	0	1.58	55	0	4	1	1	1	0	0	0	0	0	0	0	0	0	0	0	0	0	0	0	1	0	0	4	0	0	0	0
153	1	1	1	0	1.73	83	1	2	5	1	0	0	0	0	0	0	0	0	0	0	0	0	0	1	3	2	1	0	0	4	0	0	0	0
154	1	1	1	0	1.6	55	0	4	5	1	1	0	0	0	0	0	0	0	0	0	0	0	0	0	0	0	1	0	0	3	0	0	0	0
155	2	1	1	0	1.67	76	1	2	1	8	0	0	0	0	0	0	0	0	0	0	0	0	0	0	0	0	1	0	0	3	0	0	0	0
156	1	1	1	0	1.72	70	0	3	1	2	0	0	0	0	0	0	0	0	0	0	0	0	0	0	0	0	1	0	0	3	0	0	0	0
157	2	1	1	0	1.62	75	0	2	5	1	1	0	0	0	0	0	0	0	0	0	0	0	0	0	0	0	1	0	0	4	0	0	0	0
158	2	1	1	0	1.5	72	0	4	5	2	3	1	1	4	0	1	0	0	0	0	0	0	0	0	0	0	1	0	7	4	NA	0	0	0
159	2	1	1	0	1.53	56	0	2	5	1	2	0	1	0	2	1	0	1	1	0	0	0	0	0	0	0	1	0	0	0	0	0	0	0
160	2	1	1	0	1.53	57	0	4	1	1	0	0	0	0	0	0	0	0	0	0	0	0	0	0	0	0	1	0	1	3	0	0	0	0
161	2	1	1	0	1.5	79	0	2	0	8	1	0	0	0	0	0	0	0	0	0	0	NA	0	0	0	0	1	0	0	3	0	0	0	0
163	1	1	1	0	1.6	62	1	2	5	1	1	0	0	0	0	0	0	0	0	0	0	0	0	0	0	0	1	0	1	4	0	0	0	0
164	2	1	1	0	1.58	70.2	1	2	5	8	0	0	0	0	0	0	0	0	0	0	0	0	0	0	0	0	1	0	0	3	0	0	0	0
165	1	1	1	0	1.66	74.5	5	2	5	8	0	0	0	0	0	0	0	0	0	0	0	0	0	0	0	0	1	0	0	4	0	0	0	0
166	1	1	1	0	1.65	60.7	1	4	1	1	1	0	0	0	0	0	0	0	0	0	1	0	0	0	0	0	1	0	0	4	0	0	0	0
167	2	1	1	0	1.5	90	1	4	5	1	0	0	0	0	0	0	0	0	1	0	0	1	1	1	3	2	1	0	0	4	0	0	0	0
168	1	1	1	0	1.82	90	3	2	0	2	1	0	0	0	0	0	0	0	0	NA	0	NA	0	NA	0	0	0	0	0	0	0	0	0	0
169	1	1	1	0	1.82	80	2	2	1	2	1	0	0	0	0	0	0	0	0	0	0	NA	0	NA	0	0	0	0	0	3	0	0	0	0
172	2	1	1	0	1.58	58	0	4	5	1	0	0	0	0	0	0	0	0	0	0	0	NA	0	NA	0	0	0	0	0	0	0	0	0	0
173	2	1	1	0	1.55	36	NA	4	1	2	2	0	0	0	0	0	0	0	1	0	0	NA	0	NA	0	0	0	0	0	0	0	0	0	0
174	2	1	1	0	1.55	52	0	4	5	1	2	0	0	3	0	0	0	0	0	1	1	1	0	0	0	0	1	0	2	4	1	3	1	0
175	1	1	3	0	1.7	65	2	2	1	1	1	0	0	0	0	0	0	0	0	0	0	0	0	1	6	0	1	0	1	3	0	0	0	0
176	2	1	1	0	1.6	72	2	4	1	2	0	0	0	0	0	0	0	0	0	0	0	0	0	1	3	2	1	0	0	3	0	0	0	0
177	1	1	3	0	1.65	55	2	4	1	1	1	0	0	0	0	1	0	0	0	1	1	1	0	0	0	0	1	0	3	3	0	0	0	0
178	1	1	3	1	1.57	60	0	4	2	7	0	0	0	0	0	0	1	0	1	0	0	0	0	1	5	2	1	0	1	4	0	0	0	0
179	1	1	3	1	1.54	70	1	4	2	7	2	0	4	0	1	1	1	1	0	0	0	1	2	0	0	0	1	0	1	4	1	0	0	0
180	2	1	3	1	1.5	75	0	4	2	7	2	0	0	0	0	0	1	0	0	0	0	0	0	1	4	1	1	0	1	4	0	0	0	0
181	2	1	3	1	1.6	75	0	2	2	7	2	0	0	0	0	0	1	1	0	0	0	0	0	0	0	0	1	0	4	3	0	0	0	0
182	1	1	3	1	1.54	55	1	4	2	7	2	0	0	0	0	0	1	0	1	0	0	0	0	1	4	1	1	0	2	3	0	0	0	0
183	2	1	1	0	1.56	45	0	2	2	1	4	1	2	3	0	1	0	0	1	1	1	1	2	1	3	2	1	0	8	4	0	0	0	0
184	1	1	3	1	1.4	50	1	4	2	7	4	1	4	5	3	2	1	1	0	1	1	0	0	1	6	0	1	0	2	3	1	0	0	0
185	1	1	1	0	1.73	70	1	2	0	8	0	0	0	0	0	0	0	0	0	0	0	0	0	1	5	2	1	0	0	4	0	0	0	0
186	2	1	1	0	1.62	68	1	2	0	1	1	0	0	0	0	0	0	0	0	0	0	0	0	0	0	0	1	0	0	4	0	0	0	0
187	1	1	3	1	1.57	52	0	1	2	7	0	0	0	0	0	0	1	1	0	0	0	0	0	0	0	0	1	0	0	3	0	0	0	0
188	1	1	3	0	1.58	53	1	2	0	1	1	0	0	0	0	0	0	0	0	0	0	0	0	0	0	0	1	0	0	3	0	0	0	0
189	2	1	3	0	1.5	55	0	2	0	1	1	0	0	0	0	0	1	0	0	0	0	0	0	0	0	0	1	0	0	3	0	0	0	0
190	2	1	3	1	1.58	45	0	4	2	7	3	1	3	5	3	2	1	1	0	0	0	0	0	0	0	0	1	0	0	4	1	0	0	0
191	2	1	3	1	1.4	74	0	4	2	7	2	0	0	0	0	0	1	0	1	0	0	1	2	1	3	2	1	0	0	4	0	0	0	0
192	1	1	3	1	1.58	51	1	4	2	7	2	0	0	0	0	0	1	1	1	0	0	0	0	0	0	0	1	0	0	4	0	0	0	0
193	1	1	3	1	1.6	72	0	4	2	7	2	0	0	0	0	0	1	0	1	0	0	0	0	0	0	0	1	0	0	3	0	0	0	0
194	1	NA	3	1	1.52	64	1	4	2	7	1	0	0	0	0	0	1	1	0	1	1	1	1	1	4	1	1	0	1	3	0	0	0	0
195	1	1	3	1	1.66	68	1	4	2	7	0	0	0	0	0	0	0	0	1	0	0	1	2	0	0	0	1	0	0	4	0	0	0	0
196	2	1	3	1	1.52	56	0	4	2	7	0	0	0	0	0	0	1	1	0	0	0	0	0	0	0	0	1	0	0	4	0	0	0	0
197	2	1	3	1	1.4	50	2	4	2	7	2	0	0	0	0	0	0	0	1	0	0	0	0	0	0	0	1	0	1	3	0	0	0	0
198	1	1	3	1	1.58	67	1	4	2	7	0	0	0	0	0	0	0	0	1	0	0	0	0	0	0	0	1	0	1	3	0	0	0	0
199	1	1	6	0	1.7	70	3	2	0	3	2	0	0	0	3	1	0	0	0	0	0	0	0	1	6	0	1	0	4	3	0	0	0	0
200	2	1	6	0	1.6	65	1	4	5	1	1	0	0	0	0	0	0	0	0	0	0	0	0	1	3	2	1	0	4	4	0	0	0	0
201	1	1	1	0	1.73	76	2	2	0	2	0	0	0	0	0	0	0	0	0	0	0	0	0	0	0	0	1	0	0	3	0	0	0	0
202	2	1	1	0	1.56	55	1	4	5	1	3	1	1	10	3	2	1	0	0	0	0	1	2	0	0	0	1	1	0	0	NA	0	0	0
203	1	1	1	0	1.6	58	5	2	1	1	0	0	0	0	0	0	0	0	0	0	0	0	0	0	0	0	1	0	5	4	0	0	0	0
204	2	1	2	0	1.37	42.5	0	4	1	2	3	1	2	5	3	2	1	1	0	0	0	1	2	1	4	1	1	1	4	4	0	0	0	0
205	2	1	1	0	1.64	68	3	4	1	2	2	0	1	3	0	1	1	0	1	0	0	1	1	1	2	2	1	0	1	4	0	0	0	0
206	2	1	2	0	1.53	32	5	2	1	2	2	0	0	0	0	0	0	0	0	0	0	0	0	0	0	0	1	0	5	4	0	0	0	1
207	1	1	1	0	1.7	70	3	2	5	1	1	0	1	0	0	1	1	0	1	1	0	1	1	0	0	0	1	0	6	4	0	0	0	0
208	2	1	2	0	1.62	55	0	4	1	2	2	0	0	2	0	1	0	0	1	1	1	1	1	0	0	0	1	0	3	3	0	0	0	0
209	2	1	1	0	1.5	70	3	2	1	2	2	0	0	2	1	1	0		0	1	1	0	0	1	3	2	1	0	5	4	1	2	1	1
210	2	1	1	0	1.55	80	4	2	1	2	4	1	4	3	0	2	0	0	0	0	0	0	0	0	0	0	1	0	3	3	0	0	0	1
211	1	1	1	0	1.65	70	5	2	1	2	1	0	0	0	0	0	0	0	0	0	0	0	0	0	0	0	1	0	5	4	0	0	0	1
212	2	1	1	0	1.6	60	4	2	1	2	0	0	0	0	0	0	0	0	0	0	0	0	0	0	0	0	1	0	3	3	0	0	0	0
215	1	1	1	0	1.8	70	1	2	1	2	3	1	1	0	3	1	1	0	1	1	0	1	2	1	3	2	1	0	6	4	1	2	1	1
216	2	1	1	0	1.6	70	0	2	5	2	5	1	4	9	3	2	1	1	0	NA	1	1	2	1	3	2	1	0	7	4	1	1	1	1
218	1	1	1	0	1.8	85	3	2	1	2	0	0	0	0	0	0	0	0	0	0	0	0	0	0	0	0	1	0	3	3	0	0	0	0
219	1	1	1	0	1.74	65	4	2	0	1	0	0	0	0	0	0	0	0	0	1	0	1	1	1	3	2	1	0	4	4	0	0	0	0
220	1	1	1	0	1.68	70	4	2	0	1	0	0	0	0	0	0	0	0	0	0	0	0	0	0	0	0	0	0	4	4	0	0	0	0
221	2	1	1	0	1.63	55	3	2	0	1	1	0	0	0	0	0	0	0	0	1	1	1	0	0	0	0	1	0	4	3	0	0	0	0
222	1	1	1	0	1.76	73	1	2	0	1	0	0	0	0	0	0	0	0	0	NA	0	NA	0	NA	0	0	0	0	4	4	0	0	0	0
223	2	1	1	0	1.6	65	0	2	0	1	1	0	0	0	0	0	0	0	0	NA	0	NA	0	NA	0	0	0	0	4	4	0	0	0	0
224	2	1	1	0	1.68	60	3	2	5	1	4	1	1	5	0	1	1	0	1	1		0	0	NA	0	0	0	0	0	0	NA	0	0	0
225	2	1	1	0	1.6	50	2	2	5	2	2	0	1	1	1	1	1	1	0	1	1	0	0	0	0	0	1	2	4	4	0	0	0	0
226	1	1	2	0	1.68	50	0	4	5	1	3	1	1	0	1	1	1	1	1	0	0	0	0	0	0	0	1	0	1	4	0	0	0	0
228	1	1	1	0	1.74	140	4	2	3	2	1	0	0	0	0	1	0	0	1	NA	0	0	0	1	3	2	1	0	7	4	0	0	0	0
229	2	1	1	0	1.57	51	2	2	1	2	3	1	0	0	0	0	1	1	1	NA	0	1	0	1	4	1	1	0	6	4	0	0	0	0
230	1	1	1	0	1.7	75	5	4	5	1	2	0	1	0	2	1	1	1	1	NA	0	1	1	1	3	2	1	0	5	4	0	0	0	1
231	2	1	1	0	1.6	50	2	2	5	2	2	0	1	0	2	1	1	1	1	NA	0	0	0	1	5	2	1	0	4	4	0	0	0	0
232	1	1	1	0	1.65	60	2	2	5	1	3	1	1	0	0	1	0	0	1	0	0	0	0	1	4	1	1	0	3	4	0	0	0	0
233	1	1	1	0	1.65	69	2	2	1	2	3	1	1	0	0	1	0	0	0	1	1	1	1	0	0	0	1	0	1	4	1	0	0	0
234	2	1	1	0	1.48	55	2	2	5	1	0	0	0	0	0	0	1	1	0	0	0	0	0	0	0	0	1	0	0	3	0	0	0	0
236	1	1	1	0	1.7	65	1	2	5	1	2	0	0	0	0	0	0	0	0	0	0	0	0	1	6	0	1	0	1	3	0	0	0	1
237	2	1	2	0	1.6	40	0	4	1	3	3	1	1	0	0	0	0	0	1	0	0	0	0	0	0	0	1	0	0	4	0	0	0	1
238	1	1	1	0	1.67	60	0	2	5	2	0	0	0	0	0	0	0	0	1	0	0	1	2	1	3	2	1	0	4	3	0	0	0	0
239	1	1	1	0	1.75	85	1	4	1	3	0	0	0	0	0	0	0	0	1	1	1	1	1	0	0	0	1	0	0	4	0	0	0	0
240	1	1	1	0	1.72	71	2	4	1	3	1	0	1	0	0	1	0	0	0	1	1	1	0	0	0	0	1	0	0	4	0	0	0	0
241	2	1	1	0	1.55	41	1	4	1	2	0	0	0	0	0	0	0	0	0	1	0	1	1	0	0	0	1	0	0	4	0	0	0	0
242	2	1	1	0	1.5	45	0	4	1	2	3	1	0	0	0	0	0	0	1	0	0	0	0	0	0	0	1	0	1	4	0	0	0	0
243	2	1	2	1	1.55	50	2	2	2	7	0	0	0	0	0	0	0	0	0	0	0	1	2	0	0	0	1	0	1	3	0	0	0	0
244	1	1	2	1	1.7	80	0	1	2	8	0	0	0	0	0	0	1	0	1	0	0	1	1	1	4	1	1	0	0	3	0	0	0	0
245	1	1	2	1	1.7	70	1	3	2	7	0	0	0	0	0	0	1	1	0	0	0	1	2	1	3	2	1	0	2	3	0	0	0	0
246	1	1	2	1	1.75	70	2	4	2	7	0	0	0	0	0	0	1	1	0	0	0	1	2	1	3	2	1	0	1	4	0	0	0	0
247	2	1	2	1	1.6	90	0	4	2	7	1	0	0	0	0	0	1	1	1	0	0	1	1	1	3	2	1	0	2	4	0	0	0	0
248	1	1	2	1	1.6	60	2	4	2	1	1	0	0	0	0	0	1	0	0	1	0	0	0	1	4	1	1	0	1	4	0	0	0	0
249	1	1	2	1	1.73	70	1	4	2	7	1	0	0	0	0	0	1	0	1	0	0	1	1	1	5	2	1	0	3	3	0	0	0	0
250	1	1	2	1	1.6	80	0	1	2	8	0	0	1	2	1	1	1	0	1	0	0	0	0	1	3	2	1	0	0	3	1	0	0	0
251	1	1	2	1	1.75	70	2	2	2	7	3	1	4	2	3	2	1	1	0	0	0	1	0	1	3	2	1	0	4	3	0	0	0	0
252	2	1	2	1	1.6	60	1	4	2	8	1	0	0	0	0	0	1	0	1	0	0	0	1	1	5	2	1	0	0	4	0	0	0	0
253	1	NA	2	1	1.75	75	2	4	2	NA	0	0	0	0	0	0	1	0	1	1	0	0	0	1	5	2	1	0	3	3	0	0	0	0
254	1	1	2	1	1.68	56	5	4	2	7	0	0	0	0	0	0	1	0	0	0	0	1	1	1	6	0	1	0	1	4	0	0	0	0
255	2	1	2	1	1.57	50	1	4	2	8	1	0	0	0	0	0	1	0	0	0	0	1	1	1	4	1	1	0	0	4	0	0	0	0
256	2	1	2	1	1.65	65	1	4	2	7	0	0	0	0	0	0	1	1	0	0	0	1	1	1	4	1	1	0	1	4	0	0	0	0
257	2	1	2	1	1.5	60	0	1	2	7	2	0	4	2	1	1	1	1	1	0	0	1	2	1	3	2	1	0	0	4	0	0	0	0
258	1	1	2	1	1.74	70	1	4	2	7	0	0	0	0	0	0	1	1	0	0	0	1	1	1	4	1	1	0	0	4	0	0	0	0
259	2	1	2	1	1.55	50	0	4	2	1	2	0	4	5	3	1	1	0	0	0	0	0	0	1	4	1	1	0	3	3	0	0	0	0
260	2	1	2	1	1.6	60	4	4	2	7	0	0	3	0	3	2	1	1	1	0	0	0	0	1	4	1	1	0	1	3	0	0	0	0
261	1	1	1	0	1.67	60	0	2	5	2	0	0	0	0	0	0	0	0	1	0	0	1	1	1	3	2	1	0	1	3	0	0	0	0
262	2	1	2	1	1.63	60	0	2	2	7	0	0	0	0	0	0	1	0	0	0	0	0	0	1	3	2	1	0	2	4	0	0	0	0
263	2	1	2	1	1.6	80	0	4	2	7	2	0	3	2	2	1	1	1	0	0	0	1	2	1	3	2	1	0	2	4	0	0	0	0
264	1	1	1	0	1.72	71	2	4	1	3	0	0	1	0	0	1	0	0	0	0	0	1	0	0	0	0	1	0	0	4	0	0	0	0
265	2	1	1	0	1.65	68	0	4	1	2	2	0	0	0	0	0	1	0	0	1	0	1	1	1	4	1	1	0	2	4	0	0	0	0
266	1	1	1	0	1.75	75	1	4	1	2	1	0	4	0	0	0	1	1	1	1	0	0	0	1	6	0	1	0	1	4	0	0	0	0
267	1	1	1	0	1.75	78	1	4	1	2	1	0	0	0	0	0	1	0	1	0	0	0	0	1	5	2	1	0	1	4	0	0	0	0
268	2	1	1	0	1.5	130	0	4	5	1	2	0	0	0	0	1	0	0	0	0	0	NA	0	NA	0	0	0	0	0	0	0	0	0	0
269	1	1	3	1	1.6	165	0	1	2	7	2	0	4	5	2	1	1	0	1	0	0	0	0	0	0	0	1	0	2	3	0	0	0	1
270	2	1	3	1	1.6	70	0	4	2	7	2	0	0	0	0	0	1	1	0	0	0	0	0	1	4	1	1	0	2	4	0	0	0	1
271	2	1	3	1	1.5	60	1	2	2	7	0	0	0	0	0	0	1	0	0	0	0	0	0	1	3	2	1	0	2	4	0	0	0	1
272	1	1	3	1	1.7	85	0	2	2	NA	2	0	0	0	0	0	1	1	0	0	0	0	0	1	3	2	1	0	1	4	0	0	0	1
273	2	1	3	1	1.55	70	0	2	2	7	0	0	0	0	0	0	1	1	1	0	0	0	0	1	3	2	1	0	2	3	0	0	0	1
274	1	1	3	1	1.7	75	1	4	2	7	0	0	0	0	0	0	0	0	1	0	0	0	0	1	3	2	1	0	1	3	0	0	0	1
275	2	1	2	0	1.52	75	0	4	1	1	3	1	3	4	3	2	1	1	0	0	0	0	0	1	1	2	1	0	7	4	1	2	1	1
276	2	1	1	0	1.55	60	0	4	5	1	4	1	0	0	0	0	0	0	1	1	1	0	0	1	6	0	1	0	10	4	0	0	0	0
277	2	1	2	0	1.5	52	1	4	1	2	0	0	0	0	0	0	0	0	0	0	0	1	1	1	6	0	1	0	1	4	0	0	0	0
278	2	1	1	0	1.55	38	3	2	5	2	1	0	0	0	0	0	1	0	0	1	1	0	0	0	0	0	1	0	7	3	0	0	0	0
279	1	1	1	0	1.76	65	5	2	5	1	2	0	0	0	0	1	1	1	1	0	0	1	0	1	5	2	1	0	4	4	0	0	0	0
280	2	1	1	0	1.67	70	3	2	5	1	2	0	1	2	0	1	0	0	1	1	1	0	0	1	6	0	1	0	7	4	0	0	0	0
281	1	1	1	0	1.67	65	1	1	0	3	0	0	0	0	0	0	1	0	0	0	0	0	0	1	4	1	1	0	3	3	0	0	0	0
282	2	1	1	0	1.47	62	2	2	0	3	1	0	0	0	0	0	1	0	0	0	0	0	0	0	0	0	1	0	3	3	0	0	0	0
283	1	1	6	0	1.7	72	0	2	5	8	0	0	0	0	0	1	0	0	0	0	0	0	0	0	0	0	1	0	3	3	0	0	0	0
284	2	1	2	0	1.6	80	1	4	1	1	0	0	0	0	0	0	0	0	0	0	0	1	1	0	0	0	1	0	0	3	0	0	0	0
285	1	1	2	1	1.7	70	1	4	2	7	1	0	0	0	0	0	1	0	0	0	0	1	1	0	0	0	1	0	6	3	0	0	0	0
286	2	1	2	1	1.66	70	1	1	2	7	0	0	0	0	0	0	1	0	0	0	0	1	1	0	0	0	1	0	1	3	0	0	0	0
287	1	1	2	1	1.6	60	1	1	2	7	0	0	0	0	0	0	1	0	0	0	0	1	1	1	3	2	1	0	2	4	0	0	0	0
288	1	1	2	1	1.75	70	4	2	2	7	1	0	0	0	0	0	1	0	1	0	0	1	1	0	0	0	1	0	4	4	0	0	0	0
289	2	1	2	1	1.67	65	1	2	2	7	0	0	0	0	0	0	0	0	0	0	0	0	0	0	0	0	1	0	1	3	0	0	0	0
290	2	1	2	1	1.6	70	1	4	2	7	0	0	0	0	0	0	1	0	0	0	0	0	0	0	0	0	1	0	1	4	0	0	0	0
291	2	1	2	1	1.65	60	1	4	2	7	1	0	0	0	0	0	1	0	0	0	0	0	0	0	0	0	1	0	0	4	0	0	0	0
292	2	1	2	1	1.6	65	2	4	2	7	1	0	0	0	0	0	1	0	0	0	0	1	1	0	0	0	1	0	1	4	0	0	0	0
293	2	1	2	1	1.6	65	1	4	2	7	1	0	0	0	0	0	1	1	0	0	0	0	0	1	3	2	1	0	1	4	0	0	0	0
294	2	1	2	1	1.62	60	1	1	2	7	0	0	0	0	0	0	0	0	0	0	0	0	0	0	0	0	1	0	2	3	0	0	0	0
295	2	1	2	1	1.6	50	0	4	2	7	1	0	0	0	0	0	1	1	0	0	0	0	0	1	4	1	1	0	0	4	0	0	0	0
296	2	1	2	1	1.65	70	1	4	2	7	1	0	0	0	0	0	1	1	0	0	0	1	1	0	0	0	1	0	3	3	0	0	0	0
297	1	1	1	1	1.65	65	1	3	2	7	2	0	0	0	0	0	1	1	0	0	0	0	0	0	0	0	1	0	1	2	0	0	0	0
298	2	1	2	1	1.55	60	1	4	0	7	1	0	0	0	0	0	1	1	0	0	0	0	0	0	0	0	1	0	1	0	0	0	0	0
299	1	1	2	1	1.65	70	1	2	2	7	1	0	0	0	0	0	1	1	0	0	0	0	0	1	4	1	1	0	0	4	0	0	0	0
300	1	1	2	1	1.65	50	0	1	2	7	4	1	1	0	1	2	1	1	1	1	1	1	1	1	3	2	1	0	3	3	0	0	0	0
301	2	1	2	1	1.65	50	1	3	2	7	4	1	3	0	0	1	0	0	0	0	0	0	0	0	0	0	1	0	1	1	1	1	1	0
302	2	1	2	1	1.55	60	1	3	2	7	1	0	0	0	0	0	0	0	0	0	0	0	0	0	0	0	1	0	1	3	0	0	0	0
303	1	1	2	1	1.72	75	1	2	2	7	2	0	4	0	0	0	1	1	1	0	0	0	0	1	3	2	1	0	2	4	0	0	0	0
304	1	1	2	1	1.65	60	1	2	2	7	3	1	4	0	0	0	0	0	1	0	0	0	0	0	0	0	1	0	3	3	0	0	0	0
305	2	1	2	1	1.55	70	1	4	2	7	1	0	0	0	0	0	1	1	0	0	0	1	1	1	3	2	1	0	2	4	0	0	0	0
306	1	1	2	1	1.65	55	1	2	2	7	2	0	0	0	0	0	0	0	0	0	0	0	0	0	0	0	1	0	1	3	0	0	0	0
307	2	1	2	1	1.6	58	0	4	2	7	1	0	0	0	0	0	0	0	0	0	0	1	1	0	0	0	1	0	1	3	0	0	0	0
308	2	1	2	1	1.6	60	1	4	2	7	2	0	0	0	0	0	0	0	0	0	0	0	0	0	0	0	1	0	1	4	0	0	0	0
309	2	1	2	1	1.62	60	1	4	2	7	2	0	0	0	0	0	1	1	0	0	0	0	0	0	0	0	1	0	1	3	0	0	0	0
310	2	1	2	1	1.58	55	0	4	2	7	2	0	0	0	0	0	1	1	0	0	0	0	0	1	3	2	1	0	0	4	0	0	0	0
311	2	1	2	1	1.6	56	1	2	2	7	2	0	0	0	0	0	1	1	0	0	0	0	0	0	0	0	1	0	1	3	0	0	0	0
312	2	1	2	1	1.62	65	0	4	2	7	1	0	0	0	0	0	1	1	0	0	0	0	0	1	4	1	1	0	1	4	0	0	0	0
313	2	1	2	1	1.62	55	1	4	2	7	2	0	0	0	0	0	1	1	0	0	0	0	0	0	0	0	1	0	2	1	0	0	0	0
314	1	1	2	1	1.65	70	1	4	2	7	1	0	4	0	0	0	1	1	0	0	0	1	0	1	3	2	1	0	1	3	0	0	0	0
315	1	1	2	1	1.73	65	1	4	2	7	1	0	0	0	0	0	0	0	0	0	0	0	0	0	0	0	1	0	1	4	0	0	0	0
317	1	1	2	1	1.73	65	1	4	2	7	1	0	0	0	0	0	1	1	0	0	0	0	0	1	3	2	1	0	6	4	0	0	0	0
318	2	1	2	1	1.6	55	4	4	2	7	0	0	0	0	0	0	1	0	1	0	1	0	0	0	0	0	1	0	1	4	0	0	0	0
321	1	1	2	1	1.6	70	3	2	2	7	0	0	0	0	0	0	0	0	0	1	0	0	0	1	6	0	1	0	1	4	0	0	0	0
322	1	1	2	1	1.67	70	0	4	2	7	0	0	0	0	0	0	0	0	0	0	0	0	0	1	3	2	1	0	1	4	0	0	0	0
323	1	1	2	1	1.68	60	5	2	2	7	2	0	4	0	2	1	1	1	0	0	0	1	1	1	4	1	1	0	2	3	0	0	0	0
324	1	1	2	1	1.68	60	3	2	2	7	2	0	3	0	2	1	1	1	1	0	0	1	1	1	4	1	1	0	1	4	0	0	0	0
325	1	1	2	1	1.73	60	2	4	2	7	2	0	3	0	2	1	0	0	0	0	0	0	0	0	0	0	1	0	5	3	0	0	0	0
326	2	1	2	1	1.6	65	0	4	2	7	2	0	4	0	2	1	1	1	0	0	0	1	1	0	0	0	1	0	1	3	0	0	0	0
327	1	1	2	1	1.73	70	0	4	2	7	0	0	0	0	0	0	1	0	0	0	0	0	0	1	4	1	1	0	2	4	0	0	0	0
328	2	1	1	1	1.5	80	0	4	2	7	4	1	4	0	3	2	1	1	0	0	0	1	0	0	0	0	1	0	2	4	0	0	0	0
329	1	1	2	1	1.62	55	0	4	2	7	2	0	3	0	3	1	1	1	1	0	0	0	0	1	5	2	1	0	1	4	0	0	0	0
330	1	1	2	1	1.65	50	1	4	2	7	3	1	3	0	3	1	1	1	0	0	0	1	1	1	5	2	1	0	1	3	0	0	0	0
331	2	1	2	1	1.5	50	0	4	2	7	2	0	3	3	3	2	0	0	0	0	0	0	0	1	3	2	1	0	2	4	0	0	0	0
332	2	1	2	1	1.59	70	0	2	2	7	2	0	3	1	2	1	1	1	0	0	0	1	1	1	3	2	1	0	3	4	0	0	0	0
333	1	1	2	1	1.68	80	1	2	2	7	2	0	3	0	2	1	1	1	0	0	0	1	1	1	3	2	1	0	2	4	0	0	0	0
334	2	1	2	1	1.65	55	2	4	2	7	2	0	4	0	2	1	1	1	0	0	0	1	1	1	3	2	1	0	2	4	0	0	0	0
335	2	1	2	1	1.6	70	0	4	2	7	2	0	4	0	3	1	1	1	0	0	0	1	1	1	3	2	1	0	1	4	0	0	0	0
336	2	1	2	1	1.65	60	3	4	2	7	2	0	2	0	2	1	1	0	1	0	0	1	2	1	3	2	1	0	1	4	0	0	0	0
337	2	1	2	1	1.41	42	1	4	2	7	2	0	3	8	2	1	1	1	0	0	0	1	1	1	4	1	1	0	3	4	0	0	0	0
338	2	1	2	1	1.55	5	0	4	2	7	4	1	4	4	2	2	1	1	0	0	0	1	2	1	3	2	1	0	0	4	0	0	0	0
339	2	1	2	1	1.5	70	0	4	2	7	2	0	4	2	3	2	1	1	0	0	0	1	1	1	4	1	1	0	1	4	0	0	0	0
340	2	1	2	1	1.5	50	0	4	2	7	2	0	4	5	2	2	1	1	0	0	0	1	1	0	0	0	1	0	0	3	0	0	0	0
341	1	1	2	1	1.73	70	1	2	2	7	2	0	2	0	2	1	1	1	0	0	0	1	2	1	3	2	1	0	1	3	0	0	0	0
342	1	1	2	1	1.75	71	1	3	2	7	2	0	0	0	0	0	1	1	1	1	1	0	0	1	4	1	1	0	1	3	0	0	0	0
343	1	1	2	1	1.7	65	1	4	2	7	0	0	4	0	0	0	1	1	0	0	0	0	0	1	3	2	1	0	3	3	0	0	0	0
344	2	1	2	1	1.5	59.5	1	4	0	7	2	0	0	0	0	0	1	1	0	0	0	0	0	1	3	2	1	0	3	4	0	0	0	0
345	2	1	2	1	1.68	150	0	4	2	7	1	0	0	0	0	0	1	1	0	0	0	0	0	1	6	0	1	0	0	4	0	0	0	0
346	1	1	2	1	1.65	70	3	4	2	7	2	0	1	3	0	1	0	0	1	0	0	1	2	0	0	0	1	0	0	4	0	0	0	0
347	1	1	2	1	1.75	76	3	4	2	7	3	1	3	3	0	1	0	0	0	0	0	1	0	0	0	0	1	0	4	3	0	0	0	0
348	2	1	1	0	1.55	57	1	2	5	2	0	0	0	0	0	0	0	0	0	0	0	0	0	0	0	0	1	0	3	3	0	0	0	0
350	2	1	2	1	1.6	65	0	4	2	7	2	0	0	0	0	0	0	0	0	0	0	1	1	0	0	0	1	0	5	4	0	0	0	0
351	2	1	2	1	1.52	50	1	4	2	7	2	0	4	0	0	0	1	1	0	0	0	0	0	1	5	2	1	0	1	4	0	0	0	0
352	1	1	2	1	1.75	130	1	2	2	7	1	0	0	0	0	0	1	1	0	0	0	1	2	1	4	1	1	0	2	4	0	0	0	0
353	2	1	2	1	1.6	120	1	4	2	7	2	0	0	0	0	0	0	0	1	0	0	0	0	0	0	0	1	0	1	4	0	0	0	1
354	1	NA	2	1	1.72	70	0	4	2	7	1	0	0	0	0	0	0	0	1	0	0	0	0	1	6	0	1	0	1	4	0	0	0	0
355	1	1	2	1	1.7	65	2	4	2	7	2	0	3	0	2	1	1	1	0	0	0	1	1	1	6	0	1	0	1	4	0	0	0	0
356	2	1	2	1	1.59	55	1	4	2	7	2	0	1	0	0	1	0	0	1	0	0	1	1	1	3	2	1	0	2	4	0	0	0	0
357	2	1	2	1	1.72	70	1	4	2	7	0	0	4	0	0	0	1	1	0	0	0	0	0	0	0	0	1	0	2	4	0	0	0	0
358	1	1	2	1	1.65	60	2	4	2	7	1	0	0	0	0	0	0	1	0	0	0	1	1	NA	0	0	1	0	1	4	0	0	0	0
359	1	1	2	1	1.7	75	3	4	2	1	0	0	0	0	0	1	0	0	0	0	0	1	0	0	0	0	1	0	1	4	0	0	0	0
360	2	1	2	1	1.65	80	2	4	2	7	0	0	1	0	0	1	0	0	0	0	0	1	0	0	0	0	1	0	1	4	0	0	0	0
361	1	1	2	1	1.65	70	3	2	2	7	0	0	0	0	0	0	0	0	0	0	0	0	0	0	0	0	1	0	0	4	0	0	0	0
362	2	1	2	1	1.5	50	1	2	2	7	1	0	0	0	0	0	1	0	0	0	0	0	0	1	6	0	1	0	0	3	0	0	0	0
363	1	1	2	1	1.69	71	2	2	2	7	1	0	0	0	0	0	0	0	1	0	0	1	1	1	4	1	1	0	3	4	0	0	0	0
364	2	2	2	1	1.6	150	2	2	2	7	5	1	4	3	0	2	0	0	0	0	0	0	0	0	0	0	1	0	2	4	0	0	0	1
365	2	1	1	0	1.58	49	3	2	1	1	3	1	0	0	0	1	0	0	0	1	1	1	0	0	0	0	1	0	5	3	1	2	1	0
366	1	1	1	0	1.6	65	3	2	1	1	4	1	1	2	1	1	0	0	1	0	0	1	2	0	0	0	1	1	7	4	1	2	1	0
368	1	1	1	0	1.7	55	3	2	1	1	5	1	3	3	3	2	0	0	0	1	1	1	2	0	0	0	1	1	8	4	0	0	0	1
369	2	1	1	0	1.55	58	1	4	1	2	4	1	2	5	2	1	0	0	1	0	0	1	2	0	0	0	1	0	9	4	0	0	0	0
370	2	1	1	0	1.56	70	1	4	5	3	1	0	0	0	0	0	0	0	0	0	0	NA	0	NA	0	0	0	0	0	0	NA	0	0	0
371	2	1	1	0	1.46	78	1	2	0	1	3	1	1	2	0	1	0	0	1	1	1	0	0	1	6	0	1	0	NA	4	0	0	0	0
372	2	1	1	0	1.7	160	1	2	5	8	2	0	0	0	0	0	0	0	0	0	0	0	0	0	0	0	0	0	0	3	0	0	0	0
373	1	1	1	0	1.74	72	2	2	0	1	3	1	0	2	0	1	0	0	1	1	1	1	1	0	0	0	1	0	7	4	0	0	0	0
374	2	1	1	0	1.48	53.9	0	2	5	1	1	0	0	0	0	0	0	0	1	0	0	0	0	0	0	0	1	0	4	3	0	0	0	0
375	1	1	1	0	1.7	80	2	2	1	8	0	0	0	0	0		0	0	0	0	0	0	0	0	0	0	1	0	3	3	0	0	0	0
376	1	1	1	0	1.7	90	4	4	1	1	1	0	0	0	0	0	1	1	0	0	0	1	1	0	0	0	1	0	4	3	0	0	0	0
377	2	1	1	0	1.64	63	3	4	5	1	1	0	0	0	0	0	0	0	0	0	0	1	0	0	0	0	1	0	5	4	0	0	0	0
378	2	1	1	0	1.62	70	1	4	1	2	0	0	1	1	0	1	1	0	0	1	1	0	0	0	0	0	1	0	4	4	0	0	0	0
379	1	1	1	0	1.68	72	1	2	5	1	0	0	0	0	0	0	0	0	0	0	0	0	0	0	0	0	1	0	3	3	0	0	0	0
380	2	1	1	0	1.58	70	2	2	5	1	1	0	0	0	0	1	0	0	0	0	0	0	0	0	0	0	1	0	3	3	0	0	0	0
381	2	1	2	0	1.67	73	2	4	5	2	1	0	0	0	0	0	0	0	0	1	1	1	1	0	0	0	1	0	0	3	0	0	0	0
382	2	1	1	0	1.6	62	0	4	1	3	0	0	0	0	0	0	0	0	0	0	0	1	0	1	4	1	1	0	6	4	0	0	0	0
383	1	1	2	0	1.7	60	1	2	0	2	0	0	0	0	0	0	0	0	0	0	0	0	0	1	6	0	1	0	0	3	0	0	0	0
384	1	1	2	0	1.84	84	3	2	0	8	0	0	0	0	0	0	0	0	0	0	0	0	0	0	0	0	1	0	0	3	0	0	0	0
385	2	1	2	0	1.63	69	1	2	5	8	0	0	0	0	0	0	1	0	0	0	0	0	0	1	6	0	1	0	1	3	0	0	0	0
386	2	1	2	0	1.58	52	0	4	5	1	0	0	0	0	0	0	1	0	0	0	0	0	0	0	0	0	1	0	2	4	0	0	0	0
387	2	1	2	0	1.6	75.5	0	2	5	1	3	1	1	2	0	1	1	0	0	0	0	1	2	0	0	0	1	0	1	3	0	0	0	0
388	1	1	2	0	1.7	56	3	2	5	2	0	0	0	0	0	0	0	0	0	0	0	1	1	1	6	0	1	0	1	4	0	0	0	0
389	1	1	6	1	1.65	72	2	2	2	7	3	1	2	0	0	1	0	0	0	0	0	1	2	0	0	0	1	0	10	3	NA	0	0	0
390	2	1	6	1	1.6	70	3	2	2	7	2	0	4	0	1	1	1	0	0	0	0	0	0	1	6	0	1	0	7	4	0	0	0	0
391	2	1	6	1	1.6	80	3	2	2	NA	3	1	0	0	0	0	1	0	1	0	0	0	0	0	0	0	1	0	5	3	0	0	0	0
392	2	1	6	1	1.63	80	2	4	2	7	1	0	0	0	0	0	0	0	0	1	1	1	0	0	0	0	1	0	3	3	0	0	0	0
393	2	1	6	1	1.55	72	0	4	2	7	2	0	4	7	0	2	1	0	0	0	0	0	0	1	6	0	1	0	4	4	1	0	0	0
394	2	NA	6	1	1.58	75	1	1	2	7	1	0	0	0	0	0	0	0	0	0	0	0	0	0	0	0	1	0	3	3	0	0	0	0
395	2	1	6	1	1.5	55	0	2	2	7	1	0	0	0	0	0	1	0	0	0	0	0	0	0	0	0	1	0	4	4	0	0	0	0
396	2	1	6	1	1.55	60	0	4	2	7	2	0	0	0	0	0	1	0	0	0	0	1	2	0	0	0	1	0	4	3	0	0	0	0
397	2	1	6	1	1.5	42	1	4	2	7	0	0	0	0	0	0	1	1	1	0	0	0	0	1	5	2	1	0	4	4	0	0	0	0
398	2	1	6	1	1.6	55	0	2	2	7	2	0	0	0	0	0	1	0	0	0	0	0	0	1	6	0	1	0	6	4	0	0	0	0
399	2	1	6	1	1.5	55	0	4	2	7	4	1	4	3	3	1	0	0	0	1	1	0	0	1	4	1	1	0	4	4	0	0	0	0
400	1	1	6	1	1.62	60	3	2	2	7	1	0	0	0	0	0	0	0	0	0	0	1	2	0	0	0	1	0	0	4	0	0	0	0
401	2	1	6	1	1.5	50	1	2	2	7	2	0	0	0	0	0	0	0	0	0	0	1	2	0	0	0	1	0	0	4	0	0	0	0
402	2	1	6	1	1.6	65	0	4	2	7	3	1	2	2	0	1	0	0	1	0	0	0	0	0	0	0	1	0	0	4	0	0	0	0
403	2	1	6	1	1.65	65	0	4	2	7	3	1	4	0	3	3	1	0	0	0	0	0	0	1	0	0	0	0	0	4	NA	0	0	0
404	2	NA	6	1	1.6	50	0	2	2	7	3	1	0	0	0	0	1	0	0	0	0	0	0	1	3	2	1	0	0	4	0	0	0	0
405	2	1	6	1	1.5	55	1	2	2	7	2	0	0	0	0	0	1	1	0	0	0	1	1	1	3	2	1	0	0	4	0	0	0	0
406	2	1	6	1	1.5	48	0	4	2	7	1	0	0	0	0	0	1	0	1	0	0	0	0	0	0	0	1	0	0	4	0	0	0	0
407	2	1	6	1	1.5	45	0	4	2	7	0	0	0	0	0	0	0	0	0	0	0	0	0	1	4	1	1	0	0	4	0	0	0	0
409	2	1	6	1	1.5	70	1	4	2	7	2	0	0	0	1	1	1	0	0	0	0	0	0	1	5	2	1	0	0	4	0	0	0	0
410	2	1	6	1	1.48	47	0	4	2	7	3	1	0	0	0	0	1	0	0	0	0	0	0	1	4	1	1	0	0	4	0	0	0	0
411	1	1	6	1	1.58	50	2	2	2	7	2	0	0	0	0	0	1	0	0	0	0	0	0	0	0	0	1	0	0	4	0	0	0	0
412	1	1	6	1	1.65	70	2	4	2	7	2	0	0	0	0	0	1	0	1	0	0	0	0	1	3	2	1	0	0	4	0	0	0	0
413	1	1	6	1	1.6	60	0	2	2	1	0	0	0	0	0	0	0	0	0	0	0	0	0	0	0	0	1	0	0	3	0	0	0	0
414	2	1	6	1	1.65	80	0	2	2	7	3	1	4	0	0	1	1	1	0	0	0	0	0	0	0	0	1	0	0	3	0	0	0	1
415	2	NA	6	1	1.6	40	0	1	2	7	2	0	0	0	0	0	1	0	0	0	0	0	0	1	6	0	1	0	0	4	0	0	0	0
416	2	1	6	1	1.7	80	0	2	2	7	2	0	0	0	0	0	1	0	0	0	0	0	0	0	0	0	1	0	0	3	0	0	0	0
417	2	1	6	1	1.55	65	0	4	2	7	3	1	0	0	0	0	1	0	0	0	0	0	0	0	0	0	1	0	0	4	0	0	0	0
418	2	1	6	1	1.66	55	5	4	2	7	0	0	0	0	0	0	1	0	0	0	0	0	0	1	4	1	1	0	0	4	0	0	0	0
419	2	1	6	1	1.65	65	2	4	2	7	2	0	0	0	0	1	1	1	1	0	0	0	0	1	5	2	1	0	0	4	0	0	0	0
420	2	1	6	1	1.6	55	0	4	2	7	4	1	2	3	1	1	1	1	0	0	0	0	0	1	1	2	1	0	0	4	NA	0	0	0
421	2	1	6	1	1.58	80	0	4	2	NA	3	1	0	0	0	0	1	0	0	0	0	1	0	0	0	0	1	0	0	3	0	0	0	0
422	1	1	6	1	1.7	70	2	2	2	7	3	1	0	0	0	0	1	0	0	0	0	0	0	1	3	2	1	0	0	4	0	0	0	0
423	2	NA	6	1	1.6	50	0	2	2	7	2	0	0	0	0	0	1	0	0	0	0	0	0	1	6	0	1	0	0	3	0	0	0	0
424	1	1	6	1	1.7	70	0	2	2	7	3	1	0	0	0	0	1	0	0	0	0	0	0	1	3	2	1	0	0	4	0	0	0	0
425	1	1	6	1	1.6	85	1	4	2	7	1	0	0	0	0	0	1	0	0	0	0	1	1	1	3	2	1	0	0	4	0	0	0	0
426	2	1	6	1	1.5	60	0	2	2	2	4	1	4	5	3	2	1	0	1	0	0	0	0	1	6	0	1	1	0	4	0	0	0	0
427	2	1	6	1	1.6	65	1	4	2	7	2	0	4	0	0	1	1	1	1	0	0	1	1	1	6	0	1	0	0	3	0	0	0	1
428	2	1	6	1	1.55	50	0	4	2	7	2	0	0	0	0	0	0	0	0	0	0	1	0	0	0	0	1	0	0	4	0	0	0	0
429	2	1	6	1	1.55	65	0	2	2	7	2	0	0	0	0	0	0	0	0	0	0	0	0	0	0	0	1	0	0	4	0	0	0	0
430	2	1	6	1	1.6	65	0	4	2	7	2	0	2	0	1	1	1	0	0	0	0	1	1	1	3	2	1	0	0	4	0	0	0	0
431	2	NA	6	1	1.5	50	0	4	2	7	3	1	0	0	0	0	0	0	1	0	0	0	0	1	6	0	1	0	0	2	0	0	0	0
432	1	NA	6	1	1.7	55	2	4	2	1	1	0	0	0	0	0	0	0	0	0	0	NA	0	NA	0	0	1	0	0	4	0	0	0	0
433	2	1	6	1	1.65	45	4	4	2	7	0	0	0	0	0	0	0	0	0	0	0	0	0	0	0	0	1	0	0	4	0	0	0	0
434	2	1	6	1	1.6	65	2	4	2	7	1	0	0	0	0	0	0	0	0	0	0	0	0	0	0	0	1	0	0	4	0	0	0	0
435	1	1	6	1	1.65	66.5	1	2	2	7	1	0	0	0	0	0	0	0	0	0	0	0	0	0	0	0	1	0	0	3	0	0	0	0
436	1	1	6	1	1.77	55	3	4	2	7	0	0	0	0	0	0	0	0		0	0	0	0	0	0	0	1	0	0	4	0	0	0	0
437	1	NA	6	1	1.7	60	1	2	2	7	0	0	0	0	0	0	1	1	0	0	0	0	0	1	3	2	1	0	0	4	0	0	0	0
438	1	1	6	1	1.65	80	1	2	2	7	2	0	0	0	0	0	0	0	0	0	0	1	0	0	0	0	1	0	0	4	0	0	0	0
439	2	1	6	1	1.54	50	0	4	2	7	1	0	0	0	0	0	1	0	1	0	0	1	2	1	3	2	1	0	0	4	0	0	0	0
440	2	1	6	1	1.76	80	5	2	2	7	2	0	0	0	0	0	0	0	1	0	0	0	0	0	0	0	1	0	0	4	0	0	0	0
441	1	1	6	1	1.7	50	2	2	2	7	3	1	0	0	0	0	1	0	0	0	0	0	0	1	3	2	1	0	0	4	0	0	0	0
442	2	1	6	1	1.5	68	4	2	2	7	3	1	1	0	0	1	0	0	0	0	0	1	0	0	0	0	1	0	0	4	0	0	0	0
443	1	1	6	1	1.6	66	3	2	2	7	1	0	0	0	0	0	1	1	0	1	0	0	0	1	5	2	1	0	0	4	0	0	0	0
444	1	1	6	1	1.65	72	3	4	2	7	2	0	0	0	0	0	1	0	0	0	0	0	0	0	0	0	1	0	0	4	0	0	0	0
445	1	1	6	1	1.74	70	2	2	2	7	3	1	0	0	0	0	1	0	0	0	0	0	0	1	3	2	1	0	0	4	0	0	0	0
446	2	1	6	1	1.55	55	0	2	2	7	2	0	0	0	0	0	1	0	0	0	0	1	1	1	3	2	1	0	0	3	0	0	0	0
447	1	1	6	1	1.75	65	3	4	2	7	0	0	0	0	0	0	0	0	0	0	0	0	0	0	0	0	1	0	0	4	0	0	0	0
448	2	NA	6	1	1.6	72	0	4	2	7	1	0	0	0	0	0	0	0	0	0	0	1	0	0	0	0	1	0	0	3	0	0	0	0
449	2	1	6	1	1.56	75	2	2	2	7	3	1	0	8	0	1	1	0	0	0	0	1	0	0	0	0	1	0	0	3	0	0	0	0
450	2	1	6	1	1.6	80	0	4	2	7	2	0	1	3	0	1	1	0	1	0	0	0	0	1	3	2	1	0	0	4	0	0	0	0
451	2	NA	6	1	1.59	52	3	4	2	7	0	0	0	0	0	0	0	0	0	0	0	0	0	0	0	0	1	0	0	4	0	0	0	0
452	2	1	6	1	1.6	55	0	4	2	7	2	0	0	0	0	0	1	0	0	1	1	1	2	0	0	0	1	0	0	4	0	0	0	0
453	1	1	6	1	1.68	60	NA	NA	2	7	3	1	1	0	0	1	0	0	0	0	0	0	0	0	0	0	1	0	0	4	0	0	0	0
454	2	NA	NA	0	1.6	70	NA	NA	NA	NA	3	1	1	0	0	1	1	0	0	0	0	0	0	1	5	2	1	0	0	3	NA	0	0	0
455	2	1	1	0	1.6	116	0	4	5	3	3	1	4	0	0	0	0	0	0	0	0	NA	0	NA	0	0	0	0	0	0	NA	0	0	0
456	2	NA	NA	0	1.67	67	NA	NA	NA	NA	1	0	0	0	0	0	0	0	0	0	0	NA	0	NA	0	0	0	0	0	0	NA	0	0	0
457	2	1	1	0	1.6	60	2	2	1	1	2	0	0	0	0	0	1	0	0	0	0	NA	0	NA	0	0	0	0	0	0	0	0	0	0
458	1	NA	NA	0	1.71	80	NA	NA	NA	NA	3	1	0	0	0	0	0	0	0	0	0	NA	0	NA	0	0	0	0	0	0	0	0	0	0
459	2	NA	NA	0	1.5	49	NA	NA	NA	NA	1	0	0	0	0	0	0	0	0	0	0	NA	0	NA	0	0	0	0	0	0	0	0	0	0
460	2	NA	NA	0	1.57	51	NA	NA	NA	NA	2	0	0	0	0	0	0	0	0	0	0	NA	0	NA	0	0	0	0	0	0	0	0	0	0
461	2	NA	NA	0	1.62		NA	NA	NA	NA	2	0	4	0	3	0	0	0	0	0	0	NA	0	NA	0	0	0	0	0	0	NA	0	0	0
462	1	NA	NA	0	1.74	85	NA	NA	NA	NA	0	0	4	0	0	0	0	0	0	0	0	NA	0	NA	0	0	0	0	0	0	0	0	0	0
463	1	NA	NA	0	1.72	60	NA	NA	NA	NA	1	0	0	0	0	0	0	0	0	0	0	NA	0	NA	0	0	0	0	0	0	0	0	0	0
464	1	NA	NA	0	1.65	50	NA	NA	NA	NA	2	0	2	0	0	0	0	0	0	0	0	NA	0	NA	0	0	0	0	0	0	NA	0	0	0
465	1	NA	NA	0	1.74		NA	NA	NA	NA	3	1	4	0	0	0	0	0	0	0	0	NA	0	NA	0	0	0	0	0	0	NA	0	0	0
466	1	NA	NA	0	1.55		NA	NA	NA	NA	3	1	4	0	0	0	0	0	0	0	0	NA	0	NA	0	0	0	0	0	0	NA	0	0	0
467	1	NA	NA	0	1.75	70	NA	NA	NA	NA	3	1	4	0	0	0	0	0	0	0	0	NA	0	NA	0	0	0	0	0	0	NA	0	0	0
468	1	NA	NA	0	1.75	80	NA	NA	NA	NA	0	0	0	0	0	0	0	0	0	0	0	NA	0	NA	0	0	0	0	0	0	0	0	0	0
469	1	NA	NA	0	1.75	62	NA	NA	NA	NA	1	0	0	0	0	0	0	0	0	0	0	NA	0	NA	0	0	0	0	0	0	0	0	0	0
470	1	NA	NA	0	1.7	70	NA	NA	NA	NA	1	0	0	0	0	0	0	0	0	0	0	NA	0	NA	0	0	0	0	0	0	0	0	0	0
471	1	NA	NA	0	1.8	90	NA	NA	NA	NA	2	0	4	0	0	0	0	0	0	0	0	NA	0	NA	0	0	0	0	0	0	NA	0	0	0
472	1	NA	NA	0	1.75		NA	NA	NA	NA	2	0	4	0	0	0	0	0	0	0	0	NA	0	NA	0	0	0	0	0	0	NA	0	0	0
473	1	NA	NA	0	1.73	57	NA	NA	NA	NA	0	0	0	0	0	0	0	0	0	0	0	NA	0	NA	0	0	0	0	0	0	0	0	0	0
474	1	1	2	0	1.7	75	2	2	1	2	1	0	0	0	0	0	0	0	0	1	1	0	0	0	0	0	1	0	4	4	0	0	0	0
475	1	NA	NA	0	1.65		NA	NA	NA	NA	3	1	4	0	0	0	0	0	0	0	0	NA	0	NA	0	0	0	0	0	0	NA	0	0	0
476	2	NA	NA	0	1.65	70	NA	NA	NA	NA	1	0	0	0	0	0	0	0	0	0	0	NA	0	NA	0	0	0	0	0	0	0	0	0	0
478	1	NA	NA	0	1.73	70	NA	NA	NA	NA	0	0	0	0	0	0	0	0	0	0	0	NA	0	NA	0	0	1	0	0	0	0	0	0	0
479	1	NA	NA	0	1.66	90	NA	NA	NA	NA	1	0	0	0	0	0	0	0	0	0	0	NA	0	NA	0	0	0	0	0	0	0	0	0	0
480	2	NA	NA	0	1.53	41	NA	NA	NA	NA	0	0	0	0	0	0	0	0	0	0	0	NA	0	NA	0	0	0	0	0	0	0	0	0	0
481	2	1	1	0	1.5	46	0	4	1	1	3	1	1	2	0	1	1	1	1	1	1	1	1	1	6	0	0	0	2	4	0	0	0	0
482	2	1	1	0	1.6	55	4	4	1	2	2	0	4	0	0	0	0	0	0	0	0	0	0	0	0	0	0	0	0	4	0	0	0	0
483	2	NA	6	0	1.6	60	0	2	5	1	2	0	0	0	0	0	1	1	0	0	0	0	0	1	6	0	0	0	0	4	0	0	0	0
484	1	NA	6	0	1.7	65	1	1	1	NA	3	1	2	0	0	2	1	0	0	0	0	1	2	1	3	2	0	0	6	4	0	0	0	1
485	1	1	1	0	1.72	75	3	2	0	8	1	0	0	0	0	0	1	0		0	0	0	0	0	0	0	0	0	0	3	0	0	0	0
486	1	NA	6	0	1.72	70	1	2	5	1	1	0	0	0	0	0	0	0	1	0	0	0	0	0	0	0	0	0	0	3	0	0	0	0
487	2	1	1	0	1.53	41	0	2	5	2	3	1	1	1	0	1	0	0	0	0	0	0	0	1	6	0	0	0	1	2	0	0	0	1
488	2	1	1	0	1.45	54	1	2	0	8	1	0	0	0	0	0	1	1	0	0	0	NA	0	0	0	0	0	0	3	3	0	0	0	0
489	2	1	1	0	1.7	90	0	2	0	2	1	0	0	0	0	0	1	1	0	0	0	0	0	0	0	0	0	0	1	4	0	0	0	0
490	1	1	1	0	1.65	70	0	4	5	1	0	0	0	0	0	0	0	0	0	0	0	NA	0	NA	0	0	0	0	0	3	0	0	0	0
491	2	1	2	0	1.64	60	2	3	5	2	1	0	0	0	0	0	0	0	0	0	0	1	1	0	0	0	1	0	0	3	0	0	0	0
492	1	1	6	1	1.75	100	2	4	2	7	1	0	0	0	0	0	1	1	1	0	0	1	1	1	3	2	1	0	7	4	0	0	0	0
493	1	1	1	0	1.75	90	3	2	0	8	5	1	3	3	0	0	1	0	0	0	0	1	1	1	4	1	1	0	3	4	0	0	0	0
494	2	1	6	0	1.57	65	2	2	5	2	1	0	0	0	0	0	0	0	1	1	1	0	0	0	0	0	1	0	1	3	0	0	0	0
495	1	1	6	0	1.72	75	1	2	1	1	1	0	0	0	0	0	0	0	0	0	0	0	0	0	0	0	1	0	1	2	0	0	0	0
496	1	1	1	0	1.68	61.5	4	4	0	8	2	0	1	5	0	1	1	1	0	0	0	1	1	1	3	2	1	0	2	4	1	1	1	0
497	2	1	6	0	1.55	56	0	2	0	1	0	0	0	0	0	0	1	1	0	0	0	0	0	0	0	0	1	0	1	3	0	0	0	1
498	1	1	1	0	1.65	70	1	2	0	8	4	1	3	0	2	1	1	1	0	0	0	1	2	1	3	2	1	0	3	4	0	0	0	1
499	2	1	3	0	1.55	80	0	2	0	2	1	0	0	0	0	0	1	1	0	0	0	0	0	0	0	0	1	0	1	3	0	0	0	1
500	1	1	1	0	1.65	65	5	4	0	1	3	1	4	0	0	0	1	1	1	0	0	0	0	0	0	0	1	0	4	4	0	0	0	1
501	1	1	1	0	1.7	90	3	4	0	1	4	1	1	0	0	1	0	0	1	1	1	0	0	0	0	0	1	0	2	4	0	0	0	1
502	2	1	1	0	1.6	68	1	4	1	1	2	0	0	0	0	0	1	0	0	0	0	1	0	0	0	0	1	0	2	3	0	0	0	1
503	1	1	1	0	1.8	90	1	4	1	1	2	0	0	0	3	1	1	1	0	0	0	0	0	0	0	0	1	0	1	3	1	1	1	1
505	2	1	1	0	1.45	44	1	2	5	2	0	0	0	0	0	0	0	0	0	0	0	1	1	0	0	0	1	0	1	4	0	0	0	1
506	2	1	1	0	1.5	64	0	2	5	2	0	0	0	0	0	0	0	0	0	0	0	1	1	1	3	2	1	0	2	4	0	0	0	1
507	2	1	1	0	1.5	70	0	2	0	2	0	0	0	0	0	0	0	0	0	0	0	1	1	0	0	0	1	0	1	4	0	0	0	1
508	2	1	1	0	1.4	59	0	2	5	1	2	0	2	3	3	1	0	0	0	1	0	1	1	0	0	0	1	0	1	4	0	0	0	1
509	2	1	1	0	1.48	71	2	2	0	8	1	0	0	0	0	0	0	0	0	0	0	1	1	0	0	0	1	0	1	3	0	0	0	1
510	2	1	1	0	1.53	41	0	2	5	2	1	0	0	0	0	0	0	0	0	1	1	1	1	0	0	0	1	0	1	3	0	0	0	1
511	2	1	3	0	1.55	46	0	2	5	1	1	0	0	0	0	0	0	0	0	1	1	1	1	0	0	0	1	0	1	3	0	0	0	1
512	2	1	1	0	1.6	61	0	2	1	2	1	0	0	0	0	0	0	0	0	0	0	1	1	0	0	0	1	0	1	4	0	0	0	1
513	1	1	6	0	1.76	60	0	2	5	1	4	1	1	4	3	1	0	0	1	1	1	0	0	0	0	0	1	0	1	3	0	0	0	1
514	2	1	1	0	1.65	85	3	2	0	8	0	0	0	0	0	0	0	0	0	1	0	1	1	0	0	0	1	0	1	3	0	0	0	1
515	2	1	6	0	1.58	40	0	2	0	8	1	0	0	0	0	0	0	0	0	1	1	1	1	0	0	0	1	0	2	3	0	0	0	1
516	1	1	1	0	1.68	65	1	2	5	1	0	0	0	0	0	0	0	0	0	0	0	1	1	0	0	0	1	0	2	3	0	0	0	1
517	1	1	6	0	1.58	55	2	4	2	1	4	1	3	0	3	1	1	1	0	0	0	0	0	1	4	1	1	0	2	4	0	0	0	1
518	1	1	4	0	1.55	70	3	2	0	8	1	0	0	0	0	0	0	0	0	1	0	1	1	0	0	0	1	0	2	4	0	0	0	1
519	2	1	3	0	1.59	72.5	1	2	5	2	1	0	0	0	0	0	0	0	0	1	0	1	1	0	0	0	1	0	1	3	0	0	0	1
520	2	1	2	0	1.58	60	1	4	1	2	3	1	0	5	0	1	0	0	1	0	0	0	0	0	0	0	1	0	6	3	0	0	0	1
521	2	1	6	0	1.56	56	1	2	1	1	2	0	0	3	0	1	0	0	0	1	0	1	1	0	0	0	1	0	1	3	0	0	0	1
522	2	1	2	0	1.58	60	0	2	5	1	0	0	0	0	0	0	0	0	0	0	0	1	1	0	0	0	1	0	6	3	0	0	0	1
523	2	1	6	0	1.5	61	1	4	5	1	1	0	0	0	0	0	0	0	0	1	0	1	0	0	0	0	1	0	4	4	0	0	0	1
524	2	1	6	0	1.58	50	1	4	5	8	4	1	3	0	3	1	1	0	0	0	0	0	0	0	0	0	1	0	1	4	0	0	0	0
525	2	1	6	0	1.6	65	2	2	1	8	0	0	0	0	0	0	0	0	0	0	0	0	0	0	0	0	1	0	1	3	0	0	0	0
526	1	1	6	0	1.68	70	2	2	1	8	0	0	0	0	0	0	0	0	0	0	0	0	0	0	0	0	1	0	1	3	0	0	0	0
527	2	1	2	0	1.62	65	1	4	5	8	2	0	4	0	3	1	1	1	0	0	0	1	1	1	6	0	1	0	1	4	0	0	0	0
528	2	1	2	0	1.6	55	0	4	5	1	2	0	1	0	0	1	1	1	0	0	0	0	0	0	0	0	1	0	1	4	0	0	0	0
529	2	1	2	0	1.64	66	0	4	5	8	1	0	0	0	0		1	1	1	0	0	0	0	0	0	0	1	0	2	4	0	0	0	0
530	2	1	2	0	1.67	60	0	2	0	1	0	0	0	0	0	0	1	1	0	0	0	0	0	1	3	2	1	0	1	4	0	0	0	0
531	1	1	2	0	1.69	75	1	2	1	1	1	0	0	0	0	0	0	0	0	1	1	1	1	0	0	0	1	0	1	4	0	0	0	0
532	2	1	2	0	1.59	41	0	4	1	1	0	0	0	0	0	0	1	0	1	0	0	1	0	1	4	1	1	0	2	4	0	0	0	0
533	2	1	2	0	1.6	60	1	2	1	8	0	0	0	0	0	0	0	0	0	0	0	1	1	0	0	0	1	0	1	3	0	0	0	0
534	1	1	2	0	1.75	92.5	3	2	1	8	0	0	0	0	0	0	0	0	0	0	0	1	1	0	0	0	1	0	1	3	0	0	0	0
535	1	1	1	0	1.6	70	1	2	5	3	1	0	0	0	0	0	1	0	0	0	0	0	0	0	0	0	1	0	2	3	0	0	0	0
536	1	1	6	0	1.65	45	1	4	5	1	2	0	1	0	1	1	0	0	1	0	0	0	0	0	0	0	1	0	1	4	0	0	0	0
537	2	1	6	0	1.63	85	2	2	1	8	1	0	0	0	0	0	0	0	0	1	1	0	0	0	0	0	1	0	2	2	0	0	0	0
538	2	1	1	0	1.47	45	4	4	1	1	1	0	0	0	0	0	0	0	0	0	0	1	1	1	3	2	1	0	0	4	0	0	0	0
539	2	1	6	0	1.62	75	1	2	1	8	3	1	2	0	2	1	1	1	0	0	0	0	0	1	3	2	1	0	3	3	0	0	0	0
540	2	1	6	0	1.5	40	1	2	5	1	3	1	1	0	1	1	0	0	0	1	1	0	0	0	0	0	1	0	2	3	0	0	0	0
542	1	1	6	0	1.69	65	1	2	1	1	0	0	0	0	0	0	0	0	0	0	0	0	0	0	0	0	1	0	0	2	0	0	0	0
543	2	1	6	0	1.58	55	0	2	1	1	2	0	0	0	1	1	0	0	0	1	1	0	0	0	0	0	1	0	1	2	0	0	0	0
544	2	1	6	0	1.6	50	2	2	5	8	4	1	2	2	2	1	0	0	1	1	1	0	0	0	0	0	1	0	7	3	0	0	0	0
545	1	1	6	0	1.78	70	2	2	5	8	0	0	0	0	0	0	0	0	0	0	0	0	0	0	0	0	1	0	1	3	0	0	0	0
546	2	1	6	0	1.6	65	1	2	5	3	2	0	1	0	1	1	0	0	1	0	0	0	0	0	0	0	1	0	0	4	0	0	0	0
547	2	1	6	0	1.6	55	1	4	5	2	3	1	1	0	1	1	0	0	1	1	1	0	0	1	4	1	1	0	1	4	0	0	0	0
548	2	1	1	0	1.6	70	0	4	1	2	4	1	0	0	0	0	1	1	0	0	0	1	1	0	0	0	1	0	2	4	0	0	0	1
549	2	1	1	0	1.8	65	3	2	0	2	1	0	0	0	0	0	0	0	0	1	1	1	0	0	0	0	1	0	0	4	0	0	0	0
550	2	1	1	0	1.55	56	3	2	0	2	3	1	0	0	0	0	0	0	0	0	0	0	0	0	0	0	1	0	0	4	0	0	0	0
552	2	1	2	0	1.63	52	3	4	1	1	0	0	0	0	0	0	1	1	0	1	1	0	0	1	3	2	1	0	2	4	0	0	0	0
554	2	1	4	0	1.5	60	3	4	1	1	2	0	0	0	0	0	0	0	1	0	0	0	0	0	0	0	1	1	0	3	0	0	0	1

## Sheet: 5
SEQN	MMSE	SPPB	Malnutrition	Vision	Hearing	Depression	IC	Gender	Age index	Comorbidity	Marital status	EthnicitEthnicity	RA	Nursing home	FRAIL.S	FRAIL	ADL	VAS	Social support	EQ-5D	Abuse risk	Caregiver supp.I	WLT	RBGE	Occupation	Morse	SAS	HES.Insufficient	ES.Insufficient	Loneliness.S.I	Hobby.S.I	Home safety.S.I	Caregiver depre.S	Caregiver abu.R	Height	Weight	Education
3	1	1	0	0	0	1	3	2	3	2	2	1	2	1	2	0	3	0	0	1	0	0	2	7	17	2	0	0	0	0	0	1	0	0	1.6	65	1
15	0	0	0	0	0	1	1	1	4	4	4	1	3	1	4	1	2	0	0	1	0	1	2	NA	21	3	0	0	0	0	0	1	1	0	1.8	75	2
17	1	0	0	0	0	1	2	2	3	1	4	1	3	1	3	1	4	0	0	1	0	1	2	7	21	1	2	0	0	0	0	1	1	0	1.64	60	2
18	1	0	0	0	0	1	2	2	4	0	4	1	3	1	1	0	0	0	0	0	0	1	2	7	21	0	0	0	0	0	0	1	1	0	1.55	56	0
19	1	0	0	0	0	1	2	2	4	1	4	1	3	1	2	0	4	0	0	1	0	1	2	7	21	1	0	0	0	0	0	1	1	0	1.6	60	0
20	1	0	1	0	0	1	3	1	4	1	2	1	3	1	3	1	2	0	0	1	0	1	2	7	21	2	0	0	0	0	0	1	1	0	1.7	61	2
21	1	0	0	0	2	1	4	2	4	1	2	1	3	1	3	1	2	6	0	1	0	1	2	NA	21	2	0	0	0	0	0	1	1	0	1.58	65	0
22	0	1	0	0	2	1	4	1	4	2	4	1	3	1	1	0	0	0	0	0	0	1	2	7	NA	0	0	0	0	0	0	1	1	0	1.7	55	0
23	1	0	0	0	0	1	2	2	3	1	4	1	3	1	2	0	2	5	0	1	0	1	2	7	21	2	0	0	0	0	0	1	1	0	1.58	62	0
26	1	0	0	0	0	1	2	1	3	2	1	1	6	1	1	0	4	0	0	0	0	1	2	7	21	0	0	0	0	0	0	1	1	0	1.6	70	0
27	0	0	0	0	0	1	1	1	3	3	1	1	6	1	0	0	4	0	0	0	0	1	2	7	7	0	0	0	0	0	0	2	1	0	1.65	60	0
28	1	0	0	0	0	1	2	1	3	3	1	1	6	1	0	0	4	0	0	0	0	1	2	7	21	0	0	0	0	0	0	2	1	0	1.75	65	1
29	0	0	0	0	0	1	1	1	4	4	1	1	6	1	1	0	4	0	0	0	0	1	2	7	21	0	0	0	0	0	0	1	1	0	1.6	80	0
30	1	0	0	0	2	1	4	1	3	3	1	1	6	1	1	0	4	0	0	0	0	1	2	7	21	0	0	0	0	0	0	1	1	0	1.5	60	0
31	1	1	0	0	0	1	3	1	4	5	1	NA	6	1	2	0	0	0	0	0	0	1	2	7	21	0	0	0	0	0	0	2	1	0	1.65	70	1
32	0	0	0	1	2	1	4	1	3	4	1	1	6	1	0	0	0	0	0	0	0	1	2	7	7	0	0	0	0	0	0	1	1	0	1.71	73	2
33	1	0	1	0	2	1	5	1	3	10	1	1	6	1	2	0	0	0	0	0	0	1	2	7	21	0	0	0	0	0	0	1	1	0	1.7	80	0
34	0	0	0	0	0	1	1	1	3	3	1	1	6	1	2	0	0	2	0	1	0	1	2	7	7	1	0	0	0	0	0	1	1	0	1.6	57.5	0
35	0	1	0	0	1	1	3	1	3	5	1	1	6	1	3	1	0	0	0	0	0	1	2	7	21	0	0	0	0	0	0	2	1	0	1.65	60	0
36	0	0	1	2	0	1	4	1	3	4	1	1	6	1	2	0	1	0	0	1	0	1	2	7	7	1	0	0	0	0	0	1	1	0	1.6	65	0
37	0	0	0	0	0	1	1	2	4	6	2	1	1	0	0	0	0	0	0	0	0	1	1	1	10	0	0	0	0	0	0	1	1	0	1.49	61	3
38	1	0	0	0	0	1	2	2	3	4	2	1	1	0	0	0	0	0	0	0	0	1	1	1	14	0	0	0	0	0	0	2	0	0	1.56	73	4
39	0	0	0	1	0	1	2	1	3	0	2	1	1	0	2	0	0	0	NA	1	0	1	5	3	21	1	0	0	0	0	0	1	1	0	1.8	95	2
40	0	0	0	2	2	1	5	1	3	3	2	1	1	0	1	0	0	0	0	1	0	1	1	1	14	0	0	0	0	0	0	2	0	0	1.73	62	3
41	0	0	0	2	1	1	4	2	3	7	4	1	1	0	2	0	0	2	0	1	0	1	1	5	21	1	0	0	0	0	0	2	1	0	1.6	55	0
42	0	1	0	2	1	1	5	2	4	5	2	1	1	0	0	0	0	0	0	0	0	1	1	2	19	0	0	0	0	0	0	1	0	0	1.58	51	3
43	0	0	1	0	0	1	2	1	4	5	2	1	1	0	0	0	0	0	0	0	0	1	1	2	9	0	0	0	0	0	0	2	0	0	1.72	51	5
44	1	1	0	2	0	1	5	2	3	6	2	1	1	0	1	0	0	0	0	0	0	1	1	2	7	0	0	0	0	0	0	2	0	0	1.58	70	1
45	0	0	0	1	1	1	3	1	3	4	2	1	1	0	0	0	0	0	0	0	0	1	1	2	7	0	0	0	0	0	0	NA	0	0	1.63	80	2
46	0	0	0	1	2	1	4	2	4	6	4	1	1	0	2	0	0	2	0	1	0	1	5	2	2	2	0	0	0	0	0	2	0	0	1.47	60	1
47	0	0	0	0	0	0	0	2	3	0	2	1	1	0	1	0	0	0	0	0	0	1	5	3	21	0	0	0	0	0	0	2	1	0	1.66	75	0
48	0	0	0	2	0	1	3	1	4	7	4	1	1	0	3	1	1	8	0	1	0	1	5	2	20	0	0	0	0	0	0	1	0	0	1.66	135	5
49	0	0	0	0	0	1	1	1	4	7	2	1	1	0	0	0	0	0	0	0	0	1	1	1	10	0	0	0	0	0	0	1	1	0	1.6	65	4
50	0	1	0	0	0	1	2	2	3	1	4	1	1	0	2	0	0	0	1	1	1	1	5	2	21	0	0	0	1	1	1	1	1	1	1.65	75	1
51	0	0	0	1	2	1	4	2	4	4	2	1	1	0	1	0	0	0	0	0	0	1	1	1	17	0	1	0	0	0	0	1	0	0	1.55	67	3
52	0	0	0	0	2	1	3	1	4	4	2	1	1	0	0	0	0	0	0	0	0	1	1	1	10	0	1	0	0	0	0	1	0	0	1.7	65	5
55	0	0	0	0	0	1	1	1	3	1	2	1	1	0	1	0	0	0	0	0	0	1	0	8	17	0	0	0	0	0	0	1	1	0	1.69	64.9	2
57	0	0	0	0	0	1	1	2	3	1	4	1	1	0	2	0	0	1	0	1	0	1	1	2	17	0	0	0	0	0	0	2	1	0	1.57	70.3	2
58	0	0	0	0	0	1	1	1	4	0	2	1	1	0	0	0	0	0	0	0	0	1	5	2	17	0	0	0	0	0	0	1	1	0	1.73	61.3	2
59	1	1	0	0	2	1	5	1	3	0	4	1	1	0	3	1	0	0	0	0	0	1	1	2	17	0	0	0	0	0	0	1	1	0	1.5	62.2	1
60	0	0	0	0	0	1	1	2	3	0	2	1	1	0	1	0	0	0	0	0	0	1	0	2	17	0	0	0	0	0	0	1	1	0	1.59	67	2
61	0	0	0	0	0	1	1	1	3	0	2	1	1	0	0	0	0	0	0	0	0	1	0	2	18	0	0	0	0	0	0	1	1	0	1.7	71	1
62	0	0	0	0	0	1	1	1	3	3	1	1	6	0	3	1	0	0	0	0	0	1	2	7	7	0	0	0	0	0	0	1	1	0	1.65	75	0
63	0	1	0	0	0	1	2	1	3	0	2	1	1	0	0	0	0	0	0	0	0	1	0	8	17	0	0	0	0	0	0	2	1	0	1.65	65	0
64	0	0	1	0	0	1	2	1	3	3	1	1	6	0	3	1	4	3	0	1	0	1	2	7	7	3	0	0	0	0	0	1	1	0	1.7	73	0
66	0	0	0	0	0	1	1	1	4	0	4	1	1	0	1	0	0	0	0	0	0	1	1	1	20	0	0	0	0	0	0	2	0	0	1.66	70	3
67	1	0	0	0	0	1	2	2	4	1	4	1	1	0	2	0	0	0	0	0	0	1	1	2	21	0	0	0	0	0	0	2	1	0	1.6	56	0
68	0	1	1	0	0	1	3	1	3	0	2	1	3	0	0	0	0	0	0	0	0	1	5	1	6	0	0	0	0	0	0	2	1	0	1.67	60	2
69	0	1	0	0	0	1	2	1	4	1	2	1	1	0	2	0	1	0	0	1	0	1	5	1	18	1	0	0	0	0	0	2	1	0	1.7	70	2
70	0	0	0	0	0	1	1	2	4	0	4	1	1	0	0	0	0	0	1	1	0	1	1	1	2	0	0	0	0	1	1	1	1	0	1.68	60	3
71	0	1	0	1	0	1	3	2	3	0	2	1	1	0	1	0	0	0	0	0	0	1	5	1	4	0	0	0	0	0	0	2	1	0	1.5	65	2
72	0	0	0	0	0	1	1	2	4	0	4	1	1	0	0	0	0	0	0	0	0	1	5	2	12	0	0	0	0	0	0	2	1	0	1.55	60	0
73	0	0	1	0	2	1	4	2	4	0	4	1	2	0	1	0	0	0	0	0	0	0	5	2	17	0	0	0	0	0	0	2	0	0	1.6	60	0
75	0	0	0	0	0	1	1	1	4	0	2	NA	1	0	0	0	0	0	0	0	0	0	5	8	17	0	0	0	0	0	0	1	0	0	1.68	67	3
76	0	0	0	0	0	1	1	2	3	0	2	1	1	0	0	0	0	0	0	0	0	0	5	8	20	0	0	0	0	0	0	1	0	0	1.52	64	1
77	0	0	0	0	0	1	1	1	3	0	2	1	1	0	0	0	0	0	0	0	0	0	0	8	21	0	0	0	0	0	0	1	0	0	1.47	60	1
78	0	0	0	0	0	1	1	1	4	0	2	1	1	0	0	0	0	0	0	0	0	0	0	8	16	0	0	0	0	0	0	1	0	0	1.76	60	3
79	0	0	0	0	0	1	1	1	3	1	2	1	1	0	0	0	0	0	0	0	0	1	0	8	17	0	0	0	0	0	0	1	1	0	1.62	74.3	1
80	0	1	1	0	0	1	3	2	4	0	4	1	1	0	0	0	0	0	0	0	0	0	5	2	21	0	0	0	0	0	0	2	0	0	1.55	120	2
81	0	0	0	0	0	1	1	2	4	0	2	1	1	0	0	0	0	0	0	0	0	1	0	5	21	0	0	0	0	0	0	0	1	0	1.55	70.8	1
82	0	0	0	0	0	1	1	2	4	2	2	1	1	0	2	0	0	0	0	0	0	0	0	3	17	0	0	0	0	0	0	1	0	0	1.6	50	0
83	0	0	0	0	0	1	1	1	4	1	2	1	1	0	0	0	0	0	0	0	0	0	0	3	14	0	0	0	0	0	0	2	0	0	1.6	65	3
84	0	0	0	0	0	1	1	2	4	1	4	1	1	0	0	0	0	0	0	0	0	1	5	1	17	0	0	0	0	0	0	1	1	0	1.53	57.3	0
85	0	1	0	0	2	1	4	1	4	1	4	1	3	0	0	0		0	0	0	0	0	1	3	9	0	0	0	0	0	0	1	0	0	1.75	80	2
88	1	1	1	2	1	1	7	2	3	1	4	1	3	0	2	0	1	1	0	1	0	1	5	1	21	3	0	0	0	0	0	1	1	0	1.6	50	0
89	1	0	0	1	0	1	3	2	3	4	2	1	1	0	2	0	0	5	0	1	0	0	5	3	21	2	0	0	0	0	0	2	0	0	1.57	65	1
90	0	0	0	1	0	1	2	1	4	5	2	1	1	0	4	1	1	2	0	1	0	0	5	3	21	2	0	0	0	0	0	2	0	0	1.65	63	1
91	1	0	1	1	2	1	6	2	4	4	4	1	1	0	3	1	0	0	0	0	0	0	1	2	9	0	0	0	0	0	0	2	0	0	1.6	58	4
92	0	0	0	0	0	1	1	1	3	2	3	1	1	0	0	0	0	0	0	0	0	0	1	2	11	0	0	0	0	0	0	1	0	0	1.7	82	3
93	0	0	1	0	0	1	2	2	4	0	4	2	1	0	0	0	0	0	0	0	0	0	1	2	17	0	0	0	0	0	0	1	0	0	1.56	57	2
94	0	1	1	1	1	1	5	1	4	0	2	1	1	0	3	1	1	3	0	1	0	1	5	3	21	2	0	0	0	0	0	1	1	0	1.56	115	2
95	0	1	0	0	0	1	2	1	3	0	2	1	1	0	0	0	0	0	0	0	0	1	0	2	17	0	0	0	0	0	0	1	1	0	1.67	90	2
96	0	1	0	0	0	1	2	2	3	0	2	1	1	0	0	0	0	0	0	0	0	0	0	2	17	0	0	0	0	0	0	1	0	0	1.42	39.5	1
97	0	0	0	0	0	1	1	1	3	0	2	1	1	0	1	0	0	0	0	0	0	1	0	1	17	0	0	0	0	0	0	1	1	0	1.65	96.2	3
98	0	1	0	0	0	1	2	2	3	2	2	1	1	0	3	1	4	3	0	2	0	1	0	1	17	3	0	0	0	0	0	2	1	0	1.52	62.3	2
99	0	0	0	1	0	1	2	2	0	0	2	1	1	0	0	0	0	0	0	0	0	0	0	1	20	0	0	0	0	0	0	2	0	0	1.6	50	3
101	0	0	0	0	0	1	1	1	3	0	2	1	1	0	1	0	0	0	0	0	0	0	1	1	13	0	0	0	0	0	0	1	0	0	1.7	80	2
102	1	0	1	0	0	1	3	1	4	1	2	1	1	0	5	1	0	5	0	2	0	1	3	1	17	3	0	0	0	0	0	2	1	0	1.68	70	2
103	0	0	0	0	0	1	1	2	3	0	2	1	1	0	0	0	0	0	0	0	0	0	1	NA	8	0	0	0	0	0	0	2	0	0	1.55	75	1
104	0	0	0	0	2	1	3	2	3	1	2	1	3	0	1	0	0	0	0	1	0	0	0	2	18	0	0	0	0	0	0	1	0	0	1.52	44	1
105	0	1	1	0	0	1	3	2	3	0	2	1	1	0	4	1	2	0	0	1	0	0	5	1	17	2	0	0	0	0	0	1	0	0	1.62	75	1
106	0	0	1	0	0	1	2	1	3	2	4	1	3	1	3	1	1	0	0	1	0	1	2	7	21	1	0	0	0	0	0	1	1	0	1.63	60	1
107	1	0	1	0	0	1	3	1	4	0	4	1	3	1	2	0	0	0	0	0	0	1	2	NA	NA	0	0	0	0	0	0	1	1	0	1.72	70	1
108	0	1	0	0	1	1	3	1	3	2	4	1	3	1	1	0	0	0	0	0	0	1	2	7	21	0	0	0	0	0	0	1	1	0	1.6	60	0
109	0	1	0	0	1	1	3	1	4	0	4	1	3	1	0	0	0	0	0	0	0	0	2	7	21	0	0	0	0	0	0	1	0	0	1.7	70	1
110	0	0	0	0	0	1	1	1	4	0	2	1	1	0	0	0	0	0	0	0	0	0	0	8	20	0	0	0	0	0	0	1	0	0	1.7	65	5
111	0	0	1	0	0	1	2	1	4	2	2	1	1	0	1	0	0	0	0	0	0	0	5	1	17	0	0	0	0	0	0	2	0	0	1.6	60	2
112	0	0	0	0	0	1	1	2	3	0	2	1	1	0	1	0	0	0	0	0	0	0	0	8	9	0	0	0	0	0	0	1	0	0	1.53	60	2
113	1	0	0	0	1	1	3	2	4	1	4	1	3	1	2	0	4	2	0	1	0	1	2	7	21	0	0	0	0	0	0	1	1	0	1.58	60	0
114	1	0	0	0	1	1	3	1	4	4	4	1	3	1	3	1	4	0	1	1	0	1	2	7	21	1	0	0	1	1	1	1	1	0	1.6	65	0
115	0	0	0	0	0	1	1	2	4	1	4	1	1	0	1	0	0	0	0	0	0	0	1	NA	16	0	0	0	0	0	0	1	0	0	1.55	54	0
116	0	0	0	0	0	1	1	2	3	0	3	1	3	1	2	0	4	0	0	1	0	0	2	7	21	0	0	0	0	0	0	1	0	0	1.6	65	0
117	0	0	0	0	1	1	2	2	4	5	4	1	3	1	2	0	0	0	0	0	0	1	2	7	21	0	0	0	0	0	0	1	1	0	1.55	50	0
118	0	0	0	0	2	1	3	1	4	0	2	1	3	1	0	0	0	0	0	0	0	0	2	7	21	0	0	0	0	0	0	1	0	0	1.68	70	0
119	1	0	0	0	2	1	4	2	3	5	4	1	3	1	2	0	0	0	0	0	0	1	2	7	21	0	0	0	0	0	0	1	1	0	1.48	40	0
120	0	0	0	0	1	1	2	1	4	0	4	1	3	1	0	0	0	0	0	0	0	0	2	7	9	0	0	0	0	0	0	1	0	0	1.7	63	3
121	0	0	0	0	0	1	1	2	4	2	4	1	3	1	0	0	0	0	0	0	0	1	2	7	21	0	0	0	0	0	0	1	1	0	1.55	60	1
123	0	1	0	2	0	1	4	2	4	3	2	1	1	0	4	1	1	2	0	1	0	0	5	1	4	3	0	0	0	0	0	2	0	0	1.5	55	3
124	0	0	0	0	2	1	3	1	4	0	4	1	3	1	2	0	0	0	0	0	0	0	2	7	9	0	0	0	0	0	0	1	0	0	1.65	65	3
125	1	0	0	0	0	1	2	1	3	2	4	1	3	1	2	0	0	0	0	0	0	1	2	7	21	0	0	0	0	0	0	1	1	0	1.77	70	0
126	1	1	0	0	1	1	4	2	4	0	4	1	3	1	2	0	2	0	1	1	1	0	2	7	21	1	0	0	1	1	1	1	0	1	1.55	60	0
127	0	0	0	2	2	1	5	2	4	3	4	1	3	1	2	0	4	0	0	2	0	1	2	7	NA	1	0	0	0	0	0	1	1	0	1.55	50	0
128	1	0	0	0	1	1	3	1	4	0	4	1	3	1	2	0	4	2	1	1	0	0	2	7	NA	0	0	0	1	1	1	1	0	0	1.58	55	3
129	0	0	0	0	0	1	1	2	4	0	4	1	1	0	0	0	0	0	0	0	0	0	1	1	17	0	0	0	0	0	0	1	0	0	1.52	50	0
130	0	0	0	0	0	1	1	2	4	0	2	1	1	0	0	0	0	0	0	0	0	0	5	1	19	0	0	0	0	0	0	1	0	0	1.65	68	3
131	0	0	0	0	0	1	1	1	3	0	2	1	1	0	1	0	0	0	0	0	0	0	0	8	17	0	0	0	0	0	0	1	0	0	1.65	58	2
132	0	0	0	2	0	1	3	2	3	0	2	1	1	0	3	1	0	0	0	0	0	0	0	8	20	0	0	0	0	0	0	1	0	0	1.56	43	2
133	1	0	1	0	2	1	5	1	4	2	2	1	1	0	2	0	0	0	0	0	0	1	5	3	21	0	0	0	0	0	0	1	1	0	1.74	50	2
134	0	0	0	0	2	1	3	1	4	0	2	1	2	0	0	0	0	0	0	0	0	0	1	1	17	0	0	0	0	0	0	2	0	0	1.63	66	1
135	0	0	0	0	0	1	1	2	4	0	2	1	2	0	0	0	0	0	0	0	0	0	1	1	17	0	0	0	0	0	0	2	0	0	1.5	67	1
136	0	0	0	0	2	1	3	1	4	1	2	1	1	0	0	0	0	0	0	0	0	0	5	2	21	0	0	0	0	0	0	2	0	0	1.76	60	4
137	0	1	1	1	1	1	5	2	4	0	4	1	1	0	2	0	1	2	0	1	0	0	1	2	21	3	0	0	0	0	0	2	0	0	1.56	72	1
138	0	0	0	0	0	1	1	1	4	0	4	1	1	0	0	0	0	0	0	0	0	0	5	1	17	0	0	0	0	0	0	1	0	0	1.7	80	1
140	0	0	1	1	0	1	3	2	4	2	4	1	1	0	5	1	4	2	0	1	0	0	5	3	NA	2	0	0	0	0	0	1	0	0	1.75	55	2
141	0	0	0	0	0	1	1	1	4	0	4	1	1	0	0	0	0	0	0	0	0	0	5	1	17	0	0	0	0	0	0	1	0	0	1.7	60	1
142	0	0	0	0	0	1	1	1	4	0	2	1	1	0	0	0	0	0	0	0	0	0	1	1	21	0	0	0	0	0	0	1	0	0	1.68	70	1
143	0	0	0	0	0	1	1	2	4	0	2	1	1	0	1	0	0	0	0	0	0	0	1	1	21	0	0	0	0	0	0	1	0	0	1.53	60	0
144	0	0	0	0	0	1	1	2	3	1	2	1	1	0	0	0	0	0	0	0	0	0	0	8	17	0	0	0	0	0	0	1	0	0	1.63	77	3
145	0	0	0	0	0	1	1	2	4	0	2	1	1	0	0	0	0	0	0	0	0	0	0	8	8	0	0	0	0	0	0	1	0	0	1.52	65	0
146	0	0	0	0	0	0	0	2	4	0	4	NA	NA	0	3	1	0	0	0	0	0	0	5	1	8	0	0	0	0	0	0	1	0	0	1.5	125	1
147	0	0	0	0	0	1	1	2	4	0	2	1	1	0	0	0	0	0	0	0	0	0	0	8	8	0	0	0	0	0	0	1	0	0	1.53	65	0
148	0	0	0	1	1	1	3	2	4	0	2	1	1	0	4	1	2	2	0	1	0	0	0	8	17	2	0	0	0	0	0	1	0	0	1.53	65	1
149	0	0	0	0	0	1	1	2	4	1	4	1	1	0	2	0	1	0	0	1	0	0	5	1	8	2	0	0	0	0	0	1	0	0	1.52	65	0
150	0	0	0	0	0	1	1	2	4	0	2	1	1	0	0	0	0	0	0	0	0	0	5	1	17	0	0	0	0	0	0	2	0	0	1.5	64	1
151	0	0	0	0	0	1	1	2	4	0	4	1	1	0	0	0	0	0	0	0	0	0	1	2	21	0	0	0	0	0	0	2	0	0	1.54	62	0
152	0	0	0	0	0	1	1	1	4	0	4	1	1	0	1	0	0	0	0	0	0	0	1	1	13	0	0	0	0	0	0	1	0	0	1.58	55	0
153	0	0	0	0	2	1	3	1	4	0	2	1	1	0	0	0	0	0	0	0	0	0	5	1	17	0	0	0	0	0	0	1	0	0	1.73	83	1
154	0	0	0	0	0	1	1	1	3	0	4	1	1	0	1	0	0	0	0	0	0	0	5	1	18	0	0	0	0	0	0	1	0	0	1.6	55	0
155	0	0	0	0	0	1	1	2	3	0	2	1	1	0	0	0	0	0	0	0	0	0	1	8	17	0	0	0	0	0	0	1	0	0	1.67	76	1
156	0	0	0	0	0	1	1	1	3	0	3	1	1	0	0	0	0	0	0	0	0	0	1	2	18	0	0	0	0	0	0	1	0	0	1.72	70	0
157	0	0	0	0	0	1	1	2	4	0	2	1	1	0	1	0	0	0	0	0	0	0	5	1	8	0	0	0	0	0	0	0	0	0	1.62	75	0
158	0	0	0	0	0	1	1	2	4	7	4	1	1	0	3	1	1	4	NA	1	0	0	5	2	8	3	0	0	0	0	0	0	0	0	1.5	72	0
159	1	1	0	0	0	1	3	2	0	0	2	1	1	0	2	0	1	0	0	1	0	0	5	1	17	2	0	0	0	0	0	1	0	0	1.53	56	0
160	0	0	0	0	0	1	1	2	3	1	4	1	1	0	0	0	0	0	0	0	0	0	1	1	8	0	0	0	0	0	0	1	0	0	1.53	57	0
161	0	0	0	0	0	1	1	2	3	0	2	1	1	0	1	0	0	0	0	0	0	0	0	8	8	0	0	0	0	0	0	1	0	0	1.5	79	0
163	0	0	0	0	0	1	1	1	4	1	2	1	1	0	1	0	0	0	0	0	0	0	5	1	17	0	0	0	0	0	0	1	0	0	1.6	62	1
164	0	0	0	0	0	1	1	2	3	0	2	1	1	0	0	0	0	0	0	0	0	0	5	8	17	0	0	0	0	0	0	1	0	0	1.58	70.2	1
165	0	0	0	0	0	1	1	1	4	0	2	1	1	0	0	0	0	0	0	0	0	0	5	8	17	0	0	0	0	0	0	1	0	0	1.66	74.5	5
166	0	0	1	0	0	1	2	1	4	0	4	1	1	0	1	0	0	0	0	0	0	0	1	1	17	0	0	0	0	0	0	1	0	0	1.65	60.7	1
167	0	1	0	1	2	1	5	2	4	0	4	1	1	0	0	0	0	0	0	0	0	0	5	1	17	0	0	0	0	0	0	1	0	0	1.5	90	1
168	0	0	0	0	0	0	0	1	0	0	2	1	1	0	1	0	0	0	0	0	0	0	0	2	17	0	0	0	0	0	0	0	0	0	1.82	90	3
169	0	0	0	0	0	0	0	1	3	0	2	1	1	0	1	0	0	0	0	0	0	0	1	2	1	0	0	0	0	0	0	1	0	0	1.82	80	2
172	0	0	0	0	0	0	0	2	0	0	4	1	1	0	0	0	0	0	0	0	0	0	5	1	21	0	0	0	0	0	0	1	0	0	1.58	58	0
173	0	1	0	0	0	0	1	2	0	0	4	1	1	0	2	0	0	0	0	0	0	0	1	2	NA	0	0	0	0	0	0	0	0	0	1.55	36	NA
174	0	0	1	0	0	1	2	2	4	2	4	1	1	0	2	0	0	3	1	0	1	0	5	1	21	2	0	0	1	1	1	1	0	1	1.55	52	0
175	0	0	0	0	0	1	1	1	3	1	2	1	3	0	1	0	0	0	0	0	0	0	1	1	1	0	0	0	0	0	0	2	0	0	1.7	65	2
176	0	0	0	0	2	1	3	2	3	0	4	1	1	0	0	0	0	0	0	0	0	0	1	2	18	0	0	0	0	0	0	2	0	0	1.6	72	2
177	0	0	1	0	0	1	2	1	3	3	4	1	3	0	1	0	0	0	0	1	0	0	1	1	2	1	0	0	0	0	0	2	0	0	1.65	55	2
178	0	1	0	0	2	1	4	1	4	1	4	1	3	1	0	0	0	0	0	0	0	0	2	7	21	0	0	0	0	0	0	0	0	0	1.57	60	0
179	1	0	0	2	0	1	4	1	4	1	4	1	3	1	2	0	4	0	1	1	0	0	2	7	21	2	0	0	1	1	1	0	0	0	1.54	70	1
180	0	0	0	0	1	1	2	2	4	1	4	1	3	1	2	0	0	0	0	0	0	0	2	7	21	0	0	0	0	0	0	0	0	0	1.5	75	0
181	1	0	0	0	0	1	2	2	3	4	2	1	3	1	2	0	0	0	0	0	0	0	2	7	21	0	0	0	0	0	0	0	0	0	1.6	75	0
182	0	1	0	0	1	1	3	1	3	2	4	1	3	1	2	0	0	0	0	0	0	0	2	7	21	0	0	0	0	0	0	0	0	0	1.54	55	1
183	0	1	1	2	2	1	7	2	4	8	2	1	1	0	4	1	2	3	0	1	0	0	2	1	17	3	0	0	0	0	0	2	0	0	1.56	45	0
184	1	0	1	0	0	1	3	1	3	2	4	1	3	1	4	1	4	5	1	2	0	0	2	7	21	2	0	0	1	1	1	0	0	0	1.4	50	1
185	0	0	0	0	2	1	3	1	4	0	2	1	1	0	0	0	0	0	0	0	0	0	0	8	17	0	0	0	0	0	0	1	0	0	1.73	70	1
186	0	0	0	0	0	1	1	2	4	0	2	1	1	0	1	0	0	0	0	0	0	0	0	1	17	0	0	0	0	0	0	1	0	0	1.62	68	1
187	1	0	0	0	0	1	2	1	3	0	1	1	3	1	0	0	0	0	0	0	0	0	2	7	21	0	0	0	0	0	0	0	0	0	1.57	52	0
188	0	0	0	0	0	1	1	1	3	0	2	1	3	0	1	0	0	0	0	0	0	0	0	1	21	0	0	0	0	0	0	0	0	0	1.58	53	1
189	0	0	0	0	0	1	1	2	3	0	2	1	3	0	1	0	0	0	0	0	0	0	0	1	21	0	0	0	0	0	0	0	0	0	1.5	55	0
190	1	0	0	0	0	1	2	2	4	0	4	1	3	1	3	1	3	5	1	2	0	0	2	7	21	2	0	0	1	1	1	0	0	0	1.58	45	0
191	0	1	0	2	2	1	6	2	4	0	4	1	3	1	2	0	0	0	0	0	0	0	2	7	NA	0	0	0	0	0	0	0	0	0	1.4	74	0
192	1	1	0	0	0	1	3	1	4	0	4	1	3	1	2	0	0	0	0	0	0	0	2	7	NA	0	0	0	0	0	0	0	0	0	1.58	51	1
193	0	1	0	0	0	1	2	1	3	0	4	1	3	1	2	0	0	0	0	0	0	0	2	7	NA	0	0	0	0	0	0	0	0	0	1.6	72	0
194	1	0	1	1	1	1	5	1	3	1	4	NA	3	1	1	0	0	0	0	0	0	0	2	7	NA	0	0	0	0	0	0	0	0	0	1.52	64	1
195	0	1	0	2	0	1	4	1	4	0	4	1	3	1	0	0	0	0	0	0	0	0	2	7	NA	0	0	0	0	0	0	0	0	0	1.66	68	1
196	1	0	0	0	0	1	2	2	4	0	4	1	3	1	0	0	0	0	0	0	0	0	2	7	NA	0	0	0	0	0	0	0	0	0	1.52	56	0
197	0	1	0	0	0	1	2	2	3	1	4	1	3	1	2	0	0	0	0	0	0	0	2	7	NA	0	0	0	0	0	0	0	0	0	1.4	50	2
198	0	1	0	0	0	1	2	1	3	1	4	1	3	1	0	0	0	0	0	0	0	0	2	7	NA	0	0	0	0	0	0	0	0	0	1.58	67	1
199	0	0	0	0	0	1	1	1	3	4	2	1	6	0	2	0	0	0	0	1	0	0	0	3	21	1	0	0	0	0	0	1	0	0	1.7	70	3
200	0	0	0	0	2	1	3	2	4	4	4	1	6	0	1	0	0	0	0	0	0	0	5	1	NA	0	0	0	0	0	0	1	0	0	1.6	65	1
201	0	0	0	0	0	1	1	1	3	0	2	1	1	0	0	0	0	0	0	0	0	0	0	2	10	0	0	0	0	0	0	1	0	0	1.73	76	2
202	0	0	0	2	0	1	3	2	0	0	4	1	1	0	3	1	1	10	NA	2	0	0	5	1	17	3	1	0	0	0	0	0	0	0	1.56	55	1
203	0	0	0	0	0	1	1	1	4	5	2	1	1	0	0	0	0	0	0	0	0	0	1	1	10	0	0	0	0	0	0	1	0	0	1.6	58	5
204	1	0	0	2	1	1	5	2	4	4	4	1	2	0	3	1	2	5	0	2	0	0	1	2	7	3	1	0	0	0	0	2	0	0	1.37	42.5	0
205	0	1	0	1	2	1	5	2	4	1	4	1	1	0	2	0	1	3	0	1	0	0	1	2	4	1	0	0	0	0	0	2	0	0	1.64	68	3
206	0	0	0	0	0	1	1	2	4	5	2	1	2	0	2	0	0	0	0	0	0	1	1	2	19	0	0	0	0	0	0	2	1	0	1.53	32	5
207	0	1	0	1	0	1	3	1	4	6	2	1	1	0	1	0	1	0	0	1	0	0	5	1	13	1	0	0	0	0	0	1	0	0	1.7	70	3
208	0	1	1	1	0	1	4	2	3	3	4	1	2	0	2	0	0	2	0	1	0	0	1	2	21	1	0	0	0	0	0	2	0	0	1.62	55	0
209		0	1	0	2	1	4	2	4	5	2	1	1	0	2	0	0	2	1	1	1	1	1	2	4	0	0	0	0	1	1	1	1	1	1.5	70	3
210	0	0	0	0	0	1	1	2	3	3	2	1	1	0	4	1	4	3	0	2	0	1	1	2	9	3	0	0	0	0	0	2	1	0	1.55	80	4
211	0	0	0	0	0	1	1	1	4	5	2	1	1	0	1	0	0	0	0	0	0	1	1	2	20	0	0	0	0	0	0	2	1	0	1.65	70	5
212	0	0	0	0	0	1	1	2	3	3	2	1	1	0	0	0	0	0	0	0	0	0	1	2	9	0	0	0	0	0	0	2	0	0	1.6	60	4
215	0	1	0	2	2	1	6	1	4	6	2	1	1	0	3	1	1	0	1	1	1	1	1	2	21	0	0	1	1	1	1	1	1	1	1.8	70	1
216	1	0	1	2	2	1	7	2	4	7	2	1	1	0	5	1	4	9	1	2	1	1	5	2	21	3	0	0	0	1	1	1	1	1	1.6	70	0
218	0	0	0	0	0	1	1	1	3	3	2	1	1	0	0	0	0	0	0	0	0	0	1	2	14	0	0	0	0	0	0	1	0	0	1.8	85	3
219	0	0	0	1	2	1	4	1	4	4	2	1	1	0	0	0	0	0	0	0	0	0	0	1	14	0	0	0	0	0	0	2	0	0	1.74	65	4
220	0	0	0	0	0	0	0	1	4	4	2	1	1	0	0	0	0	0	0	0	0	0	0	1	21	0	0	0	0	0	0	2	0	0	1.68	70	4
221	0	0	1	0	0	1	2	2	3	4	2	1	1	0	1	0	0	0	0	0	0	0	0	1	17	0	0	0	0	0	0	2	0	0	1.63	55	3
222	0	0	0	0	0	0	0	1	4	4	2	1	1	0	0	0	0	0	0	0	0	0	0	1	2	0	0	0	0	0	0	2	0	0	1.76	73	1
223	0	0	0	0	0	0	0	2	4	4	2	1	1	0	1	0	0	0	0	0	0	0	0	1	17	0	0	0	0	0	0	2	0	0	1.6	65	0
224	0	1		0	0	0	1	2	0	0	2	1	1	0	4	1	1	5	NA	1	0	0	5	1	21	3	0	0	0	0	0	0	0	0	1.68	60	3
225	1	0	1	0	0	1	3	2	4	4	2	1	1	0	2	0	1	1	0	1	0	0	5	2	17	1	2	0	0	0	0	1	0	0	1.6	50	2
226	1	1	0	0	0	1	3	1	4	1	4	1	2	0	3	1	1	0	0	1	0	0	5	1	21	2	0	0	0	0	0	1	0	0	1.68	50	0
228	0	1	0	0	2	1	4	1	4	7	2	1	1	0	1	0	0	0	0	1	0	0	3	2	14	3	0	0	0	0	0	1	0	0	1.74	140	4
229	1	1	0	0	1	1	4	2	4	6	2	1	1	0	3	1	0	0	0	0	0	0	1	2	17	0	0	0	0	0	0	2	0	0	1.57	51	2
230	1	1	0	1	2	1	6	1	4	5	4	1	1	0	2	0	1	0	0	1	0	1	5	1	20	1	0	0	0	0	0	1	1	0	1.7	75	5
231	1	1	0	0	2	1	5	2	4	4	2	1	1	0	2	0	1	0	0	1	0	0	5	2	17	1	0	0	0	0	0	1	0	0	1.6	50	2
232	0	1	0	0	1	1	3	1	4	3	2	1	1	0	3	1	1	0	0	1	0	0	5	1	2	2	0	0	0	0	0	1	0	0	1.65	60	2
233	0	0	1	1	0	1	3	1	4	1	2	1	1	0	3	1	1	0	1	1	0	0	1	2	20	2	0	0	0	1	1	2	0	0	1.65	69	2
234	1	0	0	0	0	1	2	2	3	0	2	1	1	0	0	0	0	0	0	0	0	0	5	1	17	0	0	0	0	0	0	1	0	0	1.48	55	2
236	0	0	0	0	0	1	1	1	3	1	2	1	1	0	2	0	0	0	0	0	0	1	5	1	18	0	0	0	0	0	0	1	1	0	1.7	65	1
237	0	1	0	0	0	1	2	2	4	0	4	1	2	0	3	1	1	0	0	0	0	1	1	3	21	0	0	0	0	0	0	1	1	0	1.6	40	0
238	0	1	0	2	2	1	6	1	3	4	2	1	1	0	0	0	0	0	0	0	0	0	5	2	21	0	0	0	0	0	0	2	0	0	1.67	60	0
239	0	1	1	1	0	1	4	1	4	0	4	1	1	0	0	0	0	0	0	0	0	0	1	3	17	0	0	0	0	0	0	1	0	0	1.75	85	1
240	0	0	1	0	0	1	2	1	4	0	4	1	1	0	1	0	1	0	0	1	0	0	1	3	21	2	0	0	0	0	0	2	0	0	1.72	71	2
241	0	0	0	1	0	1	2	2	4	0	4	1	1	0	0	0	0	0	0	0	0	0	1	2	17	0	0	0	0	0	0	2	0	0	1.55	41	1
242	0	1	0	0	0	1	2	2	4	1	4	1	1	0	3	1	0	0	0	0	0	0	1	2	21	0	0	0	0	0	0	0	0	0	1.5	45	0
243	0	0	0	2	0	1	3	2	3	1	2	1	2	1	0	0	0	0	0	0	0	0	2	7	19	0	0	0	0	0	0	1	0	0	1.55	50	2
244	0	1	0	1	1	1	4	1	3	0	1	1	2	1	0	0	0	0	0	0	0	0	2	8	21	0	0	0	0	0	0	1	0	0	1.7	80	0
245	1	0	0	2	2	1	6	1	3	2	3	1	2	1	0	0	0	0	0	0	0	0	2	7	21	0	0	0	0	0	0	1	0	0	1.7	70	1
246	1	0	0	2	2	1	6	1	4	1	4	1	2	1	0	0	0	0	0	0	0	0	2	7	21	0	0	0	0	0	0	1	0	0	1.75	70	2
247	1	1	0	1	2	1	6	2	4	2	4	1	2	1	1	0	0	0	0	0	0	0	2	7	13	0	0	0	0	0	0	1	0	0	1.6	90	0
248	0	0	0	0	1	1	2	1	4	1	4	1	2	1	1	0	0	0	0	0	0	0	2	1	21	0	0	0	0	0	0	1	0	0	1.6	60	2
249	0	1	0	1	2	1	5	1	3	3	4	1	2	1	1	0	0	0	0	0	0	0	2	7	21	0	0	0	0	0	0	1	0	0	1.73	70	1
250	0	1	0	0	2	1	4	1	3	0	1	1	2	1	0	0	1	2	1	1	0	0	2	8	13	2	0	0	1	1	1	1	0	0	1.6	80	0
251	1	0	0	0	2	1	4	1	3	4	2	1	2	1	3	1	4	2	0	2	0	0	2	7	17	2	0	0	0	0	0	1	0	0	1.75	70	2
252	0	1	0	1	2	1	5	2	4	0	4	1	2	1	1	0	0	0	0	0	0	0	2	8	17	0	0	0	0	0	0	1	0	0	1.6	60	1
253	0	1	0	0	2	1	4	1	3	3	4	NA	2	1	0	0	0	0	0	0	0	0	2	NA	21	0	0	0	0	0	0	1	0	0	1.75	75	2
254	0	0	0	1	0	1	2	1	4	1	4	1	2	1	0	0	0	0	0	0	0	0	2	7	14	0	0	0	0	0	0	1	0	0	1.68	56	5
255	0	0	0	1	1	1	3	2	4	0	4	1	2	1	1	0	0	0	0	0	0	0	2	8	18	0	0	0	0	0	0	1	0	0	1.57	50	1
256	1	0	0	1	1	1	4	2	4	1	4	1	2	1	0	0	0	0	0	0	0	0	2	7	21	0	0	0	0	0	0	1	0	0	1.65	65	1
257	1	1	0	2	2	1	7	2	4	0	1	1	2	1	2	0	4	2	0	1	0	0	2	7	8	1	0	0	0	0	0	1	0	0	1.5	60	0
258	1	0	0	1	1	1	4	1	4	0	4	1	2	1	0	0	0	0	0	0	0	0	2	7	17	0	0	0	0	0	0	1	0	0	1.74	70	1
259	0	0	0	0	1	1	2	2	3	3	4	1	2	1	2	0	4	5	0	1	0	0	2	1	18	2	0	0	0	0	0	1	0	0	1.55	50	0
260	1	1	0	0	1	1	4	2	3	1	4	1	2	1	0	0	3	0	0	2	0	0	2	7	9	2	0	0	0	0	0	1	0	0	1.6	60	4
261	0	1	0	1	2	1	5	1	3	1	2	1	1	0	0	0	0	0	0	0	0	0	5	2	21	0	0	0	0	0	0	2	0	0	1.67	60	0
262	0	0	0	0	2	1	3	2	4	2	2	1	2	1	0	0	0	0	0	0	0	0	2	7	18	0	0	0	0	0	0	1	0	0	1.63	60	0
263	1	0	0	2	2	1	6	2	4	2	4	1	2	1	2	0	3	2	0	1	0	0	2	7	8	3	0	0	0	0	0	1	0	0	1.6	80	0
264	0	0	0	0	0	1	1	1	4	0	4	1	1	0	0	0	1	0	0	1	0	0	1	3	21	1	0	0	0	0	0	2	0	0	1.72	71	2
265	0	0	0	1	1	1	3	2	4	2	4	1	1	0	2	0	0	0	0	0	0	0	1	2	21	0	0	0	0	0	0	2	0	0	1.65	68	0
266	1	1	0	0	0	1	3	1	4	1	4	1	1	0	1	0	4	0	0	0	0	0	1	2	18	0	0	0	0	0	0	2	0	0	1.75	75	1
267	0	1	0	0	2	1	4	1	4	1	4	1	1	0	1	0	0	0	0	0	0	0	1	2	18	0	0	0	0	0	0	2	0	0	1.75	78	1
268	0	0	0	0	0	0	0	2	0	0	4	1	1	0	2	0	0	0	0	1	0	0	5	1	7	0	0	0	0	0	0	1	0	0	1.5	130	0
269	0	1	0	0	0	1	2	1	3	2	1	1	3	1	2	0	4	5	0	1	0	1	2	7	21	1	0	0	0	0	0	1	1	0	1.6	165	0
270	1	0	0	0	1	1	3	2	4	2	4	1	3	1	2	0	0	0	0	0	0	1	2	7	21	0	0	0	0	0	0	1	1	0	1.6	70	0
271	0	0	0	0	2	1	3	2	4	2	2	1	3	1	0	0	0	0	0	0	0	1	2	7	19	0	0	0	0	0	0	1	1	0	1.5	60	1
272	1	0	0	0	2	1	4	1	4	1	2	1	3	1	2	0	0	0	0	0	0	1	2	NA	9	0	0	0	0	0	0	1	1	0	1.7	85	0
273	1	1	0	0	2	1	5	2	3	2	2	1	3	1	0	0	0	0	0	0	0	1	2	7	21	0	0	0	0	0	0	1	1	0	1.55	70	0
274	0	1	0	0	2	1	4	1	3	1	4	1	3	1	0	0	0	0	0	0	0	1	2	7	21	0	0	0	0	0	0	1	1	0	1.7	75	1
275	1	0	0	0	2	1	4	2	4	7	4	1	2	0	3	1	3	4	1	2	1	1	1	1	17	3	0	0	0	1	1	2	1	1	1.52	75	0
276	0	1	1	0	0	1	3	2	4	10	4	1	1	0	4	1	0	0	0	0	0	0	5	1	7	0	0	0	0	0	0	1	0	0	1.55	60	0
277	0	0	0	1	0	1	2	2	4	1	4	1	2	0	0	0	0	0	0	0	0	0	1	2	17	0	0	0	0	0	0	2	0	0	1.5	52	1
278	0	0	1	0	0	1	2	2	3	7	2	1	1	0	1	0	0	0	0	0	0	0	5	2	17	0	0	0	0	0	0	2	0	0	1.55	38	3
279	1	1	0	0	2	1	5	1	4	4	2	1	1	0	2	0	0	0	0	1	0	0	5	1	14	1	0	0	0	0	0	1	0	0	1.76	65	5
280	0	1	1	0	0	1	3	2	4	7	2	1	1	0	2	0	1	2	0	1	0	0	5	1	2	3	0	0	0	0	0	1	0	0	1.67	70	3
281	0	0	0	0	1	1	2	1	3	3	1	1	1	0	0	0	0	0	0	0	0	0	0	3	17	0	0	0	0	0	0	2	0	0	1.67	65	1
282	0	0	0	0	0	1	1	2	3	3	2	1	1	0	1	0	0	0	0	0	0	0	0	3	17	0	0	0	0	0	0	2	0	0	1.47	62	2
283	0	0	0	0	0	1	1	1	3	3	2	1	6	0	0	0	0	0	0	1	0	0	5	8	21	0	0	0	0	0	0	1	0	0	1.7	72	0
284	0	0	0	1	0	1	2	2	3	0	4	1	2	0	0	0	0	0	0	0	0	0	1	1	21	0	0	0	0	0	0	1	0	0	1.6	80	1
285	0	0	0	1	0	1	2	1	3	6	4	1	2	1	1	0	0	0	0	0	0	0	2	7	17	0	0	0	0	0	0	1	0	0	1.7	70	1
286	0	0	0	1	0	1	2	2	3	1	1	1	2	1	0	0	0	0	0	0	0	0	2	7	21	0	0	0	0	0	0	1	0	0	1.66	70	1
287	0	0	0	1	2	1	4	1	4	2	1	1	2	1	0	0	0	0	0	0	0	0	2	7	21	0	0	0	0	0	0	1	0	0	1.6	60	1
288	0	1	0	1	0	1	3	1	4	4	2	1	2	1	1	0	0	0	0	0	0	0	2	7	20	0	0	0	0	0	0	1	0	0	1.75	70	4
289	0	0	0	0	0	1	1	2	3	1	2	1	2	1	0	0	0	0	0	0	0	0	2	7	19	0	0	0	0	0	0	1	0	0	1.67	65	1
290	0	0	0	0	0	1	1	2	4	1	4	1	2	1	0	0	0	0	0	0	0	0	2	7	17	0	0	0	0	0	0	1	0	0	1.6	70	1
291	0	0	0	0	0	1	1	2	4	0	4	1	2	1	1	0	0	0	0	0	0	0	2	7	NA	0	0	0	0	0	0	1	0	0	1.65	60	1
292	0	0	0	1	0	1	2	2	4	1	4	1	2	1	1	0	0	0	0	0	0	0	2	7	17	0	0	0	0	0	0	1	0	0	1.6	65	2
293	1	0	0	0	2	1	4	2	4	1	4	1	2	1	1	0	0	0	0	0	0	0	2	7	18	0	0	0	0	0	0	1	0	0	1.6	65	1
294	0	0	0	0	0	1	1	2	3	2	1	1	2	1	0	0	0	0	0	0	0	0	2	7	17	0	0	0	0	0	0	1	0	0	1.62	60	1
295	1	0	0	0	1	1	3	2	4	0	4	1	2	1	1	0	0	0	0	0	0	0	2	7	21	0	0	0	0	0	0	0	0	0	1.6	50	0
296	1	0	0	1	0	1	3	2	3	3	4	1	2	1	1	0	0	0	0	0	0	0	2	7	17	0	0	0	0	0	0	1	0	0	1.65	70	1
297	1	0	0	0	0	1	2	1	2	1	3	1	1	1	2	0	0	0	0	0	0	0	2	7	17	0	0	0	0	0	0	1	0	0	1.65	65	1
298	1	0	0	0	0	1	2	2	0	1	4	1	2	1	1	0	0	0	0	0	0	0	0	7	17	0	0	0	0	0	0	1	0	0	1.55	60	1
299	1	0	0	0	1	1	3	1	4	0	2	1	2	1	1	0	0	0	0	0	0	0	2	7	21	0	0	0	0	0	0	1	0	0	1.65	70	1
300	1	1	1	1	2	1	7	1	3	3	1	1	2	1	4	1	1	0	0	2	0	0	2	7	12	3	0	0	0	0	0	1	0	0	1.65	50	0
301	0	0	0	0	0	1	1	2	1	1	3	1	2	1	4	1	3	0	1	1	1	0	2	7	17	1	0	0	0	1	1	1	0	1	1.65	50	1
302	0	0	0	0	0	1	1	2	3	1	3	1	2	1	1	0	0	0	0	0	0	0	2	7	17	0	0	0	0	0	0	1	0	0	1.55	60	1
303	1	1	0	0	2	1	5	1	4	2	2	1	2	1	2	0	4	0	0	0	0	0	2	7	7	0	0	0	0	0	0	1	0	0	1.72	75	1
304	0	1	0	0	0	1	2	1	3	3	2	1	2	1	3	1	4	0	0	0	0	0	2	7	17	0	0	0	0	0	0	1	0	0	1.65	60	1
305	1	0	0	1	2	1	5	2	4	2	4	1	2	1	1	0	0	0	0	0	0	0	2	7	13	0	0	0	0	0	0	1	0	0	1.55	70	1
306	0	0	0	0	0	1	1	1	3	1	2	1	2	1	2	0	0	0	0	0	0	0	2	7	17	0	0	0	0	0	0	1	0	0	1.65	55	1
307	0	0	0	1	0	1	2	2	3	1	4	1	2	1	1	0	0	0	0	0	0	0	2	7	8	0	0	0	0	0	0	1	0	0	1.6	58	0
308	0	0	0	0	0	1	1	2	4	1	4	1	2	1	2	0	0	0	0	0	0	0	2	7	17	0	0	0	0	0	0	1	0	0	1.6	60	1
309	1	0	0	0	0	1	2	2	3	1	4	1	2	1	2	0	0	0	0	0	0	0	2	7	17	0	0	0	0	0	0	1	0	0	1.62	60	1
310	1	0	0	0	2	1	4	2	4	0	4	1	2	1	2	0	0	0	0	0	0	0	2	7	21	0	0	0	0	0	0	1	0	0	1.58	55	0
311	1	0	0	0	0	1	2	2	3	1	2	1	2	1	2	0	0	0	0	0	0	0	2	7	17	0	0	0	0	0	0	1	0	0	1.6	56	1
312	1	0	0	0	1	1	3	2	4	1	4	1	2	1	1	0	0	0	0	0	0	0	2	7	17	0	0	0	0	0	0	1	0	0	1.62	65	0
313	1	0	0	0	0	1	2	2	1	2	4	1	2	1	2	0	0	0	0	0	0	0	2	7	17	0	0	0	0	0	0	1	0	0	1.62	55	1
314	1	0	0	0	2	1	4	1	3	1	4	1	2	1	1	0	4	0	0	0	0	0	2	7	18	0	0	0	0	0	0	1	0	0	1.65	70	1
315	0	0	0	0	0	1	1	1	4	1	4	1	2	1	1	0	0	0	0	0	0	0	2	7	17	0	0	0	0	0	0	1	0	0	1.73	65	1
317	1	0	0	0	2	1	4	1	4	6	4	1	2	1	1	0	0	0	0	0	0	0	2	7	17	0	0	0	0	0	0	1	0	0	1.73	65	1
318	0	1	1	0	0	1	3	2	4	1	4	1	2	1	0	0	0	0	0	0	0	0	2	7	9	0	0	0	0	0	0	1	0	0	1.6	55	4
321	0	0	0	0	0	1	1	1	4	1	2	1	2	1	0	0	0	0	0	0	0	0	2	7	20	0	0	0	0	0	0	1	0	0	1.6	70	3
322	0	0	0	0	2	1	3	1	4	1	4	1	2	1	0	0	0	0	0	0	0	0	2	7	7	0	0	0	0	0	0	1	0	0	1.67	70	0
323	1	0	0	1	1	1	4	1	3	2	2	1	2	1	2	0	4	0	0	1	0	0	2	7	14	3	0	0	0	0	0	1	0	0	1.68	60	5
324	1	1	0	1	1	1	5	1	4	1	2	1	2	1	2	0	3	0	0	1	0	0	2	7	10	3	0	0	0	0	0	1	0	0	1.68	60	3
325	0	0	0	0	0	1	1	1	3	5	4	1	2	1	2	0	3	0	0	1	0	0	2	7	17	3	0	0	0	0	0	1	0	0	1.73	60	2
326	1	0	0	1	0	1	3	2	3	1	4	1	2	1	2	0	4	0	0	1	0	0	2	7	17	3	0	0	0	0	0	1	0	0	1.6	65	0
327	0	0	0	0	1	1	2	1	4	2	4	1	2	1	0	0	0	0	0	0	0	0	2	7	7	0	0	0	0	0	0	1	0	0	1.73	70	0
328	1	0	0	0	0	1	2	2	4	2	4	1	1	1	4	1	4	0	0	2	0	0	2	7	17	2	0	0	0	0	0	1	0	0	1.5	80	0
329	1	1	0	0	2	1	5	1	4	1	4	1	2	1	2	0	3	0	0	1	0	0	2	7	21	3	0	0	0	0	0	1	0	0	1.62	55	0
330	1	0	0	1	2	1	5	1	3	1	4	1	2	1	3	1	3	0	0	1	0	0	2	7	17	3	0	0	0	0	0	1	0	0	1.65	50	1
331	0	0	0	0	2	1	3	2	4	2	4	1	2	1	2	0	3	3	0	2	0	0	2	7	17	2	0	0	0	0	0	1	0	0	1.5	50	0
332	1	0	0	1	2	1	5	2	4	3	2	1	2	1	2	0	3	1	0	1	0	0	2	7	7	3	0	0	0	0	0	1	0	0	1.59	70	0
333	1	0	0	1	2	1	5	1	4	2	2	1	2	1	2	0	3	0	0	1	0	0	2	7	17	3	0	0	0	0	0	1	0	0	1.68	80	1
334	1	0	0	1	2	1	5	2	4	2	4	1	2	1	2	0	4	0	0	1	0	0	2	7	17	3	0	0	0	0	0	1	0	0	1.65	55	2
335	1	0	0	1	2	1	5	2	4	1	4	1	2	1	2	0	4	0	0	1	0	0	2	7	17	3	0	0	0	0	0	1	0	0	1.6	70	0
336	0	1	0	2	2	1	6	2	4	1	4	1	2	1	2	0	2	0	0	1	0	0	2	7	9	3	0	0	0	0	0	1	0	0	1.65	60	3
337	1	0	0	1	1	1	4	2	4	3	4	1	2	1	2	0	3	8	0	1	0	0	2	7	8	3	0	0	0	0	0	1	0	0	1.41	42	1
338	1	0	0	2	2	1	6	2	4	0	4	1	2	1	4	1	4	4	0	2	0	0	2	7	17	2	0	0	0	0	0	1	0	0	1.55	5	0
339	1	0	0	1	1	1	4	2	4	1	4	1	2	1	2	0	4	2	0	2	0	0	2	7	21	3	0	0	0	0	0	1	0	0	1.5	70	0
340	1	0	0	1	0	1	3	2	3	0	4	1	2	1	2	0	4	5	0	2	0	0	2	7	21	2	0	0	0	0	0	1	0	0	1.5	50	0
341	1	0	0	2	2	1	6	1	3	1	2	1	2	1	2	0	2	0	0	1	0	0	2	7	17	3	0	0	0	0	0	1	0	0	1.73	70	1
342	1	1	1	0	1	1	5	1	3	1	3	1	2	1	2	0	0	0	0	0	0	0	2	7	17	0	0	0	0	0	0	1	0	0	1.75	71	1
343	1	0	0	0	2	1	4	1	3	3	4	1	2	1	0	0	4	0	0	0	0	0	2	7	17	0	0	0	0	0	0	1	0	0	1.7	65	1
344	1	0	0	0	2	1	4	2	4	3	4	1	2	1	2	0	0	0	0	0	0	0	0	7	17	0	0	0	0	0	0	1	0	0	1.5	59.5	1
345	1	0	0	0	0	1	2	2	4	0	4	1	2	1	1	0	0	0	0	0	0	0	2	7	17	0	0	0	0	0	0	1	0	0	1.68	150	0
346	0	1	0	2	0	1	4	1	4	0	4	1	2	1	2	0	1	3	0	1	0	0	2	7	14	2	0	0	0	0	0	1	0	0	1.65	70	3
347	0	0	0	0	0	1	1	1	3	4	4	1	2	1	3	1	3	3	0	1	0	0	2	7	16	3	0	0	0	0	0	1	0	0	1.75	76	3
348	0	0	0	0	0	1	1	2	3	3	2	1	1	0	0	0	0	0	0	0	0	0	5	2	7	0	0	0	0	0	0	1	0	0	1.55	57	1
350	0	0	0	1	0	1	2	2	4	5	4	1	2	1	2	0	0	0	0	0	0	0	2	7	17	0	0	0	0	0	0	1	0	0	1.6	65	0
351	1	0	0	0	2	1	4	2	4	1	4	1	2	1	2	0	4	0	0	0	0	0	2	7	9	0	0	0	0	0	0	1	0	0	1.52	50	1
352	1	0	0	2	1	1	5	1	4	2	2	1	2	1	1	0	0	0	0	0	0	0	2	7	17	0	0	0	0	0	0	1	0	0	1.75	130	1
353	0	1	0	0	0	1	2	2	4	1	4	1	2	1	2	0	0	0	0	0	0	1	2	7	17	0	0	0	0	0	0	1	1	0	1.6	120	1
354	0	1	0	0	0	1	2	1	4	1	4	NA	2	1	1	0	0	0	0	0	0	0	2	7	17	0	0	0	0	0	0	1	0	0	1.72	70	0
355	1	0	0	1	0	1	3	1	4	1	4	1	2	1	2	0	3	0	0	1	0	0	2	7	17	3	0	0	0	0	0	1	0	0	1.7	65	2
356	0	1	0	1	2	1	5	2	4	2	4	1	2	1	2	0	1	0	0	1	0	0	2	7	17	2	0	0	0	0	0	1	0	0	1.59	55	1
357	1	0	0	0	0	1	2	2	4	2	4	1	2	1	0	0	4	0	0	0	0	0	2	7	17	0	0	0	0	0	0	1	0	0	1.72	70	1
358	1	0	0	1	0	1	3	1	4	1	4	1	2	1	1	0	0	0	0	0	0	0	2	7	14	0	0	0	0	0	0	1	0	0	1.65	60	2
359	0	0	0	0	0	1	1	1	4	1	4	1	2	1	0	0	0	0	0	1	0	0	2	1	2	2	0	0	0	0	0	1	0	0	1.7	75	3
360	0	0	0	0	0	1	1	2	4	1	4	1	2	1	0	0	1	0	0	1	0	0	2	7	21	2	0	0	0	0	0	1	0	0	1.65	80	2
361	0	0	0	0	0	1	1	1	4	0	2	1	2	1	0	0	0	0	0	0	0	0	2	7	19	0	0	0	0	0	0	1	0	0	1.65	70	3
362	0	0	0	0	0	1	1	2	3	0	2	1	2	1	1	0	0	0	0	0	0	0	2	7	17	0	0	0	0	0	0	1	0	0	1.5	50	1
363	0	1	0	1	1	1	4	1	4	3	2	1	2	1	1	0	0	0	0	0	0	0	2	7	19	0	0	0	0	0	0	1	0	0	1.69	71	2
364	0	0	0	0	0	1	1	2	4	2	2	2	2	1	5	1	4	3	0	2	0	1	2	7	19	2	0	0	0	0	0	1	1	0	1.6	150	2
365	0	0	1	0	0	1	2	2	3	5	2	1	1	0	3	1	0	0	1	1	1	0	1	1	4	2	0	1	0	1	1	2	0	1	1.58	49	3
366	0	1	0	2	0	1	4	1	4	7	2	1	1	0	4	1	1	2	1	1	1	0	1	1	14	2	1	1	1	1	1	2	0	1	1.6	65	3
368	0	0	1	2	0	1	4	1	4	8	2	1	1	0	5	1	3	3	0	2	0	1	1	1	14	3	1	0	0	0	0	2	1	0	1.7	55	3
369	0	1	0	2	0	1	4	2	4	9	4	1	1	0	4	1	2	5	0	1	0	0	1	2	14	3	0	0	0	0	0	2	0	0	1.55	58	1
370	0	0	0	0	0	0	0	2	0	0	4	1	1	0	1	0	0	0	NA	0	0	0	5	3	21	0	0	0	0	0	0	0	0	0	1.56	70	1
371	0	1	1	0	0	1	3	2	4	NA	2	1	1	0	3	1	1	2	0	1	0	0	0	1	17	3	0	0	0	0	0	2	0	0	1.46	78	1
372	0	0	0	0	0	0	0	2	3	0	2	1	1	0	2	0	0	0	0	0	0	0	5	8	21	0	0	0	0	0	0	1	0	0	1.7	160	1
373	0	1	1	1	0	1	4	1	4	7	2	1	1	0	3	1	0	2	0	1	0	0	0	1	14	2	0	0	0	0	0	2	0	0	1.74	72	2
374	0	1	0	0	0	1	2	2	3	4	2	1	1	0	1	0	0	0	0	0	0	0	5	1	21	0	0	0	0	0	0	2	0	0	1.48	53.9	0
375	0	0	0	0	0	1	1	1	3	3	2	1	1	0	0	0	0	0	0		0	0	1	8	21	0	0	0	0	0	0	1	0	0	1.7	80	2
376	1	0	0	1	0	1	3	1	3	4	4	1	1	0	1	0	0	0	0	0	0	0	1	1	2	0	0	0	0	0	0	1	0	0	1.7	90	4
377	0	0	0	0	0	1	1	2	4	5	4	1	1	0	1	0	0	0	0	0	0	0	5	1	21	0	0	0	0	0	0	1	0	0	1.64	63	3
378	0	0	1	0	0	1	2	2	4	4	4	1	1	0	0	0	1	1	0	1	0	0	1	2	21	0	0	0	0	0	0	2	0	0	1.62	70	1
379	0	0	0	0	0	1	1	1	3	3	2	1	1	0	0	0	0	0	0	0	0	0	5	1	17	0	0	0	0	0	0	1	0	0	1.68	72	1
380	0	0	0	0	0	1	1	2	3	3	2	1	1	0	1	0	0	0	0	1	0	0	5	1	17	0	0	0	0	0	0	1	0	0	1.58	70	2
381	0	0	1	1	0	1	3	2	3	0	4	1	2	0	1	0	0	0	0	0	0	0	5	2	17	0	0	0	0	0	0	2	0	0	1.67	73	2
382	0	0	0	0	1	1	2	2	4	6	4	1	1	0	0	0	0	0	0	0	0	0	1	3	17	0	0	0	0	0	0	1	0	0	1.6	62	0
383	0	0	0	0	0	1	1	1	3	0	2	1	2	0	0	0	0	0	0	0	0	0	0	2	2	0	0	0	0	0	0	2	0	0	1.7	60	1
384	0	0	0	0	0	1	1	1	3	0	2	1	2	0	0	0	0	0	0	0	0	0	0	8	14	0	0	0	0	0	0	1	0	0	1.84	84	3
385	0	0	0	0	0	1	1	2	3	1	2	1	2	0	0	0	0	0	0	0	0	0	5	8	18	0	0	0	0	0	0	1	0	0	1.63	69	1
386	0	0	0	0	0	1	1	2	4	2	4	1	2	0	0	0	0	0	0	0	0	0	5	1	17	0	0	0	0	0	0	1	0	0	1.58	52	0
387	0	0	0	2	0	1	3	2	3	1	2	1	2	0	3	1	1	2	0	1	0	0	5	1	17	2	0	0	0	0	0	2	0	0	1.6	75.5	0
388	0	0	0	1	0	1	2	1	4	1	2	1	2	0	0	0	0	0	0	0	0	0	5	2	9	0	0	0	0	0	0	1	0	0	1.7	56	3
389	0	0	0	2	0	1	3	1	3	10	2	1	6	1	3	1	2	0	NA	1	0	0	2	7	17	3	0	0	0	0	0	1	0	0	1.65	72	2
390	0	0	0	0	0	1	1	2	4	7	2	1	6	1	2	0	4	0	0	1	0	0	2	7	9	1	0	0	0	0	0	1	0	0	1.6	70	3
391	0	1	0	0	0	1	2	2	3	5	2	1	6	1	3	1	0	0	0	0	0	0	2	NA	21	0	0	0	0	0	0	1	0	0	1.6	80	3
392	0	0	1	0	0	1	2	2	3	3	4	1	6	1	1	0	0	0	0	0	0	0	2	7	17	0	0	0	0	0	0	1	0	0	1.63	80	2
393	0	0	0	0	0	1	1	2	4	4	4	1	6	1	2	0	4	7	1	2	0	0	2	7	21	3	0	0	1	1	1	1	0	0	1.55	72	0
394	0	0	0	0	0	1	1	2	3	3	1	NA	6	1	1	0	0	0	0	0	0	0	2	7	8	0	0	0	0	0	0	1	0	0	1.58	75	1
395	0	0	0	0	0	1	1	2	4	4	2	1	6	1	1	0	0	0	0	0	0	0	2	7	17	0	0	0	0	0	0	1	0	0	1.5	55	0
396	0	0	0	2	0	1	3	2	3	4	4	1	6	1	2	0	0	0	0	0	0	0	2	7	8	0	0	0	0	0	0	1	0	0	1.55	60	0
397	1	1	0	0	2	1	5	2	4	4	4	1	6	1	0	0	0	0	0	0	0	0	2	7	7	0	0	0	0	0	0	1	0	0	1.5	42	1
398	0	0	0	0	0	1	1	2	4	6	2	1	6	1	2	0	0	0	0	0	0	0	2	7	8	0	0	0	0	0	0	1	0	0	1.6	55	0
399	0	0	1	0	1	1	3	2	4	4	4	1	6	1	4	1	4	3	0	1	0	0	2	7	21	2	0	0	0	0	0	1	0	0	1.5	55	0
400	0	0	0	2	0	1	3	1	4	0	2	1	6	1	1	0	0	0	0	0	0	0	2	7	9	0	0	0	0	0	0	1	0	0	1.62	60	3
401	0	0	0	2	0	1	3	2	4	0	2	1	6	1	2	0	0	0	0	0	0	0	2	7	9	0	0	0	0	0	0	1	0	0	1.5	50	1
402	0	1	0	0	0	1	2	2	4	0	4	1	6	1	3	1	2	2	0	1	0	0	2	7	21	2	0	0	0	0	0	1	0	0	1.6	65	0
403	0	0	0	0	0	0	0	2	4	0	4	1	6	1	3	1	4	0	NA	3	0	0	2	7	18	2	0	0	0	0	0	0	0	0	1.65	65	0
404	0	0	0	0	2	1	3	2	4	0	2	NA	6	1	3	1	0	0	0	0	0	0	2	7	8	0	0	0	0	0	0	0	0	0	1.6	50	0
405	1	0	0	1	2	1	5	2	4	0	2	1	6	1	2	0	0	0	0	0	0	0	2	7	21	0	0	0	0	0	0	1	0	0	1.5	55	1
406	0	1	0	0	0	1	2	2	4	0	4	1	6	1	1	0	0	0	0	0	0	0	2	7	8	0	0	0	0	0	0	1	0	0	1.5	48	0
407	0	0	0	0	1	1	2	2	4	0	4	1	6	1	0	0	0	0	0	0	0	0	2	7	21	0	0	0	0	0	0	1	0	0	1.5	45	0
409	0	0	0	0	2	1	3	2	4	0	4	1	6	1	2	0	0	0	0	1	0	0	2	7	8	3	0	0	0	0	0	1	0	0	1.5	70	1
410	0	0	0	0	1	1	2	2	4	0	4	1	6	1	3	1	0	0	0	0	0	0	2	7	7	0	0	0	0	0	0	1	0	0	1.48	47	0
411	0	0	0	0	0	1	1	1	4	0	2	1	6	1	2	0	0	0	0	0	0	0	2	7	20	0	0	0	0	0	0	1	0	0	1.58	50	2
412	0	1	0	0	2	1	4	1	4	0	4	1	6	1	2	0	0	0	0	0	0	0	2	7	17	0	0	0	0	0	0	1	0	0	1.65	70	2
413	0	0	0	0	0	1	1	1	3	0	2	1	6	1	0	0	0	0	0	0	0	0	2	1	21	0	0	0	0	0	0	1	0	0	1.6	60	0
414	1	0	0	0	0	1	2	2	3	0	2	1	6	1	3	1	4	0	0	1	0	1	2	7	21	2	0	0	0	0	0	1	1	0	1.65	80	0
415	0	0	0	0	0	1	1	2	4	0	1	NA	6	1	2	0	0	0	0	0	0	0	2	7	8	0	0	0	0	0	0	0	0	0	1.6	40	0
416	0	0	0	0	0	1	1	2	3	0	2	1	6	1	2	0	0	0	0	0	0	0	2	7	8	0	0	0	0	0	0	1	0	0	1.7	80	0
417	0	0	0	0	0	1	1	2	4	0	4	1	6	1	3	1	0	0	0	0	0	0	2	7	8	0	0	0	0	0	0	1	0	0	1.55	65	0
418	0	0	0	0	1	1	2	2	4	0	4	1	6	1	0	0	0	0	0	0	0	0	2	7	17	0	0	0	0	0	0	1	0	0	1.66	55	5
419	1	1	0	0	2	1	5	2	4	0	4	1	6	1	2	0	0	0	0	1	0	0	2	7	9	2	0	0	0	0	0	1	0	0	1.65	65	2
420	1	0	0	0	2	1	4	2	4	0	4	1	6	1	4	1	2	3	NA	1	0	0	2	7	7	2	0	0	0	0	0	0	0	0	1.6	55	0
421	0	0	0	0	0	1	1	2	3	0	4	1	6	1	3	1	0	0	0	0	0	0	2	NA	8	0	0	0	0	0	0	1	0	0	1.58	80	0
422	0	0	0	0	2	1	3	1	4	0	2	1	6	1	3	1	0	0	0	0	0	0	2	7	13	0	0	0	0	0	0	1	0	0	1.7	70	2
423	0	0	0	0	0	1	1	2	3	0	2	NA	6	1	2	0	0	0	0	0	0	0	2	7	6	0	0	0	0	0	0	2	0	0	1.6	50	0
424	0	0	0	0	2	1	3	1	4	0	2	1	6	1	3	1	0	0	0	0	0	0	2	7	21	0	0	0	0	0	0	1	0	0	1.7	70	0
425	0	0	0	1	2	1	4	1	4	0	4	1	6	1	1	0	0	0	0	0	0	0	2	7	17	0	0	0	0	0	0	1	0	0	1.6	85	1
426	0	1	0	0	0	1	2	2	4	0	2	1	6	1	4	1	4	5	0	2	0	0	2	2	21	3	1	0	0	0	0	1	0	0	1.5	60	0
427	1	1	0	1	0	1	4	2	3	0	4	1	6	1	2	0	4	0	0	1	0	1	2	7	21	1	0	0	0	0	0	1	1	0	1.6	65	1
428	0	0	0	0	0	1	1	2	4	0	4	1	6	1	2	0	0	0	0	0	0	0	2	7	8	0	0	0	0	0	0	1	0	0	1.55	50	0
429	0	0	0	0	0	1	1	2	4	0	2	1	6	1	2	0	0	0	0	0	0	0	2	7	8	0	0	0	0	0	0	0	0	0	1.55	65	0
430	0	0	0	1	2	1	4	2	4	0	4	1	6	1	2	0	2	0	0	1	0	0	2	7	8	2	0	0	0	0	0	1	0	0	1.6	65	0
431	0	1	0	0	0	1	2	2	2	0	4	NA	6	1	3	1	0	0	0	0	0	0	2	7	21	0	0	0	0	0	0	1	0	0	1.5	50	0
432	0	0	0	0	0	1	1	1	4	0	4	NA	6	1	1	0	0	0	0	0	0	0	2	1	19	0	0	0	0	0	0	1	0	0	1.7	55	2
433	0	0	0	0	0	1	1	2	4	0	4	1	6	1	0	0	0	0	0	0	0	0	2	7	2	0	0	0	0	0	0	1	0	0	1.65	45	4
434	0	0	0	0	0	1	1	2	4	0	4	1	6	1	1	0	0	0	0	0	0	0	2	7	4	0	0	0	0	0	0	1	0	0	1.6	65	2
435	0	0	0	0	0	1	1	1	3	0	2	1	6	1	1	0	0	0	0	0	0	0	2	7	21	0	0	0	0	0	0	1	0	0	1.65	66.5	1
436	0		0	0	0	1	1	1	4	0	4	1	6	1	0	0	0	0	0	0	0	0	2	7	9	0	0	0	0	0	0	1	0	0	1.77	55	3
437	1	0	0	0	2	1	4	1	4	0	2	NA	6	1	0	0	0	0	0	0	0	0	2	7	17	0	0	0	0	0	0	1	0	0	1.7	60	1
438	0	0	0	0	0	1	1	1	4	0	2	1	6	1	2	0	0	0	0	0	0	0	2	7	20	0	0	0	0	0	0	1	0	0	1.65	80	1
439	0	1	0	2	2	1	6	2	4	0	4	1	6	1	1	0	0	0	0	0	0	0	2	7	8	0	0	0	0	0	0	0	0	0	1.54	50	0
440	0	1	0	0	0	1	2	2	4	0	2	1	6	1	2	0	0	0	0	0	0	0	2	7	19	0	0	0	0	0	0	1	0	0	1.76	80	5
441	0	0	0	0	2	1	3	1	4	0	2	1	6	1	3	1	0	0	0	0	0	0	2	7	20	0	0	0	0	0	0	1	0	0	1.7	50	2
442	0	0	0	0	0	1	1	2	4	0	2	1	6	1	3	1	1	0	0	1	0	0	2	7	19	2	0	0	0	0	0	1	0	0	1.5	68	4
443	1	0	0	0	2	1	4	1	4	0	2	1	6	1	1	0	0	0	0	0	0	0	2	7	2	0	0	0	0	0	0	1	0	0	1.6	66	3
444	0	0	0	0	0	1	1	1	4	0	4	1	6	1	2	0	0	0	0	0	0	0	2	7	7	0	0	0	0	0	0	1	0	0	1.65	72	3
445	0	0	0	0	2	1	3	1	4	0	2	1	6	1	3	1	0	0	0	0	0	0	2	7	12	0	0	0	0	0	0	1	0	0	1.74	70	2
446	0	0	0	1	2	1	4	2	3	0	2	1	6	1	2	0	0	0	0	0	0	0	2	7	8	0	0	0	0	0	0	1	0	0	1.55	55	0
447	0	0	0	0	0	1	1	1	4	0	4	1	6	1	0	0	0	0	0	0	0	0	2	7	9	0	0	0	0	0	0	1	0	0	1.75	65	3
448	0	0	0	0	0	1	1	2	3	0	4	NA	6	1	1	0	0	0	0	0	0	0	2	7	8	0	0	0	0	0	0	1	0	0	1.6	72	0
449	0	0	0	0	0	1	1	2	3	0	2	1	6	1	3	1	0	8	0	1	0	0	2	7	4	3	0	0	0	0	0	1	0	0	1.56	75	2
450	0	1	0	0	2	1	4	2	4	0	4	1	6	1	2	0	1	3	0	1	0	0	2	7	17	1	0	0	0	0	0	1	0	0	1.6	80	0
451	0	0	0	0	0	1	1	2	4	0	4	NA	6	1	0	0	0	0	0	0	0	0	2	7	9	0	0	0	0	0	0	1	0	0	1.59	52	3
452	0	0	1	2	0	1	4	2	4	0	4	1	6	1	2	0	0	0	0	0	0	0	2	7	16	0	0	0	0	0	0	1	0	0	1.6	55	0
453	0	0	0	0	0	1	1	1	4	0	NA	1	6	1	3	1	1	0	0	1	0	0	2	7	2	2	0	0	0	0	0	1	0	0	1.68	60	NA
454	0	0	0	0	2	1	3	2	3	0	NA	NA	NA	0	3	1	1	0	NA	1	0	0	NA	NA	NA	2	0	0	0	0	0	0	0	0	1.6	70	NA
455	0	0	0	0	0	0	0	2	0	0	4	1	1	0	3	1	4	0	NA	0	0	0	5	3	21	0	0	0	0	0	0	0	0	0	1.6	116	0
456	0	0	0	0	0	0	0	2	0	0	NA	NA	NA	0	1	0	0	0	NA	0	0	0	NA	NA	NA	0	0	0	0	0	0	0	0	0	1.67	67	NA
457	0	0	0	0	0	0	0	2	0	0	2	1	1	0	2	0	0	0	0	0	0	0	1	1	17	0	0	0	0	0	0	0	0	0	1.6	60	2
458	0	0	0	0	0	0	0	1	0	0	NA	NA	NA	0	3	1	0	0	0	0	0	0	NA	NA	NA	0	0	0	0	0	0	0	0	0	1.71	80	NA
459	0	0	0	0	0	0	0	2	0	0	NA	NA	NA	0	1	0	0	0	0	0	0	0	NA	NA	NA	0	0	0	0	0	0	0	0	0	1.5	49	NA
460	0	0	0	0	0	0	0	2	0	0	NA	NA	NA	0	2	0	0	0	0	0	0	0	NA	NA	NA	0	0	0	0	0	0	0	0	0	1.57	51	NA
461	0	0	0	0	0	0	0	2	0	0	NA	NA	NA	0	2	0	4	0	NA	0	0	0	NA	NA	NA	1	0	0	0	0	0	0	0	0	1.62		NA
462	0	0	0	0	0	0	0	1	0	0	NA	NA	NA	0	0	0	4	0	0	0	0	0	NA	NA	NA	0	0	0	0	0	0	0	0	0	1.74	85	NA
463	0	0	0	0	0	0	0	1	0	0	NA	NA	NA	0	1	0	0	0	0	0	0	0	NA	NA	NA	0	0	0	0	0	0	0	0	0	1.72	60	NA
464	0	0	0	0	0	0	0	1	0	0	NA	NA	NA	0	2	0	2	0	NA	0	0	0	NA	NA	NA	0	0	0	0	0	0	0	0	0	1.65	50	NA
465	0	0	0	0	0	0	0	1	0	0	NA	NA	NA	0	3	1	4	0	NA	0	0	0	NA	NA	NA	0	0	0	0	0	0	0	0	0	1.74		NA
466	0	0	0	0	0	0	0	1	0	0	NA	NA	NA	0	3	1	4	0	NA	0	0	0	NA	NA	NA	0	0	0	0	0	0	0	0	0	1.55		NA
467	0	0	0	0	0	0	0	1	0	0	NA	NA	NA	0	3	1	4	0	NA	0	0	0	NA	NA	NA	0	0	0	0	0	0	0	0	0	1.75	70	NA
468	0	0	0	0	0	0	0	1	0	0	NA	NA	NA	0	0	0	0	0	0	0	0	0	NA	NA	NA	0	0	0	0	0	0	0	0	0	1.75	80	NA
469	0	0	0	0	0	0	0	1	0	0	NA	NA	NA	0	1	0	0	0	0	0	0	0	NA	NA	NA	0	0	0	0	0	0	0	0	0	1.75	62	NA
470	0	0	0	0	0	0	0	1	0	0	NA	NA	NA	0	1	0	0	0	0	0	0	0	NA	NA	NA	0	0	0	0	0	0	0	0	0	1.7	70	NA
471	0	0	0	0	0	0	0	1	0	0	NA	NA	NA	0	2	0	4	0	NA	0	0	0	NA	NA	NA	0	0	0	0	0	0	0	0	0	1.8	90	NA
472	0	0	0	0	0	0	0	1	0	0	NA	NA	NA	0	2	0	4	0	NA	0	0	0	NA	NA	NA	0	0	0	0	0	0	0	0	0	1.75		NA
473	0	0	0	0	0	0	0	1	0	0	NA	NA	NA	0	0	0	0	0	0	0	0	0	NA	NA	NA	0	0	0	0	0	0	0	0	0	1.73	57	NA
474	0	0	1	0	0	1	2	1	4	4	2	1	2	0	1	0	0	0	0	0	0	0	1	2	14	0	0	0	0	0	0	2	0	0	1.7	75	2
475	0	0	0	0	0	0	0	1	0	0	NA	NA	NA	0	3	1	4	0	NA	0	0	0	NA	NA	NA	0	0	0	0	0	0	0	0	0	1.65		NA
476	0	0	0	0	0	0	0	2	0	0	NA	NA	NA	0	1	0	0	0	0	0	0	0	NA	NA	NA	0	0	0	0	0	0	0	0	0	1.65	70	NA
478	0	0	0	0	0	1	1	1	0	0	NA	NA	NA	0	0	0	0	0	0	0	0	0	NA	NA	NA	0	0	0	0	0	0	0	0	0	1.73	70	NA
479	0	0	0	0	0	0	0	1	0	0	NA	NA	NA	0	1	0	0	0	0	0	0	0	NA	NA	NA	0	0	0	0	0	0	0	0	0	1.66	90	NA
480	0	0	0	0	0	0	0	2	0	0	NA	NA	NA	0	0	0	0	0	0	0	0	0	NA	NA	NA	0	0	0	0	0	0	0	0	0	1.53	41	NA
481	1	1	1	1	0	0	4	2	4	2	4	1	1	0	3	1	1	2	0	1	0	0	1	1	21	3	0	0	0	0	0	1	0	0	1.5	46	0
482	0	0	0	0	0	0	0	2	4	0	4	1	1	0	2	0	4	0	0	0	0	0	1	2	4	0	0	0	0	0	0	1	0	0	1.6	55	4
483	1	0	0	0	0	0	1	2	4	0	2	NA	6	0	2	0	0	0	0	0	0	0	5	1	8	0	0	0	0	0	0	1	0	0	1.6	60	0
484	0	0	0	2	2	0	4	1	4	6	1	NA	6	0	3	1	2	0	0	2	0	1	1	NA	21	3	0	0	0	0	0	1	1	0	1.7	65	1
485	0		0	0	0	0	0	1	3	0	2	1	1	0	1	0	0	0	0	0	0	0	0	8	14	0	0	0	0	0	0	2	0	0	1.72	75	3
486	0	1	0	0	0	0	1	1	3	0	2	NA	6	0	1	0	0	0	0	0	0	0	5	1	NA	0	0	0	0	0	0	1	0	0	1.72	70	1
487	0	0	0	0	0	0	0	2	2	1	2	1	1	0	3	1	1	1	0	1	0	1	5	2	21	2	0	0	0	0	0	1	1	0	1.53	41	0
488	1	0	0	0	0	0	1	2	3	3	2	1	1	0	1	0	0	0	0	0	0	0	0	8	21	0	0	0	0	0	0	2	0	0	1.45	54	1
489	1	0	0	0	0	0	1	2	4	1	2	1	1	0	1	0	0	0	0	0	0	0	0	2	7	0	0	0	0	0	0	2	0	0	1.7	90	0
490	0	0	0	0	0	0	0	1	3	0	4	1	1	0	0	0	0	0	0	0	0	0	5	1	21	0	0	0	0	0	0	0	0	0	1.65	70	0
491	0	0	0	1	0	1	2	2	3	0	3	1	2	0	1	0	0	0	0	0	0	0	5	2	4	0	0	0	0	0	0	1	0	0	1.64	60	2
492	1	1	0	1	2	1	6	1	4	7	4	1	6	1	1	0	0	0	0	0	0	0	2	7	20	0	0	0	0	0	0	1	0	0	1.75	100	2
493	0	0	0	1	1	1	3	1	4	3	2	1	1	0	5	1	3	3	0	0	0	0	0	8	4	3	0	0	0	0	0	1	0	0	1.75	90	3
494	0	1	1	0	0	1	3	2	3	1	2	1	6	0	1	0	0	0	0	0	0	0	5	2	21	0	0	0	0	0	0	1	0	0	1.57	65	2
495	0	0	0	0	0	1	1	1	2	1	2	1	6	0	1	0	0	0	0	0	0	0	1	1	21	0	0	0	0	0	0	2	0	0	1.72	75	1
496	1	0	0	1	2	1	5	1	4	2	4	1	1	0	2	0	1	5	1	1	1	0	0	8	19	3	0	0	1	1	1	1	0	0	1.68	61.5	4
497	1	0	0	0	0	1	2	2	3	1	2	1	6	0	0	0	0	0	0	0	0	1	0	1	7	0	0	0	0	0	0	2	1	0	1.55	56	0
498	1	0	0	2	2	1	6	1	4	3	2	1	1	0	4	1	3	0	0	1	0	1	0	8	16	3	0	0	0	0	0	1	1	0	1.65	70	1
499	1	0	0	0	0	1	2	2	3	1	2	1	3	0	1	0	0	0	0	0	0	1	0	2	7	0	0	0	0	0	0	2	1	0	1.55	80	0
500	1	1	0	0	0	1	3	1	4	4	4	1	1	0	3	1	4	0	0	0	0	1	0	1	20	0	0	0	0	0	0	1	1	0	1.65	65	5
501	0	1	1	0	0	1	3	1	4	2	4	1	1	0	4	1	1	0	0	1	0	1	0	1	20	3	0	0	0	0	0	1	1	0	1.7	90	3
502	0	0	0	0	0	1	1	2	3	2	4	1	1	0	2	0	0	0	0	0	0	1	1	1	7	0	0	0	0	0	0	1	1	0	1.6	68	1
503	1	0	0	0	0	1	2	1	3	1	4	1	1	0	2	0	0	0	1	1	1	1	1	1	1	2	0	0	1	1	1	2	1	1	1.8	90	1
505	0	0	0	1	0	1	2	2	4	1	2	1	1	0	0	0	0	0	0	0	0	1	5	2	17	0	0	0	0	0	0	2	1	0	1.45	44	1
506	0	0	0	1	2	1	4	2	4	2	2	1	1	0	0	0	0	0	0	0	0	1	5	2	17	0	0	0	0	0	0	1	1	0	1.5	64	0
507	0	0	0	1	0	1	2	2	4	1	2	1	1	0	0	0	0	0	0	0	0	1	0	2	17	0	0	0	0	0	0	1	1	0	1.5	70	0
508	0	0	0	1	0	1	2	2	4	1	2	1	1	0	2	0	2	3	0	1	0	1	5	1	17	3	0	0	0	0	0	1	1	0	1.4	59	0
509	0	0	0	1	0	1	2	2	3	1	2	1	1	0	1	0	0	0	0	0	0	1	0	8	17	0	0	0	0	0	0	1	1	0	1.48	71	2
510	0	0	1	1	0	1	3	2	3	1	2	1	1	0	1	0	0	0	0	0	0	1	5	2	21	0	0	0	0	0	0	1	1	0	1.53	41	0
511	0	0	1	1	0	1	3	2	3	1	2	1	3	0	1	0	0	0	0	0	0	1	5	1	17	0	0	0	0	0	0	1	1	0	1.55	46	0
512	0	0	0	1	0	1	2	2	4	1	2	1	1	0	1	0	0	0	0	0	0	1	1	2	17	0	0	0	0	0	0	1	1	0	1.6	61	0
513	0	1	1	0	0	1	3	1	3	1	2	1	6	0	4	1	1	4	0	1	0	1	5	1	21	3	0	0	0	0	0	1	1	0	1.76	60	0
514	0	0	0	1	0	1	2	2	3	1	2	1	1	0	0	0	0	0	0	0	0	1	0	8	17	0	0	0	0	0	0	1	1	0	1.65	85	3
515	0	0	1	1	0	1	3	2	3	2	2	1	6	0	1	0	0	0	0	0	0	1	0	8	21	0	0	0	0	0	0	1	1	0	1.58	40	0
516	0	0	0	1	0	1	2	1	3	2	2	1	1	0	0	0	0	0	0	0	0	1	5	1	17	0	0	0	0	0	0	1	1	0	1.68	65	1
517	1	0	0	0	1	1	3	1	4	2	4	1	6	0	4	1	3	0	0	1	0	1	2	1	21	3	0	0	0	0	0	2	1	0	1.58	55	2
518	0	0	0	1	0	1	2	1	4	2	2	1	4	0	1	0	0	0	0	0	0	1	0	8	14	0	0	0	0	0	0	1	1	0	1.55	70	3
519	0	0	0	1	0	1	2	2	3	1	2	1	3	0	1	0	0	0	0	0	0	1	5	2	18	0	0	0	0	0	0	1	1	0	1.59	72.5	1
520	0	1	0	0	0	1	2	2	3	6	4	1	2	0	3	1	0	5	0	1	0	1	1	2	17	3	0	0	0	0	0	2	1	0	1.58	60	1
521	0	0	0	1	0	1	2	2	3	1	2	1	6	0	2	0	0	3	0	1	0	1	1	1	17	1	0	0	0	0	0	2	1	0	1.56	56	1
522	0	0	0	1	0	1	2	2	3	6	2	1	2	0	0	0	0	0	0	0	0	1	5	1	17	0	0	0	0	0	0	2	1	0	1.58	60	0
523	0	0	0	0	0	1	1	2	4	4	4	1	6	0	1	0	0	0	0	0	0	1	5	1	4	0	0	0	0	0	0	2	1	0	1.5	61	1
524	0	0	0	0	0	1	1	2	4	1	4	1	6	0	4	1	3	0	0	1	0	0	5	8	21	3	0	0	0	0	0	2	0	0	1.58	50	1
525	0	0	0	0	0	1	1	2	3	1	2	1	6	0	0	0	0	0	0	0	0	0	1	8	21	0	0	0	0	0	0	1	0	0	1.6	65	2
526	0	0	0	0	0	1	1	1	3	1	2	1	6	0	0	0	0	0	0	0	0	0	1	8	21	0	0	0	0	0	0	1	0	0	1.68	70	2
527	1	0	0	1	0	1	3	2	4	1	4	1	2	0	2	0	4	0	0	1	0	0	5	8	1	2	0	0	0	0	0	1	0	0	1.62	65	1
528	1	0	0	0	0	1	2	2	4	1	4	1	2	0	2	0	1	0	0	1	0	0	5	1	17	2	0	0	0	0	0	1	0	0	1.6	55	0
529	1	1	0	0	0	1	3	2	4	2	4	1	2	0	1	0	0	0	0		0	0	5	8	8	0	0	0	0	0	0	1	0	0	1.64	66	0
530	1	0	0	0	2	1	4	2	4	1	2	1	2	0	0	0	0	0	0	0	0	0	0	1	17	0	0	0	0	0	0	1	0	0	1.67	60	0
531	0	0	1	1	0	1	3	1	4	1	2	1	2	0	1	0	0	0	0	0	0	0	1	1	17	0	0	0	0	0	0	1	0	0	1.69	75	1
532	0	1	0	0	1	1	3	2	4	2	4	1	2	0	0	0	0	0	0	0	0	0	1	1	8	0	0	0	0	0	0	1	0	0	1.59	41	0
533	0	0	0	1	0	1	2	2	3	1	2	1	2	0	0	0	0	0	0	0	0	0	1	8	1	0	0	0	0	0	0	1	0	0	1.6	60	1
534	0	0	0	1	0	1	2	1	3	1	2	1	2	0	0	0	0	0	0	0	0	0	1	8	5	0	0	0	0	0	0	1	0	0	1.75	92.5	3
535	0	0	0	0	0	1	1	1	3	2	2	1	1	0	1	0	0	0	0	0	0	0	5	3	18	0	0	0	0	0	0	1	0	0	1.6	70	1
536	0	1	0	0	0	1	2	1	4	1	4	1	6	0	2	0	1	0	0	1	0	0	5	1	21	2	0	0	0	0	0	1	0	0	1.65	45	1
537	0	0	1	0	0	1	2	2	2	2	2	1	6	0	1	0	0	0	0	0	0	0	1	8	21	0	0	0	0	0	0	2	0	0	1.63	85	2
538	0	0	0	1	2	1	4	2	4	0	4	1	1	0	1	0	0	0	0	0	0	0	1	1	4	0	0	0	0	0	0	2	0	0	1.47	45	4
539	1	0	0	0	2	1	4	2	3	3	2	1	6	0	3	1	2	0	0	1	0	0	1	8	21	3	0	0	0	0	0	1	0	0	1.62	75	1
540	0	0	1	0	0	1	2	2	3	2	2	1	6	0	3	1	1	0	0	1	0	0	5	1	21	2	0	0	0	0	0	1	0	0	1.5	40	1
542	0	0	0	0	0	1	1	1	2	0	2	1	6	0	0	0	0	0	0	0	0	0	1	1	21	0	0	0	0	0	0	2	0	0	1.69	65	1
543	0	0	1	0	0	1	2	2	2	1	2	1	6	0	2	0	0	0	0	1	0	0	1	1	21	1	0	0	0	0	0	2	0	0	1.58	55	0
544	0	1	1	0	0	1	3	2	3	7	2	1	6	0	4	1	2	2	0	1	0	0	5	8	21	3	0	0	0	0	0	1	0	0	1.6	50	2
545	0	0	0	0	0	1	1	1	3	1	2	1	6	0	0	0	0	0	0	0	0	0	5	8	21	0	0	0	0	0	0	1	0	0	1.78	70	2
546	0	1	0	0	0	1	2	2	4	0	2	1	6	0	2	0	1	0	0	1	0	0	5	3	21	2	0	0	0	0	0	1	0	0	1.6	65	1
547	0	1	1	0	1	1	4	2	4	1	4	1	6	0	3	1	1	0	0	1	0	0	5	2	21	3	0	0	0	0	0	1	0	0	1.6	55	1
548	1	0	0	1	0	1	3	2	4	2	4	1	1	0	4	1	0	0	0	0	0	1	1	2	18	0	0	0	0	0	0	1	1	0	1.6	70	0
549	0	0	1	0	0	1	2	2	4	0	2	1	1	0	1	0	0	0	0	0	0	0	0	2	9	0	0	0	0	0	0	1	0	0	1.8	65	3
550	0	0	0	0	0	1	1	2	4	0	2	1	1	0	3	1	0	0	0	0	0	0	0	2	19	0	0	0	0	0	0	1	0	0	1.55	56	3
552	1	0	1	0	2	1	5	2	4	2	4	1	2	0	0	0	0	0	0	0	0	0	1	1	19	0	0	0	0	0	0	1	0	0	1.63	52	3
554	0	1	0	0	0	1	2	2	3	0	4	1	4	0	2	0	0	0	0	0	0	1	1	1	7	0	1	0	0	0	0	2	1	0	1.5	60	3

## Sheet: 6
SEQN	IC	FRAIL.S	FRAIL	ADL	SAS	VAS	Morse	Social support	EQ-5D	Abuse risk	Caregiver supp.I	Gender	Age index	Comorbidity	Marital status	EthnicitEthnicity	RA	Nursing home	WLT	RBGE	Occupation	SARC.F	ICI.Q.SF	Sleep	CAS	CAM	SPF	Aspirin	Statins	Metoprolol	Isosorbide mononitrate	CCB	ACEI .ARB	Diuretics	ICS	Metformin	Repaglinide	Glimepiride	Dapagliflozin	Linagliptin	Sacubitril-Valsartan	Omeprazole	Others	Anti.prostatic hyperplasia	N.medicine	Atrial fibrillation	VTE risk	Palliative care	HES.Insufficient
3	3	2	0	3	0	0	2	0	1	0	0	2	3	2	2	1	2	1	2	7	17	1	1	0	0	0	2	1	0	0	0	0	0	0	0	0	0	0	0	0	0	0	0	0	1	NA	0	0	0
15	1	4	1	2	0	0	3	0	1	0	1	1	4	4	4	1	3	1	2	NA	21	1	2	0	2	0	1	1	0	0	0	1	0	0	0	1	0	0	0	0	0	0	0	0	3	0	0	0	0
17	2	3	1	4	2	0	1	0	1	0	1	2	3	1	4	1	3	1	2	7	21	1	3	1	2	0	2	0	0	0	0	0	0	0	0	0	0	0	0	0	0	0	1	0	1	0	0	0	0
18	2	1	0	0	0	0	0	0	0	0	1	2	4	0	4	1	3	1	2	7	21	0	0	0	0	0	0	0	0	0	0	0	0	0	0	0	0	0	0	0	0	0	1	0	1	0	0	0	0
19	2	2	0	4	0	0	1	0	1	0	1	2	4	1	4	1	3	1	2	7	21	1	3	3	0	0	2	0	0	0	0	0	0	0	0	0	0	0	0	0	0	0	1	0	1	0	0	0	0
20	3	3	1	2	0	0	2	0	1	0	1	1	4	1	2	1	3	1	2	7	21	1	1	0	2	0	1	1	0	0	0	1	0	0	0	0	0	0	0	0	0	0	0	0	2	0	0	0	0
21	4	3	1	2	0	6	2	0	1	0	1	2	4	1	2	1	3	1	2	NA	21	1	0	3	0	0	1	0	0	0	0	0	0	0	0	0	0	0	0	0	0	0	1	0	1	0	0	0	0
22	4	1	0	0	0	0	0	0	0	0	1	1	4	2	4	1	3	1	2	7	NA	0	0	0	0	0	0	0	0	0	0	0	0	0	0	0	0	0	0	0	0	0	1	0	1	0	0	0	0
23	2	2	0	2	0	5	2	0	1	0	1	2	3	1	4	1	3	1	2	7	21	1	0	3	2	0	3	0	0	0	0	0	0	0	0	0	0	0	0	0	0	0	1	0	1	0	0	0	0
26	2	1	0	4	0	0	0	0	0	0	1	1	3	2	1	1	6	1	2	7	21	0	0	0	0	0	0	0	0	0	0	0	0	0	0	0	0	0	0	0	0	0	1	0	1	0	0	0	0
27	1	0	0	4	0	0	0	0	0	0	1	1	3	3	1	1	6	1	2	7	7	0	0	0	0	0	0	0	0	0	0	0	0	0	0	0	0	0	0	0	0	0	1	0	1	0	0	0	0
28	2	0	0	4	0	0	0	0	0	0	1	1	3	3	1	1	6	1	2	7	21	0	0	0	0	0	0	0	0	0	0	0	0	0	0	0	0	0	0	0	0	0	1	0	1	0	0	0	0
29	1	1	0	4	0	0	0	0	0	0	1	1	4	4	1	1	6	1	2	7	21	0	0	0	0	0	0	0	0	0	0	0	0	1	0	0	0	0	0	0	0	0	0	0	1	0	0	0	0
30	4	1	0	4	0	0	0	0	0	0	1	1	3	3	1	1	6	1	2	7	21	0	0	0	0	0	0	0	0	0	0	0	0	0	0	0	0	0	0	0	0	0	1	0	1	0	0	0	0
31	3	2	0	0	0	0	0	0	0	0	1	1	4	5	1	NA	6	1	2	7	21	0	0	0	0	0	0	0	0	0	0	0	0	1	0	0	0	0	0	0	0	0	0	0	1	0	0	0	0
32	4	0	0	0	0	0	0	0	0	0	1	1	3	4	1	1	6	1	2	7	7	0	0	0	0	0	0	0	0	0	0	1	0	0	0	0	0	0	0	0	0	0	1	0	2	0	0	0	0
33	5	2	0	0	0	0	0	0	0	0	1	1	3	10	1	1	6	1	2	7	21	0	0	0	0	0	0	0	0	0	0	0	0	0	0	0	0	0	0	0	0	0	1	0	1	0	0	0	0
34	1	2	0	0	0	2	1	0	1	0	1	1	3	3	1	1	6	1	2	7	7	0	1	1	0	0	0	0	0	0	0	0	0	0	0	0	0	0	0	0	0	0	1	0	1	0	0	0	0
35	3	3	1	0	0	0	0	0	0	0	1	1	3	5	1	1	6	1	2	7	21	0	0	0	0	0	0	1	0	0	0	0	0	0	0	0	0	0	0	0	0	0	0	0	1	0	0	0	0
36	4	2	0	1	0	0	1	0	1	0	1	1	3	4	1	1	6	1	2	7	7	0	0	0	0	0	2	0	0	0	0	0	0	0	0	0	0	0	0	0	0	0	1	0	1	0	0	0	0
37	1	0	0	0	0	0	0	0	0	0	1	2	4	6	2	1	1	0	1	1	10	0	0	0	0	0	0	0	1	0	0	0	0	0	0	0	0	0	0	0	0	0	1	0	2	0	0	0	0
38	2	0	0	0	0	0	0	0	0	0	1	2	3	4	2	1	1	0	1	1	14	0	0	0	0	0	0	0	0	1	0	0	0	0	0	0	0	0	0	0	0	1	0	0	2	0	0	0	0
39	2	2	0	0	0	0	1	NA	1	0	1	1	3	0	2	1	1	0	5	3	21	0	0	0	0	0	0	1	0	0	0	1	0	0	0	0	0	0	0	0	0	0	0	0	2	1	0	0	0
40	5	1	0	0	0	0	0	0	1	0	1	1	3	3	2	1	1	0	1	1	14	0	0	0	1	0	0	0	0	0	0	1	0	0	0	0	0	0	0	0	0	0	0	0	1	0	0	0	0
41	4	2	0	0	0	2	1	0	1	0	1	2	3	7	4	1	1	0	1	5	21	0	0	0	1	0	2	1	1	0	0	0	0	0	0	1	1	0	0	0	0	0	0	0	4	0	0	1	0
42	5	0	0	0	0	0	0	0	0	0	1	2	4	5	2	1	1	0	1	2	19	0	0	0	0		0	1	0	1	0	0	0	0	0	1		0	0	0	0	0	0	0	3	NA	0	NA	0
43	2	0	0	0	0	0	0	0	0	0	1	1	4	5	2	1	1	0	1	2	9	0	0	0	0	0	0	0	1	0	0	0	0	0	0	1	0	0	0	0	0	0	0	0	2	0	0	0	0
44	5	1	0	0	0	0	0	0	0	0	1	2	3	6	2	1	1	0	1	2	7	0	0	0	0	0	0	1	0	0	0	0	0	0	0	0	0	0	0	0	0	1	0	0	2	NA	0	1	0
45	3	0	0	0	0	0	0	0	0	0	1	1	3	4	2	1	1	0	1	2	7	0	0	0	0	0	0	1	1	0	0	0	1	0	1	0	0	1	0	0	1	1	0	0	7	0	1	1	0
46	4	2	0	0	0	2	2	0	1	0	1	2	4	6	4	1	1	0	5	2	2	1	2	3	2	0	0	1	0	0	0	0	1	0	0	0	0	0	0	0	0	1	1	0	4	0	0	0	0
47	0	1	0	0	0	0	0	0	0	0	1	2	3	0	2	1	1	0	5	3	21	0	0	0	0	0	0	0	0	0	0	0	0	0	0	0	0	0	0	0	0	0	1	0	1	0	0	0	0
48	3	3	1	1	0	8	0	0	1	0	1	1	4	7	4	1	1	0	5	2	20	0	2	3	2	0	0	0	0	0	0	0	0	0	0	0	0	0	0	0	0	0	1	0	1	0	0	0	0
49	1	0	0	0	0	0	0	0	0	0	1	1	4	7	2	1	1	0	1	1	10	0	0	0	0	0	0	1	0	0	0	0	0	0	0	0	0	0	0	0	0	0	0	0	1	1	1	0	0
50	2	2	0	0	0	0	0	1	1	1	1	2	3	1	4	1	1	0	5	2	21	0	1	1	0	0	0	0	1	0	0	0	0	0	0	1	0	0	0	0	0	0	0	0	2	0	0	0	0
51	4	1	0	0	1	0	0	0	0	0	1	2	4	4	2	1	1	0	1	1	17	0	0	0	0	0	0	0	0	0	0	0	0	0	0	0	0	0	0	0	0	0	1	0	1	0	0	0	0
52	3	0	0	0	1	0	0	0	0	0	1	1	4	4	2	1	1	0	1	1	10	0	0	0	1	0	0	0	0	0	0	0	0	0	0	0	0	0	0	0	0	0	1	0	1	0	0	0	0
55	1	1	0	0	0	0	0	0	0	0	1	1	3	1	2	1	1	0	0	8	17	0	0	0	0	0	0	0	0	0	0	0	1	0	0	0	0	0	0	0	0	0	0	0	1	0	0	0	0
57	1	2	0	0	0	1	0	0	1	0	1	2	3	1	4	1	1	0	1	2	17	0	1	0	0	0	0	0	0	0	0	0	0	0	0	0	0	1	0	0	0	0	0	0	1	0	0	0	0
58	1	0	0	0	0	0	0	0	0	0	1	1	4	0	2	1	1	0	5	2	17	0	0	0	0	0	0	0	0	0	0	0	0	0	0	0	0	0	0	0	0	0	1	0	1	0	0	0	0
59	5	3	1	0	0	0	0	0	0	0	1	1	3	0	4	1	1	0	1	2	17	0	0	0	0	0	0	0	0	0	0	1	1	0	0	0	0	0	0	0	0	0	0	0	2	1	0	0	0
60	1	1	0	0	0	0	0	0	0	0	1	2	3	0	2	1	1	0	0	2	17	0	0	0	0	0	0	0	0	1	0	1	0	0	0	0	0	0	0	0	0	0	0	0	2	0	0	0	0
61	1	0	0	0	0	0	0	0	0	0	1	1	3	0	2	1	1	0	0	2	18	0	0	0	0	0	0	0	0	0	0	0	1	0	0	0	0	0	0	0	0	0	0	0	1	0	0	0	0
62	1	3	1	0	0	0	0	0	0	0	1	1	3	3	1	1	6	0	2	7	7	0	0	0	0	0	0	0	0	0	0	0	0	0	0	0	0	0	0	0	0	0	1	0	1	0	0	0	0
63	2	0	0	0	0	0	0	0	0	0	1	1	3	0	2	1	1	0	0	8	17	0	0	0	0	0	0	0	0	1	0	0	0	0	0	0	1	0	0	0	0	0	0	0	2	0	0	0	0
64	2	3	1	4	0	3	3	0	1	0	1	1	3	3	1	1	6	0	2	7	7	1	0	0	0	0	0	0	0	0	0	0	0	0	0	0	0	0	0	0	0	0	1	0	1	0	0	0	0
66	1	1	0	0	0	0	0	0	0	0	1	1	4	0	4	1	1	0	1	1	20	0	0	0	0	0	0	0	0	0	0	0	1	0	0	0	0	0	0	0	0	0	0	0	1	0	0	0	0
67	2	2	0	0	0	0	0	0	0	0	1	2	4	1	4	1	1	0	1	2	21	0	0	0	0	0	0	0	0	0	0	0	1	0	0	0	0	0	0	0	0	0	0	0	1	0	0	0	0
68	3	0	0	0	0	0	0	0	0	0	1	1	3	0	2	1	3	0	5	1	6	0	0	0	0	0	0	0	0	0	0	0	0	0	0	0	0	0	0	0	0	0	1	0	1	0	0	0	0
69	2	2	0	1	0	0	1	0	1	0	1	1	4	1	2	1	1	0	5	1	18	0	0	0	1	0	3	0	0	0	0	0	0	0	0	1	0	0	0	0	0	0	0	0	1	0	0	0	0
70	1	0	0	0	0	0	0	1	1	0	1	2	4	0	4	1	1	0	1	1	2	0	0	3	1	0	0	0	0	0	0	1	0	0	0	0	0	0	0	0	0	0	0	0	1	0	0	0	0
71	3	1	0	0	0	0	0	0	0	0	1	2	3	0	2	1	1	0	5	1	4	0	0	0	0	0	0	0	0	0	0	0	1	0	0	0	0	0	0	0	0	0	0	0	1	0	0	0	0
72	1	0	0	0	0	0	0	0	0	0	1	2	4	0	4	1	1	0	5	2	12	0	0	0	0	0	0	0	0	0	0	0	1	0	0	0	0	0	0	0	0	0	0	0	1	0	0	0	0
73	4	1	0	0	0	0	0	0	0	0	0	2	4	0	4	1	2	0	5	2	17	0	0	0	0	0	0	0	0	0	0	0	0	0	0	0	0	0	0	0	0	0	1	0	1	0	0	1	0
75	1	0	0	0	0	0	0	0	0	0	0	1	4	0	2	NA	1	0	5	8	17	0	0	0	0	0	0	0	0	0	0	0	0	0	0	0	0	0	0	0	0	0	1	0	1	0	0	0	0
76	1	0	0	0	0	0	0	0	0	0	0	2	3	0	2	1	1	0	5	8	20	0	0	0	0	0	0	0	0	0	0	0	1	0	0	0	0	0	0	0	0	0	0	0	1	0	0	0	0
77	1	0	0	0	0	0	0	0	0	0	0	1	3	0	2	1	1	0	0	8	21	0	0	0	0	0	0	0	0	0	0	0	0	0	0	1	1	0	0	0	0	0	0	0	2	0	0	0	0
78	1	0	0	0	0	0	0	0	0	0	0	1	4	0	2	1	1	0	0	8	16	0	0	0	0	0	0	0	0	0	0	1	1	0	0	0	0	0	0	0	0	0	0	0	2	0	0	0	0
79	1	0	0	0	0	0	0	0	0	0	1	1	3	1	2	1	1	0	0	8	17	0	0	0	0	0	0	0	0	0	0	0	0	0	0	0	0	0	0	0	0	0	0	0	0	0	0	0	0
80	3	0	0	0	0	0	0	0	0	0	0	2	4	0	4	1	1	0	5	2	21	0	0	0	0	0	0	1	0	0	0	0	1	0	0	0	0	0	0	0	0	0	0	0	2	0	0	NA	0
81	1	0	0	0	0	0	0	0	0	0	1	2	4	0	2	1	1	0	0	5	21	0	0	0	0	0	0	0	0	0	0	1	0	0	0	0	0	0	0	0	0	0	0	0	1	0	0	0	0
82	1	2	0	0	0	0	0	0	0	0	0	2	4	2	2	1	1	0	0	3	17	0	0	0	0	0	0	0	0	0	0	0	1	0	0	1	1	1	0	0	0	0	0	0	4	0	0	0	0
83	1	0	0	0	0	0	0	0	0	0	0	1	4	1	2	1	1	0	0	3	14	0	0	0	0	0	0	1	0	0	0	0	1	0	0	1	1	1	0	0	0	0	0	0	5	0	0	0	0
84	1	0	0	0	0	0	0	0	0	0	1	2	4	1	4	1	1	0	5	1	17	0	0	0	0	0	0	0	0	0	0	0	0	0	0	1	0	0	0	0	0	0	0	0	1	0	0	0	0
85	4	0	0		0	0	0	0	0	0	0	1	4	1	4	1	3	0	1	3	9	0	0	0	0	0	0	0	0	0	0	0	0	0	0	0	0	0	0	0	0	0	1	0	1	0	0	0	0
88	7	2	0	1	0	1	3	0	1	0	1	2	3	1	4	1	3	0	5	1	21	0	1	1	2	0	2	1	1	0	0	0	0	0	0	0	0	0	0	0	0	0	0	0	2	0	0	0	0
89	3	2	0	0	0	5	2	0	1	0	0	2	3	4	2	1	1	0	5	3	21	0	0	3	0	0	0	1	1	0	0	0	1	1	0	0	0	0	0	0	0	0	0	0	4	0	0	0	0
90	2	4	1	1	0	2	2	0	1	0	0	1	4	5	2	1	1	0	5	3	21	1	0	1	1	0	0	1	1	1	0	0	1	1	0	0	0	0	1	0	1	0	0	0	7	1	0	0	0
91	6	3	1	0	0	0	0	0	0	0	0	2	4	4	4	1	1	0	1	2	9	0	0	0	0	0	0	0	0	0	0	0	1	0	0	0	0	0	0	0	0	1	0	0	2	0	0	0	0
92	1	0	0	0	0	0	0	0	0	0	0	1	3	2	3	1	1	0	1	2	11	0	0	0	0	0	0	0	1	0	0	0	0	1	0	0	0	0	1	0	1	0	1	0	5	0	0	0	0
93	2	0	0	0	0	0	0	0	0	0	0	2	4	0	4	2	1	0	1	2	17	0	0	0	0	0	0	1	1	0	1	0	0	0	0	0	0	0	0	0	0	0	0	0	3	0	0	0	0
94	5	3	1	1	0	3	2	0	1	0	1	1	4	0	2	1	1	0	5	3	21	1	0	3	1	0	0	1	1	0	0	0	0	0	0	0	0	0	0	0	0	1	0	0	3	0	0	0	0
95	2	0	0	0	0	0	0	0	0	0	1	1	3	0	2	1	1	0	0	2	17	0	0	0	0	0	0	0	0	0	0	0	0	0	0	0	0	0	0	0	0	0	1	0	1	0	0	0	0
96	2	0	0	0	0	0	0	0	0	0	0	2	3	0	2	1	1	0	0	2	17	0	0	0	0	0	0	0	0	0	0	0	0	0	0	0	0	0	0	0	0	0	1	0	1	0	0	NA	0
97	1	1	0	0	0	0	0	0	0	0	1	1	3	0	2	1	1	0	0	1	17	0	0	0	0	0	0	0	0	0	0	0	1	0	0	1	1	0	0	0	0	0	0	0	3	0	0	0	0
98	2	3	1	4	0	3	3	0	2	0	1	2	3	2	2	1	1	0	0	1	17	1	0	0	0	0	3	0	0	0	0	0	0	0	0	0	0	0	0	0	0	0	0	0	0	1	0	0	0
99	2	0	0	0	0	0	0	0	0	0	0	2	0	0	2	1	1	0	0	1	20	0	0	0	0	0	0	1	0	0	0	0	0	0	0	0	0	0	0	0	0	0	0	0	1	NA	0	NA	0
101	1	1	0	0	0	0	0	0	0	0	0	1	3	0	2	1	1	0	1	1	13	0	0	0	0	0	0	0	0	0	0	0	1	0	0	0	0	0	0	0	0	0	0	0	1	0	0	0	0
102	3	5	1	0	0	5	3	0	2	0	1	1	4	1	2	1	1	0	3	1	17	1	2	3	2	0	3	1	0	0	1	0	0	0	0	0	0	0	0	0	0	0	0	0	2	0	0	0	0
103	1	0	0	0	0	0	0	0	0	0	0	2	3	0	2	1	1	0	1	NA	8	0	0	0	0	0	0	0	0	1	0	0	0	0	0	0	0	0	0	0	0	0	0	0	1	0	0	0	0
104	3	1	0	0	0	0	0	0	1	0	0	2	3	1	2	1	3	0	0	2	18	0	1	1	2	0	0	0	0	0	0	1	0	0	0	0	0	0	0	0	0	0	0	0	1	0	0	0	0
105	3	4	1	2	0	0	2	0	1	0	0	2	3	0	2	1	1	0	5	1	17	1	0	0	3	0	0	0	0	0	0	0	0	0	0	0	0	0	0	0	0	0	1	0	1	0	0	0	0
106	2	3	1	1	0	0	1	0	1	0	1	1	3	2	4	1	3	1	2	7	21	0	0	0	1	0	0	1	0	0	0	1	0	0	0	0	0	0	0	0	0	0	0	0	2	0	0	0	0
107	3	2	0	0	0	0	0	0	0	0	1	1	4	0	4	1	3	1	2	NA	NA	0	0	0	0	0	0	0	0	0	0	0	0	0	0	0	0	0	0	0	0	0	1	0	1	0	0	0	0
108	3	1	0	0	0	0	0	0	0	0	1	1	3	2	4	1	3	1	2	7	21	0	0	0	0	0	0	0	0	0	0	1	0	0	0	0	0	0	0	0	0	0	1	0	2	0	0	0	0
109	3	0	0	0	0	0	0	0	0	0	0	1	4	0	4	1	3	1	2	7	21	0	0	0	0	0	0	0	0	0	0	0	0	0	0	0	0	0	0	0	0	0	1	0	1	0	0	0	0
110	1	0	0	0	0	0	0	0	0	0	0	1	4	0	2	1	1	0	0	8	20	0	0	0	0	0	0	0	0	0	0	1	0	0	0	0	0	0	0	0	0	0	0	0	1	0	0	0	0
111	2	1	0	0	0	0	0	0	0	0	0	1	4	2	2	1	1	0	5	1	17	0	0	0	0	0	0	1	1	0	0	1	0	0	0	0	0	0	0	0	0	0	1	0	4	0	0	0	0
112	1	1	0	0	0	0	0	0	0	0	0	2	3	0	2	1	1	0	0	8	9	0	0	0	0	0	0	0	0	0	0	0	0	0	0	0	0	0	0	0	0	0	1	0	1	0	0	NA	0
113	3	2	0	4	0	2	0	0	1	0	1	2	4	1	4	1	3	1	2	7	21	1	3	3	1	0	3	1	1	0	0	0	0	0	0	0	0	0	0	0	0	0	0	0	2	0	0	0	0
114	3	3	1	4	0	0	1	1	1	0	1	1	4	4	4	1	3	1	2	7	21	1	3	3	1	0	3	0	0	0	0	1	0	0	0	0	0	0	0	0	0	0	0	0	1	0	0	0	0
115	1	1	0	0	0	0	0	0	0	0	0	2	4	1	4	1	1	0	1	NA	16	0	0	0	0	0	0	0	0	0	0	1	0	0	0	0	0	0	0	0	0	0	0	0	1	0	0	0	0
116	1	2	0	4	0	0	0	0	1	0	0	2	3	0	3	1	3	1	2	7	21	1	3	0	0	0	3	1	1	0	0	0	0	0	0	0	0	0	0	0	0	0	0	0	2	0	0	0	0
117	2	2	0	0	0	0	0	0	0	0	1	2	4	5	4	1	3	1	2	7	21	0	0	0	0	0	0	0	0	0	0	0	1	0	0	1	0	0	0	0	0	0	0	0	2	0	0	0	0
118	3	0	0	0	0	0	0	0	0	0	0	1	4	0	2	1	3	1	2	7	21	0	0	0	0	0	0	0	1	0	0	0	0	0	0	1	0	0	0	0	0	0	0	0	2	0	0	0	0
119	4	2	0	0	0	0	0	0	0	0	1	2	3	5	4	1	3	1	2	7	21	0	0	0	0	0	0	0	0	0	0	0	1	0	0	0	0	0	0	0	0	0	0	0	1	0	0	0	0
120	2	0	0	0	0	0	0	0	0	0	0	1	4	0	4	1	3	1	2	7	9	0	0	0	0	0	0	1	0	0	0	0	0	0	0	0	0	0	0	0	0	0	0	0	1	0	0	0	0
121	1	0	0	0	0	0	0	0	0	0	1	2	4	2	4	1	3	1	2	7	21	0	0	0	0	0	0	0	0	0	0	1	0	0	0	0	0	0	0	0	0	0	0	0	1	0	0	0	0
123	4	4	1	1	0	2	3	0	1	0	0	2	4	3	2	1	1	0	5	1	4	1	1	3	1	0	0	1	0	0	0	0	1	1	0	1	0	0	0	0	0	0	0	0	4	0	0	0	0
124	3	2	0	0	0	0	0	0	0	0	0	1	4	0	4	1	3	1	2	7	9	0	0	0	0	0	0	1	0	0	0	0	0	0	0	0	0	0	0	0	0	0	0	0	1	0	0	0	0
125	2	2	0	0	0	0	0	0	0	0	1	1	3	2	4	1	3	1	2	7	21	0	0	0	0	0	0	1	1	0	0	0	0	0	0	0	0	0	0	0	0	0	0	0	2	0	0	0	0
126	4	2	0	2	0	0	1	1	1	1	0	2	4	0	4	1	3	1	2	7	21	0	1	0	0	0	1	0	0	0	0	0	0	0	0	1	0	0	0	0	0	0	0	0	1	0	0	0	0
127	5	2	0	4	0	0	1	0	2	0	1	2	4	3	4	1	3	1	2	7	NA	1	3	0	1	0	3	1	1	0	0	0	0	0	0	1	0	0	0	0	0	0	0	0	3	0	0	0	0
128	3	2	0	4	0	2	0	1	1	0	0	1	4	0	4	1	3	1	2	7	NA	1	3	3	2	0	3	1	1	0	0	0	0	0	0	0	0	0	0	0	0	0	0	0	2	0	0	0	0
129	1	0	0	0	0	0	0	0	0	0	0	2	4	0	4	1	1	0	1	1	17	0	0	0	0	0	0	0	0	0	0	0	0	0	0	0	0	0	0	0	0	0	1	0	1	0	0	0	0
130	1	0	0	0	0	0	0	0	0	0	0	2	4	0	2	1	1	0	5	1	19	0	0	0	0	0	0	0	0	1	0	1	0	0	0	0	0	0	0	0	0	0	0	0	2	0	0	NA	0
131	1	1	0	0	0	0	0	0	0	0	0	1	3	0	2	1	1	0	0	8	17	0	0	0	0	0	0	0	0	0	0	0	0	0	0	0	0	1	0	0	0	0	1	0	2	0	0	NA	0
132	3	3	1	0	0	0	0	0	0	0	0	2	3	0	2	1	1	0	0	8	20	0	0	0	0	0	0	0	0	1	0	0	0	0	0	1	0	0	0	0	0	0	0	0	2	0	0	NA	0
133	5	2	0	0	0	0	0	0	0	0	1	1	4	2	2	1	1	0	5	3	21	0	0	0	0	0	0	0	0	0	0	0	0	0	0	0	0	0	0	0	0	0	1	0	1	0	0	0	0
134	3	0	0	0	0	0	0	0	0	0	0	1	4	0	2	1	2	0	1	1	17	0	0	0	0	0	0	0	0	0	0	0	0	0	0	0	0	0	0	0	0	0	1	0	1	0	0	0	0
135	1	0	0	0	0	0	0	0	0	0	0	2	4	0	2	1	2	0	1	1	17	0	0	0	0	0	0	0	0	0	0	0	0	0	0	0	0	0	0	0	0	0	1	0	1	0	0	0	0
136	3	0	0	0	0	0	0	0	0	0	0	1	4	1	2	1	1	0	5	2	21	0	0	0	0	0	0	0	1	0	0	0	0	0	0	0	0	0	0	0	0	0	1	0	2	0	0	0	0
137	5	2	0	1	0	2	3	0	1	0	0	2	4	0	4	1	1	0	1	2	21	1	0	3	1	0	0	0	0	0	0	0	0	0	0	1	0	0	0	0	0	0	0	0	1	0	0	0	0
138	1	0	0	0	0	0	0	0	0	0	0	1	4	0	4	1	1	0	5	1	17	0	0	0	0	0	0	0	0	0	0	0	0	0	0	0	0	0	0	0	0	0	1	0	1	0	0	0	0
140	3	5	1	4	0	2	2	0	1	0	0	2	4	2	4	1	1	0	5	3	NA	1	2	3	1	0	3	0	1	0	0	0	0	0	1	0	0	0	0	0	0	0	1	0	3	0	0	0	0
141	1	0	0	0	0	0	0	0	0	0	0	1	4	0	4	1	1	0	5	1	17	0	0	0	0	0	0	0	0	0	0	1	0	0	0	0	0	0	0	0	0	0	0	0	1	0	0	0	0
142	1	0	0	0	0	0	0	0	0	0	0	1	4	0	2	1	1	0	1	1	21	0	0	0	0	0	0	1	0	0	0	0	0	0	0	0	0	0	0	0	0	0	0	0	1	0	0	0	0
143	1	1	0	0	0	0	0	0	0	0	0	2	4	0	2	1	1	0	1	1	21	0	0	0	0	0	0	0	0	0	0	0	0	0	0	0	0	0	0	0	0	0	0	1	1	0	0	0	0
144	1	0	0	0	0	0	0	0	0	0	0	2	3	1	2	1	1	0	0	8	17	0	0	0	0	0	0	0	0	0	0	1	0	0	0	1	0	0	0	0	0	0	0	0	2	0	0	0	0
145	1	0	0	0	0	0	0	0	0	0	0	2	4	0	2	1	1	0	0	8	8	0	0	0	0	0	0	0	0	0	0	0	0	0	0	0	0	0	0	0	0	0	0	1	1	0	0	0	0
146	0	3	1	0	0	0	0	0	0	0	0	2	4	0	4	NA	NA	0	5	1	8	0	0	0	0	0	0	0	0	0	0	0	0	0	0	0	0	0	0	0	0	0	0	1	1	NA	0	NA	0
147	1	0	0	0	0	0	0	0	0	0	0	2	4	0	2	1	1	0	0	8	8	0	0	0	0	0	0	0	0	0	0	0	0	0	0	0	0	0	0	0	0	0	0	1	1	0	0	0	0
148	3	4	1	2	0	2	2	0	1	0	0	2	4	0	2	1	1	0	0	8	17	1	0	0	0	0	2	1	1	0	0	1	1	0	0	0	0	0	0	0	0	0	0	0	4	0	0	0	0
149	1	2	0	1	0	0	2	0	1	0	0	2	4	1	4	1	1	0	5	1	8	0	1	0	0	0	0	0	0	0	0	0	0	0	0	1	1	0	0	0	0	0	0	0	2	0	0	0	0
150	1	0	0	0	0	0	0	0	0	0	0	2	4	0	2	1	1	0	5	1	17	0	0	0	0	0	0	1	0	0	0	1	0	0	0	1	0	0	0	0	0	0	0	0	3	0	0	NA	0
151	1	0	0	0	0	0	0	0	0	0	0	2	4	0	4	1	1	0	1	2	21	0	0	0	0	0	0	1	1	0	0	0	0	0	0	0	0	0	0	0	0	0	0	0	2	0	0	0	0
152	1	1	0	0	0	0	0	0	0	0	0	1	4	0	4	1	1	0	1	1	13	0	0	0	0	0	0	0	0	0	0	0	0	0	0	0	0	0	0	0	0	0	1	0	1	0	0	0	0
153	3	0	0	0	0	0	0	0	0	0	0	1	4	0	2	1	1	0	5	1	17	0	0	0	0	0	0	0	0	0	0	0	0	0	0	1	0	0	0	0	0	0	0	0	1	0	0	0	0
154	1	1	0	0	0	0	0	0	0	0	0	1	3	0	4	1	1	0	5	1	18	0	0	0	0	0	0	0	0	0	0	1	0	0	0	0	0	0	0	0	0	0	0	0	1	0	0	0	0
155	1	0	0	0	0	0	0	0	0	0	0	2	3	0	2	1	1	0	1	8	17	0	0	0	0	0	0	0	0	0	0	0	0	0	0	0	0	0	0	0	0	0	1	0	1	0	0	0	0
156	1	0	0	0	0	0	0	0	0	0	0	1	3	0	3	1	1	0	1	2	18	0	0	0	0	0	0	0	0	0	0	0	0	0	0	0	0	0	0	0	0	0	1	0	1	0	0	0	0
157	1	1	0	0	0	0	0	0	0	0	0	2	4	0	2	1	1	0	5	1	8	0	0	0	0	0	0	0	0	0	0	1	0	0	0	0	0	0	0	0	0	0	0	0	1	0	0	0	0
158	1	3	1	1	0	4	3	NA	1	0	0	2	4	7	4	1	1	0	5	2	8	1	0	0	0	0	0	0	0	0	0	0	0	0	0	1	1	0	0	0	0	0	0	0	2	0	0	0	0
159	3	2	0	1	0	0	2	0	1	0	0	2	0	0	2	1	1	0	5	1	17	1	0	0	0	0	2	0	0	0	0	0	0	0	0	0	0	0	0	0	0	0	1	0	1	NA	0	NA	0
160	1	0	0	0	0	0	0	0	0	0	0	2	3	1	4	1	1	0	1	1	8	0	0	0	0	0	0	0	0	0	0	1	0	0	0	1	0	0	0	0	0	0	0	0	2	0	0	0	0
161	1	1	0	0	0	0	0	0	0	0	0	2	3	0	2	1	1	0	0	8	8	0	0	0	0	0	0	0	0	0	0	0	0	0	0	0	0	0	0	0	0	0	1	0	1	0	0	0	0
163	1	1	0	0	0	0	0	0	0	0	0	1	4	1	2	1	1	0	5	1	17	0	0	0	0	0	0	1	1	0	1	1	0	0	0	0	0	0	0	0	0	0	0	0	4	0	0	0	0
164	1	0	0	0	0	0	0	0	0	0	0	2	3	0	2	1	1	0	5	8	17	0	0	0	0	0	0	0	0	0	0	0	1	0	0	0	0	0	0	0	0	0	0	0	1	0	0	0	0
165	1	0	0	0	0	0	0	0	0	0	0	1	4	0	2	1	1	0	5	8	17	0	0	0	0	0	0	0	0	0	0	0	1	0	0	0	0	0	0	0	0	0	0	0	1	NA	0	0	0
166	2	1	0	0	0	0	0	0	0	0	0	1	4	0	4	1	1	0	1	1	17	0	0	0	0	0	0	0	0	0	0	1	0	0	0	0	0	0	0	0	0	0	0	0	1	NA	0	0	0
167	5	0	0	0	0	0	0	0	0	0	0	2	4	0	4	1	1	0	5	1	17	0	0	0	0	0	0	1	0	0	0	0	0	0	0	0	0	0	0	0	0	0	1	0	2	0	0	0	0
168	0	1	0	0	0	0	0	0	0	0	0	1	0	0	2	1	1	0	0	2	17	0	0	0	0	0	0	1	1	0	1	1	0	0	0	1	0	0	0	0	0	0	0	0	5	0	0	NA	0
169	0	1	0	0	0	0	0	0	0	0	0	1	3	0	2	1	1	0	1	2	1	0	0	0	0	0	0	0	0	0	0	0	0	0	0	0	0	0	0	0	0	0	1	0	1	NA	0	0	0
172	0	0	0	0	0	0	0	0	0	0	0	2	0	0	4	1	1	0	5	1	21	0	0	0	0	0	0	0	1	0	0	0	0	0	0	0	0	0	0	0	1	0	0	0	2	1	0	0	0
173	1	2	0	0	0	0	0	0	0	0	0	2	0	0	4	1	1	0	1	2	NA	0	0	0	0	0	0	0	1	0	0	0	1	0	0	0	0	0	0	0	0	0	0	0	2	NA	0	NA	0
174	2	2	0	0	0	3	2	1	0	1	0	2	4	2	4	1	1	0	5	1	21	0	2	3	2	0	0	0	0	0	0	0	0	0	0	1	0	0	0	0	0	0	0	0	1	0	0	0	0
175	1	1	0	0	0	0	0	0	0	0	0	1	3	1	2	1	3	0	1	1	1	0	0	0	0	0	0	0	0	0	0	0	0	0	0	0	0	0	0	0	0	0	1	0	1	0	0	0	0
176	3	0	0	0	0	0	0	0	0	0	0	2	3	0	4	1	1	0	1	2	18	0	0	0	0	0	0	0	1	0	0	0	0	0	0	0	0	0	0	0	0	0	1	0	2	0	0	0	0
177	2	1	0	0	0	0	1	0	1	0	0	1	3	3	4	1	3	0	1	1	2	0	0	0	1	0	0	0	0	0	0	0	0	0	0	1	0	0	0	0	0	0	0	0	1	1	0	0	0
178	4	0	0	0	0	0	0	0	0	0	0	1	4	1	4	1	3	1	2	7	21	0	0	0	0	0	0	0	0	0	0	0	0	0	0	0	0	0	0	0	0	1	0	0	1	0	0	0	0
179	4	2	0	4	0	0	2	1	1	0	0	1	4	1	4	1	3	1	2	7	21	1	0	3	0	0	1	0	0	0	0	0	0	0	0	0	0	0	0	0	0	0	1	0	1	0	0	0	0
180	2	2	0	0	0	0	0	0	0	0	0	2	4	1	4	1	3	1	2	7	21	0	0	0	0	0	0	0	0	0	0	0	0	0	0	0	0	0	0	0	0	0	1	0	1	0	0	0	0
181	2	2	0	0	0	0	0	0	0	0	0	2	3	4	2	1	3	1	2	7	21	0	0	0	0	0	0	0	0	0	0	1	0	0	0	1	0	1	0	0	0	0	0	0	3	0	0	0	0
182	3	2	0	0	0	0	0	0	0	0	0	1	3	2	4	1	3	1	2	7	21	0	0	0	0	0	0	1	0	0	0	0	1	0	0	0	0	0	0	0	0	0	0	0	2	0	0	0	0
183	7	4	1	2	0	3	3	0	1	0	0	2	4	8	2	1	1	0	2	1	17	1	2	3	3	0	0	1	1	0	0	1	0	1	0	1	0	0	1	0	0	0	0	0	6	0	0	1	0
184	3	4	1	4	0	5	2	1	2	0	0	1	3	2	4	1	3	1	2	7	21	1	1	3	1	0	3	1	1	0	0	0	0	0	0	0	0	0	0	0	0	0	0	0	2	NA	0	0	0
185	3	0	0	0	0	0	0	0	0	0	0	1	4	0	2	1	1	0	0	8	17	0	0	0	0	0	0	0	0	0	0	0	0	0	0	0	0	0	0	0	0	0	1	0	1	0	0	NA	0
186	1	1	0	0	0	0	0	0	0	0	0	2	4	0	2	1	1	0	0	1	17	0	0	0	0	0	0	0	0	0	0	0	0	0	0	0	0	0	0	0	0	0	1	0	1	0	0	0	0
187	2	0	0	0	0	0	0	0	0	0	0	1	3	0	1	1	3	1	2	7	21	0	0	0	0	0	0	0	0	0	0	0	0	0	0	0	0	0	0	0	0	0	1	0	1	0	0	0	0
188	1	1	0	0	0	0	0	0	0	0	0	1	3	0	2	1	3	0	0	1	21	0	0	0	0	0	0	0	0	0	0	1	0	0	0	0	0	0	0	0	0	0	0	0	1	0	0	0	0
189	1	1	0	0	0	0	0	0	0	0	0	2	3	0	2	1	3	0	0	1	21	0	0	0	0	0	0	0	0	0	0	1	0	0	0	0	0	0	0	0	0	0	0	0	1	NA	0	0	0
190	2	3	1	3	0	5	2	1	2	0	0	2	4	0	4	1	3	1	2	7	21	1	0	1	0	0	3	0	1	0	0	0	0	0	0	0	0	0	0	0	0	0	0	0	1	0	0	0	0
191	6	2	0	0	0	0	0	0	0	0	0	2	4	0	4	1	3	1	2	7	NA	0	0	0	0	0	0	0	0	0	0	0	0	0	0	0	0	0	0	0	0	1	0	0	1	0	0	0	0
192	3	2	0	0	0	0	0	0	0	0	0	1	4	0	4	1	3	1	2	7	NA	0	0	0	0	0	0	0	0	0	0	0	0	0	0	0	0	0	0	0	0	0	1	0	1	0	0	NA	0
193	2	2	0	0	0	0	0	0	0	0	0	1	3	0	4	1	3	1	2	7	NA	0	0	0	0	0	0	1	1	0	0	0	0	0	0	0	0	0	0	0	0	0	0	0	2	0	0	0	0
194	5	1	0	0	0	0	0	0	0	0	0	1	3	1	4	NA	3	1	2	7	NA	0	0	0	0	0	0	0	0	0	0	0	0	0	0	0	0	0	0	0	0	0	1	0	1	0	0	0	0
195	4	0	0	0	0	0	0	0	0	0	0	1	4	0	4	1	3	1	2	7	NA	0	0	0	0	0	0	0	0	0	0	0	0	0	0	0	0	0	0	0	0	0	1	0	1	0	0	0	0
196	2	0	0	0	0	0	0	0	0	0	0	2	4	0	4	1	3	1	2	7	NA	0	0	0	0	0	0	0	0	0	0	0	0	0	0	0	0	0	0	0	0	1	0	0	1	NA	0	NA	0
197	2	2	0	0	0	0	0	0	0	0	0	2	3	1	4	1	3	1	2	7	NA	0	0	0	0	0	0	1	0	0	0	0	0	0	0	0	0	0	0	0	0	0	1	0	2	0	0	0	0
198	2	0	0	0	0	0	0	0	0	0	0	1	3	1	4	1	3	1	2	7	NA	0	0	0	0	0	0	0	0	0	0	1	0	0	0	0	0	0	0	0	0	0	0	0	1	0	0	NA	0
199	1	2	0	0	0	0	1	0	1	0	0	1	3	4	2	1	6	0	0	3	21	1	2	0	0	0	3	0	0	0	0	0	0	0	0	0	0	0	0	0	0	0	1	0	1	0	0	0	0
200	3	1	0	0	0	0	0	0	0	0	0	2	4	4	4	1	6	0	5	1	NA	0	0	0	0	0	0	1	1	0	0	0	0	0	0	0	0	0	0	0	0	0	0	0	2	0	0	0	0
201	1	0	0	0	0	0	0	0	0	0	0	1	3	0	2	1	1	0	0	2	10	0	0	0	0	0	0	0	0	0	0	0	0	0	0	0	0	0	0	0	0	0	1	0	1	0	0	0	0
202	3	3	1	1	1	10	3	NA	2	0	0	2	0	0	4	1	1	0	5	1	17	1	1	1	3	0	3	0	0	0	0	0	0	0	0	0	0	0	0	0	0	1	0	0	1	0	0	NA	0
203	1	0	0	0	0	0	0	0	0	0	0	1	4	5	2	1	1	0	1	1	10	0	0	0	0	0	0	1	1	1	0	0	0	0	0	1	0	1	1	0	0	0	0	0	6	0	0	0	0
204	5	3	1	2	1	5	3	0	2	0	0	2	4	4	4	1	2	0	1	2	7	1	3	3	1	0	3	0	0	0	0	0	0	0	0	0	0	0	0	0	0	0	1	0	1	0	0	0	0
205	5	2	0	1	0	3	1	0	1	0	0	2	4	1	4	1	1	0	1	2	4	1	1	3	1	0	0	0	0	0	0	0	0	0	0	0	0	0	0	0	0	0	1	0	1	0	0	0	0
206	1	2	0	0	0	0	0	0	0	0	1	2	4	5	2	1	2	0	1	2	19	0	0	0	0	0	0	0	0	1	0	0	0	0	1	0	0	0	0	0	0	0	0	0	2	0	0	0	0
207	3	1	0	1	0	0	1	0	1	0	0	1	4	6	2	1	1	0	5	1	13	1	1	3	1	0	0	1	1	0	0	0	0	0	0	1	0	0	1	0	1	0	0	0	5	0	0	0	0
208	4	2	0	0	0	2	1	0	1	0	0	2	3	3	4	1	2	0	1	2	21	1	1	3	2	0	0	0	0	0	0	0	0	0	0	0	0	0	0	0	0	1	0	0	1	0	0	0	0
209	4	2	0	0	0	2	0	1	1	1	1	2	4	5	2	1	1	0	1	2	4	0	1	3	0	0	1	0	1	0	0	0	0	0	0	0	0	0	0	0	0	0	0	0	1	0	0	0	0
210	1	4	1	4	0	3	3	0	2	0	1	2	3	3	2	1	1	0	1	2	9	1	2	3	1	0	0	0	0	0	0	1	1	0	0	0	0	0	0	1	0	0	0	0	3	0	0	0	0
211	1	1	0	0	0	0	0	0	0	0	1	1	4	5	2	1	1	0	1	2	20	0	0	0	0	0	0	1	0	1	0	0	0	0	0	0	0	0	0	0	0	0	0	0	2	1	0	0	0
212	1	0	0	0	0	0	0	0	0	0	0	2	3	3	2	1	1	0	1	2	9	0	0	0	0	0	0	0	0	0	0	0	0	0	0	0	0	0	0	0	0	0	1	0	1	0	0	0	0
215	6	3	1	1	0	0	0	1	1	1	1	1	4	6	2	1	1	0	1	2	21	0	1	1	2	0	3	1	0	0	0	0	1	0	0	0	0	0	0	0	0	0	0	0	2	1	0	NA	1
216	7	5	1	4	0	9	3	1	2	1	1	2	4	7	2	1	1	0	5	2	21	1	2	3	2	0	3	1	1	1	0	0	0	0	0	0	0	0	0	0	0	0	0	0	3	1	0	0	0
218	1	0	0	0	0	0	0	0	0	0	0	1	3	3	2	1	1	0	1	2	14	0	0	0	0	0	0	0	0	0	0	0	0	0	0	0	0	0	0	0	0	0	1	0	1	0	0	0	0
219	4	0	0	0	0	0	0	0	0	0	0	1	4	4	2	1	1	0	0	1	14	0		0	0	0	0	1	1	0	0	0	0	0	0	0	0	0	0	0	0	0	0	0	2	1	0	0	0
220	0	0	0	0	0	0	0	0	0	0	0	1	4	4	2	1	1	0	0	1	21	0	0	0	0	0	0	1	0	0	0	1	0	0	0	0	0	0	0	0	0	0	0	0	2	1	0	0	0
221	2	1	0	0	0	0	0	0	0	0	0	2	3	4	2	1	1	0	0	1	17	0	0	0	0	0	0	0	0	0	0	0	0	0	0	0	0	0	0	0	0	0	1	0	1	0	0	0	0
222	0	0	0	0	0	0	0	0	0	0	0	1	4	4	2	1	1	0	0	1	2	0	0	0	0	0	0	0	0	0	0	0	0	0	0	0	0	0	0	0	0	0	1	0	1	NA	0	NA	0
223	0	1	0	0	0	0	0	0	0	0	0	2	4	4	2	1	1	0	0	1	17	0	0	0	0	0	0	0	0	0	0	0	0	0	0	0	0	0	0	0	0	0	1	0	1	NA	0	NA	0
224	1	4	1	1	0	5	3	NA	1	0	0	2	0	0	2	1	1	0	5	1	21	1	0	0	1	0	0	0	0	0	0	0	0	0	0	0	0	0	0	0	0	0	1	0	1	NA	0	NA	0
225	3	2	0	1	2	1	1	0	1	0	0	2	4	4	2	1	1	0	5	2	17	0	0	1	0	0	1	0	0	0	0	0	0	0	0	0	0	0	0	0	0	0	1	0	1	0	0	0	0
226	3	3	1	1	0	0	2	0	1	0	0	1	4	1	4	1	2	0	5	1	21	1	3	3	1	0	1	0	0	0	0	0	0	0	0	1	1	0	0	0	0	0	0	0	2	0	0	0	0
228	4	1	0	0	0	0	3	0	1	0	0	1	4	7	2	1	1	0	3	2	14	1	1	0	0	0	0	1	1	0	0	1	0	0	0	0	0	1	1	1	0	0	1	0	7	0	0	0	0
229	4	3	1	0	0	0	0	0	0	0	0	2	4	6	2	1	1	0	1	2	17	NA	0	0	0	0	0	1	1	0	0	1	0	0	0	1	0	1	1	1	0	0	1	0	8	0	0	0	0
230	6	2	0	1	0	0	1	0	1	0	1	1	4	5	4	1	1	0	5	1	20	0	0	0	0	0	2	1	1	0	0	0	0	0	0	0	0	0	0	0	0	0	1	0	3	0	0	0	0
231	5	2	0	1	0	0	1	0	1	0	0	2	4	4	2	1	1	0	5	2	17	0	0	1	0	0	2	0	0	0	0	1	0	0	0	0	0	0	0	0	0	0	0	0	1	0	0	0	0
232	3	3	1	1	0	0	2	0	1	0	0	1	4	3	2	1	1	0	5	1	2	0	0	0	1	0	0	0	0	0	0	0	0	0	0	0	0	0	0	0	0	0	1	0	1	0	0	1	0
233	3	3	1	1	0	0	2	1	1	0	0	1	4	1	2	1	1	0	1	2	20	0	1	1	0	0	0	1	1	0	0	1	1	1	0	1	1	1	0	0	0	1	0	0	9	0	0	0	0
234	2	0	0	0	0	0	0	0	0	0	0	2	3	0	2	1	1	0	5	1	17	0	0	0	0	0	0	0	0	0	0	0	1	0	0	0	0	0	0	0	0	0	0	0	1	0	0	0	0
236	1	2	0	0	0	0	0	0	0	0	1	1	3	1	2	1	1	0	5	1	18	0	0	0	0	0	0	0	0	1	0	0	0	0	0	0	0	0	0	0	0	0	0	0	1	1	0	0	0
237	2	3	1	1	0	0	0	0	0	0	1	2	4	0	4	1	2	0	1	3	21	0	0	1	0	0	0	0	0	0	0	0	0	0	0	0	0	0	0	0	0	0	1	0	1	0	0	0	0
238	6	0	0	0	0	0	0	0	0	0	0	1	3	4	2	1	1	0	5	2	21	0	0	0	0	0	0	0	1	0	0	0	0	0	0	0	0	1	0	0	0	0	0	0	2	0	0	0	0
239	4	0	0	0	0	0	0	0	0	0	0	1	4	0	4	1	1	0	1	3	17	0	0	0	0	0	0	1	0	0	0	0	0	0	0	0	0	0	0	0	0	0	0	0	1	0	0	0	0
240	2	1	0	1	0	0	2	0	1	0	0	1	4	0	4	1	1	0	1	3	21	0	0	0	0	0	0	0	0	0	0	0	0	0	0	0	0	0	0	0	0	0	1	0	1	0	0	0	0
241	2	0	0	0	0	0	0	0	0	0	0	2	4	0	4	1	1	0	1	2	17	0	0	0	0	0	0	0	0	0	0	0	0	0	0	0	0	0	0	0	0	0	1	0	1	0	0	0	0
242	2	3	1	0	0	0	0	0	0	0	0	2	4	1	4	1	1	0	1	2	21	0	0	0	0	0	0	1	1	0	0	0	1	0	0	0	0	0	0	0	0	0	0	0	3	0	0	0	0
243	3	0	0	0	0	0	0	0	0	0	0	2	3	1	2	1	2	1	2	7	19	0	0	0	0	0	0	1	1	0	0	0	1	0	0	0	0	0	0	0	0	0	0	0	3	0	0	0	0
244	4	0	0	0	0	0	0	0	0	0	0	1	3	0	1	1	2	1	2	8	21	0	0	0	0	0	0	0	0	0	0	0	0	0	0	0	0	0	0	0	0	0	1	0	1	0	0	0	0
245	6	0	0	0	0	0	0	0	0	0	0	1	3	2	3	1	2	1	2	7	21	0	0	0	0	0	0	1	0	0	0	0	1	0	0	0	0	0	0	0	0	0	0	0	2	0	0	0	0
246	6	0	0	0	0	0	0	0	0	0	0	1	4	1	4	1	2	1	2	7	21	0	0	0	0	0	0	1	1	0	0	1	0	0	0	1	1	0	0	0	0	0	0	0	5	0	0	0	0
247	6	1	0	0	0	0	0	0	0	0	0	2	4	2	4	1	2	1	2	7	13	0	0	0	0	0	0	0	0	0	0	0	0	0	0	0	0	0	0	0	0	0	1	0	1	0	0	0	0
248	2	1	0	0	0	0	0	0	0	0	0	1	4	1	4	1	2	1	2	1	21	0	0	0	0	0	0	1	1	1	1	0	0	0	0	0	0	0	0	0	0	0	0	0	4	0	0	0	0
249	5	1	0	0	0	0	0	0	0	0	0	1	3	3	4	1	2	1	2	7	21	0	0	0	0	0	0	0	1	0	0	0	0	0	0	0	0	0	0	0	0	0	0	0	1	0	0	0	0
250	4	0	0	1	0	2	2	1	1	0	0	1	3	0	1	1	2	1	2	8	13	0	2	1	2	0	1	0	0	0	0	0	0	0	0	0	0	0	0	0	0	0	1	0	1	0	0	0	0
251	4	3	1	4	0	2	2	0	2	0	0	1	3	4	2	1	2	1	2	7	17	1	3	1	1	0	3	1	1	0	0	0	0	0	0	0	0	1	0	0	0	0	0	0	3	0	0	0	0
252	5	1	0	0	0	0	0	0	0	0	0	2	4	0	4	1	2	1	2	8	17	0	0	0	0	0	0	1	0	0	0	0	1	0	0	0	0	0	0	0	0	0	0	0	2	0	0	0	0
253	4	0	0	0	0	0	0	0	0	0	0	1	3	3	4	NA	2	1	2	NA	21	0	0	0	0	0	0	0	1	0	0	1	0	0	0	0	0	0	0	0	0	0	0	0	2	0	0	0	0
254	2	0	0	0	0	0	0	0	0	0	0	1	4	1	4	1	2	1	2	7	14	0	0	0	0	0	0	0	0	0	0	0	0	0	0	0	0	0	0	0	0	0	1	0	1	0	0	0	0
255	3	1	0	0	0	0	0	0	0	0	0	2	4	0	4	1	2	1	2	8	18	0	0	0	0	0	0	0	0	0	0	0	0	0	0	0	0	0	0	0	0	1	0	0	1	0	0	0	0
256	4	0	0	0	0	0	0	0	0	0	0	2	4	1	4	1	2	1	2	7	21	0	0	0	0	0	0	1	0	0	0	0	0	0	0	1	0	0	0	0	0	0	0	0	2	1	0	0	0
257	7	2	0	4	0	2	1	0	1	0	0	2	4	0	1	1	2	1	2	7	8	1	3	0	2	0	1	0	0	0	0	0	0	0	0	0	0	0	0	0	0	0	1	0	1	0	0	0	0
258	4	0	0	0	0	0	0	0	0	0	0	1	4	0	4	1	2	1	2	7	17	0	0	0	0	0	0	0	0	0	0	0	0	0	0	0	0	0	0	0	0	0	1	0	1	0	0	0	0
259	2	2	0	4	0	5	2	0	1	0	0	2	3	3	4	1	2	1	2	1	18	1	3	0	0	0	3	1	1	0	1	0	0	0	0	1	1	0	0	0	0	0	0	0	5	0	0	0	0
260	4	0	0	3	0	0	2	0	2	0	0	2	3	1	4	1	2	1	2	7	9	1	3	1	1	0	3	1	0	0	0	0	1	0	0	1	0	0	0	0	0	0	0	0	3	0	0	0	0
261	5	0	0	0	0	0	0	0	0	0	0	1	3	1	2	1	1	0	5	2	21	0	0	0	0	0	0	0	1	0	0	0	0	0	0	0	0	1	0	0	0	0	0	0	2	0	0	0	0
262	3	0	0	0	0	0	0	0	0	0	0	2	4	2	2	1	2	1	2	7	18	0	0	0	0	0	0	1	1	0	0	0	1	0	0	1	1	1	1	0	0	1	0	0	8	0	0	0	0
263	6	2	0	3	0	2	3	0	1	0	0	2	4	2	4	1	2	1	2	7	8	1	2	0	1	0	2	0	0	0	0	0	0	0	0	0	0	0	0	0	0	0	1	0	1	0	0	0	0
264	1	0	0	1	0	0	1	0	1	0	0	1	4	0	4	1	1	0	1	3	21	0	0	0	0	0	0	0	0	0	0	0	0	0	0	0	0	0	0	0	0	0	1	0	1	0	0	0	0
265	3	2	0	0	0	0	0	0	0	0	0	2	4	2	4	1	1	0	1	2	21	0	0	0	0	0	0	0	1	0	0	0	1	0	0	1	0	0	0	0	0	0	0	0	3	0	0	0	0
266	3	1	0	4	0	0	0	0	0	0	0	1	4	1	4	1	1	0	1	2	18	0	0	0	0	0	0	0	1	0	0	0	0	0	0	0	0	0	0	0	0	0	0	0	1	0	0	0	0
267	4	1	0	0	0	0	0	0	0	0	0	1	4	1	4	1	1	0	1	2	18	0	0	0	0	0	0	0	1	0	0	0	0	0	0	0	0	0	0	0	0	0	0	0	1	0	0	0	0
268	0	2	0	0	0	0	0	0	1	0	0	2	0	0	4	1	1	0	5	1	7	0	0	0	1	0	0	1	0	0	1	0	1	0	0	0	0	0	0	0	0	0	0	0	3	1	0	0	0
269	2	2	0	4	0	5	1	0	1	0	1	1	3	2	1	1	3	1	2	7	21	1	3	0	0	0	2	0	0	0	0	0	0	0	0	0	0	0	0	0	0	0	1	0	1	0	0	0	0
270	3	2	0	0	0	0	0	0	0	0	1	2	4	2	4	1	3	1	2	7	21	0	0	0	0	0	0	0	0	0	0	1	0	0	0	0	0	0	0	0	0	0	0	0	1	0	0	0	0
271	3	0	0	0	0	0	0	0	0	0	1	2	4	2	2	1	3	1	2	7	19	0	0	0	0	0	0	0	0	0	0	0	0	0	0	0	0	0	0	0	0	0	1	0	1	0	0	0	0
272	4	2	0	0	0	0	0	0	0	0	1	1	4	1	2	1	3	1	2	NA	9	0	0	0	0	0	0	0	0	0	0	0	0	0	0	1	0	0	0	0	0	0	0	0	1	0	0	0	0
273	5	0	0	0	0	0	0	0	0	0	1	2	3	2	2	1	3	1	2	7	21	0	0	0	0	0	0	0	0	0	0	0	0	0	0	0	0	0	0	0	0	0	1	0	1	0	0	0	0
274	4	0	0	0	0	0	0	0	0	0	1	1	3	1	4	1	3	1	2	7	21	0	0	0	0	0	0	0	0	0	0	0	0	0	0	1	0	0	0	0	0	0	0	0	1	0	0	0	0
275	4	3	1	3	0	4	3	1	2	1	1	2	4	7	4	1	2	0	1	1	17	1	3	3	1	0	3	0	0	0	0	0	0	0	0	0	0	0	0	0	0	0	1	0	1	0	0	1	0
276	3	4	1	0	0	0	0	0	0	0	0	2	4	10	4	1	1	0	5	1	7	0	0	0	0	0	0	1	0	1	1	1	1	0	0	0	1	0	0	0	0	0	1	0	7	1	0	1	0
277	2	0	0	0	0	0	0	0	0	0	0	2	4	1	4	1	2	0	1	2	17	0	0	0	0	0	0	1	1	0	0	1	1	0	0	0	0	0	0	0	0	0	0	0	4	0	0	0	0
278	2	1	0	0	0	0	0	0	0	0	0	2	3	7	2	1	1	0	5	2	17	0	0	0	0	0	0	1	1	1	0	0	0	0	0	1	0	0	0	0	1	0	1	0	6	0	0	0	0
279	5	2	0	0	0	0	1	0	1	0	0	1	4	4	2	1	1	0	5	1	14	0	0	1	0	0	0	1	0	0	0	1	0	0	0	0	0	0	0	0	0	0	1	0	3	0	0	0	0
280	3	2	0	1	0	2	3	0	1	0	0	2	4	7	2	1	1	0	5	1	2	0	1	0	0	0	0	1	1	1	1	1	0	0	0	0	0	0	0	0	0	0	0	0	5	0	0	1	0
281	2	0	0	0	0	0	0	0	0	0	0	1	3	3	1	1	1	0	0	3	17	0	0	0	0	0	0	0	0	0	0	0	0	0	0	0	0	0	0	0	0	0	1	0	1	0	0	0	0
282	1	1	0	0	0	0	0	0	0	0	0	2	3	3	2	1	1	0	0	3	17	0	0	0	0	0	0	1	0	0	0	0	0	0	0	0	0	0	0	0	0	0	1	0	2	0	0	0	0
283	1	0	0	0	0	0	0	0	1	0	0	1	3	3	2	1	6	0	5	8	21	0	0	0	0	0	0	0	0	0	0	0	0	0	0	0	0	0	0	0	0	0	0	0	0	0	0	0	0
284	2	0	0	0	0	0	0	0	0	0	0	2	3	0	4	1	2	0	1	1	21	0	0	0	0	0	0	0	0	0	0	0	0	1	0	0	0	0	0	0	0	0	0	0	1	0	0	0	0
285	2	1	0	0	0	0	0	0	0	0	0	1	3	6	4	1	2	1	2	7	17	0	0	0	0	0	0	1	1	0	0	0	1	0	0	1	1	0	0	0	0	0	0	0	5	0	0	0	0
286	2	0	0	0	0	0	0	0	0	0	0	2	3	1	1	1	2	1	2	7	21	0	0	0	0	0	0	0	0	0	0	0	0	0	0	0	0	0	0	0	0	0	1	0	1	0	0	0	0
287	4	0	0	0	0	0	0	0	0	0	0	1	4	2	1	1	2	1	2	7	21	0	0	0	0	0	0	0	0	0	0	0	0	0	0	0	0	0	0	0	0	0	1	0	1	0	0	0	0
288	3	1	0	0	0	0	0	0	0	0	0	1	4	4	2	1	2	1	2	7	20	0	0	0	0	0	0	1	1	0	0	0	0	0	0	1	0	1	1	0	0	0	0	0	5	1	0	0	0
289	1	0	0	0	0	0	0	0	0	0	0	2	3	1	2	1	2	1	2	7	19	0	0	0	0	0	0	0	0	0	0	0	1	0	0	0	0	0	0	0	0	0	0	0	1	0	0	0	0
290	1	0	0	0	0	0	0	0	0	0	0	2	4	1	4	1	2	1	2	7	17	0	0	0	0	0	0	0	0	1	0	0	0	0	0	0	0	0	0	0	0	0	0	0	1	0	0	0	0
291	1	1	0	0	0	0	0	0	0	0	0	2	4	0	4	1	2	1	2	7	NA	0	0	0	0	0	0	1	0	0	0	0	0	0	0	0	0	0	0	0	0	0	0	0	1	1	0	0	0
292	2	1	0	0	0	0	0	0	0	0	0	2	4	1	4	1	2	1	2	7	17	0	0	0	0	0	0	0	0	0	0	0	1	0	0	0	0	0	0	0	0	0	0	0	1	0	0	0	0
293	4	1	0	0	0	0	0	0	0	0	0	2	4	1	4	1	2	1	2	7	18	0	0	0	0	0	0	1	1	0	0	0	0	0	0	0	0	0	0	0	0	0	0	0	2	0	0	0	0
294	1	0	0	0	0	0	0	0	0	0	0	2	3	2	1	1	2	1	2	7	17	0	0	0	0	0	0	0	0	0	1	0	0	0	0	0	0	0	0	0	0	0	0	0	1	0	0	0	0
295	3	1	0	0	0	0	0	0	0	0	0	2	4	0	4	1	2	1	2	7	21	0	0	0	0	0	0	1	0	0	0	0	0	0	0	0	0	0	0	0	0	0	0	0	1	0	0	0	0
296	3	1	0	0	0	0	0	0	0	0	0	2	3	3	4	1	2	1	2	7	17	0	0	0	0	0	0	1	1	0	1	0	1	0	0	0	0	0	0	0	0	1	0	0	5	0	0	0	0
297	2	2	0	0	0	0	0	0	0	0	0	1	2	1	3	1	1	1	2	7	17	0	0	0	0	0	0	0	0	0	0	0	1	0	0	0	0	0	0	0	0	0	0	0	1	0	0	0	0
298	2	1	0	0	0	0	0	0	0	0	0	2	0	1	4	1	2	1	0	7	17	0	0	0	0	0	0	0	0	0	0	0	0	0	0	0	0	0	0	0	0	0	1	0	1	0	0	0	0
299	3	1	0	0	0	0	0	0	0	0	0	1	4	0	2	1	2	1	2	7	21	0	0	0	0	0	0	0	0	0	0	0	0	0	0	0	0	0	0	0	0	0	1	0	1	NA	0	0	0
300	7	4	1	1	0	0	3	0	2	0	0	1	3	3	1	1	2	1	2	7	12	1	0	0	1	0	1	0	0	0	0	0	0	0	0	0	0	0	0	0	0	0	1	0	1	0	0	0	0
301	1	4	1	3	0	0	1	1	1	1	0	2	1	1	3	1	2	1	2	7	17	1	1	3	0	0	0	0	0	0	0	0	0	0	0	0	0	0	0	0	0	0	1	0	1	0	0	0	0
302	1	1	0	0	0	0	0	0	0	0	0	2	3	1	3	1	2	1	2	7	17	0	0	0	0	0	0	0	0	0	0	0	0	0	0	0	0	0	0	0	0	0	1	0	1	0	0	0	0
303	5	2	0	4	0	0	0	0	0	0	0	1	4	2	2	1	2	1	2	7	7	0	0	0	0	0	0	1	1	0	0	0	0	0	0	0	0	0	0	0	0	0	0	0	2	0	0	0	0
304	2	3	1	4	0	0	0	0	0	0	0	1	3	3	2	1	2	1	2	7	17	0	0	0	0	0	0	0	0	0	0	0	0	0	0	1	0	0	0	0	0	0	0	0	1	0	0	0	0
305	5	1	0	0	0	0	0	0	0	0	0	2	4	2	4	1	2	1	2	7	13	0	0	0	0	0	0	0	0	0	0	0	0	0	0	0	0	0	0	0	0	0	1	0	1	0	0	0	0
306	1	2	0	0	0	0	0	0	0	0	0	1	3	1	2	1	2	1	2	7	17	0	0	0	0	0	0	1	0	0	0	0	1	0	0	0	0	0	0	0	0	0	0	0	2	0	0	0	0
307	2	1	0	0	0	0	0	0	0	0	0	2	3	1	4	1	2	1	2	7	8	0	0	0	0	0	0	1	0	1	0	1	0	0	0	0	0	0	0	0	0	0	0	0	3	0	0	0	0
308	1	2	0	0	0	0	0	0	0	0	0	2	4	1	4	1	2	1	2	7	17	0	0	0	0	0	0	0	0	0	0	0	0	0	0	0	0	0	0	0	0	0	1	0	1	0	0	0	0
309	2	2	0	0	0	0	0	0	0	0	0	2	3	1	4	1	2	1	2	7	17	0	0	0	0	0	0	0	0	0	0	0	0	0	0	0	0	0	0	0	0	0	1	0	1	0	0	0	0
310	4	2	0	0	0	0	0	0	0	0	0	2	4	0	4	1	2	1	2	7	21	0	0	0	0	0	0	0	0	0	0	0	1	0	0	0	0	0	0	0	0	0	0	0	1	0	0	0	0
311	2	2	0	0	0	0	0	0	0	0	0	2	3	1	2	1	2	1	2	7	17	0	0	0	0	0	0	0	0	0	0	0	0	0	0	0	0	0	0	0	0	0	1	0	1	0	0	0	0
312	3	1	0	0	0	0	0	0	0	0	0	2	4	1	4	1	2	1	2	7	17	0	0	0	0	0	0	0	0	0	0	0	1	0	0	0	0	0	0	0	0	0	0	0	1	0	0	0	0
313	2	2	0	0	0	0	0	0	0	0	0	2	1	2	4	1	2	1	2	7	17	0	0	0	0	0	0	0	0	0	0	0	0	0	0	0	0	0	0	0	0	0	0	1	1	0	0	0	0
314	4	1	0	4	0	0	0	0	0	0	0	1	3	1	4	1	2	1	2	7	18	0	0	0	0	0	0	1	1	0	0	0	1	0	0	0	0	0	0	0	0	0	0	0	3	0	0	0	0
315	1	1	0	0	0	0	0	0	0	0	0	1	4	1	4	1	2	1	2	7	17	0	0	0	0	0	0	0	0	0	0	0	1	0	0	0	0	0	0	0	0	0	0	0	1	0	0	0	0
317	4	1	0	0	0	0	0	0	0	0	0	1	4	6	4	1	2	1	2	7	17	0	0	0	0	0	0	0	0	0	0	0	0	0	0	0	0	0	0	0	0	0	1	0	1	0	0	0	0
318	3	0	0	0	0	0	0	0	0	0	0	2	4	1	4	1	2	1	2	7	9	0	0	0	0	0	0	1	0	0	0	0	0	0	0	0	0	0	0	0	0	0	1	0	2	0	0	0	0
321	1	0	0	0	0	0	0	0	0	0	0	1	4	1	2	1	2	1	2	7	20	0	0	0	0	0	0	1	0	0	0	0	1	0	0	0	0	0	0	0	0	0	0	0	2	0	0	0	0
322	3	0	0	0	0	0	0	0	0	0	0	1	4	1	4	1	2	1	2	7	7	0	0	0	0	0	0	1	0	0	0	0	1	0	0	0	0	0	0	0	0	0	0	0	2	0	0	0	0
323	4	2	0	4	0	0	3	0	1	0	0	1	3	2	2	1	2	1	2	7	14	1	2	0	1	0	2	1	1	0	0	1	0	1	0	0	0	0	0	0	0	0	0	0	4	0	0	0	0
324	5	2	0	3	0	0	3	0	1	0	0	1	4	1	2	1	2	1	2	7	10	1	2	0	1	0	2	1	1	0	1	0	0	0	0	0	1	0	0	0	0	0	0	0	4	0	0	0	0
325	1	2	0	3	0	0	3	0	1	0	0	1	3	5	4	1	2	1	2	7	17	1	2	0	1	0	2	1	1	0	0	0	0	0	0	0	1	0	0	0	0	0	1	0	4	0	0	0	0
326	3	2	0	4	0	0	3	0	1	0	0	2	3	1	4	1	2	1	2	7	17	1	2	0	1	0	2	0	0	1	0	0	0	0	0	0	0	0	0	0	0	0	0	0	1	0	0	0	0
327	2	0	0	0	0	0	0	0	0	0	0	1	4	2	4	1	2	1	2	7	7	0	0	0	0	0	0	0	0	0	0	0	1	0	0	0	0	0	0	0	0	0	0	0	1	0	0	0	0
328	2	4	1	4	0	0	2	0	2	0	0	2	4	2	4	1	1	1	2	7	17	1	3	0	2	0	3	0	0	1	1	0	1	0	0	0	0	0	0	0	0	0	0	0	3	0	0	0	0
329	5	2	0	3	0	0	3	0	1	0	0	1	4	1	4	1	2	1	2	7	21	1	1	0	1	0	3	0	0	0	0	1	0	0	0	0	0	0	0	0	0	0	0	0	1	0	0	0	0
330	5	3	1	3	0	0	3	0	1	0	0	1	3	1	4	1	2	1	2	7	17	1	1	0	1	0	3	0	0	0	0	0	0	0	0	0	1	0	0	0	0	0	0	0	1	0	0	0	0
331	3	2	0	3	0	3	2	0	2	0	0	2	4	2	4	1	2	1	2	7	17	1	2	3	2	0	3	1	1	0	0	0	1	0	0	0	0	0	0	0	0	0	0	0	3	0	0	0	0
332	5	2	0	3	0	1	3	0	1	0	0	2	4	3	2	1	2	1	2	7	7	1	1	0	1	0	2	0	0	0	0	1	0	0	0	0	0	0	0	0	0	0	0	0	1	0	0	0	0
333	5	2	0	3	0	0	3	0	1	0	0	1	4	2	2	1	2	1	2	7	17	1	1	0	1	1	2	1	1	0	0	1	0	0	0	1	1	0	0	0	0	0	1	0	6	0	0	0	0
334	5	2	0	4	0	0	3	0	1	0	0	2	4	2	4	1	2	1	2	7	17	1	2	0	1	0	2	0	1	0	0	0	1	0	0	0	0	0	0	0	0	0	0	0	2	0	0	0	0
335	5	2	0	4	0	0	3	0	1	0	0	2	4	1	4	1	2	1	2	7	17	1	2	0	1	0	3	1	1	0	0	0	0	0	0	0	0	0	0	0	0	0	0	0	2	NA	0	0	0
336	6	2	0	2	0	0	3	0	1	0	0	2	4	1	4	1	2	1	2	7	9	1	1	1	1	1	2	1	1	0	0	0	0	0	0	0	0	0	0	0	0	0	1	0	3	0	0	0	0
337	4	2	0	3	0	8	3	0	1	0	0	2	4	3	4	1	2	1	2	7	8	1	2	0	1	0	2	1	0	0	1	0	1	0	0	0	0	0	0	0	0	0	1	0	4	0	0	0	0
338	6	4	1	4	0	4	2	0	2	0	0	2	4	0	4	1	2	1	2	7	17	1	2	0	1	0	2	0	0	0	0	0	0	0	0	0	0	0	0	0	0	0	1	0	1	0	0	0	0
339	4	2	0	4	0	2	3	0	2	0	0	2	4	1	4	1	2	1	2	7	21	1	3	0	1	0	3	1	0	0	0	0	1	0	0	1	1	0	0	0	0	0	0	0	4	0	0	0	0
340	3	2	0	4	0	5	2	0	2	0	0	2	3	0	4	1	2	1	2	7	21	1	1	0	1	1	2	0	0	0	0	0	0	0	0	0	0	0	0	0	0	0	1	0	1	0	0	0	0
341	6	2	0	2	0	0	3	0	1	0	0	1	3	1	2	1	2	1	2	7	17	1	1	0	1	0	2	1	0	0	0	0	0	0	0	0	0	0	0	0	0	0	0	0	1	0	0	0	0
342	5	2	0	0	0	0	0	0	0	0	0	1	3	1	3	1	2	1	2	7	17	0	0	0	0	0	0	1	1	0	0	0	0	0	0	1	0	0	0	0	0	0	0	0	3	0	0	0	0
343	4	0	0	4	0	0	0	0	0	0	0	1	3	3	4	1	2	1	2	7	17	0	0	0	0	0	0	0	0	0	0	0	0	0	0	0	0	0	0	0	0	0	1	0	1	0	0	0	0
344	4	2	0	0	0	0	0	0	0	0	0	2	4	3	4	1	2	1	0	7	17	0	0	0	0	0	0	0	0	0	0	0	1	0	0	0	0	0	0	0	0	0	0	0	1	0	0	0	0
345	2	1	0	0	0	0	0	0	0	0	0	2	4	0	4	1	2	1	2	7	17	0	0	0	0	0	0	0	0	0	0	0	0	0	0	0	0	0	0	0	0	0	1	0	1	0	0	0	0
346	4	2	0	1	0	3	2	0	1	0	0	1	4	0	4	1	2	1	2	7	14	1	1	0	1	0	0	0	0	0	0	0	1	0	0	0	0	0	0	0	0	0	1	0	2	0	0	0	0
347	1	3	1	3	0	3	3	0	1	0	0	1	3	4	4	1	2	1	2	7	16	1	1	0	1	0	0	0	1	0	0	1	1	0	0	0	0	0	0	0	0	0	1	0	4	0	0	0	0
348	1	0	0	0	0	0	0	0	0	0	0	2	3	3	2	1	1	0	5	2	7	0	0	0	0	0	0	0	0	0	0	1	0	0	0	0	0	0	0	0	0	0	0	0	1	0	0	0	0
350	2	2	0	0	0	0	0	0	0	0	0	2	4	5	4	1	2	1	2	7	17	0	0	0	0	0	0	0	0	0	0	0	0	0	0	1	0	0	0	0	0	0	0	0	1	0	0	0	0
351	4	2	0	4	0	0	0	0	0	0	0	2	4	1	4	1	2	1	2	7	9	0	0	0	0	0	0	0	1	0	0	0	0	0	0	0	0	0	0	0	0	0	0	0	1	0	0	0	0
352	5	1	0	0	0	0	0	0	0	0	0	1	4	2	2	1	2	1	2	7	17	0	0	0	0	0	0	1	1	0	0	0	1	0	0	1	0	0	0	0	0	0	0	0	4	0	0	0	0
353	2	2	0	0	0	0	0	0	0	0	1	2	4	1	4	1	2	1	2	7	17	0	0	0	0	0	0	1	1	0	0	1	0	1	0	1	1	0	0	0	0	0	1	0	7	0	0	0	0
354	2	1	0	0	0	0	0	0	0	0	0	1	4	1	4	NA	2	1	2	7	17	0	0	0	0	0	0	0	1	0	0	0	0	0	0	0	0	0	0	0	0	0	0	0	1	0	0	0	0
355	3	2	0	3	0	0	3	0	1	0	0	1	4	1	4	1	2	1	2	7	17	1	2	0	1	0	2	0	0	0	0	1	0	0	0	0	0	0	0	0	0	0	0	0	1	0	0	0	0
356	5	2	0	1	0	0	2	0	1	0	0	2	4	2	4	1	2	1	2	7	17	1	1	0	1	0	0	0	0	0	0	0	0	1	0	0	0	0	0	0	1	0	1	0	3	0	0	0	0
357	2	0	0	4	0	0	0	0	0	0	0	2	4	2	4	1	2	1	2	7	17	0	0	0	0	0	0	0	0	1	0	0	0	0	0	0	1	0	0	0	0	0	0	0	2	0	0	0	0
358	3	1	0	0	0	0	0	0	0	0	0	1	4	1	4	1	2	1	2	7	14	0	0	0	0	0	0	1	0	0	0	0	0	0	0	0	0	0	0	0	0	0	0	0	1	0	0	NA	0
359	1	0	0	0	0	0	2	0	1	0	0	1	4	1	4	1	2	1	2	1	2	0	0	0	0	0	0	1	0	0	0	0	1	0	0	0	0	0	0	0	0	0	0	0	2	0	0	0	0
360	1	0	0	1	0	0	2	0	1	0	0	2	4	1	4	1	2	1	2	7	21	0	0	0	0	0	0	1	0	0	0	1	0	0	0	0	0	0	0	0	0	0	0	0	2	0	0	0	0
361	1	0	0	0	0	0	0	0	0	0	0	1	4	0	2	1	2	1	2	7	19	0	0	0	0	0	0	1	1	0	0	0	1	1	0	1	0	0	1	0	0	0	1	0	7	0	0	0	0
362	1	1	0	0	0	0	0	0	0	0	0	2	3	0	2	1	2	1	2	7	17	0	0	0	0	0	0	0	0	0	0	0	0	0	0	0	0	0	0	0	0	0	1	0	1	0	0	0	0
363	4	1	0	0	0	0	0	0	0	0	0	1	4	3	2	1	2	1	2	7	19	0	0	0	0	0	0	1	1	0	0	0	1	0	0	0	0	0	0	0	0	0	0	0	3	0	0	0	0
364	1	5	1	4	0	3	2	0	2	0	1	2	4	2	2	2	2	1	2	7	19	1	1	3	1	0	0	0	0	0	0	0	0	0	0	1	0	0	0	0	0	0	0	0	1	1	0	0	0
365	2	3	1	0	0	0	2	1	1	1	0	2	3	5	2	1	1	0	1	1	4	0	1	3	2	0	0	1	1	0	0	0	0	0	0	1	1	0	0	0	0	0	0	0	4	0	0	0	1
366	4	4	1	1	1	2	2	1	1	1	0	1	4	7	2	1	1	0	1	1	14	1	1	3	2	0	1	0	1	0	0	1	0	0	0	0	0	0	0	0	0	0	0	0	2	0	0	1	1
368	4	5	1	3	1	3	3	0	2	0	1	1	4	8	2	1	1	0	1	1	14	1	1	3	2	0	3	1	1	0	0	0	1	0	0	0	0	0	0	0	0	0	1	0	4	0	0	1	0
369	4	4	1	2	0	5	3	0	1	0	0	2	4	9	4	1	1	0	1	2	14	1	2	3	1	0	2	1	1	0	0	1	1	0	0	1	0	0	0	0	0	0	1	0	6	0	0	0	0
370	0	1	0	0	0	0	0	NA	0	0	0	2	0	0	4	1	1	0	5	3	21	0	0	0	0	0	0	0	1	0	0	0	0	0	0	0	0	0	0	0	0	0	0	0	1	NA	0	NA	0
371	3	3	1	1	0	2	3	0	1	0	0	2	4	NA	2	1	1	0	0	1	17	0	1	1	2	0	0	1	1	0	0	1	0	0	0	0	0	0	0	0	0	0	0	0	3	0	0	0	0
372	0	2	0	0	0	0	0	0	0	0	0	2	3	0	2	1	1	0	5	8	21	0	0	0	0	0	0	0	0	0	0	0	0	0	0	0	0	0	0	0	1	0	0	0	1	0	0	0	0
373	4	3	1	0	0	2	2	0	1	0	0	1	4	7	2	1	1	0	0	1	14	0	1	0	0	0	0	1	1	0	0	0	1	0	0	1	0	0	1	0	0	0	0	0	5	0	0	0	0
374	2	1	0	0	0	0	0	0	0	0	0	2	3	4	2	1	1	0	5	1	21	0	0	0	0	0	0	0	0	0	0	0	0	0	0	0	0	0	0	0	0	0	1	0	1	0	0	0	0
376	3	1	0	0	0	0	0	0	0	0	0	1	3	4	4	1	1	0	1	1	2	0	0	0	0	0	0	1	1	1	0	0	1	0	0	0	0	0	0	0	0	0	0	0	4	0	0	0	0
377	1	1	0	0	0	0	0	0	0	0	0	2	4	5	4	1	1	0	5	1	21	0	0	0	0	0	0	0	1	0	1	0	1	0	0	0	0	0	0	0	0	1	0	0	4	0	0	0	0
378	2	0	0	1	0	1	0	0	1	0	0	2	4	4	4	1	1	0	1	2	21	0	1	0	1	0	0	0	0	0	0	0	0	0	0	0	0	0	0	0	0	0	1	0	1	0	0	0	0
379	1	0	0	0	0	0	0	0	0	0	0	1	3	3	2	1	1	0	5	1	17	0	0	0	0	0	0	0	0	0	0	0	0	0	0	0	0	0	0	0	0	0	1	0	1	0	0	0	0
380	1	1	0	0	0	0	0	0	1	0	0	2	3	3	2	1	1	0	5	1	17	0	0	0	0	0	0	0	0	0	0	0	0	0	0	0	0	0	0	0	0	0	1	0	1	0	0	0	0
381	3	1	0	0	0	0	0	0	0	0	0	2	3	0	4	1	2	0	5	2	17	0	0	0	0	0	0	0	0	0	0	0	0	0	0	0	0	0	0	0	0	0	1	0	1	0	0	0	0
382	2	0	0	0	0	0	0	0	0	0	0	2	4	6	4	1	1	0	1	3	17	0	0	0	0	0	0	0	0	0	0	0	0	0	0	0	0	0	0	0	0	0	1	0	1	0	0	0	0
383	1	0	0	0	0	0	0	0	0	0	0	1	3	0	2	1	2	0	0	2	2	0	0	0	0	0	0	0	0	0	0	0	0	0	0	0	0	0	0	0	0	0	1	0	1	0	0	0	0
384	1	0	0	0	0	0	0	0	0	0	0	1	3	0	2	1	2	0	0	8	14	0	0	0	0	0	0	0	0	0	0	0	0	0	0	0	0	0	0	0	0	0	1	0	1	0	0	0	0
385	1	0	0	0	0	0	0	0	0	0	0	2	3	1	2	1	2	0	5	8	18	0	0	0	0	0	0	0	1	0	0	0	0	0	0	0	0	0	0	0	0	0	0	0	1	0	0	0	0
386	1	0	0	0	0	0	0	0	0	0	0	2	4	2	4	1	2	0	5	1	17	0	0	0	0	0	0	0	0	0	0	1	0	0	0	0	0	0	0	0	0	0	0	0	1	0	0	0	0
387	3	3	1	1	0	2	2	0	1	0	0	2	3	1	2	1	2	0	5	1	17	0	0	3	0	0	0	0	1	0	0	1	0	0	0	1	0	0	0	0	0	0	0	0	3	0	0	0	0
388	2	0	0	0	0	0	0	0	0	0	0	1	4	1	2	1	2	0	5	2	9	0	0	0	0	0	0	0	0	0	0	0	0	0	0	0	0	0	0	0	0	0	1	0	1	0	0	0	0
389	3	3	1	2	0	0	3	NA	1	0	0	1	3	10	2	1	6	1	2	7	17	1	0	0	0	0	0	1	1	0	0	1	1	0	0	1	0	0	0	0	0	0	0	0	5	1	0	NA	0
390	1	2	0	4	0	0	1	0	1	0	0	2	4	7	2	1	6	1	2	7	9	1	1	3	0	0	1	0	0	0	0	0	0	0	0	1	0	0	0	0	0	0	0	0	1	0	0	0	0
391	2	3	1	0	0	0	0	0	0	0	0	2	3	5	2	1	6	1	2	NA	21	0	0	0	0	0	0	1	0	0	0	0	0	0	0	0	0	0	0	0	0	0	0	0	1	0	0	0	0
392	2	1	0	0	0	0	0	0	0	0	0	2	3	3	4	1	6	1	2	7	17	0	0	0	0	0	0	0	0	0	0	0	0	0	0	0	0	0	0	0	0	0	1	0	1	0	0	0	0
393	1	2	0	4	0	7	3	1	2	0	0	2	4	4	4	1	6	1	2	7	21	1	3	0	1	0	0	0	0	0	0	0	0	0	0	0	0	0	0	0	0	0	1	0	1	0	0	0	0
394	1	1	0	0	0	0	0	0	0	0	0	2	3	3	1	NA	6	1	2	7	8	0	0	0	0	0	0	0	0	0	1	0	0	0	0	0	0	0	0	0	0	0	0	0	1	0	0	0	0
395	1	1	0	0	0	0	0	0	0	0	0	2	4	4	2	1	6	1	2	7	17	0	0	0	0	0	0	0	0	0	0	0	0	0	0	0	0	0	0	0	0	0	1	0	1	0	0	0	0
396	3	2	0	0	0	0	0	0	0	0	0	2	3	4	4	1	6	1	2	7	8	0	0	0	0	0	0	0	1	0	0	1	0	0	0	0	0	0	0	0	0	0	0	0	2	0	0	NA	0
397	5	0	0	0	0	0	0	0	0	0	0	2	4	4	4	1	6	1	2	7	7	0	0	0	0	0	0	0	0	0	0	0	0	0	0	0	0	0	0	0	0	1	0	0	1	0	0	NA	0
398	1	2	0	0	0	0	0	0	0	0	0	2	4	6	2	1	6	1	2	7	8	0	0	0	0	0	0	0	0	0	0	0	0	0	0	1	0	0	0	0	0	0	0	0	1	0	0	0	0
399	3	4	1	4	0	3	2	0	1	0	0	2	4	4	4	1	6	1	2	7	21	1	1	1	0	0	3	0	0	0	0	0	0	0	0	0	0	0	0	0	0	0	1	0	1	0	0	1	0
400	3	1	0	0	0	0	0	0	0	0	0	1	4	0	2	1	6	1	2	7	9	0	0	0	0	0	0	0	0	0	0	0	0	0	0	0	0	0	0	0	0	0	1	0	1	0	0	0	0
401	3	2	0	0	0	0	0	0	0	0	0	2	4	0	2	1	6	1	2	7	9	0	0	0	0	0	0	0	0	0	0	0	0	0	0	0	0	0	0	0	0	1	0	0	1	0	0	0	0
402	2	3	1	2	0	2	2	0	1	0	0	2	4	0	4	1	6	1	2	7	21	1	3	1	0	0	0	1	1	0	0	0	0	0	0	0	0	0	0	0	0	0	1	0	3	0	0	NA	0
403	0	3	1	4	0	0	2	NA	3	0	0	2	4	0	4	1	6	1	2	7	18	1	3	3	3	1	3	0	1	1	0	0	0	0	0	0	0	0	0	0	0	0	1	0	3	0	0	NA	0
404	3	3	1	0	0	0	0	0	0	0	0	2	4	0	2	NA	6	1	2	7	8	0	0	0	0	0	0	1	0	0	1	0	0	1	0	1	0	0	0	0	0	1	0	0	5	0	0	0	0
405	5	2	0	0	0	0	0	0	0	0	0	2	4	0	2	1	6	1	2	7	21	0	0	0	0	0	0	0	1	0	0	0	0	0	0	0	0	0	0	0	0	0	0	0	1	0	0	0	0
406	2	1	0	0	0	0	0	0	0	0	0	2	4	0	4	1	6	1	2	7	8	0	0	0	0	0	0	0	0	0	0	0	0	0	0	0	0	0	0	0	0	0	1	0	1	0	0	0	0
407	2	0	0	0	0	0	0	0	0	0	0	2	4	0	4	1	6	1	2	7	21	0	0	0	0	0	0	0	0	0	0	0	0	0	0	0	0	0	0	0	0	0	1	0	1	0	0	0	0
409	3	2	0	0	0	0	3	0	1	0	0	2	4	0	4	1	6	1	2	7	8	1	0	0	0	0	1	0	0	0	0	0	0	0	0	0	0	0	0	0	0	1	1	0	2	0	0	NA	0
410	2	3	1	0	0	0	0	0	0	0	0	2	4	0	4	1	6	1	2	7	7	0	0	0	0	0	0	0	0	0	0	0	0	0	0	0	0	0	0	0	0	0	1	0	1	0	0	0	0
411	1	2	0	0	0	0	0	0	0	0	0	1	4	0	2	1	6	1	2	7	20	0	0	0	0	0	0	0	0	0	0	0	0	0	0	0	0	0	0	0	0	0	1	0	1	0	0	0	0
412	4	2	0	0	0	0	0	0	0	0	0	1	4	0	4	1	6	1	2	7	17	0	0	0	0	0	0	0	1	0	0	1	0	0	0	0	0	0	0	0	0	0	0	0	2	0	0	0	0
413	1	0	0	0	0	0	0	0	0	0	0	1	3	0	2	1	6	1	2	1	21	0	0	0	0	0	0	0	0	0	0	0	0	0	0	0	0	0	0	0	0	0	1	0	1	0	0	0	0
414	2	3	1	4	0	0	2	0	1	0	1	2	3	0	2	1	6	1	2	7	21	1	2	0	0	0	0	0	0	0	0	0	1	0	0	0	0	0	0	0	0	0	1	0	2	0	0	0	0
415	1	2	0	0	0	0	0	0	0	0	0	2	4	0	1	NA	6	1	2	7	8	0	0	0	0	0	0	0	0	0	0	0	0	0	0	0	0	0	0	0	0	1	0	0	1	0	0	0	0
416	1	2	0	0	0	0	0	0	0	0	0	2	3	0	2	1	6	1	2	7	8	0	0	0	0	0	0	0	0	0	0	0	0	0	0	1	0	0	0	0	0	0	0	0	1	0	0	0	0
417	1	3	1	0	0	0	0	0	0	0	0	2	4	0	4	1	6	1	2	7	8	0	0	0	0	0	0	0	0	0	0	0	0	0	0	0	0	0	0	0	0	0	1	0	1	NA	0	0	0
418	2	0	0	0	0	0	0	0	0	0	0	2	4	0	4	1	6	1	2	7	17	0	0	0	0	0	0	0	0	0	0	0	0	0	0	0	0	0	0	0	0	0	1	0	1	0	0	0	0
419	5	2	0	0	0	0	2	0	1	0	0	2	4	0	4	1	6	1	2	7	9	1	2	0	0	0	0	0	0	1	0	0	0	0	0	0	0	0	0	0	0	0	1	0	2	0	0	NA	0
420	4	4	1	2	0	3	2	NA	1	0	0	2	4	0	4	1	6	1	2	7	7	1	3	0	1	0	1	0	0	0	0	0	0	0	0	1	0	0	0	0	0	0	0	0	1	0	0	0	0
421	1	3	1	0	0	0	0	0	0	0	0	2	3	0	4	1	6	1	2	NA	8	0	0	0	0	0	0	0	0	0	0	1	0	0	0	0	0	0	0	0	0	0	0	0	1	0	0	0	0
422	3	3	1	0	0	0	0	0	0	0	0	1	4	0	2	1	6	1	2	7	13	0	0	0	0	0	0	0	0	0	0	1	0	0	0	0	0	0	0	0	0	0	0	0	1	0	0	0	0
423	1	2	0	0	0	0	0	0	0	0	0	2	3	0	2	NA	6	1	2	7	6	0	0	0	0	0	0	1	1	0	0	0	0	0	0	0	0	0	0	0	0	0	0	0	2	0	0	0	0
424	3	3	1	0	0	0	0	0	0	0	0	1	4	0	2	1	6	1	2	7	21	0	0	0	0	0	0	0	0	0	0	1	0	0	0	0	0	0	0	0	0	0	0	0	1	0	0	0	0
425	4	1	0	0	0	0	0	0	0	0	0	1	4	0	4	1	6	1	2	7	17	0	0	0	0	0	0	0	0	0	0	1	0	0	0	0	0	0	0	0	0	0	0	0	1	0	0	0	0
426	2	4	1	4	1	5	3	0	2	0	0	2	4	0	2	1	6	1	2	2	21	1	3	3	2	1	3	0	0	0	0	0	0	0	0	0	0	0	0	0	0	0	1	0	1	0	0	0	0
427	4	2	0	4	0	0	1	0	1	0	1	2	3	0	4	1	6	1	2	7	21	1	2	1	1	0	0	0	0	0	0	1	0	0	0	0	0	0	0	0	0	0	0	0	1	0	0	0	0
428	1	2	0	0	0	0	0	0	0	0	0	2	4	0	4	1	6	1	2	7	8	0	0	0	0	0	0	0	0	0	0	0	0	0	0	0	0	0	0	0	0	0	1	0	1	0	0	0	0
429	1	2	0	0	0	0	0	0	0	0	0	2	4	0	2	1	6	1	2	7	8	0	0	0	0	0	0	0	0	0	0	0	0	0	0	0	0	0	0	0	0	0	1	0	1	0	0	0	0
430	4	2	0	2	0	0	2	0	1	0	0	2	4	0	4	1	6	1	2	7	8	1	1	0	0	0	1	0	0	0	0	0	0	0	0	0	0	0	0	0	0	0	1	0	1	0	0	NA	0
431	2	3	1	0	0	0	0	0	0	0	0	2	2	0	4	NA	6	1	2	7	21	0	0	0	0	0	0	0	0	0	0	0	0	0	0	1	0	0	0	0	0	0	0	0	1	0	0	0	0
432	1	1	0	0	0	0	0	0	0	0	0	1	4	0	4	NA	6	1	2	1	19	0	0	0	0	0	0	0	0	0	0	0	0	0	0	0	0	0	0	0	0	0	1	0	1	0	0	0	0
433	1	0	0	0	0	0	0	0	0	0	0	2	4	0	4	1	6	1	2	7	2	0	0	0	0	0	0	0	0	0	0	0	0	0	0	0	0	0	0	0	0	0	1	0	1	0	0	NA	0
434	1	1	0	0	0	0	0	0	0	0	0	2	4	0	4	1	6	1	2	7	4	0	0	0	0	0	0	0	0	0	0	1	0	0	0	0	0	0	0	0	0	0	0	0	1	0	0	0	0
435	1	1	0	0	0	0	0	0	0	0	0	1	3	0	2	1	6	1	2	7	21	0	0	0	0	0	0	0	0	0	0	0	1	0	0	0	0	0	0	0	0	0	0	0	1	0	0	0	0
436	1	0	0	0	0	0	0	0	0	0	0	1	4	0	4	1	6	1	2	7	9	0	0	0	0	0	0	0	0	0	0	0	0	0	0	0	0	0	0	0	0	0	1	0	1	0	0	0	0
437	4	0	0	0	0	0	0	0	0	0	0	1	4	0	2	NA	6	1	2	7	17	0	0	0	0	0	0	0	0	0	0	0	0	0	0	1	0	0	0	0	0	0	0	0	1	0	0	0	0
438	1	2	0	0	0	0	0	0	0	0	0	1	4	0	2	1	6	1	2	7	20	0	0	0	0	0	0	0	0	0	0	0	0	0	0	0	0	0	0	0	0	0	1	0	1	0	0	0	0
439	6	1	0	0	0	0	0	0	0	0	0	2	4	0	4	1	6	1	2	7	8	0	0	0	0	0	0	0	0	0	0	1	0	0	0	0	0	0	0	0	0	0	0	0	1	0	0	0	0
440	2	2	0	0	0	0	0	0	0	0	0	2	4	0	2	1	6	1	2	7	19	0	0	0	0	0	0	1	1	0	0	0	0	0	0	0	0	0	0	0	0	0	0	0	2	0	0	0	0
441	3	3	1	0	0	0	0	0	0	0	0	1	4	0	2	1	6	1	2	7	20	0	0	0	0	0	0	0	0	0	0	1	1	0	0	0	0	0	0	0	0	0	1	0	3	0	0	0	0
442	1	3	1	1	0	0	2	0	1	0	0	2	4	0	2	1	6	1	2	7	19	1	0	0	0	0	0	0	0	0	0	1	1	0	0	0	0	0	0	0	0	0	1	0	3	0	0	NA	0
443	4	1	0	0	0	0	0	0	0	0	0	1	4	0	2	1	6	1	2	7	2	0	0	0	0	0	0	1	1	0	0	0	0	0	0	0	0	0	0	0	0	0	1	0	3	0	0	NA	0
444	1	2	0	0	0	0	0	0	0	0	0	1	4	0	4	1	6	1	2	7	7	0	0	0	0	0	0	1	1	0	0	0	0	0	0	0	0	0	0	0	0	0	0	0	2	0	0	0	0
445	3	3	1	0	0	0	0	0	0	0	0	1	4	0	2	1	6	1	2	7	12	0	0	0	0	0	0	0	0	0	0	1	1	0	0	0	0	0	0	0	0	0	0	0	2	0	0	0	0
446	4	2	0	0	0	0	0	0	0	0	0	2	3	0	2	1	6	1	2	7	8	0	0	0	0	0	0	0	0	0	0	0	0	0	0	0	0	0	0	0	0	0	1	0	1	0	0	0	0
447	1	0	0	0	0	0	0	0	0	0	0	1	4	0	4	1	6	1	2	7	9	0	0	0	0	0	0	0	0	0	0	0	1	0	0	0	0	0	0	0	0	0	1	0	2	0	0	0	0
448	1	1	0	0	0	0	0	0	0	0	0	2	3	0	4	NA	6	1	2	7	8	0	0	0	0	0	0	0	0	0	0	0	0	0	0	1	0	0	1	0	0	0	0	0	2	0	0	0	0
449	1	3	1	0	0	8	3	0	1	0	0	2	3	0	2	1	6	1	2	7	4	0	2	3	3	0	0	0	0	0	0	0	0	0	0	0	0	0	0	0	0	0	1	0	1	0	0	NA	0
450	4	2	0	1	0	3	1	0	1	0	0	2	4	0	4	1	6	1	2	7	17	1	2	3	0	0	0	1	0	0	0	0	0	0	0	0	0	0	0	0	0	0	1	0	2	0	0	NA	0
451	1	0	0	0	0	0	0	0	0	0	0	2	4	0	4	NA	6	1	2	7	9	0	0	0	0	0	0	0	0	0	0	0	0	0	0	0	0	0	0	0	0	0	1	0	1	0	0	0	0
452	4	2	0	0	0	0	0	0	0	0	0	2	4	0	4	1	6	1	2	7	16	0	0	0	0	0	0	0	1	0	0	0	1	0	0	0	0	0	0	0	0	0	0	0	2	0	0	NA	0
453	1	3	1	1	0	0	2	0	1	0	0	1	4	0	NA	1	6	1	2	7	2	0	0	0	1	0	0	0	0	0	0	0	0	0	0	0	0	0	0	0	0	0	1	0	1	0	0	NA	0
454	3	3	1	1	0	0	2	NA	1	0	0	2	3	0	NA	NA	NA	0	NA	NA	NA	1	0	3	0	0	0	0	0	0	0	0	0	0	0	0	0	0	0	0	0	0	1	0	1	NA	0	NA	0
455	0	3	1	4	0	0	0	NA	0	0	0	2	0	0	4	1	1	0	5	3	21	0	0	0	0	0	0	0	0	0	0	0	0	0	0	0	0	0	0	0	0	1	1	0	2	NA	0	NA	0
456	0	1	0	0	0	0	0	NA	0	0	0	2	0	0	NA	NA	NA	0	NA	NA	NA	0	0	0	0	0	0	0	0	0	0	1	0	0	0	1	1	0	0	1	0	0	0	0	4	NA	0	NA	0
457	0	2	0	0	0	0	0	0	0	0	0	2	0	0	2	1	1	0	1	1	17	0	0	0	0	0	0	1	1	0	1	0	1	0	0	0	0	0	0	0	0	0	0	0	4	NA	0	NA	0
458	0	3	1	0	0	0	0	0	0	0	0	1	0	0	NA	NA	NA	0	NA	NA	NA	0	0	0	0	0	0	0	1	0	0	1	0	0	0	1	1	0	0	0	0	0	0	0	4	NA	0	NA	0
459	0	1	0	0	0	0	0	0	0	0	0	2	0	0	NA	NA	NA	0	NA	NA	NA	0	0	0	0	0	0	0	0	1	0	0	0	0	0	0	0	0	0	0	0	0	0	0	1	NA	0	NA	0
460	0	2	0	0	0	0	0	0	0	0	0	2	0	0	NA	NA	NA	0	NA	NA	NA	0	0	0	0	0	0	0	1	1	0	0	1	1	0	0	0	0	0	0	0	0	0	0	4	NA	0	NA	0
461	0	2	0	4	0	0	1	NA	0	0	0	2	0	0	NA	NA	NA	0	NA	NA	NA	1	1	1	0	0	3	0	1	0	0	0	0	1	0	0	0	0	0	0	0	0	0	0	2	NA	0	NA	0
462	0	0	0	4	0	0	0	0	0	0	0	1	0	0	NA	NA	NA	0	NA	NA	NA	0	0	0	0	0	0	0	0	0	0	0	0	1	0	0	0	0	0	0	0	0	0	0	1	NA	0	NA	0
463	0	1	0	0	0	0	0	0	0	0	0	1	0	0	NA	NA	NA	0	NA	NA	NA	0	0	0	0	0	0	0	1	1	0	0	0	1	0	0	0	0	0	0	0	1	0	0	4	NA	0	NA	0
464	0	2	0	2	0	0	0	NA	0	0	0	1	0	0	NA	NA	NA	0	NA	NA	NA	0	0	0	0	0	0	0	0	1	0	0	0	0	0	0	0	0	0	0	0	1	0	0	2	NA	0	NA	0
465	0	3	1	4	0	0	0	NA	0	0	0	1	0	0	NA	NA	NA	0	NA	NA	NA	0	0	0	0	0	0	0	0	0	0	0	0	0	0	0	0	0	0	0	0	0	1	0	1	NA	0	NA	0
466	0	3	1	4	0	0	0	NA	0	0	0	1	0	0	NA	NA	NA	0	NA	NA	NA	0	0	0	0	0	0	0	0	1	0	0	0	0	0	0	0	0	0	0	0	0	0	0	1	NA	0	NA	0
467	0	3	1	4	0	0	0	NA	0	0	0	1	0	0	NA	NA	NA	0	NA	NA	NA	0	0	0	0	0	0	0	1	0	0	0	0	0	0	0	0	0	0	0	0	0	0	0	1	NA	0	NA	0
468	0	0	0	0	0	0	0	0	0	0	0	1	0	0	NA	NA	NA	0	NA	NA	NA	0	0	0	0	0	0	0	0	0	0	0	0	0	0	0	0	0	0	0	0	1	0	0	1	NA	0	NA	0
469	0	1	0	0	0	0	0	0	0	0	0	1	0	0	NA	NA	NA	0	NA	NA	NA	0	0	0	0	0	0	0	0	0	0	1	0	0	0	1	0	0	0	0	0	0	0	0	2	NA	0	NA	0
470	0	1	0	0	0	0	0	0	0	0	0	1	0	0	NA	NA	NA	0	NA	NA	NA	0	0	0	0	0	0	0	1	0	0	0	0	0	0	0	0	0	0	0	0	0	0	0	1	NA	0	NA	0
471	0	2	0	4	0	0	0	NA	0	0	0	1	0	0	NA	NA	NA	0	NA	NA	NA	0	0	0	0	0	0	0	0	0	0	0	0	0	0	0	0	0	0	0	0	1	0	0	1	NA	0	NA	0
472	0	2	0	4	0	0	0	NA	0	0	0	1	0	0	NA	NA	NA	0	NA	NA	NA	0	0	0	0	0	0	0	1	0	0	0	0	0	0	0	0	0	0	0	0	1	0	0	2	NA	0	NA	0
473	0	0	0	0	0	0	0	0	0	0	0	1	0	0	NA	NA	NA	0	NA	NA	NA	0	0	0	0	0	0	0	1	0	0	0	0	0	0	0	0	0	0	0	0	0	0	0	1	NA	0	NA	0
474	2	1	0	0	0	0	0	0	0	0	0	1	4	4	2	1	2	0	1	2	14	0	0	0	0	0	0	0	1	0	0	0	1	0	0	0	0	0	0	0	0	0	0	0	2	1	0	0	0
475	0	3	1	4	0	0	0	NA	0	0	0	1	0	0	NA	NA	NA	0	NA	NA	NA	0	0	0	0	0	0	0	1	0	1	0	1	0	0	1	0	0	0	0	0	0	0	0	4	NA	0	NA	0
476	0	1	0	0	0	0	0	0	0	0	0	2	0	0	NA	NA	NA	0	NA	NA	NA	0	0	0	0	0	0	0	1	0	1	1	0	0	0	0	0	0	0	0	0	0	0	0	3	NA	0	NA	0
478	1	0	0	0	0	0	0	0	0	0	0	1	0	0	NA	NA	NA	0	NA	NA	NA	0	0	0	0	0	0	0	0	0	0	0	0	0	0	0	0	0	0	0	0	0	1	0	1	NA	0	NA	0
479	0	1	0	0	0	0	0	0	0	0	0	1	0	0	NA	NA	NA	0	NA	NA	NA	0	0	0	0	0	0	0	0	0	0	0	0	0	0	0	0	0	0	0	0	0	0	1	1	NA	0	NA	0
480	0	0	0	0	0	0	0	0	0	0	0	2	0	0	NA	NA	NA	0	NA	NA	NA	0	0	0	0	0	0	0	1	1	0	1	0	0	0	0	0	0	0	0	0	0	0	0	3	NA	0	NA	0
481	4	3	1	1	0	2	3	0	1	0	0	2	4	2	4	1	1	0	1	1	21	0	1	3	1	0	0	1	1	0	1	1	1	0	0	1	0	0	0	0	0	0	0	0	6	0	0	0	0
482	0	2	0	4	0	0	0	0	0	0	0	2	4	0	4	1	1	0	1	2	4	0	0	0	0	0	0	0	0	0	0	0	0	0	0	0	0	0	0	0	0	0	1	0	1	0	0	0	0
483	1	2	0	0	0	0	0	0	0	0	0	2	4	0	2	NA	6	0	5	1	8	0	0	0	0		0	0	0	0	0	0	0	0	0	0	0	0	0	0	0	1	0	0	1	0	0	0	0
484	4	3	1	2	0	0	3	0	2	0	1	1	4	6	1	NA	6	0	1	NA	21	1	1	1	2	0	0	1	1	0	1	0	0	0	0	1	0	0	0	0	0	0	0	1	5	0	0	0	0
485	0	1	0	0	0	0	0	0	0	0	0	1	3	0	2	1	1	0	0	8	14	0	0	0	0	0	0	0	0	0	0	0	0	0	0	0	0	0	0	0	0	0	1	0	1	0	0	0	0
486	1	1	0	0	0	0	0	0	0	0	0	1	3	0	2	NA	6	0	5	1	NA	0	0	0	0	0	0	1	1	0	0	0	0	0	0	0	0	0	0	0	0	0	NA	0	2	0	0	0	0
487	0	3	1	1	0	1	2	0	1	0	1	2	2	1	2	1	1	0	5	2	21	0	0	3	0	0	0	1	1	1	0	1	0	0	0	1	0	0	0	0	0	0	1	0	6	0	0	0	0
488	1	1	0	0	0	0	0	0	0	0	0	2	3	3	2	1	1	0	0	8	21	0	0	0	0	0	0	0	0	0	0	0	0	0	0	0	0	0	0	0	0	0	1	0	1	0	0	0	0
489	1	1	0	0	0	0	0	0	0	0	0	2	4	1	2	1	1	0	0	2	7	0	0	0	0	0	0	0	1	0	0	0	0	0	0	0	0	0	0	0	0	0	0	0	1	1	0	0	0
490	0	0	0	0	0	0	0	0	0	0	0	1	3	0	4	1	1	0	5	1	21	0	0	0	0	0	0	0	0	0	0	0	0	0	0	0	0	0	0	0	0	0	0	1	1	NA	0	NA	0
491	2	1	0	0	0	0	0	0	0	0	0	2	3	0	3	1	2	0	5	2	4	0	0	0	0	0	0	0	0	0	0	0	0	0	0	0	0	1	0	0	0	0	0	0	1	0	0	0	0
492	6	1	0	0	0	0	0	0	0	0	0	1	4	7	4	1	6	1	2	7	20	0	0	0	0	0	0	1	1	1	1	0	1	1	1	1	0	0	1	0	1	0	0	1	11	0	0	0	0
493	3	5	1	3	0	3	3	0	0	0	0	1	4	3	2	1	1	0	0	8	4	1	2	0	0	0	0	0	1	0	1	0	0	1	0	0	0	0	0	0	0	0	1	1	5	0	0	0	0
494	3	1	0	0	0	0	0	0	0	0	0	2	3	1	2	1	6	0	5	2	21	0	0	0	0	0	0	0	0	0	0	0	0	0	0	1	0	0	0	0	0	0	0	0	1	0	0	0	0
495	1	1	0	0	0	0	0	0	0	0	0	1	2	1	2	1	6	0	1	1	21	0	0	0	0	0	0	0	1	0	0	1	0	0	0	1	0	0	0	0	0	0	0	1	4	0	0	0	0
496	5	2	0	1	0	5	3	1	1	1	0	1	4	2	4	1	1	0	0	8	19	0	1	1	0	0	0	0	1	0	1	0	0	0	0	0	0	0	0	0	0	0	1	1	4	0	0	0	0
497	2	0	0	0	0	0	0	0	0	0	1	2	3	1	2	1	6	0	0	1	7	0	0	0	0	0	0	0	0	0	0	1	0	0	0	0	0	0	0	0	0	0	0	0	1	0	0	0	0
498	6	4	1	3	0	0	3	0	1	0	1	1	4	3	2	1	1	0	0	8	16	1	2	3	1	1	2	0	1	0	0	1	0	1	0	0	0	0	0	0	0	0	0	1	4	0	0	0	0
499	2	1	0	0	0	0	0	0	0	0	1	2	3	1	2	1	3	0	0	2	7	0	0	0	0	0	0	0	0	0	0	0	0	0	0	0	0	0	0	0	0	0	0	0	0	0	0	0	0
500	3	3	1	4	0	0	0	0	0	0	1	1	4	4	4	1	1	0	0	1	20	0	0	0	0	0	0	0	0	0	0	0	0	0	0	0	0	0	0	0	0	0	1	0	1	0	0	0	0
501	3	4	1	1	0	0	3	0	1	0	1	1	4	2	4	1	1	0	0	1	20	1	0	0	0	0	0	0	1	1	0	0	0	0	0	0	0	0	0	0	0	0	1	0	3	0	0	0	0
502	1	2	0	0	0	0	0	0	0	0	1	2	3	2	4	1	1	0	1	1	7	0	0	0	0	0	0	0	1	1	0	0	0	0	0	1	0	0	0	0	0	0	1	0	4	1	0	0	0
503	2	2	0	0	0	0	2	1	1	1	1	1	3	1	4	1	1	0	1	1	1	0	0	0	0	0	3	1	1	NA	0	0	0	0	0	1	0	1	0	0	0	0	0	0	4	0	0	0	0
505	2	0	0	0	0	0	0	0	0	0	1	2	4	1	2	1	1	0	5	2	17	0	0	0	NA	NA	0	0	0	0	0	0	0	0	0	0	0	0	0	0	0	0	1	0	1	0	0	0	0
506	4	0	0	0	0	0	0	0	0	0	1	2	4	2	2	1	1	0	5	2	17	0	0	0	0	0	0	0	1	0	0	1	0	0	0	1	0	0	0	0	0	0	0	0	3	0	0	0	0
507	2	0	0	0	0	0	0	0	0	0	1	2	4	1	2	1	1	0	0	2	17	0	0	0	0	0	0	0	0	0	0	0	1	0	0	0	0	0	0	0	0	0	0	0	1	0	0	0	0
508	2	2	0	2	0	3	3	0	1	0	1	2	4	1	2	1	1	0	5	1	17	1	1	3	1	0	3	0	0	0	0	0	0	0	0	0	0	0	0	0	0	0	1	0	1	0	0	0	0
509	2	1	0	0	0	0	0	0	0	0	1	2	3	1	2	1	1	0	0	8	17	0	0	0	0	0	0	1	1	0	0	0	0	0	0	0	0	0	0	0	0	0	0	0	2	0	0	0	0
510	3	1	0	0	0	0	0	0	0	0	1	2	3	1	2	1	1	0	5	2	21	0	0	0		0	0	0	1	1	0	1	0	0	0	1	0	0	0	0	0	1	0	0	5	0	0	0	0
511	3	1	0	0	0	0	0	0	0	0	1	2	3	1	2	1	3	0	5	1	17	0	0	0	0	0	0	0	0	0	0	0	0	0	0	0	0	0	0	0	0	0	1	0	1	0	0	0	0
512	2	1	0	0	0	0	0	0	0	0	1	2	4	1	2	1	1	0	1	2	17	0	0	0	0	0	0	0	1	0	0	1	0	0	0	1	0	0	0	0	0	0	0	0	3	0	0	0	0
513	3	4	1	1	0	4	3	0	1	0	1	1	3	1	2	1	6	0	5	1	21	1	3	3	1	1	3	1	1	0	0	0	0	0	0	0	0	0	0	0	0	0	0	0	2	0	0	0	0
514	2	0	0	0	0	0	0	0	0	0	1	2	3	1	2	1	1	0	0	8	17	0	0	0	0	0	0	0	1	0	0	1	1	0	0	0	0	0	1	0	0	0	0	1	5	0	0	0	0
515	3	1	0	0	0	0	0	0	0	0	1	2	3	2	2	1	6	0	0	8	21	0	0	0	0	0	0	0	0	0	0	1	0	0	0	0	0	0	0	0	0	0	0	0	1	0	0	0	0
516	2	0	0	0	0	0	0	0	0	0	1	1	3	2	2	1	1	0	5	1	17	0	0	0	0	0	0	0	0	0	0	0	0	0	0	0	0	0	0	0	0	0	1	0	1	0	0	0	0
517	3	4	1	3	0	0	3	0	1	0	1	1	4	2	4	1	6	0	2	1	21	1	1	3	1	0	3	0	0	0	0	0	0	0	0	0	0	0	0	0	0	0	0	1	1	0	0	0	0
518	2	1	0	0	0	0	0	0	0	0	1	1	4	2	2	1	4	0	0	8	14	0	0	0	0	0	0	1	1	0	0	0	1	0	0	0	0	0	0	0	0	0	0	1	4	0	0	0	0
519	2	1	0	0	0	0	0	0	0	0	1	2	3	1	2	1	3	0	5	2	18	0	0	0	0	0	0	0	1	0	0	0	0	0	0	1	0	0	1	0	0	0	0	0	3	0	0	0	0
520	2	3	1	0	0	5	3	0	1	0	1	2	3	6	4	1	2	0	1	2	17	1	0	3	0	0	0	0	0	0	0	0	0	0	0	0	0	0	0	0	0	0	1	0	1	0	0	0	0
521	2	2	0	0	0	3	1	0	1	0	1	2	3	1	2	1	6	0	1	1	17	0	0	1	0	0	0	0	0	0	0	1	1	0	0	0	0	0	0	0	0	0	0	0	2	0	0	0	0
522	2	0	0	0	0	0	0	0	0	0	1	2	3	6	2	1	2	0	5	1	17	0	0	0	0	0	0	0	0	0	0	0	0	0	0	0	0	0	0	0	0	0	1	0	1	0	0	0	0
523	1	1	0	0	0	0	0	0	0	0	1	2	4	4	4	1	6	0	5	1	4	0	0	0	0	0	0	1	1	0	0	0	1	0	0	0	0	0	0	0	0	1	0	0	4	0	0	0	0
524	1	4	1	3	0	0	3	0	1	0	0	2	4	1	4	1	6	0	5	8	21	1	1	3	1	0	3	1	0	0	1	0	0	0	0	0	0	0	0	0	0	0	0	0	2	0	0	0	0
525	1	0	0	0	0	0	0	0	0	0	0	2	3	1	2	1	6	0	1	8	21	0	0	0	0	0	0	0	0	0	0	1	0	0	0	1	0	0	0	0	0	0	0	0	2	0	0	0	0
526	1	0	0	0	0	0	0	0	0	0	0	1	3	1	2	1	6	0	1	8	21	0	0	0	0	0	0	0	0	0	0	0	0	0	0	1	0	0	0	0	0	0	0	0	1	0	0	0	0
527	3	2	0	4	0	0	2	0	1	0	0	2	4	1	4	1	2	0	5	8	1	1	3	0	1	0	3	0	0	0	0	0	1	0	0	0	0	0	0	0	0	0	0	0	1	0	0	0	0
528	2	2	0	1	0	0	2	0	1	0	0	2	4	1	4	1	2	0	5	1	17	1	1	0	0	0	0	0	0	0	0	0	0	0	0	0	0	0	0	0	0	0	1	0	1	0	0	0	0
530	4	0	0	0	0	0	0	0	0	0	0	2	4	1	2	1	2	0	0	1	17	0	0	0	0	0	0	0	0	0	0	1	0	0	0	0	0	0	0	0	0	0	0	0	1	0	0	0	0
531	3	1	0	0	0	0	0	0	0	0	0	1	4	1	2	1	2	0	1	1	17	0	0	0	0	0	0	1	0	0	0	1	0	0	0	0	0	0	0	0	0	0	0	0	2	0	0	0	0
532	3	0	0	0	0	0	0	0	0	0	0	2	4	2	4	1	2	0	1	1	8	0	0	0	0	0	0	0	0	0	0	0	0	0	0	0	0	0	0	0	0	0	1	0	1	0	0	0	0
533	2	0	0	0	0	0	0	0	0	0	0	2	3	1	2	1	2	0	1	8	1	0	0	0	0	0	0	0	0	0	0	1	0	0	0	0	0	0	0	0	0	0	0	0	1	0	0	0	0
534	2	0	0	0	0	0	0	0	0	0	0	1	3	1	2	1	2	0	1	8	5	0	0	0	0	0	0	0	0	0	0	1	0	1	0	0	0	0	0	0	0	0	NA	0	2	0	0	0	0
535	1	1	0	0	0	0	0	0	0	0	0	1	3	2	2	1	1	0	5	3	18	0	0	0	0	0	0	0	0	0	0	0	0	0	0	0	0	0	0	0	0	0	1	0	1	0	0	0	0
536	2	2	0	1	0	0	2	0	1	0	0	1	4	1	4	1	6	0	5	1	21	1	2	3	1	0	1	0	0	0	0	1	0	0	0	0	0	0	0	0	0	0	0	0	1	0	0	0	0
537	2	1	0	0	0	0	0	0	0	0	0	2	2	2	2	1	6	0	1	8	21	0	0	0	0	0	0	0	0	0	0	1	0	0	0	0	0	0	0	0	0	0	0	0	1	0	0	0	0
538	4	1	0	0	0	0	0	0	0	0	0	2	4	0	4	1	1	0	1	1	4	0	0	0	0	0	0	0	1	0	0	0	0	0	0	0	0	0	0	0	0	0	0	0	1	0	0	0	0
539	4	3	1	2	0	0	3	0	1	0	0	2	3	3	2	1	6	0	1	8	21	1	2	0	1	0	2	0	0	0	0	1	0	0	0	1	0	0	0	0	0	0	0	0	2	0	0	0	0
540	2	3	1	1	0	0	2	0	1	0	0	2	3	2	2	1	6	0	5	1	21	1	1	3	1	0	1	0	0	0	0	1	0	0	0	1	0	0	0	0	0	0	0	0	2	0	0	0	0
542	1	0	0	0	0	0	0	0	0	0	0	1	2	0	2	1	6	0	1	1	21	0	0	0	0	0	0	0	0	0	0	0	0	0	0	0	0	0	0	0	0	0	0	0	0	0	0	0	0
543	2	2	0	0	0	0	1	0	1	0	0	2	2	1	2	1	6	0	1	1	21	0	1	3	0	0	1	0	0	0	0	0	0	0	0	1	0	0	0	0	0	0	0	0	1	0	0	0	0
544	3	4	1	2	0	2	3	0	1	0	0	2	3	7	2	1	6	0	5	8	21	1	1	3	1	0	2	0	0	0	0	0	0	0	0	0	0	0	1	0	0	0	0	0	1	0	0	0	0
545	1	0	0	0	0	0	0	0	0	0	0	1	3	1	2	1	6	0	5	8	21	0	0	0	0	0	0	0	0	0	0	0	0	0	0	1	0	0	0	0	0	0	0	0	1	0	0	0	0
546	2	2	0	1	0	0	2	0	1	0	0	2	4	0	2	1	6	0	5	3	21	1	2	3	1	0	1	0	0	0	0	0	0	0	0	0	0	0	0	0	0	0	0	0	0	0	0	0	0
547	4	3	1	1	0	0	3	0	1	0	0	2	4	1	4	1	6	0	5	2	21	1	2	3	1	0	1	0	0	0	0	0	0	0	0	0	0	0	0	0	0	0	0	0	0	0	0	0	0
548	3	4	1	0	0	0	0	0	0	0	1	2	4	2	4	1	1	0	1	2	18	0	0	0	0	0	0	1	0	0	0	1	1	0	0	0	0	0	0	0	0	0	NA	0	3	0	0	0	0
549	2	1	0	0	0	0	0	0	0	0	0	2	4	0	2	1	1	0	0	2	9	0	0	0	0	0	0	0	0	0	0	0	0	0	0	0	0	0	0	0	0	0	1	0	1	0	0	0	0
550	1	3	1	0	0	0	0	0	0	0	0	2	4	0	2	1	1	0	0	2	19	0	0	0	0	0	0	0	0	0	0	0	0	0	0	0	0	0	0	0	0	0	1	0	1	0	0	0	0
552	5	0	0	0	0	0	0	0	0	0	0	2	4	2	4	1	2	0	1	1	19	0	0	0	0	0	0	0	1	0	0	1	0	0	0	0	0	0	0	0	0	0	1	0	3	0	0	0	0
554	2	2	0	0	1	0	0	0	0	0	1	2	3	0	4	1	4	0	1	1	7	0	0	0	0	0	0	0	0	0	0	0	0	0	0	0	0	0	0	0	0	1	0	0	1	0	0	0	0
[truncated: 9 more columns]

## Sheet: 7
SEQN	IC	FRAIL.S	FRAIL	ADL	SAS	VAS	Morse	Social support	EQ-5D	Abuse risk	Caregiver supp.I	Gender	Age index	Comorbidity	Marital status	EthnicitEthnicity	RA	Nursing home
3	3	2	0	3	0	0	2	0	1	0	0	2	3	2	2	1	2	1
15	1	4	1	2	0	0	3	0	1	0	1	1	4	4	4	1	3	1
17	2	3	1	4	2	0	1	0	1	0	1	2	3	1	4	1	3	1
18	2	1	0	0	0	0	0	0	0	0	1	2	4	0	4	1	3	1
19	2	2	0	4	0	0	1	0	1	0	1	2	4	1	4	1	3	1
20	3	3	1	2	0	0	2	0	1	0	1	1	4	1	2	1	3	1
21	4	3	1	2	0	6	2	0	1	0	1	2	4	1	2	1	3	1
22	4	1	0	0	0	0	0	0	0	0	1	1	4	2	4	1	3	1
23	2	2	0	2	0	5	2	0	1	0	1	2	3	1	4	1	3	1
26	2	1	0	4	0	0	0	0	0	0	1	1	3	2	1	1	6	1
27	1	0	0	4	0	0	0	0	0	0	1	1	3	3	1	1	6	1
28	2	0	0	4	0	0	0	0	0	0	1	1	3	3	1	1	6	1
29	1	1	0	4	0	0	0	0	0	0	1	1	4	4	1	1	6	1
30	4	1	0	4	0	0	0	0	0	0	1	1	3	3	1	1	6	1
31	3	2	0	0	0	0	0	0	0	0	1	1	4	5	1	NA	6	1
32	4	0	0	0	0	0	0	0	0	0	1	1	3	4	1	1	6	1
33	5	2	0	0	0	0	0	0	0	0	1	1	3	10	1	1	6	1
34	1	2	0	0	0	2	1	0	1	0	1	1	3	3	1	1	6	1
35	3	3	1	0	0	0	0	0	0	0	1	1	3	5	1	1	6	1
36	4	2	0	1	0	0	1	0	1	0	1	1	3	4	1	1	6	1
37	1	0	0	0	0	0	0	0	0	0	1	2	4	6	2	1	1	0
38	2	0	0	0	0	0	0	0	0	0	1	2	3	4	2	1	1	0
39	2	2	0	0	0	0	1	NA	1	0	1	1	3	0	2	1	1	0
40	5	1	0	0	0	0	0	0	1	0	1	1	3	3	2	1	1	0
41	4	2	0	0	0	2	1	0	1	0	1	2	3	7	4	1	1	0
42	5	0	0	0	0	0	0	0	0	0	1	2	4	5	2	1	1	0
43	2	0	0	0	0	0	0	0	0	0	1	1	4	5	2	1	1	0
44	5	1	0	0	0	0	0	0	0	0	1	2	3	6	2	1	1	0
45	3	0	0	0	0	0	0	0	0	0	1	1	3	4	2	1	1	0
46	4	2	0	0	0	2	2	0	1	0	1	2	4	6	4	1	1	0
47	0	1	0	0	0	0	0	0	0	0	1	2	3	0	2	1	1	0
48	3	3	1	1	0	8	0	0	1	0	1	1	4	7	4	1	1	0
49	1	0	0	0	0	0	0	0	0	0	1	1	4	7	2	1	1	0
50	2	2	0	0	0	0	0	1	1	1	1	2	3	1	4	1	1	0
51	4	1	0	0	1	0	0	0	0	0	1	2	4	4	2	1	1	0
52	3	0	0	0	1	0	0	0	0	0	1	1	4	4	2	1	1	0
55	1	1	0	0	0	0	0	0	0	0	1	1	3	1	2	1	1	0
57	1	2	0	0	0	1	0	0	1	0	1	2	3	1	4	1	1	0
58	1	0	0	0	0	0	0	0	0	0	1	1	4	0	2	1	1	0
59	5	3	1	0	0	0	0	0	0	0	1	1	3	0	4	1	1	0
60	1	1	0	0	0	0	0	0	0	0	1	2	3	0	2	1	1	0
61	1	0	0	0	0	0	0	0	0	0	1	1	3	0	2	1	1	0
62	1	3	1	0	0	0	0	0	0	0	1	1	3	3	1	1	6	0
63	2	0	0	0	0	0	0	0	0	0	1	1	3	0	2	1	1	0
64	2	3	1	4	0	3	3	0	1	0	1	1	3	3	1	1	6	0
66	1	1	0	0	0	0	0	0	0	0	1	1	4	0	4	1	1	0
67	2	2	0	0	0	0	0	0	0	0	1	2	4	1	4	1	1	0
68	3	0	0	0	0	0	0	0	0	0	1	1	3	0	2	1	3	0
69	2	2	0	1	0	0	1	0	1	0	1	1	4	1	2	1	1	0
70	1	0	0	0	0	0	0	1	1	0	1	2	4	0	4	1	1	0
71	3	1	0	0	0	0	0	0	0	0	1	2	3	0	2	1	1	0
72	1	0	0	0	0	0	0	0	0	0	1	2	4	0	4	1	1	0
73	4	1	0	0	0	0	0	0	0	0	0	2	4	0	4	1	2	0
75	1	0	0	0	0	0	0	0	0	0	0	1	4	0	2	NA	1	0
76	1	0	0	0	0	0	0	0	0	0	0	2	3	0	2	1	1	0
77	1	0	0	0	0	0	0	0	0	0	0	1	3	0	2	1	1	0
78	1	0	0	0	0	0	0	0	0	0	0	1	4	0	2	1	1	0
79	1	0	0	0	0	0	0	0	0	0	1	1	3	1	2	1	1	0
80	3	0	0	0	0	0	0	0	0	0	0	2	4	0	4	1	1	0
81	1	0	0	0	0	0	0	0	0	0	1	2	4	0	2	1	1	0
82	1	2	0	0	0	0	0	0	0	0	0	2	4	2	2	1	1	0
83	1	0	0	0	0	0	0	0	0	0	0	1	4	1	2	1	1	0
84	1	0	0	0	0	0	0	0	0	0	1	2	4	1	4	1	1	0
85	4	0	0		0	0	0	0	0	0	0	1	4	1	4	1	3	0
88	7	2	0	1	0	1	3	0	1	0	1	2	3	1	4	1	3	0
89	3	2	0	0	0	5	2	0	1	0	0	2	3	4	2	1	1	0
90	2	4	1	1	0	2	2	0	1	0	0	1	4	5	2	1	1	0
91	6	3	1	0	0	0	0	0	0	0	0	2	4	4	4	1	1	0
92	1	0	0	0	0	0	0	0	0	0	0	1	3	2	3	1	1	0
93	2	0	0	0	0	0	0	0	0	0	0	2	4	0	4	2	1	0
94	5	3	1	1	0	3	2	0	1	0	1	1	4	0	2	1	1	0
95	2	0	0	0	0	0	0	0	0	0	1	1	3	0	2	1	1	0
96	2	0	0	0	0	0	0	0	0	0	0	2	3	0	2	1	1	0
97	1	1	0	0	0	0	0	0	0	0	1	1	3	0	2	1	1	0
98	2	3	1	4	0	3	3	0	2	0	1	2	3	2	2	1	1	0
99	2	0	0	0	0	0	0	0	0	0	0	2	0	0	2	1	1	0
101	1	1	0	0	0	0	0	0	0	0	0	1	3	0	2	1	1	0
102	3	5	1	0	0	5	3	0	2	0	1	1	4	1	2	1	1	0
103	1	0	0	0	0	0	0	0	0	0	0	2	3	0	2	1	1	0
104	3	1	0	0	0	0	0	0	1	0	0	2	3	1	2	1	3	0
105	3	4	1	2	0	0	2	0	1	0	0	2	3	0	2	1	1	0
106	2	3	1	1	0	0	1	0	1	0	1	1	3	2	4	1	3	1
107	3	2	0	0	0	0	0	0	0	0	1	1	4	0	4	1	3	1
108	3	1	0	0	0	0	0	0	0	0	1	1	3	2	4	1	3	1
109	3	0	0	0	0	0	0	0	0	0	0	1	4	0	4	1	3	1
110	1	0	0	0	0	0	0	0	0	0	0	1	4	0	2	1	1	0
111	2	1	0	0	0	0	0	0	0	0	0	1	4	2	2	1	1	0
112	1	1	0	0	0	0	0	0	0	0	0	2	3	0	2	1	1	0
113	3	2	0	4	0	2	0	0	1	0	1	2	4	1	4	1	3	1
114	3	3	1	4	0	0	1	1	1	0	1	1	4	4	4	1	3	1
115	1	1	0	0	0	0	0	0	0	0	0	2	4	1	4	1	1	0
116	1	2	0	4	0	0	0	0	1	0	0	2	3	0	3	1	3	1
117	2	2	0	0	0	0	0	0	0	0	1	2	4	5	4	1	3	1
118	3	0	0	0	0	0	0	0	0	0	0	1	4	0	2	1	3	1
119	4	2	0	0	0	0	0	0	0	0	1	2	3	5	4	1	3	1
120	2	0	0	0	0	0	0	0	0	0	0	1	4	0	4	1	3	1
121	1	0	0	0	0	0	0	0	0	0	1	2	4	2	4	1	3	1
123	4	4	1	1	0	2	3	0	1	0	0	2	4	3	2	1	1	0
124	3	2	0	0	0	0	0	0	0	0	0	1	4	0	4	1	3	1
125	2	2	0	0	0	0	0	0	0	0	1	1	3	2	4	1	3	1
126	4	2	0	2	0	0	1	1	1	1	0	2	4	0	4	1	3	1
127	5	2	0	4	0	0	1	0	2	0	1	2	4	3	4	1	3	1
128	3	2	0	4	0	2	0	1	1	0	0	1	4	0	4	1	3	1
129	1	0	0	0	0	0	0	0	0	0	0	2	4	0	4	1	1	0
130	1	0	0	0	0	0	0	0	0	0	0	2	4	0	2	1	1	0
131	1	1	0	0	0	0	0	0	0	0	0	1	3	0	2	1	1	0
132	3	3	1	0	0	0	0	0	0	0	0	2	3	0	2	1	1	0
133	5	2	0	0	0	0	0	0	0	0	1	1	4	2	2	1	1	0
134	3	0	0	0	0	0	0	0	0	0	0	1	4	0	2	1	2	0
135	1	0	0	0	0	0	0	0	0	0	0	2	4	0	2	1	2	0
136	3	0	0	0	0	0	0	0	0	0	0	1	4	1	2	1	1	0
137	5	2	0	1	0	2	3	0	1	0	0	2	4	0	4	1	1	0
138	1	0	0	0	0	0	0	0	0	0	0	1	4	0	4	1	1	0
140	3	5	1	4	0	2	2	0	1	0	0	2	4	2	4	1	1	0
141	1	0	0	0	0	0	0	0	0	0	0	1	4	0	4	1	1	0
142	1	0	0	0	0	0	0	0	0	0	0	1	4	0	2	1	1	0
143	1	1	0	0	0	0	0	0	0	0	0	2	4	0	2	1	1	0
144	1	0	0	0	0	0	0	0	0	0	0	2	3	1	2	1	1	0
145	1	0	0	0	0	0	0	0	0	0	0	2	4	0	2	1	1	0
146	0	3	1	0	0	0	0	0	0	0	0	2	4	0	4	NA	NA	0
147	1	0	0	0	0	0	0	0	0	0	0	2	4	0	2	1	1	0
148	3	4	1	2	0	2	2	0	1	0	0	2	4	0	2	1	1	0
149	1	2	0	1	0	0	2	0	1	0	0	2	4	1	4	1	1	0
150	1	0	0	0	0	0	0	0	0	0	0	2	4	0	2	1	1	0
151	1	0	0	0	0	0	0	0	0	0	0	2	4	0	4	1	1	0
152	1	1	0	0	0	0	0	0	0	0	0	1	4	0	4	1	1	0
153	3	0	0	0	0	0	0	0	0	0	0	1	4	0	2	1	1	0
154	1	1	0	0	0	0	0	0	0	0	0	1	3	0	4	1	1	0
155	1	0	0	0	0	0	0	0	0	0	0	2	3	0	2	1	1	0
156	1	0	0	0	0	0	0	0	0	0	0	1	3	0	3	1	1	0
157	1	1	0	0	0	0	0	0	0	0	0	2	4	0	2	1	1	0
158	1	3	1	1	0	4	3	NA	1	0	0	2	4	7	4	1	1	0
159	3	2	0	1	0	0	2	0	1	0	0	2	0	0	2	1	1	0
160	1	0	0	0	0	0	0	0	0	0	0	2	3	1	4	1	1	0
161	1	1	0	0	0	0	0	0	0	0	0	2	3	0	2	1	1	0
163	1	1	0	0	0	0	0	0	0	0	0	1	4	1	2	1	1	0
164	1	0	0	0	0	0	0	0	0	0	0	2	3	0	2	1	1	0
165	1	0	0	0	0	0	0	0	0	0	0	1	4	0	2	1	1	0
166	2	1	0	0	0	0	0	0	0	0	0	1	4	0	4	1	1	0
167	5	0	0	0	0	0	0	0	0	0	0	2	4	0	4	1	1	0
168	0	1	0	0	0	0	0	0	0	0	0	1	0	0	2	1	1	0
169	0	1	0	0	0	0	0	0	0	0	0	1	3	0	2	1	1	0
172	0	0	0	0	0	0	0	0	0	0	0	2	0	0	4	1	1	0
173	1	2	0	0	0	0	0	0	0	0	0	2	0	0	4	1	1	0
174	2	2	0	0	0	3	2	1	0	1	0	2	4	2	4	1	1	0
175	1	1	0	0	0	0	0	0	0	0	0	1	3	1	2	1	3	0
176	3	0	0	0	0	0	0	0	0	0	0	2	3	0	4	1	1	0
177	2	1	0	0	0	0	1	0	1	0	0	1	3	3	4	1	3	0
178	4	0	0	0	0	0	0	0	0	0	0	1	4	1	4	1	3	1
179	4	2	0	4	0	0	2	1	1	0	0	1	4	1	4	1	3	1
180	2	2	0	0	0	0	0	0	0	0	0	2	4	1	4	1	3	1
181	2	2	0	0	0	0	0	0	0	0	0	2	3	4	2	1	3	1
182	3	2	0	0	0	0	0	0	0	0	0	1	3	2	4	1	3	1
183	7	4	1	2	0	3	3	0	1	0	0	2	4	8	2	1	1	0
184	3	4	1	4	0	5	2	1	2	0	0	1	3	2	4	1	3	1
185	3	0	0	0	0	0	0	0	0	0	0	1	4	0	2	1	1	0
186	1	1	0	0	0	0	0	0	0	0	0	2	4	0	2	1	1	0
187	2	0	0	0	0	0	0	0	0	0	0	1	3	0	1	1	3	1
188	1	1	0	0	0	0	0	0	0	0	0	1	3	0	2	1	3	0
189	1	1	0	0	0	0	0	0	0	0	0	2	3	0	2	1	3	0
190	2	3	1	3	0	5	2	1	2	0	0	2	4	0	4	1	3	1
191	6	2	0	0	0	0	0	0	0	0	0	2	4	0	4	1	3	1
192	3	2	0	0	0	0	0	0	0	0	0	1	4	0	4	1	3	1
193	2	2	0	0	0	0	0	0	0	0	0	1	3	0	4	1	3	1
194	5	1	0	0	0	0	0	0	0	0	0	1	3	1	4	NA	3	1
195	4	0	0	0	0	0	0	0	0	0	0	1	4	0	4	1	3	1
196	2	0	0	0	0	0	0	0	0	0	0	2	4	0	4	1	3	1
197	2	2	0	0	0	0	0	0	0	0	0	2	3	1	4	1	3	1
198	2	0	0	0	0	0	0	0	0	0	0	1	3	1	4	1	3	1
199	1	2	0	0	0	0	1	0	1	0	0	1	3	4	2	1	6	0
200	3	1	0	0	0	0	0	0	0	0	0	2	4	4	4	1	6	0
201	1	0	0	0	0	0	0	0	0	0	0	1	3	0	2	1	1	0
202	3	3	1	1	1	10	3	NA	2	0	0	2	0	0	4	1	1	0
203	1	0	0	0	0	0	0	0	0	0	0	1	4	5	2	1	1	0
204	5	3	1	2	1	5	3	0	2	0	0	2	4	4	4	1	2	0
205	5	2	0	1	0	3	1	0	1	0	0	2	4	1	4	1	1	0
206	1	2	0	0	0	0	0	0	0	0	1	2	4	5	2	1	2	0
207	3	1	0	1	0	0	1	0	1	0	0	1	4	6	2	1	1	0
208	4	2	0	0	0	2	1	0	1	0	0	2	3	3	4	1	2	0
209	4	2	0	0	0	2	0	1	1	1	1	2	4	5	2	1	1	0
210	1	4	1	4	0	3	3	0	2	0	1	2	3	3	2	1	1	0
211	1	1	0	0	0	0	0	0	0	0	1	1	4	5	2	1	1	0
212	1	0	0	0	0	0	0	0	0	0	0	2	3	3	2	1	1	0
215	6	3	1	1	0	0	0	1	1	1	1	1	4	6	2	1	1	0
216	7	5	1	4	0	9	3	1	2	1	1	2	4	7	2	1	1	0
218	1	0	0	0	0	0	0	0	0	0	0	1	3	3	2	1	1	0
219	4	0	0	0	0	0	0	0	0	0	0	1	4	4	2	1	1	0
220	0	0	0	0	0	0	0	0	0	0	0	1	4	4	2	1	1	0
221	2	1	0	0	0	0	0	0	0	0	0	2	3	4	2	1	1	0
222	0	0	0	0	0	0	0	0	0	0	0	1	4	4	2	1	1	0
223	0	1	0	0	0	0	0	0	0	0	0	2	4	4	2	1	1	0
224	1	4	1	1	0	5	3	NA	1	0	0	2	0	0	2	1	1	0
225	3	2	0	1	2	1	1	0	1	0	0	2	4	4	2	1	1	0
226	3	3	1	1	0	0	2	0	1	0	0	1	4	1	4	1	2	0
228	4	1	0	0	0	0	3	0	1	0	0	1	4	7	2	1	1	0
229	4	3	1	0	0	0	0	0	0	0	0	2	4	6	2	1	1	0
230	6	2	0	1	0	0	1	0	1	0	1	1	4	5	4	1	1	0
231	5	2	0	1	0	0	1	0	1	0	0	2	4	4	2	1	1	0
232	3	3	1	1	0	0	2	0	1	0	0	1	4	3	2	1	1	0
233	3	3	1	1	0	0	2	1	1	0	0	1	4	1	2	1	1	0
234	2	0	0	0	0	0	0	0	0	0	0	2	3	0	2	1	1	0
236	1	2	0	0	0	0	0	0	0	0	1	1	3	1	2	1	1	0
237	2	3	1	1	0	0	0	0	0	0	1	2	4	0	4	1	2	0
238	6	0	0	0	0	0	0	0	0	0	0	1	3	4	2	1	1	0
239	4	0	0	0	0	0	0	0	0	0	0	1	4	0	4	1	1	0
240	2	1	0	1	0	0	2	0	1	0	0	1	4	0	4	1	1	0
241	2	0	0	0	0	0	0	0	0	0	0	2	4	0	4	1	1	0
242	2	3	1	0	0	0	0	0	0	0	0	2	4	1	4	1	1	0
243	3	0	0	0	0	0	0	0	0	0	0	2	3	1	2	1	2	1
244	4	0	0	0	0	0	0	0	0	0	0	1	3	0	1	1	2	1
245	6	0	0	0	0	0	0	0	0	0	0	1	3	2	3	1	2	1
246	6	0	0	0	0	0	0	0	0	0	0	1	4	1	4	1	2	1
247	6	1	0	0	0	0	0	0	0	0	0	2	4	2	4	1	2	1
248	2	1	0	0	0	0	0	0	0	0	0	1	4	1	4	1	2	1
249	5	1	0	0	0	0	0	0	0	0	0	1	3	3	4	1	2	1
250	4	0	0	1	0	2	2	1	1	0	0	1	3	0	1	1	2	1
251	4	3	1	4	0	2	2	0	2	0	0	1	3	4	2	1	2	1
252	5	1	0	0	0	0	0	0	0	0	0	2	4	0	4	1	2	1
253	4	0	0	0	0	0	0	0	0	0	0	1	3	3	4	NA	2	1
254	2	0	0	0	0	0	0	0	0	0	0	1	4	1	4	1	2	1
255	3	1	0	0	0	0	0	0	0	0	0	2	4	0	4	1	2	1
256	4	0	0	0	0	0	0	0	0	0	0	2	4	1	4	1	2	1
257	7	2	0	4	0	2	1	0	1	0	0	2	4	0	1	1	2	1
258	4	0	0	0	0	0	0	0	0	0	0	1	4	0	4	1	2	1
259	2	2	0	4	0	5	2	0	1	0	0	2	3	3	4	1	2	1
260	4	0	0	3	0	0	2	0	2	0	0	2	3	1	4	1	2	1
261	5	0	0	0	0	0	0	0	0	0	0	1	3	1	2	1	1	0
262	3	0	0	0	0	0	0	0	0	0	0	2	4	2	2	1	2	1
263	6	2	0	3	0	2	3	0	1	0	0	2	4	2	4	1	2	1
264	1	0	0	1	0	0	1	0	1	0	0	1	4	0	4	1	1	0
265	3	2	0	0	0	0	0	0	0	0	0	2	4	2	4	1	1	0
266	3	1	0	4	0	0	0	0	0	0	0	1	4	1	4	1	1	0
267	4	1	0	0	0	0	0	0	0	0	0	1	4	1	4	1	1	0
268	0	2	0	0	0	0	0	0	1	0	0	2	0	0	4	1	1	0
269	2	2	0	4	0	5	1	0	1	0	1	1	3	2	1	1	3	1
270	3	2	0	0	0	0	0	0	0	0	1	2	4	2	4	1	3	1
271	3	0	0	0	0	0	0	0	0	0	1	2	4	2	2	1	3	1
272	4	2	0	0	0	0	0	0	0	0	1	1	4	1	2	1	3	1
273	5	0	0	0	0	0	0	0	0	0	1	2	3	2	2	1	3	1
274	4	0	0	0	0	0	0	0	0	0	1	1	3	1	4	1	3	1
275	4	3	1	3	0	4	3	1	2	1	1	2	4	7	4	1	2	0
276	3	4	1	0	0	0	0	0	0	0	0	2	4	10	4	1	1	0
277	2	0	0	0	0	0	0	0	0	0	0	2	4	1	4	1	2	0
278	2	1	0	0	0	0	0	0	0	0	0	2	3	7	2	1	1	0
279	5	2	0	0	0	0	1	0	1	0	0	1	4	4	2	1	1	0
280	3	2	0	1	0	2	3	0	1	0	0	2	4	7	2	1	1	0
281	2	0	0	0	0	0	0	0	0	0	0	1	3	3	1	1	1	0
282	1	1	0	0	0	0	0	0	0	0	0	2	3	3	2	1	1	0
283	1	0	0	0	0	0	0	0	1	0	0	1	3	3	2	1	6	0
284	2	0	0	0	0	0	0	0	0	0	0	2	3	0	4	1	2	0
285	2	1	0	0	0	0	0	0	0	0	0	1	3	6	4	1	2	1
286	2	0	0	0	0	0	0	0	0	0	0	2	3	1	1	1	2	1
287	4	0	0	0	0	0	0	0	0	0	0	1	4	2	1	1	2	1
288	3	1	0	0	0	0	0	0	0	0	0	1	4	4	2	1	2	1
289	1	0	0	0	0	0	0	0	0	0	0	2	3	1	2	1	2	1
290	1	0	0	0	0	0	0	0	0	0	0	2	4	1	4	1	2	1
291	1	1	0	0	0	0	0	0	0	0	0	2	4	0	4	1	2	1
292	2	1	0	0	0	0	0	0	0	0	0	2	4	1	4	1	2	1
293	4	1	0	0	0	0	0	0	0	0	0	2	4	1	4	1	2	1
294	1	0	0	0	0	0	0	0	0	0	0	2	3	2	1	1	2	1
295	3	1	0	0	0	0	0	0	0	0	0	2	4	0	4	1	2	1
296	3	1	0	0	0	0	0	0	0	0	0	2	3	3	4	1	2	1
297	2	2	0	0	0	0	0	0	0	0	0	1	2	1	3	1	1	1
298	2	1	0	0	0	0	0	0	0	0	0	2	0	1	4	1	2	1
299	3	1	0	0	0	0	0	0	0	0	0	1	4	0	2	1	2	1
300	7	4	1	1	0	0	3	0	2	0	0	1	3	3	1	1	2	1
301	1	4	1	3	0	0	1	1	1	1	0	2	1	1	3	1	2	1
302	1	1	0	0	0	0	0	0	0	0	0	2	3	1	3	1	2	1
303	5	2	0	4	0	0	0	0	0	0	0	1	4	2	2	1	2	1
304	2	3	1	4	0	0	0	0	0	0	0	1	3	3	2	1	2	1
305	5	1	0	0	0	0	0	0	0	0	0	2	4	2	4	1	2	1
306	1	2	0	0	0	0	0	0	0	0	0	1	3	1	2	1	2	1
307	2	1	0	0	0	0	0	0	0	0	0	2	3	1	4	1	2	1
308	1	2	0	0	0	0	0	0	0	0	0	2	4	1	4	1	2	1
309	2	2	0	0	0	0	0	0	0	0	0	2	3	1	4	1	2	1
310	4	2	0	0	0	0	0	0	0	0	0	2	4	0	4	1	2	1
311	2	2	0	0	0	0	0	0	0	0	0	2	3	1	2	1	2	1
312	3	1	0	0	0	0	0	0	0	0	0	2	4	1	4	1	2	1
313	2	2	0	0	0	0	0	0	0	0	0	2	1	2	4	1	2	1
314	4	1	0	4	0	0	0	0	0	0	0	1	3	1	4	1	2	1
315	1	1	0	0	0	0	0	0	0	0	0	1	4	1	4	1	2	1
317	4	1	0	0	0	0	0	0	0	0	0	1	4	6	4	1	2	1
318	3	0	0	0	0	0	0	0	0	0	0	2	4	1	4	1	2	1
321	1	0	0	0	0	0	0	0	0	0	0	1	4	1	2	1	2	1
322	3	0	0	0	0	0	0	0	0	0	0	1	4	1	4	1	2	1
323	4	2	0	4	0	0	3	0	1	0	0	1	3	2	2	1	2	1
324	5	2	0	3	0	0	3	0	1	0	0	1	4	1	2	1	2	1
325	1	2	0	3	0	0	3	0	1	0	0	1	3	5	4	1	2	1
326	3	2	0	4	0	0	3	0	1	0	0	2	3	1	4	1	2	1
327	2	0	0	0	0	0	0	0	0	0	0	1	4	2	4	1	2	1
328	2	4	1	4	0	0	2	0	2	0	0	2	4	2	4	1	1	1
329	5	2	0	3	0	0	3	0	1	0	0	1	4	1	4	1	2	1
330	5	3	1	3	0	0	3	0	1	0	0	1	3	1	4	1	2	1
331	3	2	0	3	0	3	2	0	2	0	0	2	4	2	4	1	2	1
332	5	2	0	3	0	1	3	0	1	0	0	2	4	3	2	1	2	1
333	5	2	0	3	0	0	3	0	1	0	0	1	4	2	2	1	2	1
334	5	2	0	4	0	0	3	0	1	0	0	2	4	2	4	1	2	1
335	5	2	0	4	0	0	3	0	1	0	0	2	4	1	4	1	2	1
336	6	2	0	2	0	0	3	0	1	0	0	2	4	1	4	1	2	1
337	4	2	0	3	0	8	3	0	1	0	0	2	4	3	4	1	2	1
338	6	4	1	4	0	4	2	0	2	0	0	2	4	0	4	1	2	1
339	4	2	0	4	0	2	3	0	2	0	0	2	4	1	4	1	2	1
340	3	2	0	4	0	5	2	0	2	0	0	2	3	0	4	1	2	1
341	6	2	0	2	0	0	3	0	1	0	0	1	3	1	2	1	2	1
342	5	2	0	0	0	0	0	0	0	0	0	1	3	1	3	1	2	1
343	4	0	0	4	0	0	0	0	0	0	0	1	3	3	4	1	2	1
344	4	2	0	0	0	0	0	0	0	0	0	2	4	3	4	1	2	1
345	2	1	0	0	0	0	0	0	0	0	0	2	4	0	4	1	2	1
346	4	2	0	1	0	3	2	0	1	0	0	1	4	0	4	1	2	1
347	1	3	1	3	0	3	3	0	1	0	0	1	3	4	4	1	2	1
348	1	0	0	0	0	0	0	0	0	0	0	2	3	3	2	1	1	0
350	2	2	0	0	0	0	0	0	0	0	0	2	4	5	4	1	2	1
351	4	2	0	4	0	0	0	0	0	0	0	2	4	1	4	1	2	1
352	5	1	0	0	0	0	0	0	0	0	0	1	4	2	2	1	2	1
353	2	2	0	0	0	0	0	0	0	0	1	2	4	1	4	1	2	1
354	2	1	0	0	0	0	0	0	0	0	0	1	4	1	4	NA	2	1
355	3	2	0	3	0	0	3	0	1	0	0	1	4	1	4	1	2	1
356	5	2	0	1	0	0	2	0	1	0	0	2	4	2	4	1	2	1
357	2	0	0	4	0	0	0	0	0	0	0	2	4	2	4	1	2	1
358	3	1	0	0	0	0	0	0	0	0	0	1	4	1	4	1	2	1
359	1	0	0	0	0	0	2	0	1	0	0	1	4	1	4	1	2	1
360	1	0	0	1	0	0	2	0	1	0	0	2	4	1	4	1	2	1
361	1	0	0	0	0	0	0	0	0	0	0	1	4	0	2	1	2	1
362	1	1	0	0	0	0	0	0	0	0	0	2	3	0	2	1	2	1
363	4	1	0	0	0	0	0	0	0	0	0	1	4	3	2	1	2	1
364	1	5	1	4	0	3	2	0	2	0	1	2	4	2	2	2	2	1
365	2	3	1	0	0	0	2	1	1	1	0	2	3	5	2	1	1	0
366	4	4	1	1	1	2	2	1	1	1	0	1	4	7	2	1	1	0
368	4	5	1	3	1	3	3	0	2	0	1	1	4	8	2	1	1	0
369	4	4	1	2	0	5	3	0	1	0	0	2	4	9	4	1	1	0
370	0	1	0	0	0	0	0	NA	0	0	0	2	0	0	4	1	1	0
371	3	3	1	1	0	2	3	0	1	0	0	2	4	NA	2	1	1	0
372	0	2	0	0	0	0	0	0	0	0	0	2	3	0	2	1	1	0
373	4	3	1	0	0	2	2	0	1	0	0	1	4	7	2	1	1	0
374	2	1	0	0	0	0	0	0	0	0	0	2	3	4	2	1	1	0
375	1	0	0	0	0	0	0	0		0	0	1	3	3	2	1	1	0
376	3	1	0	0	0	0	0	0	0	0	0	1	3	4	4	1	1	0
377	1	1	0	0	0	0	0	0	0	0	0	2	4	5	4	1	1	0
378	2	0	0	1	0	1	0	0	1	0	0	2	4	4	4	1	1	0
379	1	0	0	0	0	0	0	0	0	0	0	1	3	3	2	1	1	0
380	1	1	0	0	0	0	0	0	1	0	0	2	3	3	2	1	1	0
381	3	1	0	0	0	0	0	0	0	0	0	2	3	0	4	1	2	0
382	2	0	0	0	0	0	0	0	0	0	0	2	4	6	4	1	1	0
383	1	0	0	0	0	0	0	0	0	0	0	1	3	0	2	1	2	0
384	1	0	0	0	0	0	0	0	0	0	0	1	3	0	2	1	2	0
385	1	0	0	0	0	0	0	0	0	0	0	2	3	1	2	1	2	0
386	1	0	0	0	0	0	0	0	0	0	0	2	4	2	4	1	2	0
387	3	3	1	1	0	2	2	0	1	0	0	2	3	1	2	1	2	0
388	2	0	0	0	0	0	0	0	0	0	0	1	4	1	2	1	2	0
389	3	3	1	2	0	0	3	NA	1	0	0	1	3	10	2	1	6	1
390	1	2	0	4	0	0	1	0	1	0	0	2	4	7	2	1	6	1
391	2	3	1	0	0	0	0	0	0	0	0	2	3	5	2	1	6	1
392	2	1	0	0	0	0	0	0	0	0	0	2	3	3	4	1	6	1
393	1	2	0	4	0	7	3	1	2	0	0	2	4	4	4	1	6	1
394	1	1	0	0	0	0	0	0	0	0	0	2	3	3	1	NA	6	1
395	1	1	0	0	0	0	0	0	0	0	0	2	4	4	2	1	6	1
396	3	2	0	0	0	0	0	0	0	0	0	2	3	4	4	1	6	1
397	5	0	0	0	0	0	0	0	0	0	0	2	4	4	4	1	6	1
398	1	2	0	0	0	0	0	0	0	0	0	2	4	6	2	1	6	1
399	3	4	1	4	0	3	2	0	1	0	0	2	4	4	4	1	6	1
400	3	1	0	0	0	0	0	0	0	0	0	1	4	0	2	1	6	1
401	3	2	0	0	0	0	0	0	0	0	0	2	4	0	2	1	6	1
402	2	3	1	2	0	2	2	0	1	0	0	2	4	0	4	1	6	1
403	0	3	1	4	0	0	2	NA	3	0	0	2	4	0	4	1	6	1
404	3	3	1	0	0	0	0	0	0	0	0	2	4	0	2	NA	6	1
405	5	2	0	0	0	0	0	0	0	0	0	2	4	0	2	1	6	1
406	2	1	0	0	0	0	0	0	0	0	0	2	4	0	4	1	6	1
407	2	0	0	0	0	0	0	0	0	0	0	2	4	0	4	1	6	1
409	3	2	0	0	0	0	3	0	1	0	0	2	4	0	4	1	6	1
410	2	3	1	0	0	0	0	0	0	0	0	2	4	0	4	1	6	1
411	1	2	0	0	0	0	0	0	0	0	0	1	4	0	2	1	6	1
412	4	2	0	0	0	0	0	0	0	0	0	1	4	0	4	1	6	1
413	1	0	0	0	0	0	0	0	0	0	0	1	3	0	2	1	6	1
414	2	3	1	4	0	0	2	0	1	0	1	2	3	0	2	1	6	1
415	1	2	0	0	0	0	0	0	0	0	0	2	4	0	1	NA	6	1
416	1	2	0	0	0	0	0	0	0	0	0	2	3	0	2	1	6	1
417	1	3	1	0	0	0	0	0	0	0	0	2	4	0	4	1	6	1
418	2	0	0	0	0	0	0	0	0	0	0	2	4	0	4	1	6	1
419	5	2	0	0	0	0	2	0	1	0	0	2	4	0	4	1	6	1
420	4	4	1	2	0	3	2	NA	1	0	0	2	4	0	4	1	6	1
421	1	3	1	0	0	0	0	0	0	0	0	2	3	0	4	1	6	1
422	3	3	1	0	0	0	0	0	0	0	0	1	4	0	2	1	6	1
423	1	2	0	0	0	0	0	0	0	0	0	2	3	0	2	NA	6	1
424	3	3	1	0	0	0	0	0	0	0	0	1	4	0	2	1	6	1
425	4	1	0	0	0	0	0	0	0	0	0	1	4	0	4	1	6	1
426	2	4	1	4	1	5	3	0	2	0	0	2	4	0	2	1	6	1
427	4	2	0	4	0	0	1	0	1	0	1	2	3	0	4	1	6	1
428	1	2	0	0	0	0	0	0	0	0	0	2	4	0	4	1	6	1
429	1	2	0	0	0	0	0	0	0	0	0	2	4	0	2	1	6	1
430	4	2	0	2	0	0	2	0	1	0	0	2	4	0	4	1	6	1
431	2	3	1	0	0	0	0	0	0	0	0	2	2	0	4	NA	6	1
432	1	1	0	0	0	0	0	0	0	0	0	1	4	0	4	NA	6	1
433	1	0	0	0	0	0	0	0	0	0	0	2	4	0	4	1	6	1
434	1	1	0	0	0	0	0	0	0	0	0	2	4	0	4	1	6	1
435	1	1	0	0	0	0	0	0	0	0	0	1	3	0	2	1	6	1
436	1	0	0	0	0	0	0	0	0	0	0	1	4	0	4	1	6	1
437	4	0	0	0	0	0	0	0	0	0	0	1	4	0	2	NA	6	1
438	1	2	0	0	0	0	0	0	0	0	0	1	4	0	2	1	6	1
439	6	1	0	0	0	0	0	0	0	0	0	2	4	0	4	1	6	1
440	2	2	0	0	0	0	0	0	0	0	0	2	4	0	2	1	6	1
441	3	3	1	0	0	0	0	0	0	0	0	1	4	0	2	1	6	1
442	1	3	1	1	0	0	2	0	1	0	0	2	4	0	2	1	6	1
443	4	1	0	0	0	0	0	0	0	0	0	1	4	0	2	1	6	1
444	1	2	0	0	0	0	0	0	0	0	0	1	4	0	4	1	6	1
445	3	3	1	0	0	0	0	0	0	0	0	1	4	0	2	1	6	1
446	4	2	0	0	0	0	0	0	0	0	0	2	3	0	2	1	6	1
447	1	0	0	0	0	0	0	0	0	0	0	1	4	0	4	1	6	1
448	1	1	0	0	0	0	0	0	0	0	0	2	3	0	4	NA	6	1
449	1	3	1	0	0	8	3	0	1	0	0	2	3	0	2	1	6	1
450	4	2	0	1	0	3	1	0	1	0	0	2	4	0	4	1	6	1
451	1	0	0	0	0	0	0	0	0	0	0	2	4	0	4	NA	6	1
452	4	2	0	0	0	0	0	0	0	0	0	2	4	0	4	1	6	1
453	1	3	1	1	0	0	2	0	1	0	0	1	4	0	NA	1	6	1
454	3	3	1	1	0	0	2	NA	1	0	0	2	3	0	NA	NA	NA	0
455	0	3	1	4	0	0	0	NA	0	0	0	2	0	0	4	1	1	0
456	0	1	0	0	0	0	0	NA	0	0	0	2	0	0	NA	NA	NA	0
457	0	2	0	0	0	0	0	0	0	0	0	2	0	0	2	1	1	0
458	0	3	1	0	0	0	0	0	0	0	0	1	0	0	NA	NA	NA	0
459	0	1	0	0	0	0	0	0	0	0	0	2	0	0	NA	NA	NA	0
460	0	2	0	0	0	0	0	0	0	0	0	2	0	0	NA	NA	NA	0
461	0	2	0	4	0	0	1	NA	0	0	0	2	0	0	NA	NA	NA	0
462	0	0	0	4	0	0	0	0	0	0	0	1	0	0	NA	NA	NA	0
463	0	1	0	0	0	0	0	0	0	0	0	1	0	0	NA	NA	NA	0
464	0	2	0	2	0	0	0	NA	0	0	0	1	0	0	NA	NA	NA	0
465	0	3	1	4	0	0	0	NA	0	0	0	1	0	0	NA	NA	NA	0
466	0	3	1	4	0	0	0	NA	0	0	0	1	0	0	NA	NA	NA	0
467	0	3	1	4	0	0	0	NA	0	0	0	1	0	0	NA	NA	NA	0
468	0	0	0	0	0	0	0	0	0	0	0	1	0	0	NA	NA	NA	0
469	0	1	0	0	0	0	0	0	0	0	0	1	0	0	NA	NA	NA	0
470	0	1	0	0	0	0	0	0	0	0	0	1	0	0	NA	NA	NA	0
471	0	2	0	4	0	0	0	NA	0	0	0	1	0	0	NA	NA	NA	0
472	0	2	0	4	0	0	0	NA	0	0	0	1	0	0	NA	NA	NA	0
473	0	0	0	0	0	0	0	0	0	0	0	1	0	0	NA	NA	NA	0
474	2	1	0	0	0	0	0	0	0	0	0	1	4	4	2	1	2	0
475	0	3	1	4	0	0	0	NA	0	0	0	1	0	0	NA	NA	NA	0
476	0	1	0	0	0	0	0	0	0	0	0	2	0	0	NA	NA	NA	0
478	1	0	0	0	0	0	0	0	0	0	0	1	0	0	NA	NA	NA	0
479	0	1	0	0	0	0	0	0	0	0	0	1	0	0	NA	NA	NA	0
480	0	0	0	0	0	0	0	0	0	0	0	2	0	0	NA	NA	NA	0
481	4	3	1	1	0	2	3	0	1	0	0	2	4	2	4	1	1	0
482	0	2	0	4	0	0	0	0	0	0	0	2	4	0	4	1	1	0
483	1	2	0	0	0	0	0	0	0	0	0	2	4	0	2	NA	6	0
484	4	3	1	2	0	0	3	0	2	0	1	1	4	6	1	NA	6	0
485	0	1	0	0	0	0	0	0	0	0	0	1	3	0	2	1	1	0
486	1	1	0	0	0	0	0	0	0	0	0	1	3	0	2	NA	6	0
487	0	3	1	1	0	1	2	0	1	0	1	2	2	1	2	1	1	0
488	1	1	0	0	0	0	0	0	0	0	0	2	3	3	2	1	1	0
489	1	1	0	0	0	0	0	0	0	0	0	2	4	1	2	1	1	0
490	0	0	0	0	0	0	0	0	0	0	0	1	3	0	4	1	1	0
491	2	1	0	0	0	0	0	0	0	0	0	2	3	0	3	1	2	0
492	6	1	0	0	0	0	0	0	0	0	0	1	4	7	4	1	6	1
493	3	5	1	3	0	3	3	0	0	0	0	1	4	3	2	1	1	0
494	3	1	0	0	0	0	0	0	0	0	0	2	3	1	2	1	6	0
495	1	1	0	0	0	0	0	0	0	0	0	1	2	1	2	1	6	0
496	5	2	0	1	0	5	3	1	1	1	0	1	4	2	4	1	1	0
497	2	0	0	0	0	0	0	0	0	0	1	2	3	1	2	1	6	0
498	6	4	1	3	0	0	3	0	1	0	1	1	4	3	2	1	1	0
499	2	1	0	0	0	0	0	0	0	0	1	2	3	1	2	1	3	0
500	3	3	1	4	0	0	0	0	0	0	1	1	4	4	4	1	1	0
501	3	4	1	1	0	0	3	0	1	0	1	1	4	2	4	1	1	0
502	1	2	0	0	0	0	0	0	0	0	1	2	3	2	4	1	1	0
503	2	2	0	0	0	0	2	1	1	1	1	1	3	1	4	1	1	0
505	2	0	0	0	0	0	0	0	0	0	1	2	4	1	2	1	1	0
506	4	0	0	0	0	0	0	0	0	0	1	2	4	2	2	1	1	0
507	2	0	0	0	0	0	0	0	0	0	1	2	4	1	2	1	1	0
508	2	2	0	2	0	3	3	0	1	0	1	2	4	1	2	1	1	0
509	2	1	0	0	0	0	0	0	0	0	1	2	3	1	2	1	1	0
510	3	1	0	0	0	0	0	0	0	0	1	2	3	1	2	1	1	0
511	3	1	0	0	0	0	0	0	0	0	1	2	3	1	2	1	3	0
512	2	1	0	0	0	0	0	0	0	0	1	2	4	1	2	1	1	0
513	3	4	1	1	0	4	3	0	1	0	1	1	3	1	2	1	6	0
514	2	0	0	0	0	0	0	0	0	0	1	2	3	1	2	1	1	0
515	3	1	0	0	0	0	0	0	0	0	1	2	3	2	2	1	6	0
516	2	0	0	0	0	0	0	0	0	0	1	1	3	2	2	1	1	0
517	3	4	1	3	0	0	3	0	1	0	1	1	4	2	4	1	6	0
518	2	1	0	0	0	0	0	0	0	0	1	1	4	2	2	1	4	0
519	2	1	0	0	0	0	0	0	0	0	1	2	3	1	2	1	3	0
520	2	3	1	0	0	5	3	0	1	0	1	2	3	6	4	1	2	0
521	2	2	0	0	0	3	1	0	1	0	1	2	3	1	2	1	6	0
522	2	0	0	0	0	0	0	0	0	0	1	2	3	6	2	1	2	0
523	1	1	0	0	0	0	0	0	0	0	1	2	4	4	4	1	6	0
524	1	4	1	3	0	0	3	0	1	0	0	2	4	1	4	1	6	0
525	1	0	0	0	0	0	0	0	0	0	0	2	3	1	2	1	6	0
526	1	0	0	0	0	0	0	0	0	0	0	1	3	1	2	1	6	0
527	3	2	0	4	0	0	2	0	1	0	0	2	4	1	4	1	2	0
528	2	2	0	1	0	0	2	0	1	0	0	2	4	1	4	1	2	0
529	3	1	0	0	0	0	0	0		0	0	2	4	2	4	1	2	0
530	4	0	0	0	0	0	0	0	0	0	0	2	4	1	2	1	2	0
531	3	1	0	0	0	0	0	0	0	0	0	1	4	1	2	1	2	0
532	3	0	0	0	0	0	0	0	0	0	0	2	4	2	4	1	2	0
533	2	0	0	0	0	0	0	0	0	0	0	2	3	1	2	1	2	0
534	2	0	0	0	0	0	0	0	0	0	0	1	3	1	2	1	2	0
535	1	1	0	0	0	0	0	0	0	0	0	1	3	2	2	1	1	0
536	2	2	0	1	0	0	2	0	1	0	0	1	4	1	4	1	6	0
537	2	1	0	0	0	0	0	0	0	0	0	2	2	2	2	1	6	0
538	4	1	0	0	0	0	0	0	0	0	0	2	4	0	4	1	1	0
539	4	3	1	2	0	0	3	0	1	0	0	2	3	3	2	1	6	0
540	2	3	1	1	0	0	2	0	1	0	0	2	3	2	2	1	6	0
542	1	0	0	0	0	0	0	0	0	0	0	1	2	0	2	1	6	0
543	2	2	0	0	0	0	1	0	1	0	0	2	2	1	2	1	6	0
544	3	4	1	2	0	2	3	0	1	0	0	2	3	7	2	1	6	0
545	1	0	0	0	0	0	0	0	0	0	0	1	3	1	2	1	6	0
546	2	2	0	1	0	0	2	0	1	0	0	2	4	0	2	1	6	0
547	4	3	1	1	0	0	3	0	1	0	0	2	4	1	4	1	6	0
548	3	4	1	0	0	0	0	0	0	0	1	2	4	2	4	1	1	0
549	2	1	0	0	0	0	0	0	0	0	0	2	4	0	2	1	1	0
550	1	3	1	0	0	0	0	0	0	0	0	2	4	0	2	1	1	0
552	5	0	0	0	0	0	0	0	0	0	0	2	4	2	4	1	2	0
554	2	2	0	0	1	0	0	0	0	0	1	2	3	0	4	1	4	0
